# Supplementary material for: Taxon-Function Decoupling as an Adaptive Signature of Lake Microbial Metacommunities Under a Chronic Polymetallic Pollution Gradient
Source: Front Microbiol. 2018 May 3;9:869. doi: 10.3389/fmicb.2018.00869 (PMC5943556; doi:10.3389/fmicb.2018.00869)
Supplement: Supplementary File S2 — This file summarized statistics of reads, contigs, and ORFs MG-RAST annotations per lake metagenome. [file Data_Sheet_2.XLSX]

## Sheet: Contigs_and_Reads
	meta_lake_opasatica_cov	meta_lake_dasserat_cov	meta_bay_arnoux_cov	meta_lake_arnoux_cov	meta_lake_turcotte_cov
MG-RAST project number	4523097.3	4523096.3	4523094.3	4523095.4	4523098.3
contigs (contigs)	362441	467455	640524	758235	362778
avg_contigs_(bp)	173 ± 305	176 ± 317	233 ± 832	208 ± 637	206 ± 502
dataset_size_(10E6bp)	62.9025	82.4644	149.744	158.225	74.9017
GC_ %	46 ± 10	47 ± 10	46 ± 10	45 ± 10	52 ± 11
contigs_qc	357804	462262	634268	750240	358352
avg_contigs_qc	152 ± 78	157 ± 84	186 ± 182	170 ± 139	176 ± 125
GC_ %_qc	46 ± 10	47 ± 10	46 ± 10	45 ± 10	46 ± 10
%_pass_qc	98.7206	98.8891	99.0233	98.9456	98.78
dataset_size_qc_(10E6bp)	54.3995	72.7881	118.333	128.034	63.1405
ORF_number_FragGenScan	348932	452858	627228	348932	351325
contigs_potential_protein	337097	429184	595191	709364	339779
%_potential_protein	93.0074	91.8129	92.9225	93.5546	93.6603
contigs_annoted_protein	80056	106097	87808	133569	118532
%_annoted_protein	22.088	22.6967	13.7088	17.6158	32.6734
contigs_functionnal category	63670	86458	65150	101871	98763
%_associated_subsystem_protein	17.567	18.4955	10.1714	13.4353	27.2241
contigs_matching_to_a_taxa	150674	211557	166612	247454	217863
Archaea	703	957	669	1049	781
Bacteria	137752	202442	149664	228794	211187
Eukaryota	2318	3309	6026	8111	3888
Viruses	9508	4399	9455	8731	1792
Other	393	450	798	769	215
%_Archaea	0.46657	0.45236	0.401532	0.423917	0.358482
%_Bacteria	91.4239	95.6915	89.8279	92.4592	96.9357
%_Eukaryota	1.53842	1.56412	3.61679	3.27778	1.78461
%_Viruses	6.31031	2.07935	5.67486	3.52833	0.822535
%_Other	0.260828	0.212709	0.478957	0.310765	0.0986859
BHC_contigs_matching	163716	229527	183250	273923	242880
BHC_archaea	764	1029	724	1153	903
BHC_Bacteria	151216	220886	166707	256166	236373
BHC_Eukaryota	2295	3303	6680	8263	3857
BHC_Viruses	9427	4288	9113	8305	1711
BHC_Other	14	21	26	36	36
BHC_%_Archaea	0.466662	0.448313	0.395089	0.420921	0.371789
BHC_%_Bacteria	92.3648	96.2353	90.9724	93.5175	97.3209
BHC_%_Eukaryota	1.40182	1.43905	3.64529	3.01654	1.58803
BHC_%_Viruses	5.75814	1.86819	4.97299	3.03187	0.704463
BHC_%_Other	0.00855139	0.00914925	0.0141883	0.0131424	0.0148221
LCA_contigs_matching_to_a_taxa	72746	100761	81304	120474	112835
LCA_Archaea	99	122	134	163	128
LCA_Bacteria	66106	97086	73774	112265	110844
LCA_Eukaryota	536	808	2303	2893	1028
LCA_Viruses	6003	2540	5092	4777	827
LCA_Other	2	205	1	376	8
LCA_%_Archaea	0.13609	0.121079	0.164814	0.135299	0.11344
LCA_%_Bacteria	90.8724	96.3528	90.7385	93.1861	98.2355
LCA_%_Eukaryota	0.73681	0.801898	2.83258	2.40135	0.911065
LCA_%_Viruses	8.252	2.52082	6.26291	3.96517	0.732929
LCA_%_Other	0.00274929	0.203452	0.00122995	0.312101	0.00709
α_diversity	814005	897803	959383	897803	647265
contigs_matching_to_a_subsystems(COG)	54998	80225	56197	88551	92812
contigs_matching_to_a_subsystems(SEED)	103006	149923	98040	152356	140361
contigs_matching_to_a_subsystems(SEED_Hierarchical)	97776	142132	93342	146413	134738
%_contigs_matching_COG	15.1743	17.1621	8.7736	11.6786	25.5837
%_contigs_matching_SEED	26.9771	32.0722	15.3062	20.0935	37.1406
number_of_subsystems_functions	5339	5638	5778	6306	6288
AGS	1125.5	1168.69	2551.46	1851.35	1870.92
ESC	602485	748334	469679	766249	255392
BHC=Best Hits Classification
LCA=Lowest Common Ancestor
AGS =Average Genome Size
ESC=Effective Sequence Size
Lake	Number of sequenced reads per metagenome	Base pairs per lake
OPA (Opasatica)	37757498	3775749800
DAS (Dasserat)	34348616	3434861600
BAR (Bay Arnoux)	65816414	6581641400
LAR (Lake Arnoux)	86287438	8628743800
TUR (Lake Turcotte )	82263052	8226305200
Total	306473018	30647301800

## Sheet: Reads_Filtration_Statistics
LAKES MG		Before filtration	After filtration with Nesoni clip		After filtration and synchronization				After filtration, synchronization and merge (FLASH V1.2.11)
			Quality phred offset (score 33); Minimum length cutoff (50 bp) ; No homopolymers						Default parameters
		Number	Number of filtered reads	(%) Percent of filtered reads	Number of kept reads	(%) Percent of kept reads	Number of lost single good filtered reads	(%) Percent of lost single good filtered reads	Number of combined reads after synchronization	(%) Percent of combined reads after synchronization	Number of not combined reads after synchronization	(%) Percent of not combined reads after synchronization
OPA	R1	18878749	17006891	90.0848	11187194	59.2581	5819697	30.8267	612123	5.47164	10575071	56.0157
	R2	18878749	14146661	74.9343	11187194	59.2581	2959467	15.6762			10575071	56.0157
DAS	R1	43143719	40407201	93.6572	28340489	65.6886	12066712	27.9686	8059751	28.439	20280738	47.0074
	R2	43143719	34541942	80.0625	28340489	65.6886	6201453	14.3739			20280738	47.0074
BAR	R1	32908207	31235474	94.917	23620648	71.7774	7614826	23.1396	4679530	19.8112	18941118	57.5574
	R2	32908207	28150895	85.5437	23620648	71.7774	4530247	13.7663			18941118	57.5574
LAR	R1	17174308	15730918	91.5956	9931421	57.8272	5799497	33.7684	844291	8.50121	9087130	52.9112
	R2	17174308	12496290	72.7615	9931421	57.8272	2564869	14.9343			9087130	52.9112
TUR	R1	41131526	35675369	86.7349	13849760	33.6719	21825609	53.063	402036	2.90284	13447724	32.6944
	R2	41131526	21491326	52.2503	13849760	33.6719	7641566	18.5784			13447724	32.6944
LAKES MG		Number of reads used in sub-sampling approach per metagenome				%
		Number of not combined reads after synchronization	Number of lost single good filtered reads	Number of combined reads after synchronization	Total	Percent of Final reads
OPA	R1	10575071	5819697	612123	30541429
	R2	10575071	2959467			80.8884
	R1_R2
DAS	R1	20280738	12066712	8059751	66889392
	R2	20280738	6201453			77.5193
	R1_R2
BAR	R1	18941118	7614826	4679530	54706839
	R2	18941118	4530247			83.1204
	R1_R2
LAR	R1	9087130	5799497	844291	27382917
	R2	9087130	2564869			79.7206
	R1_R2
TUR	R1	13447724	21825609	402036	56764659
	R2	13447724	7641566			69.0038
	R1_R2
