# Supplementary material for: Taxon-Function Decoupling as an Adaptive Signature of Lake Microbial Metacommunities Under a Chronic Polymetallic Pollution Gradient
Source: Front Microbiol. 2018 May 3;9:869. doi: 10.3389/fmicb.2018.00869 (PMC5943556; doi:10.3389/fmicb.2018.00869)
Supplement: Supplementary File S4 — This file resumed details of NMDS plots. NMDS loadings, abundance clusters and points labels of all genus (Table 1), Proteobacteria (Table 2), Actinobacteria (Table 3), Cyanobacteria (Table 4), then of all subsystems (Table 5) were reported for assuming a better understanding of NMDS figures and Supplementary Figures. [file Data_Sheet_4.XLSX]

## Sheet: NMDS_all_Genus_Coord.
Genus	NMDS1	NMDS2	clusters	colors
Abiotrophia	0.12058	0.385277	1	green
Acinetobacter	-0.018931	0.00398977	1	green
Alistipes	-0.00426679	-0.00230158	1	green
Aminobacterium	-0.262405	-0.24054	1	green
Anaerostipes	-0.23845	-0.0504131	1	green
Arcanobacterium	-0.262405	-0.24054	1	green
Atopobium	-0.0999092	0.024986	1	green
Azohydromonas	0.12058	0.385277	1	green
Azotobacter	-0.0044192	0.0509104	1	green
Bacteroides	-0.0221034	0.0019257	1	green
Beutenbergia	-0.0792511	0.00104628	1	green
Bifidobacterium	-0.0303709	-0.0175774	1	green
Blastopirellula	-0.102493	0.0153741	1	green
Bordetella	-0.00459878	0.00506885	1	green
Brachyspira	-0.0998414	-0.0305998	1	green
Campylobacter	0.0117495	0.0268863	1	green
Capnocytophaga	-0.0103246	0.0271517	1	green
Carnobacterium	-0.0342267	0.132315	1	green
Catenulispora	-0.062465	-0.00386712	1	green
Cellulophaga	-0.00728903	0.00249184	1	green
Cenarchaeum	-0.262405	-0.24054	1	green
Chlamydia	0.12058	0.385277	1	green
Chryseobacterium	0.00557411	0.0182599	1	green
Chthoniobacter	-0.262405	-0.24054	1	green
Coprobacillus	-0.224909	-0.0249841	1	green
Croceibacter	-0.0452779	0.0166229	1	green
Cupriavidus	-0.00467963	-0.00451707	1	green
Cytophaga	-0.000897944	0.025688	1	green
Desulfatibacillum	-0.020727	0.00516614	1	green
Desulfovibrio	0.0245076	0.0178105	1	green
Dorea	0.12058	0.385277	1	green
Dyadobacter	-0.00664248	0.0201956	1	green
Eggerthella	-0.048281	-0.0678511	1	green
Eikenella	-0.12472	0.0638232	1	green
Elizabethkingia	0.12058	0.385277	1	green
Eremococcus	-0.262405	-0.24054	1	green
Erysipelothrix	-0.262405	-0.24054	1	green
Ferrimonas	-0.0778617	0.0610129	1	green
Filifactor	0.12058	0.385277	1	green
Flavobacterium	-0.0239521	0.0362854	1	green
Flexithrix	-0.262405	-0.24054	1	green
Fusobacterium	-0.10342	0.0956652	1	green
Gemella	-0.131009	0.106308	1	green
Geobacter	0.0159667	0.0241772	1	green
Gordonibacter	-0.0778617	0.0610129	1	green
Granulicatella	-0.262405	-0.24054	1	green
Halomicrobium	-0.262405	-0.24054	1	green
Halorubrum	-0.105409	0.173885	1	green
Heliobacillus	-0.262405	-0.24054	1	green
Herbaspirillum	0.0282173	0.0301186	1	green
Herminiimonas	0.0292085	0.0436318	1	green
Holdemania	-0.262405	-0.24054	1	green
Hyphomicrobium	0.00348332	0.0217532	1	green
Klebsiella	0.0240172	0.0475074	1	green
Kocuria	-0.0580587	-0.0227531	1	green
Leadbetterella	-0.017048	0.0249953	1	green
Leeuwenhoekiella	-0.0127507	0.0127241	1	green
Leifsonia	-0.000623519	-0.00667198	1	green
Leptospira	-0.00745866	0.0180933	1	green
Leptothrix	-0.0163426	0.0261768	1	green
Lutiella	0.0398037	0.0772142	1	green
Lymphocryptovirus	0.12058	0.385277	1	green
Lysinibacillus	-0.0342267	0.132315	1	green
Mannheimia	-0.262405	-0.24054	1	green
Maribacter	-0.0105848	0.0285981	1	green
Marinobacter	-0.0112398	0.0104842	1	green
Marinomonas	0.0540737	-0.0162816	1	green
Methanocaldococcus	-0.262405	-0.24054	1	green
Methanoregula	-0.262405	-0.24054	1	green
Methanothermus	-0.262405	-0.24054	1	green
Methylibium	-0.0214162	0.0271637	1	green
Methylophaga	-0.131119	0.160552	1	green
Microbacterium	-0.136527	0.16861	1	green
Microscilla	-0.0272462	0.0568628	1	green
Moorella	-0.181021	0.000649707	1	green
Mucilaginibacter	0.000857504	0.0136317	1	green
Nakamurella	-0.0329905	0.00676672	1	green
Nanoarchaeum	0.12058	0.385277	1	green
Nautilia	-0.262405	-0.24054	1	green
Nitrosomonas	-0.0164288	0.0141849	1	green
Oenococcus	-0.262405	-0.24054	1	green
Paludibacter	-0.0180005	0.0289108	1	green
Pantoea	0.010764	0.0108791	1	green
Parachlamydia	0.0540444	0.0132619	1	green
Pasteuria	0.363585	0.0771513	1	green
Pedobacter	-0.0142367	0.00755658	1	green
Persephonella	0.195092	0.0108719	1	green
Phascolarctobacterium	0.12058	0.385277	1	green
Pirellula	0.0186889	0.0307995	1	green
Planctomyces	-0.0760198	0.0237413	1	green
Planococcus	-0.213053	0.0431784	1	green
Polaribacter	-0.0294706	0.0130816	1	green
Prevotella	-0.0572503	0.0376888	1	green
Prosthecobacter	0.12058	0.385277	1	green
Providencia	-0.0702764	0.00649491	1	green
Pseudomonas	0.00400079	0.00414865	1	green
Pseudoramibacter	0.12058	0.385277	1	green
Pseudovibrio	0.0147794	-0.00519733	1	green
Pyrobaculum	-0.262405	-0.24054	1	green
Ralstonia	0.00528654	0.00680042	1	green
Riemerella	-0.0673037	0.0395957	1	green
Ruegeria	-0.0895884	0.0122806	1	green
Saccharophagus	0.0668878	0.0226368	1	green
Salinibacter	-0.115296	0.0866386	1	green
Sanguibacter	-0.0173343	0.00798395	1	green
Serratia	-0.0108198	0.00365954	1	green
Sphingobacterium	-0.0187988	0.0132304	1	green
Spirosoma	-0.0125488	0.0255018	1	green
Sterolibacterium	0.12058	0.385277	1	green
Stigmatella	-0.271655	-0.249899	1	green
Sulfurospirillum	-0.0315972	0.136611	1	green
Syntrophus	0.112049	-0.0172834	1	green
Tannerella	-0.262405	-0.24054	1	green
Thermanaerovibrio	-0.0342267	0.132315	1	green
Thermobispora	-0.0755605	-0.0515964	1	green
Thermotoga	0.0455788	0.0180105	1	green
Thermovibrio	-0.146278	-0.0444137	1	green
Thiomicrospira	-0.0946658	-0.00915638	1	green
Tropheryma	-0.00742237	-0.0198049	1	green
Tsukamurella	-0.051984	-0.0237319	1	green
Vibrio	-0.00104925	0.0106551	1	green
Vulcanisaeta	-0.262405	-0.24054	1	green
Weeksella	-0.012289	0.0416428	1	green
Weissella	0.12058	0.385277	1	green
Acaryochloris	0.000138297	0.0639244	2	purple
Acetobacter	0.073687	0.0019685	2	purple
Acetohalobium	0.0713782	-0.0273026	2	purple
Alicycliphilus	0.0247854	0.0489821	2	purple
Aliivibrio	0.223854	0.254328	2	purple
Alteromonas	0.13804	-0.0147368	2	purple
Anaerobaculum	0.31767	0.135371	2	purple
Arsenophonus	0.150685	-0.0990818	2	purple
Azoarcus	0.0227713	0.0177165	2	purple
Azorhizobium	0.0718443	-0.0194176	2	purple
Azospirillum	0.0684136	0.0208985	2	purple
Bacillus	-0.0124899	0.0510148	2	purple
Bergeyella	-0.000794123	0.381637	2	purple
Bermanella	0.282472	0.180002	2	purple
Brucella	0.0833661	0.00922423	2	purple
Calditerrivibrio	0.207761	0.183174	2	purple
Cardiobacterium	0.0949565	0.177324	2	purple
Cellvibrio	0.0914547	0.00683327	2	purple
Chelativorans	0.148555	0.102574	2	purple
Chlorobium	0.027568	0.0390993	2	purple
Collimonas	0.082327	0.182369	2	purple
Cronobacter	0.0698537	0.0798177	2	purple
Dinoroseobacter	0.0464345	-0.0154959	2	purple
Dolichospermum	0.11772	0.288699	2	purple
Elusimicrobium	0.12058	0.385277	2	purple
Endoriftia	0.123664	0.0403166	2	purple
Flammeovirga	0.0355707	0.382728	2	purple
Haladaptatus	-0.0462361	0.259904	2	purple
Haloterrigena	0.335401	0.112889	2	purple
Halothiobacillus	0.16482	0.220063	2	purple
Helicobacter	0.0296032	0.0709244	2	purple
Ilyobacter	0.12058	0.385277	2	purple
Janthinobacterium	0.0912903	0.0432329	2	purple
Jonquetella	0.12058	0.385277	2	purple
Kingella	0.154857	0.129466	2	purple
Magnetospirillum	0.0772368	0.041365	2	purple
Mariprofundus	0.176245	0.0902323	2	purple
Methanoculleus	0.12058	0.385277	2	purple
Methanosaeta	0.0403442	0.382871	2	purple
Methyloversatilis	0.00644075	0.381854	2	purple
Myxococcus	-0.0112728	0.0551647	2	purple
Nitrosospira	0.0751025	0.00352558	2	purple
Opitutus	0.0405297	0.00925272	2	purple
Parvularcula	0.117089	0.102694	2	purple
Pasteurella	0.145642	0.291684	2	purple
Pelodictyon	0.124284	-0.0226004	2	purple
Phaeobacter	0.16687	0.178351	2	purple
Pseudoalteromonas	0.0187719	0.0771617	2	purple
Rahnella	0.12058	0.385277	2	purple
Rhizobium	0.0907406	0.00285086	2	purple
Rhodobacter	0.0925438	0.0930495	2	purple
Rhodopseudomonas	0.0557252	-0.0143539	2	purple
Rhodothermus	0.00719234	0.0311137	2	purple
Robiginitalea	0.0138119	0.0464848	2	purple
Sorangium	0.0839701	-0.0348362	2	purple
Sulfurovum	0.12058	0.385277	2	purple
Xanthomonas	0.0705107	0.00749154	2	purple
Acetivibrio	0.324131	0.127178	3	red
Acidobacterium	0.121901	0.0464677	3	red
Ahrensia	0.417383	0.00893762	3	red
Aurantimonas	0.216486	-0.0548704	3	red
Brevundimonas	0.221519	0.105137	3	red
Chlamydophila	0.488493	-0.233389	3	red
Chloroherpeton	0.176692	0.0750015	3	red
Citromicrobium	0.141648	-0.0769658	3	red
Desulfobulbus	0.245583	0.140799	3	red
Desulfomicrobium	0.220969	0.00414289	3	red
Erythrobacter	0.16535	-0.00470953	3	red
Gemmata	0.169471	0.0173723	3	red
Gluconacetobacter	0.331351	-0.0420824	3	red
Hahella	0.115571	-0.0576938	3	red
Haliangium	0.0919782	0.0208253	3	red
Limnobacter	0.343125	0.103094	3	red
Methylobacter	0.0664186	0.0912997	3	red
Oceanicola	0.209076	-0.0612328	3	red
Ochrobactrum	0.133022	0.0338957	3	red
Paracoccus	0.25516	-0.161113	3	red
Pelobacter	0.100293	0.0581013	3	red
Photobacterium	0.174536	0.143982	3	red
Prosthecochloris	0.144428	0.0302268	3	red
Psychroflexus	0.267951	0.0890364	3	red
Sebaldella	0.31767	0.135371	3	red
Sphingobium	0.159224	-0.0257265	3	red
Sphingomonas	0.180533	-0.0192124	3	red
Sphingopyxis	0.382581	-0.0675733	3	red
Synechocystis	0.0325157	0.122081	3	red
Terriglobus	0.262384	0.102597	3	red
Thermomicrobium	0.492101	-0.0858034	3	red
Victivallis	0.295107	0.124264	3	red
Xanthobacter	0.123689	-0.0374243	3	red
Yersinia	0.133367	0.106847	3	red
Zunongwangia	0.0713412	0.115127	3	red
Achromobacter	0.0262228	-0.00795702	4	blue
Acidaminococcus	-0.262433	-0.158219	4	blue
Acidimicrobium	-0.310792	-0.289495	4	blue
Acidovorax	-0.0435425	0.00045081	4	blue
Actinobacillus	0.0652616	-0.0593091	4	blue
Actinomyces	-0.0614941	-0.0146001	4	blue
Actinoplanes	-0.310792	-0.289495	4	blue
Actinosynnema	-0.127637	-0.0754018	4	blue
Aeromicrobium	-0.169756	0.0262509	4	blue
Aeropyrum	-0.0961055	-0.12272	4	blue
Albidiferax	-0.0516591	-0.257191	4	blue
Alkaliphilus	0.131587	-0.0421488	4	blue
Allochromatium	0.0680554	0.0359016	4	blue
Aminomonas	-0.240499	-0.0489603	4	blue
Amycolatopsis	-0.061899	-0.220585	4	blue
Anaerococcus	-0.230314	0.0141631	4	blue
Anaerolinea	-0.258517	-0.119991	4	blue
Anaeromyxobacter	0.0242192	-0.00255391	4	blue
Anaplasma	-0.0419821	-0.138786	4	blue
Aromatoleum	-0.0103076	-0.102403	4	blue
Arthrobacter	-0.0507977	-0.0590502	4	blue
Asticcacaulis	0.173332	-0.0657274	4	blue
Bartonella	-0.0429135	-0.0325142	4	blue
Bdellovibrio	-0.0692181	0.0058397	4	blue
Blastochloris	-0.310792	-0.289495	4	blue
Blautia	-0.166996	0.0608413	4	blue
Brachybacterium	-0.104013	-0.0308545	4	blue
Brevibacillus	-0.310792	-0.289495	4	blue
Brevibacterium	-0.0742118	-0.055013	4	blue
Burkholderia	9.47293e-05	-0.00204077	4	blue
Butyrivibrio	0.00671826	-0.125575	4	blue
Caldicellulosiruptor	-0.060419	-0.18426	4	blue
Carboxydothermus	0.0264793	-0.0587625	4	blue
Catonella	-0.288721	-0.267165	4	blue
Cellulomonas	-0.063383	-0.0185123	4	blue
Chitinophaga	-0.00229923	-0.0215784	4	blue
Chloriridovirus	-0.310792	-0.289495	4	blue
Chloroflexus	-0.0184821	-0.0699869	4	blue
Chromobacterium	0.0299306	0.0113548	4	blue
Chromohalobacter	-0.119061	-0.199857	4	blue
Citrobacter	-0.11015	0.135116	4	blue
Clavibacter	-0.051204	0.0191802	4	blue
Clostridium	0.0133188	-0.0363093	4	blue
Collinsella	-0.0927167	-0.122413	4	blue
Conexibacter	-0.164381	-0.149338	4	blue
Congregibacter	-0.183534	-0.0306653	4	blue
Coprococcus	-0.0479287	0.121688	4	blue
Corynebacterium	-0.050121	-0.021727	4	blue
Curvibacter	-0.0357894	0.00928311	4	blue
Cyanobium	-0.265706	-0.146723	4	blue
Dechloromonas	0.0254933	-0.0360118	4	blue
Deinococcus	0.0387026	-0.124969	4	blue
Delftia	-0.0449407	0.0189871	4	blue
Dermacoccus	-0.0230031	0.0496694	4	blue
Desulfitobacterium	-0.154848	-0.0927643	4	blue
Desulfohalobium	0.0726433	-0.108909	4	blue
Desulfotomaculum	-0.0843911	-0.0964161	4	blue
Dickeya	-0.0888197	0.029837	4	blue
Dietzia	-0.101153	-0.259142	4	blue
Ehrlichia	-0.121768	0.00618513	4	blue
Enterococcus	-0.163787	0.0421736	4	blue
Erwinia	-0.0443335	-0.0699211	4	blue
Francisella	0.0768679	-0.04469	4	blue
Frankia	-0.0491278	-0.0368876	4	blue
Gallionella	-0.124937	-0.0443512	4	blue
Gardnerella	-0.0404793	-0.0931466	4	blue
Geobacillus	0.017876	0.0131017	4	blue
Geodermatophilus	-0.088257	-0.0192851	4	blue
Gordonia	-0.0411399	-0.0241746	4	blue
Gramella	-0.0311667	0.0581987	4	blue
Halanaerobium	-0.291472	-0.269949	4	blue
Halobacterium	-0.310792	-0.289495	4	blue
Halomonas	-0.258318	-0.065024	4	blue
Herpetosiphon	-0.0199029	-0.112532	4	blue
Hirschia	0.0468668	-0.0559139	4	blue
Hoeflea	-0.0431446	0.129171	4	blue
Hydrogenobaculum	0.123362	-0.0534539	4	blue
Hydrogenophaga	-0.310792	-0.289495	4	blue
Idiomarina	-0.104023	-0.110063	4	blue
Intrasporangium	-0.0662458	-0.258165	4	blue
Iridovirus	-0.130649	-0.0111941	4	blue
Isosphaera	-0.0124159	-0.0429925	4	blue
Janibacter	-0.121732	-0.0323021	4	blue
Jonesia	-0.0826288	-0.0588703	4	blue
Kangiella	-0.0353271	0.0695899	4	blue
Kineococcus	-0.0485811	-0.0120577	4	blue
Kitasatospora	-0.172148	0.0156905	4	blue
Kordia	-0.0116155	0.0158554	4	blue
Kribbella	-0.115761	-0.0876898	4	blue
Ktedonobacter	-0.0599387	-0.141305	4	blue
Kytococcus	-0.0864011	-0.0813595	4	blue
Labrenzia	0.0434596	-0.0611579	4	blue
Lautropia	0.0687397	-0.0696872	4	blue
Legionella	0.0263955	0.0280048	4	blue
Leptospirillum	0.116548	-0.0912624	4	blue
Leuconostoc	-0.124027	-0.178006	4	blue
Listeria	0.092971	0.0210544	4	blue
Maricaulis	-0.0272665	-0.255045	4	blue
Maritimibacter	0.196576	-0.0854757	4	blue
Megasphaera	-0.18948	-0.0508397	4	blue
Mesorhizobium	0.0316172	-0.0201432	4	blue
Methanoplanus	-0.310792	-0.289495	4	blue
Methanothermobacter	-0.24479	-0.0555598	4	blue
Methylococcus	0.0448834	-0.0153184	4	blue
Methylosinus	-0.152276	-0.0504302	4	blue
Micromonospora	-0.128121	0.00607163	4	blue
Mitsuokella	-0.189763	-0.100176	4	blue
Mycobacterium	-0.0471355	-0.0200998	4	blue
Natrialba	0.19597	-0.25791	4	blue
Neisseria	0.00516077	-0.0492703	4	blue
Neptuniibacter	-0.292694	-0.271185	4	blue
Nitrosococcus	0.0598224	-0.0372852	4	blue
Nitrospira	-0.10464	0.0329781	4	blue
Nocardia	-0.0860745	-0.0129453	4	blue
Nocardioides	-0.056351	-0.0199808	4	blue
Nocardiopsis	-0.111271	-0.0687332	4	blue
Oceanicaulis	0.107214	-0.193188	4	blue
Oceanithermus	0.0239146	-0.176356	4	blue
Ornithobacterium	-0.310792	-0.289495	4	blue
Paenibacillus	-0.0470144	-0.0392665	4	blue
Parabacteroides	-0.0516444	0.000480497	4	blue
Peptostreptococcus	-0.237011	0.026119	4	blue
Photorhabdus	-0.00967518	-0.018415	4	blue
Polaromonas	-0.0359876	-0.003005	4	blue
Prasinovirus	-0.000811911	-0.0648876	4	blue
Prochlorococcus	-0.0817682	-0.0994435	4	blue
Propionibacterium	-0.0506123	-0.0220768	4	blue
Pyramidobacter	-0.0479287	0.121688	4	blue
Pyrococcus	-0.254383	-0.0481932	4	blue
Renibacterium	-0.0352764	-0.0459445	4	blue
Rhodococcus	-0.0710507	-0.0323431	4	blue
Rhodomicrobium	0.00375741	-0.254642	4	blue
Rickettsia	-0.0675242	-0.0365376	4	blue
Roseobacter	0.0511407	-0.109045	4	blue
Roseovarius	0.0302122	-0.0846913	4	blue
Rothia	-0.0732431	-0.0200682	4	blue
Rubrivivax	-0.0231853	0.00840267	4	blue
Rubrobacter	-0.110235	-0.16897	4	blue
Saccharomonospora	-0.0521027	-0.0376836	4	blue
Saccharopolyspora	-0.132169	-0.0500564	4	blue
Sagittula	-0.288721	-0.267165	4	blue
Salinispora	-0.0967308	-0.0243101	4	blue
Segniliparus	-0.17057	0.0192529	4	blue
Selenomonas	-0.164523	0.0893958	4	blue
Shewanella	-0.0246286	0.00356254	4	blue
Sodalis	0.0392183	-0.0693029	4	blue
Sphaerobacter	-0.0281213	-0.182936	4	blue
Spirochaeta	-0.0491128	-0.131305	4	blue
Stackebrandtia	-0.0483361	-0.126325	4	blue
Staphylococcus	-0.04794	-0.0559172	4	blue
Stenotrophomonas	-0.0344352	-0.137679	4	blue
Streptococcus	-0.0950848	-0.0202007	4	blue
Streptomyces	-0.0477056	-0.0109807	4	blue
Streptosporangium	-0.0555885	-0.0342969	4	blue
Sutterella	0.0156077	-0.0272106	4	blue
Symbiobacterium	-0.01735	-0.255963	4	blue
Synechococcus	-0.128294	0.00144623	4	blue
Syntrophomonas	-0.142406	0.11131	4	blue
Taylorella	-0.0536189	0.112787	4	blue
Teredinibacter	-0.0985917	-0.276269	4	blue
Terrimonas	0.0998182	-0.0662541	4	blue
Thermaerobacter	-0.107519	-0.171143	4	blue
Thermoanaerobacter	-0.152352	0.0580703	4	blue
Thermoanaerobacterium	-0.267918	-0.157447	4	blue
Thermobaculum	-0.135446	-0.0250391	4	blue
Thermobifida	-0.08374	-0.0812714	4	blue
Thermococcus	-0.296496	-0.275031	4	blue
Thermodesulfovibrio	0.090704	-0.264471	4	blue
Thermomonospora	-0.111682	-0.0185014	4	blue
Thermoproteus	-0.288721	-0.267165	4	blue
Thermosediminibacter	-0.0968222	0.0452065	4	blue
Thermosinus	-0.310792	-0.289495	4	blue
Thermosipho	-0.121768	0.00618513	4	blue
Thiocapsa	0.130064	-0.13395	4	blue
Thiomonas	-0.00122763	-0.141009	4	blue
Treponema	-0.0903043	-0.125471	4	blue
Turicibacter	-0.310792	-0.289495	4	blue
Variovorax	-0.025356	0.0010428	4	blue
Veillonella	-0.129864	-0.19374	4	blue
Verminephrobacter	-0.0286259	0.00633663	4	blue
Wolinella	0.11055	-0.263234	4	blue
Xylanimonas	-0.0875936	-0.0243564	4	blue
Acidiphilium	0.1338	-0.0142007	5	grey
Acidithiomicrobium	0.6076	-0.232254	5	grey
Afipia	0.114675	-0.248087	5	grey
Agrobacterium	0.039873	-0.0178033	5	grey
Alcanivorax	0.387622	-0.245965	5	grey
Alicyclobacillus	0.0276134	-0.119764	5	grey
Ammonifex	0.353841	-0.0295129	5	grey
Anoxybacillus	0.6076	-0.232254	5	grey
Archaeoglobus	0.210365	-0.236038	5	grey
Asaia	0.6076	-0.232254	5	grey
Basfia	0.0584634	-0.237484	5	grey
Beijerinckia	0.247082	-0.245194	5	grey
Bradyrhizobium	0.0363235	-0.0261431	5	grey
Caldanaerobacter	0.6076	-0.232254	5	grey
Caminibacter	0.6076	-0.232254	5	grey
Caulobacter	0.104685	-0.0454394	5	grey
Cellulosilyticum	0.6076	-0.232254	5	grey
Chlorovirus	0.6076	-0.232254	5	grey
Citreicella	0.306845	-0.235119	5	grey
Deferribacter	0.6076	-0.232254	5	grey
Dehalococcoides	0.0708921	-0.207996	5	grey
Dethiosulfovibrio	0.130361	-0.121383	5	grey
Enhydrobacter	0.6076	-0.232254	5	grey
Ethanoligenens	0.0129517	-0.237918	5	grey
Ferroglobus	0.6076	-0.232254	5	grey
Fulvimarina	0.319136	-0.0982792	5	grey
Gluconobacter	0.165275	-0.0872838	5	grey
Granulibacter	0.214693	-0.104854	5	grey
Halorhodospira	0.0904141	-0.24765	5	grey
Hyphomonas	0.271084	-0.111134	5	grey
Jannaschia	0.211095	-0.236031	5	grey
Ketogulonicigenium	0.151965	-0.250878	5	grey
Lactobacillus	0.0422253	-0.172045	5	grey
Loktanella	0.296812	-0.0170735	5	grey
Methanocella	0.6076	-0.232254	5	grey
Methylobacterium	0.0744977	-0.0173498	5	grey
Methylocella	0.169485	-0.0926736	5	grey
Methylocystis	0.101053	-0.128815	5	grey
Methylotenera	0.6076	-0.232254	5	grey
Methylovorus	0.6076	-0.232254	5	grey
Micrococcus	0.26687	-0.253491	5	grey
Mimivirus	0.6076	-0.232254	5	grey
Neorickettsia	0.223381	-0.235914	5	grey
Nitrobacter	0.0673461	-0.0907775	5	grey
Nitrococcus	0.0948246	-0.0601591	5	grey
Novosphingobium	0.1693	-0.0844991	5	grey
Oceanibulbus	0.336214	-0.0154299	5	grey
Octadecabacter	0.6076	-0.232254	5	grey
Oligotropha	0.190575	-0.131826	5	grey
Orientia	0.6076	-0.232254	5	grey
Orthopoxvirus	0.6076	-0.232254	5	grey
Pandoraea	0.6076	-0.232254	5	grey
Parvibaculum	0.0831808	-0.0877455	5	grey
Pediococcus	0.255066	-0.235612	5	grey
Phaeovirus	0.6076	-0.232254	5	grey
Pimelobacter	0.0129517	-0.237918	5	grey
Polynucleobacter	0.109965	-0.047924	5	grey
Rhodospirillum	0.0670519	-0.039196	5	grey
Roseibium	0.6076	-0.232254	5	grey
Roseiflexus	0.0486064	-0.105151	5	grey
Roseomonas	0.0723353	-0.0360247	5	grey
Sideroxydans	0.6076	-0.232254	5	grey
Sinorhizobium	0.0327896	-0.016766	5	grey
Solobacterium	0.155911	-0.236556	5	grey
Spiroplasma	0.155911	-0.236556	5	grey
Starkeya	0.0429947	-0.0152909	5	grey
Subdoligranulum	0.6076	-0.232254	5	grey
Sulfitobacter	0.342959	-0.0819331	5	grey
Syntrophothermus	0.404495	0.0252789	5	grey
Thermofilum	0.6076	-0.232254	5	grey
Thermus	0.00506179	-0.110774	5	grey
Thiobacillus	0.0415952	-0.0413991	5	grey
Waddlia	0.490438	-0.0836954	5	grey
Xenorhabdus	0.6076	-0.232254	5	grey
Zymomonas	0.233393	-0.0862684	5	grey
Acidithiobacillus	-0.0220522	0.0824037	6	orange
Aciduliprofundum	-0.154983	0.377013	6	orange
Aggregatibacter	-0.0862048	0.21639	6	orange
Algoriphagus	-0.0245462	0.0605242	6	orange
Aquifex	-0.154983	0.377013	6	orange
Beggiatoa	0.00616134	0.0979268	6	orange
Blattabacterium	-0.111695	0.189667	6	orange
Buchnera	-0.0716405	0.379513	6	orange
Candidatus	-0.0248997	0.032269	6	orange
Catenibacterium	-0.154983	0.377013	6	orange
Coccolithovirus	0.0137028	0.186057	6	orange
Comamonas	-0.0329841	0.0338628	6	orange
Desulfarculus	-0.177157	0.249541	6	orange
Desulfurivibrio	-0.0805256	0.235679	6	orange
Dictyoglomus	-0.154983	0.377013	6	orange
Dokdonia	-0.119977	0.125588	6	orange
Edwardsiella	0.00452462	0.381797	6	orange
Enterobacter	-0.0168795	0.0738405	6	orange
Eubacterium	-0.0746645	0.080135	6	orange
Exiguobacterium	0.00452462	0.381797	6	orange
Finegoldia	-0.154983	0.377013	6	orange
Flexibacter	-0.154983	0.377013	6	orange
Gloeobacter	-0.0424642	0.0740595	6	orange
Haemophilus	-0.0765736	0.18794	6	orange
Halorhabdus	-0.154983	0.377013	6	orange
Histophilus	-0.154983	0.377013	6	orange
Kinetoplastibacterium	-0.154983	0.377013	6	orange
Lechevalieria	-0.154983	0.377013	6	orange
Lyngbya	-0.0906719	0.227263	6	orange
Marivirga	-0.0122449	0.0569181	6	orange
Mesoplasma	-0.154983	0.377013	6	orange
Methylomonas	-0.154983	0.377013	6	orange
Mobiluncus	-0.154983	0.377013	6	orange
Moraxella	-0.139289	0.118826	6	orange
Mycoplasma	-0.101448	0.0393259	6	orange
Natranaerobius	-0.154983	0.377013	6	orange
Natronomonas	-0.0575342	0.379936	6	orange
Nesterenkonia	-0.154983	0.377013	6	orange
Olsenella	-0.154983	0.377013	6	orange
Oxalobacter	-0.00136169	0.115951	6	orange
Pectobacterium	-0.196764	0.136821	6	orange
Petrotoga	-0.154983	0.377013	6	orange
Proteus	-0.0716405	0.379513	6	orange
Psychrobacter	-0.0466043	0.0291062	6	orange
Raphidiopsis	-0.0422058	0.13613	6	orange
Rhodopirellula	-0.0247074	0.0548155	6	orange
Roseburia	-0.154983	0.377013	6	orange
Shuttleworthia	-0.154983	0.377013	6	orange
Succinatimonas	-0.0984433	0.229631	6	orange
Suipoxvirus	-0.0575342	0.379936	6	orange
Sulfolobus	-0.154983	0.377013	6	orange
Sulfuricurvum	-0.154983	0.377013	6	orange
Sulfurimonas	-0.0427452	0.380379	6	orange
Thauera	-0.0813331	0.228193	6	orange
Thermincola	-0.189141	0.180644	6	orange
Thermocrinis	-0.0270044	0.380851	6	orange
Thermosphaera	-0.154983	0.377013	6	orange
Thermosynechococcus	-0.123096	0.237677	6	orange
Thioalkalivibrio	-0.0997998	0.0709037	6	orange
Truepera	-0.154983	0.377013	6	orange
Wolbachia	-0.181767	0.223036	6	orange
Aeromonas	0.0616508	0.0464878	7	grey2
Arcobacter	0.0323172	0.117245	7	grey2
Chlorobaculum	-0.0864161	0.0340364	7	grey2
Dehalogenimonas	0.0734537	-0.237342	7	grey2
Desulfonatronospira	0.0433447	0.0902989	7	grey2
Desulfotalea	-0.0388478	0.124764	7	grey2
Desulfuromonas	-0.0146773	-0.0272634	7	grey2
Escherichia	0.0466671	0.00845594	7	grey2
Fervidobacterium	0.0128645	0.00470793	7	grey2
Gemmatimonas	-0.107426	0.107995	7	grey2
Lactococcus	0.00432138	-0.0228694	7	grey2
Meiothermus	0.0711742	0.0356411	7	grey2
Oribacterium	0.0202329	-0.0223973	7	grey2
Phenylobacterium	0.0544415	-0.167777	7	grey2
Plesiocystis	0.00916709	-0.112325	7	grey2
Porphyromonas	0.0067834	0.0229502	7	grey2
Pseudoxanthomonas	-0.262405	-0.24054	7	grey2
Psychromonas	-0.158016	0.0566687	7	grey2
Reinekea	-0.0805531	-0.238808	7	grey2
Ruminococcus	0.0916186	0.087131	7	grey2
Shigella	0.0716732	-0.0361714	7	grey2
Syntrophobacter	0.103241	-0.0293698	7	grey2
Tolumonas	-0.0920351	0.0378527	7	grey2
Anabaena	0.0112344	0.212468	8	purple
Anaerotruncus	-0.0270044	0.380851	8	purple
Aphanizomenon	-0.037138	0.380547	8	purple
Arthrospira	0.00828253	0.116652	8	purple
Bilophila	-0.201407	0.11013	8	purple
Colwellia	0.0908695	0.281067	8	purple
Coraliomargarita	-0.154983	0.377013	8	purple
Crocosphaera	-0.0620613	0.315252	8	purple
Cyanothece	0.00739189	0.169556	8	purple
Cylindrospermopsis	-0.0236977	0.38095	8	purple
Dactylosporangium	-0.105409	0.173885	8	purple
Denitrovibrio	0.00263458	0.149687	8	purple
Dialister	-0.105666	0.0969609	8	purple
Epulopiscium	-0.0391055	0.380488	8	purple
Faecalibacterium	-0.0232215	0.380964	8	purple
Fibrobacter	-0.0343248	0.380632	8	purple
Laribacter	-0.119114	0.164783	8	purple
Leptotrichia	-0.0479415	0.380223	8	purple
Methanosarcina	-0.0599097	0.302993	8	purple
Methanosphaera	-0.08064	0.285578	8	purple
Microcoleus	0.0886345	0.266592	8	purple
Microcystis	-0.0596981	0.305964	8	purple
Nitratifractor	0.110911	0.164577	8	purple
Nodularia	-0.0491937	0.333803	8	purple
Nostoc	-0.0232306	0.143828	8	purple
Oscillatoria	0.0719608	0.284791	8	purple
Oscillochloris	-0.016763	0.381158	8	purple
Salmonella	0.0687837	0.131774	8	purple
Trichodesmium	0.0246788	0.244533	8	purple

## Sheet: NMDS_Proteobactia_Genus_Coord.
Genus	NMDS1	NMDS2	cluster	colors
Unclassified Campylobacterales	0.296326	0.168122	1	blue
Unclassified Hyphomonadaceae	0.287334	0.119875	1	blue
Wolinella	0.280113	0.0811257	1	blue
Ketogulonicigenium	0.259112	0.031156	1	blue
Unclassified Rhodobacterales	0.253248	-0.0630248	1	blue
Oceanicaulis	0.248203	-0.0510437	1	blue
Rhodomicrobium	0.229932	-0.0954922	1	blue
Candidatus Puniceispirillum	0.227991	-0.115861	1	blue
Albidiferax	0.219847	-0.146015	1	blue
Maricaulis	0.214378	-0.164129	1	blue
Teredinibacter	0.21227	-0.2829	1	blue
Thiomonas	0.185008	-0.0774473	1	blue
Sagittula	0.180753	-0.336754	1	blue
Unclassified Oceanospirillales	0.18043	-0.352938	1	blue
Neptuniibacter	0.180286	-0.360117	1	blue
Unclassified Phyllobacteriaceae	0.179841	-0.382421	1	blue
Bdellovibrio	0.178578	-0.126171	1	blue
Blastochloris	0.178173	-0.465854	1	blue
Unclassified unclassified derived from Alphaproteobacteria	0.178173	-0.465854	1	blue
Hydrogenophaga	0.178173	-0.465854	1	blue
Unclassified Campylobacteraceae	0.178173	-0.465854	1	blue
Unclassified Methylococcaceae	0.178173	-0.465854	1	blue
Stenotrophomonas	0.177506	-0.0962454	1	blue
Aromatoleum	0.168555	-0.0739155	1	blue
Hirschia	0.15794	-0.0539308	1	blue
Unclassified Moraxellaceae	0.141656	-0.262212	1	blue
Sutterella	0.141126	-0.0743579	1	blue
Halomonas	0.109508	-0.344006	1	blue
Thiomicrospira	0.107778	-0.23101	1	blue
Dechloromonas	0.103634	-0.0534022	1	blue
Unclassified Gallionellaceae	0.0804795	-0.292495	1	blue
Mesorhizobium	0.0706366	-0.0359406	1	blue
Campylobacter	0.0693075	-0.0372659	1	blue
Gallionella	0.0687896	-0.15178	1	blue
Photorhabdus	0.067174	-0.0822595	1	blue
Roseobacter	0.0629728	-0.00882171	1	blue
Anaeromyxobacter	0.0516413	-0.0541351	1	blue
Bradyrhizobium	0.0474498	-0.0167726	1	blue
Ralstonia	0.0466234	-0.0507937	1	blue
Cupriavidus	0.0397408	-0.0599113	1	blue
Bordetella	0.0390313	-0.0521535	1	blue
Roseovarius	0.036241	-0.045752	1	blue
Polaromonas	0.034909	-0.0907355	1	blue
Verminephrobacter	0.0341023	-0.0837606	1	blue
Acidovorax	0.0333081	-0.0994885	1	blue
Burkholderia	0.0328357	-0.0613695	1	blue
Agrobacterium	0.0318566	-0.0158646	1	blue
Idiomarina	0.031251	-0.362756	1	blue
Chromobacterium	0.0284793	-0.0194795	1	blue
Shewanella	0.0272722	-0.109383	1	blue
Pseudomonas	0.0264373	-0.0391018	1	blue
Legionella	0.0250161	-0.0512341	1	blue
Nitrosomonas	0.0210534	-0.0629562	1	blue
Delftia	0.0172797	-0.0971483	1	blue
Neisseria	0.0155403	-0.0548952	1	blue
Chromohalobacter	0.0125738	-0.305323	1	blue
Acinetobacter	0.0121703	-0.0673057	1	blue
Actinobacillus	0.0106265	-0.0596345	1	blue
Herminiimonas	0.00969261	-0.0191526	1	blue
Leptothrix	0.00293834	-0.0630876	1	blue
Francisella	0.00219731	-0.0107025	1	blue
Methylibium	0.00102988	-0.0715668	1	blue
Methylococcus	-0.00922927	-0.0107057	1	blue
Bartonella	-0.0096509	-0.0916281	1	blue
Saccharophagus	-0.0142176	-0.0014866	1	blue
Syntrophus	-0.0152282	0.0476335	1	blue
Asticcacaulis	-0.038636	0.0738115	1	blue
Desulfohalobium	-0.0617146	-0.040537	1	blue
Kangiella	-0.0652233	-0.0948962	1	blue
Congregibacter	-0.0745639	-0.174527	1	blue
Achromobacter	-0.0801392	-0.0158659	1	blue
Maritimibacter	-0.0803237	0.0878471	1	blue
Candidatus Pelagibacter	-0.0844077	-0.114934	1	blue
unclassified derived from Rickettsiales	-0.0868567	-0.117706	1	blue
Klebsiella	-0.0882382	0.000114054	1	blue
Allochromatium	-0.102508	0.00918769	1	blue
Unclassified unclassified derived from Rickettsiales	-0.104771	-0.150288	1	blue
Methylosinus	-0.165915	-0.138134	1	blue
Unclassified Rickettsiales	-0.207808	-0.130694	1	blue
Ehrlichia	-0.265142	-0.154771	1	blue
unclassified derived from Campylobacterales	-0.315728	-0.119274	1	blue
Taylorella	-0.399659	-0.0603776	1	blue
Hoeflea	-0.419339	-0.0465676	1	blue
Escherichia	0.0172432	0.00910377	2	purple
Sodalis	-0.0183805	0.121464	2	purple
Alicycliphilus	-0.101871	0.0240109	2	purple
Ochrobactrum	-0.108025	0.0513028	2	purple
Unclassified Alteromonadales	-0.128306	0.0917486	2	purple
Unclassified Ectothiorhodospiraceae	-0.131966	0.117107	2	purple
Methylobacter	-0.14019	0.0826119	2	purple
Unclassified Pseudomonadales	-0.147749	0.0545306	2	purple
Unclassified Xanthobacteraceae	-0.158779	0.365649	2	purple
Unclassified Pasteurellaceae	-0.173967	0.0738687	2	purple
Unclassified Pseudomonadaceae	-0.175657	0.117646	2	purple
Arcobacter	-0.176559	0.0616047	2	purple
Desulfonatronospira	-0.189197	0.0692373	2	purple
Ahrensia	-0.209639	0.345125	2	purple
Marinomonas	-0.239926	0.145519	2	purple
Candidatus Accumulibacter	-0.241306	0.184194	2	purple
Desulfobulbus	-0.246509	0.218621	2	purple
Unclassified Deltaproteobacteria	-0.255848	0.181414	2	purple
Brevundimonas	-0.264389	0.197794	2	purple
Tolumonas	-0.271369	-0.0106309	2	purple
Desulfotalea	-0.342302	0.0158596	2	purple
Limnobacter	-0.364421	0.282662	2	purple
Thauera	-0.43508	0.0567025	2	purple
unclassified derived from Deltaproteobacteria	-0.448536	0.0614095	2	purple
Methylotenera	0.373144	0.58031	3	green
Unclassified Desulfovibrionales	0.373144	0.58031	3	green
Xenorhabdus	0.373144	0.58031	3	green
Loktanella	0.312957	0.257361	3	green
Alcanivorax	0.312957	0.257361	3	green
Beijerinckia	0.311178	0.247817	3	green
Unclassified Brucellaceae	0.259271	0.056155	3	green
Afipia	0.251302	0.0207264	3	green
Zymomonas	0.23104	0.147017	3	green
Novosphingobium	0.226662	0.0861468	3	green
Parvibaculum	0.20281	0.00920656	3	green
Polynucleobacter	0.20066	0.0345561	3	green
Methylocystis	0.199928	0.021523	3	green
Nitrococcus	0.168357	0.0191472	3	green
Methylocella	0.16491	0.117862	3	green
Hyphomonas	0.147216	0.147886	3	green
Caulobacter	0.100509	0.0500551	3	green
Thiobacillus	0.0911342	-0.00397172	3	green
Rhodospirillum	0.0838452	0.00595638	3	green
Xanthomonas	0.0684129	0.0160252	3	green
Unclassified Acetobacteraceae	0.0666015	0.0813345	3	green
Methylobacterium	0.0613716	0.020638	3	green
Gluconobacter	0.0606211	0.079493	3	green
Rhodopseudomonas	0.0498353	0.00504635	3	green
Azorhizobium	0.0324992	0.0229586	3	green
Fulvimarina	-0.0329333	0.213477	3	green
Octadecabacter	0.373144	0.58031	4	orange
Roseibium	0.373144	0.58031	4	orange
Sideroxydans	0.373144	0.58031	4	orange
Sulfitobacter	0.31941	0.364274	4	orange
Halorhodospira	0.293078	0.258409	4	orange
Citreicella	0.292738	0.257044	4	orange
Paracoccus	0.282477	0.189451	4	orange
Jannaschia	0.27107	0.169926	4	orange
unclassified derived from Proteobacteria	0.259819	0.124694	4	orange
Dinoroseobacter	0.251615	0.091709	4	orange
Granulibacter	0.245593	0.15925	4	orange
Oligotropha	0.239132	0.109253	4	orange
Sorangium	0.231132	0.0441422	4	orange
Shigella	0.219631	0.00254338	4	orange
Reinekea	0.213964	-0.0596654	4	orange
Syntrophobacter	0.211013	0.0656623	4	orange
Nitrobacter	0.202151	0.00995425	4	orange
Oceanibulbus	0.201318	0.303456	4	orange
Arsenophonus	0.200852	0.127286	4	orange
Phenylobacterium	0.20034	0.00986081	4	orange
Pseudoxanthomonas	0.183873	-0.180645	4	orange
Photobacterium	0.182244	0.18645	4	orange
Plesiocystis	0.180364	0.0128067	4	orange
Unclassified Nitrosomonadaceae	0.157569	0.232966	4	orange
unclassified derived from Rhodobacterales	0.151964	0.223935	4	orange
Endoriftia	0.137051	0.113695	4	orange
Unclassified Vibrionales	0.134339	0.0365263	4	orange
Brucella	0.0729079	0.112724	4	orange
Acidiphilium	0.0687532	0.118045	4	orange
Rhizobium	0.055098	0.0439585	4	orange
Azoarcus	0.0468935	-0.010027	4	orange
Nitrosococcus	0.0452524	0.0498301	4	orange
Erwinia	0.0351287	0.0711125	4	orange
Aurantimonas	0.015169	0.15753	4	orange
Sinorhizobium	0.0114491	0.00912853	4	orange
Geobacter	0.00677379	-0.010014	4	orange
Cronobacter	-0.0148081	0.0782501	4	orange
Sphingobium	-0.0261842	0.125361	4	orange
Unclassified Sphingomonadales	-0.0284323	0.0767129	4	orange
Unclassified Sphingomonadaceae	-0.0354646	0.081753	4	orange
Unclassified Caulobacteraceae	0.373144	0.58031	5	grey
Unclassified Methylocystaceae	0.263459	0.40358	5	grey
Oceanicola	0.196018	0.180589	5	grey
Hahella	0.19375	0.121459	5	grey
Citromicrobium	0.189829	0.121116	5	grey
Xanthobacter	0.169906	0.10864	5	grey
Haliangium	0.131194	0.038424	5	grey
unclassified derived from Betaproteobacteria	0.0310817	-0.0377477	5	grey
Desulfomicrobium	-0.0266492	0.198117	5	grey
Pelobacter	-0.0324113	0.153235	5	grey
Yersinia	-0.0449732	0.13268	5	grey
Gluconacetobacter	-0.0474414	0.28083	5	grey
Salmonella	-0.0605628	0.105811	5	grey
Unclassified Rhodospirillales	-0.0727139	0.182227	5	grey
Myxococcus	-0.0914206	0.0351182	5	grey
Cellvibrio	-0.114768	0.184062	5	grey
unclassified derived from Alphaproteobacteria	-0.119111	0.114117	5	grey
Desulfuromonas	0.149705	-0.0410739	6	red
Parvularcula	0.12881	0.0508482	6	red
Kingella	0.103821	0.146364	6	red
Psychromonas	0.0927833	-0.140232	6	red
Nitratifractor	0.0819434	0.111115	6	red
Cardiobacterium	0.0741565	0.0985681	6	red
Bilophila	0.0618673	-0.126516	6	red
Pectobacterium	0.0521627	-0.12221	6	red
Wolbachia	0.0203891	-0.108114	6	red
Desulfarculus	0.0104879	-0.103721	6	red
Unclassified Rhodobacteraceae	-0.0380319	-0.0821947	6	red
Methylophaga	-0.151799	-0.0494387	6	red
Desulfatibacillum	-0.175138	-0.0413946	6	red
Laribacter	-0.196704	-0.0571683	6	red
Asaia	0.373144	0.58031	7	grey2
unclassified derived from Rhodospirillales	0.373144	0.58031	7	grey2
Neorickettsia	0.373144	0.58031	7	grey2
Orientia	0.373144	0.58031	7	grey2
Unclassified Rickettsiaceae	0.373144	0.58031	7	grey2
Pandoraea	0.373144	0.58031	7	grey2
Methylovorus	0.373144	0.58031	7	grey2
Unclassified Methylophilales	0.373144	0.58031	7	grey2
Unclassified Helicobacteraceae	0.373144	0.58031	7	grey2
Caminibacter	0.373144	0.58031	7	grey2
Unclassified Legionellaceae	0.373144	0.58031	7	grey2
Enhydrobacter	0.373144	0.58031	7	grey2
Basfia	0.239665	0.0436653	7	grey2
Unclassified Chromatiales	0.223679	-0.0920156	7	grey2
Unclassified Desulfovibrionaceae	0.183873	-0.180645	7	grey2
Sulfurospirillum	0.183873	-0.180645	7	grey2
Nautilia	0.183873	-0.180645	7	grey2
Unclassified Aeromonadaceae	0.183873	-0.180645	7	grey2
Mannheimia	0.183873	-0.180645	7	grey2
Stigmatella	0.182771	-0.235793	7	grey2
Anaplasma	0.178612	-0.0816337	7	grey2
Serratia	0.165757	-0.0718513	7	grey2
unclassified derived from Burkholderiales	0.134491	-0.104008	7	grey2
Pasteurella	0.126135	0.182318	7	grey2
Providencia	0.120193	-0.0399469	7	grey2
Thioalkalivibrio	0.100873	-0.15011	7	grey2
Psychrobacter	0.0340597	-0.0731849	7	grey2
Thiocapsa	0.0108257	0.0508277	7	grey2
Acidithiobacillus	0.00789547	-0.0531005	7	grey2
Magnetospirillum	0.0066769	0.0343307	7	grey2
Nitrosospira	0.0051303	0.0199703	7	grey2
Janthinobacterium	-0.017937	0.0447276	7	grey2
Roseomonas	-0.0204402	0.0269447	7	grey2
Unclassified Bradyrhizobiaceae	-0.0205727	0.0152443	7	grey2
Desulfovibrio	-0.0274343	0.00174197	7	grey2
Kinetoplastibacterium	-0.0380319	-0.0821947	7	grey2
Unclassified Desulfobacteraceae	-0.0380319	-0.0821947	7	grey2
Sulfuricurvum	-0.0380319	-0.0821947	7	grey2
Methylomonas	-0.0380319	-0.0821947	7	grey2
Candidatus Portiera	-0.0380319	-0.0821947	7	grey2
Histophilus	-0.0380319	-0.0821947	7	grey2
Unclassified Xanthomonadaceae	-0.0387442	-0.0213124	7	grey2
Marinobacter	-0.0409894	-0.0490558	7	grey2
Azotobacter	-0.0413772	-0.0459626	7	grey2
Unclassified Rhizobiales	-0.0435171	-0.00481567	7	grey2
Unclassified Burkholderiaceae	-0.0470094	-0.0352706	7	grey2
Vibrio	-0.0471011	0.0348586	7	grey2
Unclassified Alphaproteobacteria	-0.0485663	-0.0200423	7	grey2
Unclassified unclassified derived from Gammaproteobacteria	-0.0487114	-0.0358559	7	grey2
Pseudoalteromonas	-0.0505302	-0.00105349	7	grey2
Rhodobacter	-0.050646	0.0391556	7	grey2
Labrenzia	-0.0509834	-0.00298226	7	grey2
Starkeya	-0.0551755	0.00859847	7	grey2
Unclassified Proteobacteria	-0.0556219	-0.0381345	7	grey2
Unclassified Gammaproteobacteria	-0.0582266	-0.0457581	7	grey2
Unclassified Rhizobiaceae	-0.0596213	-0.00362677	7	grey2
Unclassified Betaproteobacteria	-0.0597163	-0.0472844	7	grey2
Acetobacter	-0.0614557	0.0401497	7	grey2
Unclassified Enterobacteriaceae	-0.063869	-0.034925	7	grey2
Unclassified Burkholderiales	-0.065715	-0.0430142	7	grey2
unclassified derived from Gammaproteobacteria	-0.0672509	-0.0336635	7	grey2
Rickettsia	-0.0703404	-0.0631788	7	grey2
Pantoea	-0.0709833	-0.0104707	7	grey2
Unclassified Rhodocyclaceae	-0.0718936	-0.0318068	7	grey2
Unclassified Comamonadaceae	-0.0720826	-0.0594478	7	grey2
Hyphomicrobium	-0.0722072	-0.0121069	7	grey2
Variovorax	-0.0770908	-0.0456279	7	grey2
Aeromonas	-0.0772831	-0.000828702	7	grey2
Unclassified Neisseriaceae	-0.0785438	-0.0282359	7	grey2
Enterobacter	-0.0817073	-0.0343466	7	grey2
Curvibacter	-0.08271	-0.0512132	7	grey2
Comamonas	-0.0830477	-0.0487884	7	grey2
Pseudovibrio	-0.084571	-0.0110817	7	grey2
unclassified derived from Rhodobacteraceae	-0.0847793	-0.00931242	7	grey2
Unclassified Alcaligenaceae	-0.0893026	-0.0289465	7	grey2
Ruegeria	-0.0925538	-0.056826	7	grey2
Dickeya	-0.0935596	-0.0872153	7	grey2
Azospirillum	-0.0960261	0.0425618	7	grey2
Herbaspirillum	-0.0970663	0.00738995	7	grey2
Rubrivivax	-0.103344	-0.0403454	7	grey2
Unclassified Vibrionaceae	-0.10514	-0.0282374	7	grey2
Helicobacter	-0.107918	0.0134298	7	grey2
unclassified derived from Enterobacteriaceae	-0.109051	-0.00431669	7	grey2
Lautropia	-0.11016	0.0260371	7	grey2
Unclassified Rhodospirillaceae	-0.110169	0.0514642	7	grey2
Unclassified Oxalobacteraceae	-0.111258	0.0178232	7	grey2
Unclassified Myxococcales	-0.111439	-0.0483617	7	grey2
unclassified derived from Alteromonadales	-0.126302	-0.0611429	7	grey2
Haemophilus	-0.136473	-0.102133	7	grey2
Lutiella	-0.147358	0.0176495	7	grey2
Alteromonas	-0.150241	0.0767972	7	grey2
Oxalobacter	-0.1541	0.00486524	7	grey2
Beggiatoa	-0.154812	-0.0134342	7	grey2
Moraxella	-0.159551	-0.0996971	7	grey2
Chelativorans	-0.166136	0.112222	7	grey2
Candidatus Regiella	-0.168901	0.0215194	7	grey2
Phaeobacter	-0.171257	0.161889	7	grey2
Eikenella	-0.206476	-0.0817005	7	grey2
unclassified derived from Vibrionaceae	-0.206581	0.346359	7	grey2
Unclassified unclassified derived from Burkholderiales	-0.226833	-0.0865242	7	grey2
Mariprofundus	-0.261877	0.128504	7	grey2
Succinatimonas	-0.262434	-0.0686564	7	grey2
Colwellia	-0.283635	0.00372334	7	grey2
Aggregatibacter	-0.285184	-0.0371678	7	grey2
Buchnera	-0.290894	0.00626272	7	grey2
Proteus	-0.290894	0.00626272	7	grey2
Unclassified Alteromonadaceae	-0.303987	0.00155075	7	grey2
Ferrimonas	-0.303987	0.00155075	7	grey2
Desulfurivibrio	-0.307198	-0.049255	7	grey2
Halothiobacillus	-0.326243	0.163672	7	grey2
Citrobacter	-0.346993	-0.0362255	7	grey2
Candidatus Hamiltonella	-0.353778	0.0201455	7	grey2
Collimonas	-0.356306	0.107016	7	grey2
Sulfurimonas	-0.365355	0.0323107	7	grey2
Unclassified Chromatiaceae	-0.400183	0.0374756	7	grey2
Bermanella	-0.47164	0.239393	7	grey2
Edwardsiella	-0.475453	0.070826	7	grey2
Methyloversatilis	-0.47964	0.0722905	7	grey2
Aliivibrio	-0.526132	0.217402	7	grey2
Azohydromonas	-0.697158	0.148384	7	grey2
unclassified derived from Nitrosomonadaceae	-0.697158	0.148384	7	grey2
Sterolibacterium	-0.697158	0.148384	7	grey2
Unclassified Desulfuromonadales	-0.697158	0.148384	7	grey2
Sulfurovum	-0.697158	0.148384	7	grey2
Rahnella	-0.697158	0.148384	7	grey2
Sphingopyxis	0.280133	0.386498	8	cyan
Sphingomonas	0.102057	0.248126	8	cyan
Erythrobacter	0.101842	0.265665	8	cyan

## Sheet: NMDS_Actinobacteria_Genus_Coord
Genus	NMDS1	NMDS2	clusters	colors
Acidimicrobium	-0.517244	-0.273953	1	blue
Unclassified Actinomycetaceae	-0.481391	-0.504537	1	blue
Actinosynnema	-0.370314	-0.0992818	1	blue
Brevibacterium	-0.0283004	-0.0539791	1	blue
Dermacoccus	0.399829	0.0729421	1	blue
Kytococcus	-0.358654	-0.00614479	1	blue
Unclassified Dermacoccaceae	0.693174	-0.262262	1	blue
Dietzia	-0.391505	0.00199527	1	blue
Stackebrandtia	-0.363624	0.0649897	1	blue
Intrasporangium	-0.376969	0.0792116	1	blue
Unclassified Intrasporangiaceae	-0.388216	0.0235542	1	blue
Clavibacter	-0.300961	0.166382	1	blue
Unclassified Microbacteriaceae	-0.517244	-0.273953	1	blue
Renibacterium	-0.334866	0.115161	1	blue
Actinoplanes	-0.517244	-0.273953	1	blue
Unclassified Nocardiaceae	0.31021	-0.143978	1	blue
Kribbella	-0.369943	-0.0761862	1	blue
Nocardiopsis	-0.376602	-0.0501419	1	blue
Thermobifida	-0.354573	0.00496917	1	blue
Amycolatopsis	-0.359844	0.0995954	1	blue
Unclassified Pseudonocardiaceae	-0.483879	-0.488535	1	blue
Unclassified Bifidobacteriaceae	-0.364781	0.322746	1	blue
Collinsella	-0.333195	0.111823	1	blue
Acidithiomicrobium	-0.192479	0.997086	2	purple
Mobiluncus	-0.169924	0.145168	2	purple
Lechevalieria	-0.169924	0.145168	2	purple
Catenulispora	0.155942	-0.0835218	2	purple
Microbacterium	0.424575	-0.165433	2	purple
Micrococcus	-0.272117	0.685403	2	purple
Nesterenkonia	-0.169924	0.145168	2	purple
Nakamurella	0.0804317	0.0427348	2	purple
Pimelobacter	-0.334145	0.0780068	2	purple
Sanguibacter	0.0709543	0.0666684	2	purple
Unclassified Streptosporangiaceae	-0.45254	-0.690092	2	purple
Tropheryma	0.006752	0.125827	2	purple
Gardnerella	0.488458	-0.115302	2	purple
Atopobium	1.33219	-0.17821	2	purple
Eggerthella	0.678083	0.201114	2	purple
Gordonibacter	0.924374	-0.295176	2	purple
Olsenella	-0.169924	0.145168	2	purple
unclassified derived from Actinobacteria class	0.385086	0.0699287	2	purple
Actinomyces	0.290441	-0.0189477	3	orange
Beutenbergia	-0.098725	-0.0318064	3	orange
Cellulomonas	0.033861	0.00520191	3	orange
Corynebacterium	0.079329	0.0179321	3	orange
Brachybacterium	-0.356572	-0.122082	3	orange
Frankia	0.023007	0.0424342	3	orange
Geodermatophilus	-0.102372	-0.0110541	3	orange
Gordonia	0.0800366	0.0516783	3	orange
Janibacter	-0.336364	-0.0275692	3	orange
Jonesia	-0.337202	0.01722	3	orange
Kineococcus	0.0409253	0.0379771	3	orange
Leifsonia	-0.114965	0.18076	3	orange
Arthrobacter	0.229465	0.0389946	3	orange
Kocuria	-0.119819	0.0615915	3	orange
Rothia	0.334946	-0.0464096	3	orange
Unclassified Micrococcaceae	-0.314834	0.113001	3	orange
Micromonospora	0.379364	-0.143224	3	orange
Salinispora	-0.324597	0.0163718	3	orange
Unclassified Micromonosporaceae	-0.375164	-0.254381	3	orange
Mycobacterium	0.0417145	0.0442259	3	orange
Nocardia	-0.0438879	-0.0276203	3	orange
Rhodococcus	-0.00964815	0.00476711	3	orange
Aeromicrobium	0.424597	-0.217691	3	orange
Nocardioides	0.0448617	0.0276851	3	orange
Unclassified Nocardioidaceae	0.287766	-0.0404324	3	orange
Xylanimonas	-0.0408948	-0.0776958	3	orange
Propionibacterium	0.0856592	0.0264178	3	orange
Saccharomonospora	0.0440345	0.0422058	3	orange
Saccharopolyspora	-0.239379	-0.0722682	3	orange
Thermobispora	-0.342279	-0.0199479	3	orange
Segniliparus	0.43205	-0.220988	3	orange
Kitasatospora	0.425176	-0.221814	3	orange
Streptomyces	0.0812157	0.0353548	3	orange
Unclassified Streptomycetaceae	0.332066	-0.0411721	3	orange
Streptosporangium	-0.0575602	0.0438184	3	orange
Thermomonospora	-0.331891	-0.0344395	3	orange
Tsukamurella	0.0680378	-0.018545	3	orange
Unclassified Actinomycetales	0.323413	0.00376209	3	orange
Bifidobacterium	-0.0564323	0.116048	3	orange
Rubrobacter	-0.351947	-0.0331595	3	orange
Conexibacter	-0.381639	-0.175187	3	orange
Unclassified Actinobacteria class	0.321916	0.0246562	3	orange
Arcanobacterium	-0.45254	-0.690092	4	red
Dactylosporangium	0.657992	-0.187984	4	red
Unclassified Coriobacteriaceae	0.602579	-0.387471	4	red

## Sheet: NMDS_Cyanobacteria_Genus_Coord.
Genus	NMDS1	NMDS2	cluster	colors
Gloeobacter	0.145552	-0.359288	1	blue
Unclassified Cyanobacteria	0.0541457	-0.0842344	1	blue
Cyanobium	0.670015	0.347155	1	blue
Synechococcus	0.366478	0.19509	1	blue
Thermosynechococcus	-0.147795	0.173396	1	blue
Unclassified unclassified derived from Chroococcales	0.297765	0.366542	1	blue
unclassified derived from Chroococcales	0.968378	-0.0267495	1	blue
Nostoc	0.126406	-0.159441	1	blue
Raphidiopsis	-0.0775566	-0.418173	1	blue
Lyngbya	-0.395694	0.486643	1	blue
Unclassified unclassified derived from Oscillatoriales	-0.389142	0.495432	1	blue
Prochlorococcus	0.357417	-0.0802227	1	blue
Unclassified unclassified derived from Cyanobacteria	-0.207161	0.54513	1	blue
Acaryochloris	0.0786886	-0.17213	1	blue
Crocosphaera	-0.516199	0.307756	2	purple
Aphanizomenon	-0.807716	0.303841	2	purple
Dolichospermum	-0.616699	-0.0511864	2	purple
Nodularia	-0.67707	0.376772	2	purple
Unclassified Nostocales	-0.81864	0.329431	2	purple
Cyanothece	-0.0366061	-0.300053	3	orange
Microcystis	0.0170226	-0.0519017	3	orange
Synechocystis	0.328576	-0.440236	3	orange
Anabaena	-0.130932	-0.319108	3	orange
Arthrospira	0.110515	-0.625667	3	orange
Trichodesmium	-0.331798	-0.225678	3	orange
Cylindrospermopsis	-0.824748	0.34374	4	red
Unclassified Nostocaceae	-0.184946	0.378528	4	red
Microcoleus	-0.502997	-0.291791	4	red
Oscillatoria	-0.544939	-0.208533	4	red

## Sheet: NMDS_Subsystems_Level1_Coord.
Subsystems Level 1	NMDS1	NMDS2	clusters	colors
Amino_Acids_and_Derivatives	0.222502	-0.0238564	1	blue
Cell Wall_and_Capsule	-0.110612	0.247839	1	blue
Cofactors_Vitamins_Prosthetic_Pigments	0.283005	-0.0399133	1	blue
Iron_acquisition_and_metabolism	0.111102	0.595225	1	blue
Metabolism_of_Aromatic Compounds	0.0553275	0.580639	1	blue
Nucleosides_and_Nucleotides	-0.0511926	0.365035	1	blue
Photosynthesis	0.285945	0.0287966	1	blue
Protein_Metabolism	0.237664	-0.0277441	1	blue
Regulation_and_Cell_signaling	0.0847179	0.183882	1	blue
Respiration	0.291556	-0.0106756	1	blue
Virulence_Disease_and_Defense	-0.25237	0.3964	1	blue
Carbohydrates	-0.0542588	0.00797156	2	red
Clustering_based	0.0891302	-0.121159	2	red
DNA_Metabolism	-0.428742	0.235107	2	red
Miscellaneous	-0.341727	-0.0286017	2	red
RNA_Metabolism	0.0766476	-0.0872448	2	red
Stress_Response	0.205916	-0.126739	2	red
Cell_Division_and_Cell_Cycle	-0.55805	-0.194914	3	purple
Fatty_Acids_Lipids_and_Isoprenoids	-0.596693	-0.0423585	3	purple
Motility_and_Chemotaxis	-0.702791	-0.045335	3	purple
Nitrogen_Metabolism	-0.562633	-0.135806	3	purple
Phages_Prophages_Transposable_elements_Plasmids	-0.433085	-0.0708954	3	purple
Secondary_Metabolism	-0.12949	-0.27955	3	purple
Sulfur_Metabolism	-0.609102	-0.228861	3	purple
Membrane_Transport	-0.706285	0.178781	4	orange
Phosphorus_Metabolism	-0.725792	0.194584	4	orange
Potassium_metabolism	-0.734134	0.201342	4	orange
