# Supplementary material for: Taxon-Function Decoupling as an Adaptive Signature of Lake Microbial Metacommunities Under a Chronic Polymetallic Pollution Gradient
Source: Front Microbiol. 2018 May 3;9:869. doi: 10.3389/fmicb.2018.00869 (PMC5943556; doi:10.3389/fmicb.2018.00869)
Supplement: Supplementary File S5 — This file reported subsystems annotations and data analysis; All subsystems data (dataset output of STAMP software) in Table 1, subsystems level 1 relative abundance (RA) in Table 2, list of all annotated subsystems in Table 3, function profiles classification of RA proportions in Table 4, different function profiles (FP) (Tables 5, 6, 7, 8), resume of FP occurrence in subsystems level 1 (Table 9), summary of most abundant functions (Table 10) and summary of the subsystem “virulence, disease, and defense” (Table 11). [file Data_Sheet_5.xlsx]

## Sheet: All_Func_ORF_Rel_freq_per_Subsy
ORFs annotation parameters : 1e-12 ; 85 % identity as threshold, 50 % alignment length, SEED darabase
STAMP software analysis : Function abundance normalisation using SUM function by subsystem (subsystem level 1 as parent )
level 1	level 2	level 3	function	OPA: rel. freq. (%)	DAS: rel. freq. (%)	BAR: rel. freq. (%)	LAR: rel. freq. (%)	TUR: rel. freq. (%)	Ratio (OPA/DAS)	Ratio (OPA/BAR)	Ratio (OPA/LAR)	Ratio (OPA/TUR)
Amino Acids and Derivatives	Alanine, serine, and glycine	Alanine biosynthesis	Alanine racemase (EC 5.1.1.1)	0	0.21239	0.149231	0	0	0.824817	0.870147	1	1
Amino Acids and Derivatives	Aromatic amino acids and derivatives	Chorismate: Intermediate for synthesis of Tryptophan, PAPA antibiotics, PABA, 3-hydroxyanthranilate and more.	Anthranilate synthase, aminase component (EC 4.1.3.27)	0.476883	0.741747	0.498081	0.471018	0.516398	0.847932	0.98585	1.00399	0.973942
Amino Acids and Derivatives	Aromatic amino acids and derivatives	Tryptophan synthesis	Anthranilate synthase, aminase component (EC 4.1.3.27) - #1	0.476883	0.741747	0.498081	0.471018	0.516398	0.847932	0.98585	1.00399	0.973942
Amino Acids and Derivatives	Branched-chain amino acids	Valine degradation	Dihydrolipoamide dehydrogenase of branched-chain alpha-keto acid dehydrogenase (EC 1.8.1.4) - #2	0.152197	0.354702	0.203496	0.403408	0.150994	0.850517	0.957375	0.820999	1.00105
Amino Acids and Derivatives	Branched-chain amino acids	Leucine Degradation and HMG-CoA Metabolism	Dihydrolipoamide dehydrogenase of branched-chain alpha-keto acid dehydrogenase (EC 1.8.1.4) - #1	0.152197	0.354702	0.203496	0.403408	0.150994	0.850517	0.957375	0.820999	1.00105
Amino Acids and Derivatives	Branched-chain amino acids	Isoleucine degradation	Dihydrolipoamide dehydrogenase of branched-chain alpha-keto acid dehydrogenase (EC 1.8.1.4)	0.152197	0.354702	0.203496	0.403408	0.150994	0.850517	0.957375	0.820999	1.00105
Amino Acids and Derivatives	Aromatic amino acids and derivatives	Chorismate: Intermediate for synthesis of Tryptophan, PAPA antibiotics, PABA, 3-hydroxyanthranilate and more.	Para-aminobenzoate synthase, aminase component (EC 2.6.1.85)	0	0.166031	0.205434	0.0878933	0	0.85761	0.829577	0.919208	1
Amino Acids and Derivatives	Proline and 4-hydroxyproline	Proline Synthesis	Pyrroline-5-carboxylate reductase (EC 1.5.1.2) - #1	0	0.140156	0	0	0	0.877073	1	1	1
Amino Acids and Derivatives	Proline and 4-hydroxyproline	A Hypothetical Protein Related to Proline Metabolism	Pyrroline-5-carboxylate reductase (EC 1.5.1.2)	0	0.140156	0	0	0	0.877073	1	1	1
Amino Acids and Derivatives	Proline and 4-hydroxyproline	Proline Synthesis	Gamma-glutamyl phosphate reductase (EC 1.2.1.41)	0.304393	0.474373	0.666693	0.37749	0.311047	0.884711	0.782624	0.946935	0.994925
Amino Acids and Derivatives	Lysine, threonine, methionine, and cysteine	Methionine Biosynthesis	Cystathionine gamma-synthase (EC 2.5.1.48)	0.106538	0.250124	0.0910888	0.0732444	0	0.885142	1.01416	1.03102	1.10654
Amino Acids and Derivatives	Aromatic amino acids and derivatives	Chorismate Synthesis	Shikimate kinase I (EC 2.7.1.71)	0	0.128296	0.0523276	0.0721176	0.169113	0.886292	0.950274	0.932734	0.855349
Amino Acids and Derivatives	Aromatic amino acids and derivatives	Common Pathway For Synthesis of Aromatic Compounds (DAHP synthase to chorismate)	Shikimate kinase I (EC 2.7.1.71) - #1	0	0.128296	0.0523276	0.0721176	0.169113	0.886292	0.950274	0.932734	0.855349
Amino Acids and Derivatives	Aromatic amino acids and derivatives	Chorismate: Intermediate for synthesis of Tryptophan, PAPA antibiotics, PABA, 3-hydroxyanthranilate and more.	Anthranilate phosphoribosyltransferase (EC 2.4.2.18)	0.143741	0.288936	0.228691	0.322275	0.250649	0.887353	0.930862	0.86498	0.914518
Amino Acids and Derivatives	Aromatic amino acids and derivatives	Tryptophan synthesis	Anthranilate phosphoribosyltransferase (EC 2.4.2.18) - #1	0.143741	0.288936	0.228691	0.322275	0.250649	0.887353	0.930862	0.86498	0.914518
Amino Acids and Derivatives	Lysine, threonine, methionine, and cysteine	Lysine Biosynthesis DAP Pathway	Diaminopimelate decarboxylase (EC 4.1.1.20)	0.336524	0.505639	0.430249	0.501442	0.528477	0.887679	0.934469	0.89016	0.874415
Amino Acids and Derivatives	Alanine, serine, and glycine	Glycine and Serine Utilization	Glycine dehydrogenase [decarboxylating] (glycine cleavage system P protein) (EC 1.4.4.2)	1.05692	1.31315	0.897322	1.01753	0.69759	0.889229	1.08412	1.01952	1.21167
Amino Acids and Derivatives	Alanine, serine, and glycine	Glycine cleavage system	Glycine dehydrogenase [decarboxylating] (glycine cleavage system P protein) (EC 1.4.4.2) - #1	1.05692	1.31315	0.897322	1.01753	0.69759	0.889229	1.08412	1.01952	1.21167
Amino Acids and Derivatives	Aromatic amino acids and derivatives	Tryptophan synthesis	Acting phosphoribosylanthranilate isomerase (EC 5.3.1.24)	0.0490412	0.178968	0.151169	0.0507077	0.0150994	0.889796	0.911284	0.998414	1.03344
Amino Acids and Derivatives	Branched-chain amino acids	Isoleucine degradation	Butyryl-CoA dehydrogenase (EC 1.3.99.2)	0.483647	0.632857	0.544595	0.471018	0.546597	0.908621	0.960541	1.00859	0.959298
Amino Acids and Derivatives	Lysine, threonine, methionine, and cysteine	Lysine fermentation	Butyryl-CoA dehydrogenase (EC 1.3.99.2) - #2	0.483647	0.632857	0.544595	0.471018	0.546597	0.908621	0.960541	1.00859	0.959298
Amino Acids and Derivatives	Branched-chain amino acids	Valine degradation	Butyryl-CoA dehydrogenase (EC 1.3.99.2) - #1	0.483647	0.632857	0.544595	0.471018	0.546597	0.908621	0.960541	1.00859	0.959298
Amino Acids and Derivatives	Arginine; urea cycle, polyamines	Cyanophycin Metabolism	Cyanophycin synthase (EC 6.3.2.29)(EC 6.3.2.30)	0.0744073	0.181124	0.205434	0.323402	0.338226	0.909648	0.891303	0.811852	0.80286
Amino Acids and Derivatives	Branched-chain amino acids	Leucine Degradation and HMG-CoA Metabolism	Methylcrotonyl-CoA carboxylase biotin-containing subunit (EC 6.4.1.4) - #2	0.0439679	0.146624	0.0755843	0.193816	0.202331	0.910471	0.970605	0.87448	0.868286
Amino Acids and Derivatives	Branched-chain amino acids	HMG CoA Synthesis	Methylcrotonyl-CoA carboxylase biotin-containing subunit (EC 6.4.1.4) - #1	0.0439679	0.146624	0.0755843	0.193816	0.202331	0.910471	0.970605	0.87448	0.868286
Amino Acids and Derivatives	Branched-chain amino acids	Branched chain amino acid degradation regulons	Methylcrotonyl-CoA carboxylase biotin-containing subunit (EC 6.4.1.4)	0.0439679	0.146624	0.0755843	0.193816	0.202331	0.910471	0.970605	0.87448	0.868286
Amino Acids and Derivatives	Histidine Metabolism	Histidine Biosynthesis	Histidinol dehydrogenase (EC 1.1.1.23)	0.289174	0.40753	0.445754	0.39552	0.45902	0.915912	0.891697	0.923795	0.883589
Amino Acids and Derivatives	Aromatic amino acids and derivatives	Chorismate: Intermediate for synthesis of Tryptophan, PAPA antibiotics, PABA, 3-hydroxyanthranilate and more.	Phosphoribosylformimino-5-aminoimidazole carboxamide ribotide isomerase (EC 5.3.1.16)	0.160652	0.265218	0.244196	0.187055	0.268768	0.917354	0.932853	0.977758	0.914786
Amino Acids and Derivatives	Histidine Metabolism	Histidine Biosynthesis	Phosphoribosylformimino-5-aminoimidazole carboxamide ribotide isomerase (EC 5.3.1.16) - #1	0.160652	0.265218	0.244196	0.187055	0.268768	0.917354	0.932853	0.977758	0.914786
Amino Acids and Derivatives	Arginine; urea cycle, polyamines	Arginine Biosynthesis extended	Argininosuccinate lyase (EC 4.3.2.1)	0.444753	0.572482	0.484515	0.437213	0.452981	0.918772	0.973215	1.00525	0.994337
Amino Acids and Derivatives	Lysine, threonine, methionine, and cysteine	Methionine Biosynthesis	5,10-methylenetetrahydrofolate reductase (EC 1.5.1.20)	0.131904	0.226405	0.346913	0.244524	0.259709	0.922944	0.840369	0.909508	0.898544
Amino Acids and Derivatives	Lysine, threonine, methionine, and cysteine	Threonine degradation	Threonine dehydratase (EC 4.3.1.19) - #1	0	0.080859	0.0484515	0.0811322	0	0.92519	0.953788	0.924956	1
Amino Acids and Derivatives	Branched-chain amino acids	Branched-Chain Amino Acid Biosynthesis	Threonine dehydratase (EC 4.3.1.19)	0	0.080859	0.0484515	0.0811322	0	0.92519	0.953788	0.924956	1
Amino Acids and Derivatives	Lysine, threonine, methionine, and cysteine	Methionine Biosynthesis	Cysteine synthase (EC 2.5.1.47) - #1	0.277336	0.37842	0.348851	0.301992	0.452981	0.926667	0.946981	0.981063	0.879114
Amino Acids and Derivatives	Lysine, threonine, methionine, and cysteine	Cysteine Biosynthesis	Cysteine synthase (EC 2.5.1.47)	0.277336	0.37842	0.348851	0.301992	0.452981	0.926667	0.946981	0.981063	0.879114
Amino Acids and Derivatives	Lysine, threonine, methionine, and cysteine	Cysteine Biosynthesis	Sulfate permease	0	0.0754684	0.220939	0.166772	0	0.929827	0.819042	0.857066	1
Amino Acids and Derivatives	Lysine, threonine, methionine, and cysteine	Lysine Biosynthesis DAP Pathway	N-succinyl-L,L-diaminopimelate aminotransferase alternative (EC 2.6.1.17)	0.182636	0.270608	0.172487	0.150996	0.0634173	0.930764	1.00866	1.02749	1.11211
Amino Acids and Derivatives	Alanine, serine, and glycine	Serine Biosynthesis	Phosphoserine phosphatase (EC 3.1.3.3) - #1	0.275645	0.368717	0.238381	0.197196	0.268768	0.932	1.03009	1.06553	1.00542
Amino Acids and Derivatives	Alanine, serine, and glycine	Glycine and Serine Utilization	Phosphoserine phosphatase (EC 3.1.3.3)	0.275645	0.368717	0.238381	0.197196	0.268768	0.932	1.03009	1.06553	1.00542
Amino Acids and Derivatives	Glutamine, glutamate, aspartate, asparagine; ammonia assimilation	Glutamine synthetases	Glutamine synthetase type III, GlnN (EC 6.3.1.2) - #1	0.103156	0.181124	0.0736463	0.218606	0.163073	0.933988	1.02749	0.90526	0.948483
Amino Acids and Derivatives	Glutamine, glutamate, aspartate, asparagine; ammonia assimilation	Glutamine, Glutamate, Aspartate and Asparagine Biosynthesis	Glutamine synthetase type III, GlnN (EC 6.3.1.2)	0.103156	0.181124	0.0736463	0.218606	0.163073	0.933988	1.02749	0.90526	0.948483
Amino Acids and Derivatives	Aromatic amino acids and derivatives	Tryptophan synthesis	Anthranilate synthase, amidotransferase component (EC 4.1.3.27) - #1	0.241824	0.328827	0.312028	0.202831	0.286888	0.934526	0.946492	1.03242	0.964982
Amino Acids and Derivatives	Aromatic amino acids and derivatives	Chorismate: Intermediate for synthesis of Tryptophan, PAPA antibiotics, PABA, 3-hydroxyanthranilate and more.	Anthranilate synthase, amidotransferase component (EC 4.1.3.27)	0.241824	0.328827	0.312028	0.202831	0.286888	0.934526	0.946492	1.03242	0.964982
Amino Acids and Derivatives	Arginine; urea cycle, polyamines	Polyamine Metabolism	Putrescine transport system permease protein PotH (TC 3.A.1.11.2)	0.121757	0.198374	0.125974	0.100288	0.0392583	0.936066	0.996255	1.01951	1.07938
Amino Acids and Derivatives	Proline and 4-hydroxyproline	Proline, 4-hydroxyproline uptake and utilization	D-amino-acid oxidase (EC 1.4.3.3)	0.00845537	0.0765466	0	0.00676102	0.0483179	0.93675	1.00846	1.00168	0.961975
Amino Acids and Derivatives	Aromatic amino acids and derivatives	Chorismate: Intermediate for synthesis of Tryptophan, PAPA antibiotics, PABA, 3-hydroxyanthranilate and more.	Isochorismate synthase (EC 5.4.4.2)	0.0659519	0.133687	0.149231	0.0597223	0	0.940252	0.927535	1.00588	1.06595
Amino Acids and Derivatives	Histidine Metabolism	Histidine Biosynthesis	ATP phosphoribosyltransferase (EC 2.4.2.17)	0.147123	0.219937	0.170549	0.161138	0.169113	0.940314	0.979987	0.987931	0.981191
Amino Acids and Derivatives	Proline and 4-hydroxyproline	Proline, 4-hydroxyproline uptake and utilization	Delta-1-pyrroline-5-carboxylate dehydrogenase (EC 1.5.1.12) - #1	0.182636	0.256593	0.375984	0.264807	0.335206	0.941145	0.859484	0.935033	0.885733
Amino Acids and Derivatives	Arginine; urea cycle, polyamines	Arginine and Ornithine Degradation	Delta-1-pyrroline-5-carboxylate dehydrogenase (EC 1.5.1.12)	0.182636	0.256593	0.375984	0.264807	0.335206	0.941145	0.859484	0.935033	0.885733
Amino Acids and Derivatives	Alanine, serine, and glycine	Alanine biosynthesis	Branched-chain amino acid aminotransferase (EC 2.6.1.42)	0.448135	0.537982	0.412807	0.410169	0.492239	0.941581	1.02501	1.02692	0.970444
Amino Acids and Derivatives	Branched-chain amino acids	Isoleucine degradation	Branched-chain amino acid aminotransferase (EC 2.6.1.42) - #3	0.448135	0.537982	0.412807	0.410169	0.492239	0.941581	1.02501	1.02692	0.970444
Amino Acids and Derivatives	Branched-chain amino acids	Branched chain amino acid degradation regulons	Branched-chain amino acid aminotransferase (EC 2.6.1.42) - #2	0.448135	0.537982	0.412807	0.410169	0.492239	0.941581	1.02501	1.02692	0.970444
Amino Acids and Derivatives	Branched-chain amino acids	Leucine Degradation and HMG-CoA Metabolism	Branched-chain amino acid aminotransferase (EC 2.6.1.42) - #5	0.448135	0.537982	0.412807	0.410169	0.492239	0.941581	1.02501	1.02692	0.970444
Amino Acids and Derivatives	Branched-chain amino acids	Leucine Biosynthesis	Branched-chain amino acid aminotransferase (EC 2.6.1.42) - #4	0.448135	0.537982	0.412807	0.410169	0.492239	0.941581	1.02501	1.02692	0.970444
Amino Acids and Derivatives	Branched-chain amino acids	Branched-Chain Amino Acid Biosynthesis	Branched-chain amino acid aminotransferase (EC 2.6.1.42) - #1	0.448135	0.537982	0.412807	0.410169	0.492239	0.941581	1.02501	1.02692	0.970444
Amino Acids and Derivatives	Branched-chain amino acids	Valine degradation	Branched-chain amino acid aminotransferase (EC 2.6.1.42) - #6	0.448135	0.537982	0.412807	0.410169	0.492239	0.941581	1.02501	1.02692	0.970444
Amino Acids and Derivatives	Histidine Metabolism	Histidine Biosynthesis	Histidinol-phosphate aminotransferase (EC 2.6.1.9)	0.111611	0.178968	0.149231	0.203957	0.323126	0.942868	0.967265	0.923298	0.84014
Amino Acids and Derivatives	Lysine, threonine, methionine, and cysteine	Methionine Biosynthesis	Methionine ABC transporter ATP-binding protein	0.0270572	0.0840934	0.110469	0.108176	0.265749	0.947388	0.924886	0.926799	0.811423
Amino Acids and Derivatives	Lysine, threonine, methionine, and cysteine	Methionine Degradation	Methionine ABC transporter ATP-binding protein - #1	0.0270572	0.0840934	0.110469	0.108176	0.265749	0.947388	0.924886	0.926799	0.811423
Amino Acids and Derivatives	Lysine, threonine, methionine, and cysteine	Cysteine Biosynthesis	Sulfate adenylyltransferase subunit 2 (EC 2.7.7.4)	0.201238	0.265218	0.147293	0.166772	0.256689	0.949432	1.04702	1.02954	0.955875
Amino Acids and Derivatives	Arginine; urea cycle, polyamines	Arginine Biosynthesis extended	N-acetylglutamate synthase (EC 2.3.1.1)	0.437988	0.514264	0.573666	0.388759	0.452981	0.949629	0.913783	1.03545	0.989682
Amino Acids and Derivatives	Aromatic amino acids and derivatives	Phenylalanine and Tyrosine Branches from Chorismate	Prephenate dehydratase (EC 4.2.1.51) - #1	0.140359	0.199452	0.149231	0.120572	0.138914	0.950733	0.992281	1.01766	1.00127
Amino Acids and Derivatives	Aromatic amino acids and derivatives	Chorismate Synthesis	Prephenate dehydratase (EC 4.2.1.51)	0.140359	0.199452	0.149231	0.120572	0.138914	0.950733	0.992281	1.01766	1.00127
Amino Acids and Derivatives	Glutamine, glutamate, aspartate, asparagine; ammonia assimilation	Glutamine, Glutamate, Aspartate and Asparagine Biosynthesis	NAD-specific glutamate dehydrogenase (EC 1.4.1.2) - #1	0.169107	0.228562	0.102717	0.237763	0.208371	0.951607	1.06021	0.944533	0.967507
Amino Acids and Derivatives	Glutamine, glutamate, aspartate, asparagine; ammonia assimilation	Glutamate dehydrogenases	NAD-specific glutamate dehydrogenase (EC 1.4.1.2)	0.169107	0.228562	0.102717	0.237763	0.208371	0.951607	1.06021	0.944533	0.967507
Amino Acids and Derivatives	Lysine, threonine, methionine, and cysteine	Methionine Degradation	Methionine gamma-lyase (EC 4.4.1.11)	0	0.0485154	0.0213187	0.0383124	0	0.953729	0.979126	0.963101	1
Amino Acids and Derivatives	Alanine, serine, and glycine	Glycine and Serine Utilization	Glycine cleavage system H protein	0.158961	0.214546	0.158921	0.148742	0.163073	0.954234	1.00003	1.0089	0.996465
Amino Acids and Derivatives	Alanine, serine, and glycine	Glycine cleavage system	Glycine cleavage system H protein - #1	0.158961	0.214546	0.158921	0.148742	0.163073	0.954234	1.00003	1.0089	0.996465
Amino Acids and Derivatives	Aromatic amino acids and derivatives	Phenylalanine and Tyrosine Branches from Chorismate	Biosynthetic Aromatic amino acid aminotransferase beta (EC 2.6.1.57)	0.0862448	0.137999	0.228691	0.121698	0.271788	0.954521	0.884067	0.968393	0.854108
Amino Acids and Derivatives	Histidine Metabolism	Histidine Biosynthesis	Imidazole glycerol phosphate synthase amidotransferase subunit (EC 2.4.2.-)	0.0997734	0.150937	0.178301	0.123952	0.147974	0.955546	0.933355	0.978488	0.958013
Amino Acids and Derivatives	Aromatic amino acids and derivatives	Chorismate Synthesis	Cyclohexadienyl dehydrogenase (EC 1.3.1.12)(EC 1.3.1.43)	0	0.0463592	0.0600798	0.0890201	0.211391	0.955695	0.943325	0.918257	0.825497
Amino Acids and Derivatives	Aromatic amino acids and derivatives	Phenylalanine and Tyrosine Branches from Chorismate	Cyclohexadienyl dehydrogenase (EC 1.3.1.12)(EC 1.3.1.43) - #1	0	0.0463592	0.0600798	0.0890201	0.211391	0.955695	0.943325	0.918257	0.825497
Amino Acids and Derivatives	Alanine, serine, and glycine	Glycine and Serine Utilization	Cystathionine beta-synthase (EC 4.2.1.22)	0.0101464	0.0560623	0.065894	0.157757	0.0543577	0.956522	0.947699	0.872503	0.958068
Amino Acids and Derivatives	Lysine, threonine, methionine, and cysteine	Methionine Biosynthesis	Cystathionine beta-synthase (EC 4.2.1.22) - #2	0.0101464	0.0560623	0.065894	0.157757	0.0543577	0.956522	0.947699	0.872503	0.958068
Amino Acids and Derivatives	Lysine, threonine, methionine, and cysteine	Methionine Degradation	Cystathionine beta-synthase (EC 4.2.1.22) - #3	0.0101464	0.0560623	0.065894	0.157757	0.0543577	0.956522	0.947699	0.872503	0.958068
Amino Acids and Derivatives	Lysine, threonine, methionine, and cysteine	Cysteine Biosynthesis	Cystathionine beta-synthase (EC 4.2.1.22) - #1	0.0101464	0.0560623	0.065894	0.157757	0.0543577	0.956522	0.947699	0.872503	0.958068
Amino Acids and Derivatives	Aromatic amino acids and derivatives	Tryptophan synthesis	Phosphoribosylanthranilate isomerase (EC 5.3.1.24) - #1	0	0.0431248	0.0581418	0.0766249	0	0.958658	0.945053	0.928829	1
Amino Acids and Derivatives	Aromatic amino acids and derivatives	Chorismate: Intermediate for synthesis of Tryptophan, PAPA antibiotics, PABA, 3-hydroxyanthranilate and more.	Phosphoribosylanthranilate isomerase (EC 5.3.1.24)	0	0.0431248	0.0581418	0.0766249	0	0.958658	0.945053	0.928829	1
Amino Acids and Derivatives	Aromatic amino acids and derivatives	Aromatic amino acid degradation	4-hydroxyphenylpyruvate dioxygenase (EC 1.13.11.27)	0.0591876	0.104578	0.0794604	0.182548	0.350305	0.958907	0.981219	0.895683	0.784406
Amino Acids and Derivatives	Branched-chain amino acids	Ketoisovalerate oxidoreductase	Acetyl-coenzyme A synthetase (EC 6.2.1.1)	1.15331	1.24523	0.96903	1.1505	1.38612	0.959061	1.09359	1.00131	0.902432
Amino Acids and Derivatives	Aromatic amino acids and derivatives	Tryptophan catabolism	Kynureninase (EC 3.7.1.3)	0.145432	0.194062	0	0.15325	0.129854	0.959274	1.14543	0.993221	1.01379
Amino Acids and Derivatives	Aromatic amino acids and derivatives	Chorismate: Intermediate for synthesis of Tryptophan, PAPA antibiotics, PABA, 3-hydroxyanthranilate and more.	Tryptophan synthase beta chain (EC 4.2.1.20)	0.625698	0.69431	0.707392	0.575814	0.489219	0.959504	0.952153	1.03166	1.09164
Amino Acids and Derivatives	Aromatic amino acids and derivatives	Tryptophan synthesis	Tryptophan synthase beta chain (EC 4.2.1.20) - #1	0.625698	0.69431	0.707392	0.575814	0.489219	0.959504	0.952153	1.03166	1.09164
Amino Acids and Derivatives	Lysine, threonine, methionine, and cysteine	Lysine Biosynthesis DAP Pathway	L,L-diaminopimelate aminotransferase (EC 2.6.1.83)	0.0287483	0.071156	0.131788	0.0754981	0.111735	0.960409	0.908958	0.956532	0.925354
Amino Acids and Derivatives	Alanine, serine, and glycine	Glycine and Serine Utilization	L-serine dehydratase (EC 4.3.1.17)	0	0.0398905	0.0348851	0.0822591	0.093616	0.96164	0.966291	0.923993	0.914398
Amino Acids and Derivatives	Aromatic amino acids and derivatives	Aromatic amino acid degradation	Aromatic ring-opening dioxygenase	0.0507322	0.0905621	0.032947	0.0428198	0	0.963478	1.01722	1.00759	1.05073
Amino Acids and Derivatives	Branched-chain amino acids	Branched chain amino acid degradation regulons	Isovaleryl-CoA dehydrogenase (EC 1.3.99.10)	0.0338215	0.0722341	0.0678321	0.11043	0.214411	0.964175	0.96815	0.93101	0.851295
Amino Acids and Derivatives	Branched-chain amino acids	HMG CoA Synthesis	Isovaleryl-CoA dehydrogenase (EC 1.3.99.10) - #1	0.0338215	0.0722341	0.0678321	0.11043	0.214411	0.964175	0.96815	0.93101	0.851295
Amino Acids and Derivatives	Branched-chain amino acids	Leucine Degradation and HMG-CoA Metabolism	Isovaleryl-CoA dehydrogenase (EC 1.3.99.10) - #2	0.0338215	0.0722341	0.0678321	0.11043	0.214411	0.964175	0.96815	0.93101	0.851295
Amino Acids and Derivatives	Aromatic amino acids and derivatives	Chorismate Synthesis	3-dehydroquinate dehydratase II (EC 4.2.1.10)	0.113302	0.154171	0.195744	0.120572	0.172133	0.96459	0.931054	0.993513	0.949809
Amino Acids and Derivatives	Aromatic amino acids and derivatives	Common Pathway For Synthesis of Aromatic Compounds (DAHP synthase to chorismate)	3-dehydroquinate dehydratase II (EC 4.2.1.10) - #1	0.113302	0.154171	0.195744	0.120572	0.172133	0.96459	0.931054	0.993513	0.949809
Amino Acids and Derivatives	Lysine, threonine, methionine, and cysteine	Lysine Biosynthesis DAP Pathway	Dihydrodipicolinate reductase (EC 1.3.1.26)	0.285792	0.332061	0.300399	0.235509	0.154013	0.965265	0.988767	1.0407	1.11419
Amino Acids and Derivatives	Glutamine, glutamate, aspartate, asparagine; ammonia assimilation	Glutamine, Glutamate, Aspartate and Asparagine Biosynthesis	NADP-specific glutamate dehydrogenase (EC 1.4.1.4) - #2	0.191091	0.233952	0.0910888	0.258046	0.135894	0.965265	1.09165	0.946779	1.04859
Amino Acids and Derivatives	Proline and 4-hydroxyproline	Proline Synthesis	NADP-specific glutamate dehydrogenase (EC 1.4.1.4) - #3	0.191091	0.233952	0.0910888	0.258046	0.135894	0.965265	1.09165	0.946779	1.04859
Amino Acids and Derivatives	Glutamine, glutamate, aspartate, asparagine; ammonia assimilation	Glutamate dehydrogenases	NADP-specific glutamate dehydrogenase (EC 1.4.1.4) - #1	0.191091	0.233952	0.0910888	0.258046	0.135894	0.965265	1.09165	0.946779	1.04859
Amino Acids and Derivatives	Arginine; urea cycle, polyamines	Arginine and Ornithine Degradation	NADP-specific glutamate dehydrogenase (EC 1.4.1.4)	0.191091	0.233952	0.0910888	0.258046	0.135894	0.965265	1.09165	0.946779	1.04859
Amino Acids and Derivatives	Aromatic amino acids and derivatives	Chorismate: Intermediate for synthesis of Tryptophan, PAPA antibiotics, PABA, 3-hydroxyanthranilate and more.	Tryptophan synthase beta chain like (EC 4.2.1.20)	0.0388947	0.0743903	0.12016	0.103669	0.111735	0.966962	0.927452	0.94131	0.93448
Amino Acids and Derivatives	Aromatic amino acids and derivatives	Common Pathway For Synthesis of Aromatic Compounds (DAHP synthase to chorismate)	5-Enolpyruvylshikimate-3-phosphate synthase (EC 2.5.1.19) - #1	0.405858	0.453889	0.587232	0.465384	0.440901	0.966964	0.885729	0.959379	0.97568
Amino Acids and Derivatives	Aromatic amino acids and derivatives	Chorismate Synthesis	5-Enolpyruvylshikimate-3-phosphate synthase (EC 2.5.1.19)	0.405858	0.453889	0.587232	0.465384	0.440901	0.966964	0.885729	0.959379	0.97568
Amino Acids and Derivatives	Branched-chain amino acids	Valine degradation	Enoyl-CoA hydratase (EC 4.2.1.17) - #1	0.845537	0.907778	0.715144	0.803435	0.996557	0.967375	1.07602	1.02335	0.92436
Amino Acids and Derivatives	Branched-chain amino acids	Isoleucine degradation	Enoyl-CoA hydratase (EC 4.2.1.17)	0.845537	0.907778	0.715144	0.803435	0.996557	0.967375	1.07602	1.02335	0.92436
Amino Acids and Derivatives	Arginine; urea cycle, polyamines	Arginine Biosynthesis extended	N-acetyl-gamma-glutamyl-phosphate reductase (EC 1.2.1.38)	0.268881	0.311577	0.306213	0.372983	0.443921	0.967447	0.971419	0.924178	0.878774
Amino Acids and Derivatives	Arginine; urea cycle, polyamines	Arginine Biosynthesis extended	Acetylglutamate kinase (EC 2.7.2.8)	0.226604	0.267374	0.335284	0.188182	0.211391	0.967831	0.918609	1.03234	1.01256
Amino Acids and Derivatives	Amino Acids and Derivatives	Creatine and Creatinine Degradation	N-methylhydantoinase B (EC 3.5.2.14)	0.0744073	0.109968	0.0736463	0.0845128	0.326146	0.967962	1.00071	0.990682	0.810173
Amino Acids and Derivatives	Aromatic amino acids and derivatives	Tryptophan synthesis	Para-aminobenzoate synthase, amidotransferase component (EC 2.6.1.85) - #1	0.187709	0.226405	0.25001	0.157757	0.199311	0.968448	0.95016	1.02587	0.990326
Amino Acids and Derivatives	Aromatic amino acids and derivatives	Chorismate: Intermediate for synthesis of Tryptophan, PAPA antibiotics, PABA, 3-hydroxyanthranilate and more.	Para-aminobenzoate synthase, amidotransferase component (EC 2.6.1.85)	0.187709	0.226405	0.25001	0.157757	0.199311	0.968448	0.95016	1.02587	0.990326
Amino Acids and Derivatives	Histidine Metabolism	Histidine Degradation	Imidazolonepropionase (EC 3.5.2.7)	0.12514	0.161718	0.131788	0.17466	0	0.968513	0.994126	0.957843	1.12514
Amino Acids and Derivatives	Glutamine, glutamate, aspartate, asparagine; ammonia assimilation	Glutamate and Aspartate uptake in Bacteria	Aerobic C4-dicarboxylate transporter for fumarate, L-malate, D-malate, succunate, aspartate	0.0574965	0.0905621	0.0155045	0.121698	0.132874	0.96968	1.04135	0.942764	0.933463
Amino Acids and Derivatives	Arginine; urea cycle, polyamines	Polyamine Metabolism	Putrescine transport system permease protein PotI (TC 3.A.1.11.2)	0.180945	0.21778	0.12016	0.0383124	0.105695	0.969752	1.05426	1.13737	1.06806
Amino Acids and Derivatives	Alanine, serine, and glycine	Alanine biosynthesis	Cysteine desulfurase (EC 2.8.1.7), SufS subfamily	0.399094	0.442029	0.288771	0.282836	0.217431	0.970225	1.0856	1.09063	1.14922
Amino Acids and Derivatives	Branched-chain amino acids	Branched chain amino acid degradation regulons	Electron transfer flavoprotein, beta subunit	0.186018	0.222093	0.122098	0.17804	0.292927	0.970481	1.05697	1.00677	0.917312
Amino Acids and Derivatives	Lysine, threonine, methionine, and cysteine	Lysine fermentation	Electron transfer flavoprotein, beta subunit - #1	0.186018	0.222093	0.122098	0.17804	0.292927	0.970481	1.05697	1.00677	0.917312
Amino Acids and Derivatives	Aromatic amino acids and derivatives	Aromatic amino acid degradation	Tryptophan 2,3-dioxygenase (EC 1.13.11.11)	0.295938	0.335296	0.0930269	0.0991616	0.0392583	0.970525	1.18564	1.17902	1.24698
Amino Acids and Derivatives	Aromatic amino acids and derivatives	Tryptophan catabolism	Tryptophan 2,3-dioxygenase (EC 1.13.11.11) - #1	0.295938	0.335296	0.0930269	0.0991616	0.0392583	0.970525	1.18564	1.17902	1.24698
Amino Acids and Derivatives	Lysine, threonine, methionine, and cysteine	Cysteine Biosynthesis	Sulfate and thiosulfate import ATP-binding protein CysA (EC 3.6.3.25)	0.0372036	0.0679216	0.065894	0.103669	0.117775	0.971236	0.973083	0.939778	0.927918
Amino Acids and Derivatives	Branched-chain amino acids	Branched chain amino acid degradation regulons	Dihydrolipoamide acyltransferase component of branched-chain alpha-keto acid dehydrogenase complex (EC 2.3.1.168)	0.383874	0.42478	0.424435	0.42031	0.193272	0.97129	0.971525	0.974346	1.15973
Amino Acids and Derivatives	Branched-chain amino acids	Leucine Degradation and HMG-CoA Metabolism	Dihydrolipoamide acyltransferase component of branched-chain alpha-keto acid dehydrogenase complex (EC 2.3.1.168) - #2	0.383874	0.42478	0.424435	0.42031	0.193272	0.97129	0.971525	0.974346	1.15973
Amino Acids and Derivatives	Branched-chain amino acids	Valine degradation	Dihydrolipoamide acyltransferase component of branched-chain alpha-keto acid dehydrogenase complex (EC 2.3.1.168) - #3	0.383874	0.42478	0.424435	0.42031	0.193272	0.97129	0.971525	0.974346	1.15973
Amino Acids and Derivatives	Branched-chain amino acids	Isoleucine degradation	Dihydrolipoamide acyltransferase component of branched-chain alpha-keto acid dehydrogenase complex (EC 2.3.1.168) - #1	0.383874	0.42478	0.424435	0.42031	0.193272	0.97129	0.971525	0.974346	1.15973
Amino Acids and Derivatives	Lysine, threonine, methionine, and cysteine	Lysine Biosynthesis DAP Pathway	N-succinyl-L,L-diaminopimelate aminotransferase (EC 2.6.1.17)	0.0439679	0.0733122	0.0213187	0.101415	0.069457	0.97266	1.02218	0.947842	0.976166
Amino Acids and Derivatives	Alanine, serine, and glycine	Alanine biosynthesis	Chaperone protein HscA	0.14205	0.173577	0.127912	0.208465	0.157033	0.973136	1.01253	0.945042	0.98705
Amino Acids and Derivatives	Lysine, threonine, methionine, and cysteine	Cysteine Biosynthesis	Phosphoadenylyl-sulfate reductase [thioredoxin] (EC 1.8.4.8)	0.0186018	0.0463592	0.106593	0.0924006	0.160053	0.973472	0.920484	0.932443	0.878065
Amino Acids and Derivatives	Branched-chain amino acids	Branched-Chain Amino Acid Biosynthesis	2-isopropylmalate synthase (EC 2.3.3.13)	0.735617	0.782716	0.637622	0.649058	0.510358	0.973581	1.05984	1.05249	1.14914
Amino Acids and Derivatives	Branched-chain amino acids	Leucine Biosynthesis	2-isopropylmalate synthase (EC 2.3.3.13) - #1	0.735617	0.782716	0.637622	0.649058	0.510358	0.973581	1.05984	1.05249	1.14914
Amino Acids and Derivatives	Arginine; urea cycle, polyamines	Polyamine Metabolism	5'-methylthioadenosine nucleosidase (EC 3.2.2.16)	0	0.026953	0	0.0236636	0.0875763	0.973754	1	0.976883	0.919476
Amino Acids and Derivatives	Lysine, threonine, methionine, and cysteine	Methionine Biosynthesis	S-adenosylhomocysteine nucleosidase (EC 3.2.2.9)	0	0.026953	0	0.0236636	0.0875763	0.973754	1	0.976883	0.919476
Amino Acids and Derivatives	Lysine, threonine, methionine, and cysteine	Methionine Salvage	5'-methylthioadenosine nucleosidase (EC 3.2.2.16) - #1	0	0.026953	0	0.0236636	0.0875763	0.973754	1	0.976883	0.919476
Amino Acids and Derivatives	Lysine, threonine, methionine, and cysteine	Methionine Degradation	S-adenosylhomocysteine nucleosidase (EC 3.2.2.9) - #1	0	0.026953	0	0.0236636	0.0875763	0.973754	1	0.976883	0.919476
Amino Acids and Derivatives	Lysine, threonine, methionine, and cysteine	Methionine Biosynthesis	Homoserine kinase (EC 2.7.1.39)	0.233368	0.266296	0.298461	0.241143	0.120795	0.973997	0.949869	0.993736	1.10044
Amino Acids and Derivatives	Lysine, threonine, methionine, and cysteine	Threonine and Homoserine Biosynthesis	Homoserine kinase (EC 2.7.1.39) - #1	0.233368	0.266296	0.298461	0.241143	0.120795	0.973997	0.949869	0.993736	1.10044
Amino Acids and Derivatives	Branched-chain amino acids	Branched-Chain Amino Acid Biosynthesis	Threonine dehydratase, catabolic (EC 4.3.1.19) - #1	0	0.0258749	0.0484515	0.102542	0	0.974778	0.953788	0.906995	1
Amino Acids and Derivatives	Lysine, threonine, methionine, and cysteine	Threonine anaerobic catabolism gene cluster	Threonine dehydratase, catabolic (EC 4.3.1.19) - #2	0	0.0258749	0.0484515	0.102542	0	0.974778	0.953788	0.906995	1
Amino Acids and Derivatives	Lysine, threonine, methionine, and cysteine	Threonine degradation	Threonine dehydratase, catabolic (EC 4.3.1.19) - #3	0	0.0258749	0.0484515	0.102542	0	0.974778	0.953788	0.906995	1
Amino Acids and Derivatives	Alanine, serine, and glycine	Glycine and Serine Utilization	Threonine dehydratase, catabolic (EC 4.3.1.19)	0	0.0258749	0.0484515	0.102542	0	0.974778	0.953788	0.906995	1
Amino Acids and Derivatives	Histidine Metabolism	Histidine Biosynthesis	Imidazole glycerol phosphate synthase cyclase subunit (EC 4.1.3.-)	0.258734	0.291093	0.368231	0.216353	0.425802	0.974937	0.919972	1.03484	0.882826
Amino Acids and Derivatives	Aromatic amino acids and derivatives	Chorismate Synthesis	Chorismate mutase I (EC 5.4.99.5)	0.0845537	0.112125	0.153107	0.173533	0.105695	0.975209	0.940549	0.924178	0.980879
Amino Acids and Derivatives	Aromatic amino acids and derivatives	Phenylalanine and Tyrosine Branches from Chorismate	Chorismate mutase I (EC 5.4.99.5) - #1	0.0845537	0.112125	0.153107	0.173533	0.105695	0.975209	0.940549	0.924178	0.980879
Amino Acids and Derivatives	Branched-chain amino acids	Branched-Chain Amino Acid Biosynthesis	3-isopropylmalate dehydratase large subunit (EC 4.2.1.33)	0.782967	0.827997	0.833366	0.709907	0.646252	0.975367	0.972511	1.04273	1.08305
Amino Acids and Derivatives	Branched-chain amino acids	Leucine Biosynthesis	3-isopropylmalate dehydratase large subunit (EC 4.2.1.33) - #1	0.782967	0.827997	0.833366	0.709907	0.646252	0.975367	0.972511	1.04273	1.08305
Amino Acids and Derivatives	Aromatic amino acids and derivatives	Chorismate: Intermediate for synthesis of Tryptophan, PAPA antibiotics, PABA, 3-hydroxyanthranilate and more.	Tryptophan synthase alpha chain (EC 4.2.1.20)	0.216458	0.24689	0.426373	0.140855	0.250649	0.975594	0.852833	1.06627	0.972661
Amino Acids and Derivatives	Aromatic amino acids and derivatives	Tryptophan synthesis	Tryptophan synthase alpha chain (EC 4.2.1.20) - #1	0.216458	0.24689	0.426373	0.140855	0.250649	0.975594	0.852833	1.06627	0.972661
Amino Acids and Derivatives	Lysine, threonine, methionine, and cysteine	Cysteine Biosynthesis	Sulfite reductase [NADPH] flavoprotein alpha-component (EC 1.8.1.2)	0	0.0247968	0.0562037	0.00901469	0	0.975803	0.946787	0.991066	1
Amino Acids and Derivatives	Aromatic amino acids and derivatives	Aromatic amino acid degradation	Putative fumarylacetoacetate (FAA) hydrolase	0.0118375	0.0366561	0	0.0112684	0.0271788	0.976059	1.01184	1.00056	0.985065
Amino Acids and Derivatives	Lysine, threonine, methionine, and cysteine	Lysine Biosynthesis DAP Pathway	N-acetyl-L,L-diaminopimelate deacetylase (EC 3.5.1.47)	0	0.0237187	0.0232567	0.0935274	0	0.976831	0.977272	0.914472	1
Amino Acids and Derivatives	Alanine, serine, and glycine	Alanine biosynthesis	Ferredoxin, 2Fe-2S	0.0710251	0.0959527	0.0833366	0.105923	0.202331	0.977255	0.988636	0.968445	0.89079
Amino Acids and Derivatives	Proline and 4-hydroxyproline	Proline, 4-hydroxyproline uptake and utilization	Proline dehydrogenase (EC 1.5.99.8) (Proline oxidase)	0.12514	0.150937	0.298461	0.113811	0.199311	0.977586	0.866518	1.01017	0.938155
Amino Acids and Derivatives	Glutamine, glutamate, aspartate, asparagine; ammonia assimilation	Glutamine, Glutamate, Aspartate and Asparagine Biosynthesis	Glutamine synthetase type I (EC 6.3.1.2)	0.789732	0.829075	0.726772	0.571306	0.918041	0.97849	1.03646	1.13901	0.933104
Amino Acids and Derivatives	Glutamine, glutamate, aspartate, asparagine; ammonia assimilation	Glutamine synthetases	Glutamine synthetase type I (EC 6.3.1.2) - #1	0.789732	0.829075	0.726772	0.571306	0.918041	0.97849	1.03646	1.13901	0.933104
Amino Acids and Derivatives	Histidine Metabolism	Histidine Biosynthesis	Phosphoribosyl-ATP pyrophosphatase (EC 3.6.1.31)	0.0304393	0.0528279	0	0.103669	0.0664372	0.978735	1.03044	0.933649	0.966245
Amino Acids and Derivatives	Alanine, serine, and glycine	Glycine Biosynthesis	2-amino-3-ketobutyrate coenzyme A ligase (EC 2.3.1.29)	0.160652	0.185437	0.12985	0.350446	0.199311	0.979092	1.02726	0.859458	0.967765
Amino Acids and Derivatives	Alanine, serine, and glycine	Glycine and Serine Utilization	2-amino-3-ketobutyrate coenzyme A ligase (EC 2.3.1.29) - #1	0.160652	0.185437	0.12985	0.350446	0.199311	0.979092	1.02726	0.859458	0.967765
Amino Acids and Derivatives	Lysine, threonine, methionine, and cysteine	Lysine degradation	L-pipecolate dehydrogenase (EC 1.5.99.3)	0	0.0204843	0.00581418	0	0	0.979927	0.994219	1	1
Amino Acids and Derivatives	Arginine; urea cycle, polyamines	Urea carboxylase and Allophanate hydrolase cluster	Allophanate hydrolase 2 subunit 1 (EC 3.5.1.54)	0	0.0204843	0	0.013522	0.0724769	0.979927	1	0.986658	0.932421
Amino Acids and Derivatives	Glutamine, glutamate, aspartate, asparagine; ammonia assimilation	Glutamate and Aspartate uptake in Bacteria	Glutamate Aspartate transport ATP-binding protein GltL (TC 3.A.1.3.4)	0.0202929	0.0409686	0.0736463	0.0292978	0.0150994	0.980138	0.950306	0.991251	1.00512
Amino Acids and Derivatives	Lysine, threonine, methionine, and cysteine	Lysine degradation	Lysine 2,3-aminomutase (EC 5.4.3.2)	0.0710251	0.0927184	0.106593	0.048454	0.093616	0.980147	0.967858	1.02153	0.979343
Amino Acids and Derivatives	Lysine, threonine, methionine, and cysteine	Lysine fermentation	Lysine 2,3-aminomutase (EC 5.4.3.2) - #1	0.0710251	0.0927184	0.106593	0.048454	0.093616	0.980147	0.967858	1.02153	0.979343
Amino Acids and Derivatives	Branched-chain amino acids	Branched-Chain Amino Acid Biosynthesis	Acetolactate synthase large subunit (EC 2.2.1.6)	0.967295	1.00589	1.22679	0.892455	0.637193	0.980761	0.883466	1.03955	1.20163
Amino Acids and Derivatives	Alanine, serine, and glycine	Alanine biosynthesis	Iron binding protein IscA for iron-sulfur cluster assembly	0	0.0194062	0.0697701	0.0495808	0	0.980963	0.93478	0.952761	1
Amino Acids and Derivatives	Arginine; urea cycle, polyamines	Arginine Biosynthesis extended	N-succinyl-L,L-diaminopimelate desuccinylase (EC 3.5.1.18)	0.0963912	0.117515	0.184116	0.212972	0.22951	0.981097	0.925916	0.903888	0.89173
Amino Acids and Derivatives	Lysine, threonine, methionine, and cysteine	Lysine Biosynthesis DAP Pathway	N-succinyl-L,L-diaminopimelate desuccinylase (EC 3.5.1.18) - #1	0.0963912	0.117515	0.184116	0.212972	0.22951	0.981097	0.925916	0.903888	0.89173
Amino Acids and Derivatives	Lysine, threonine, methionine, and cysteine	Lysine Biosynthesis DAP Pathway	2,3,4,5-tetrahydropyridine-2,6-dicarboxylate N-acetyltransferase (EC 2.3.1.89)	0.00507322	0.0237187	0	0.0394393	0.0452981	0.981787	1.00507	0.966938	0.961518
Amino Acids and Derivatives	Branched-chain amino acids	HMG CoA Synthesis	Acetoacetyl-CoA synthetase (EC 6.2.1.16) - #1	0.116684	0.136921	0.174425	0.144235	0	0.9822	0.950834	0.975922	1.11668
Amino Acids and Derivatives	Branched-chain amino acids	Leucine Degradation and HMG-CoA Metabolism	Acetoacetyl-CoA synthetase (EC 6.2.1.16) - #2	0.116684	0.136921	0.174425	0.144235	0	0.9822	0.950834	0.975922	1.11668
Amino Acids and Derivatives	Branched-chain amino acids	Branched chain amino acid degradation regulons	Acetoacetyl-CoA synthetase (EC 6.2.1.16)	0.116684	0.136921	0.174425	0.144235	0	0.9822	0.950834	0.975922	1.11668
Amino Acids and Derivatives	Arginine; urea cycle, polyamines	Arginine and Ornithine Degradation	Ornithine aminotransferase (EC 2.6.1.13)	0.0608787	0.0797809	0.0600798	0.206211	0.0754968	0.982494	1.00075	0.879513	0.986408
Amino Acids and Derivatives	Alanine, serine, and glycine	Alanine biosynthesis	Cysteine desulfurase (EC 2.8.1.7)	0.952075	0.98648	0.738401	0.893582	0.788186	0.98268	1.12291	1.03089	1.09165
Amino Acids and Derivatives	Proline and 4-hydroxyproline	Proline, 4-hydroxyproline uptake and utilization	Putative oxidoreductase in 4-hydroxyproline catabolic gene cluster	0.0490412	0.0657654	0	0.0169026	0	0.984308	1.04904	1.0316	1.04904
Amino Acids and Derivatives	Lysine, threonine, methionine, and cysteine	Methionine Salvage	5-methylthioribose kinase (EC 2.7.1.100)	0	0.0150937	0	0	0	0.985131	1	1	1
Amino Acids and Derivatives	Proline and 4-hydroxyproline	Proline, 4-hydroxyproline uptake and utilization	Ureidoglycolate/malate/sulfolactate dehydrogenase family (EC 1.1.1.-)	0	0.0150937	0	0	0	0.985131	1	1	1
Amino Acids and Derivatives	Aromatic amino acids and derivatives	Chorismate: Intermediate for synthesis of Tryptophan, PAPA antibiotics, PABA, 3-hydroxyanthranilate and more.	Aminodeoxychorismate lyase (EC 4.1.3.38)	0	0.0150937	0.12985	0	0	0.985131	0.885073	1	1
Amino Acids and Derivatives	Aromatic amino acids and derivatives	Phenylalanine and Tyrosine Branches from Chorismate	Prephenate and/or arogenate dehydrogenase (unknown specificity) (EC 1.3.1.12)(EC 1.3.1.43) - #1	0	0.0150937	0	0.0405661	0	0.985131	1	0.961015	1
Amino Acids and Derivatives	Aromatic amino acids and derivatives	Chorismate Synthesis	Prephenate and/or arogenate dehydrogenase (unknown specificity) (EC 1.3.1.12)(EC 1.3.1.43)	0	0.0150937	0	0.0405661	0	0.985131	1	0.961015	1
Amino Acids and Derivatives	Proline and 4-hydroxyproline	Proline, 4-hydroxyproline uptake and utilization	Not a Proline racemase, nor 4-hydroxyproline epimerase [missing catalytic residues]	0.0372036	0.0528279	0	0.0101415	0	0.98516	1.0372	1.02679	1.0372
Amino Acids and Derivatives	Aromatic amino acids and derivatives	Common Pathway For Synthesis of Aromatic Compounds (DAHP synthase to chorismate)	2-keto-3-deoxy-D-arabino-heptulosonate-7-phosphate synthase I beta (EC 2.5.1.54) - #1	0.0591876	0.0743903	0.164735	0.152123	0.135894	0.98585	0.909381	0.919336	0.93247
Amino Acids and Derivatives	Aromatic amino acids and derivatives	Chorismate Synthesis	2-keto-3-deoxy-D-arabino-heptulosonate-7-phosphate synthase I beta (EC 2.5.1.54)	0.0591876	0.0743903	0.164735	0.152123	0.135894	0.98585	0.909381	0.919336	0.93247
Amino Acids and Derivatives	Alanine, serine, and glycine	Alanine biosynthesis	Cysteine desulfurase (EC 2.8.1.7), NifS subfamily	0	0.0140156	0.0232567	0.0202831	0.0150994	0.986178	0.977272	0.98012	0.985125
Amino Acids and Derivatives	Amino Acids and Derivatives	Creatine and Creatinine Degradation	Dimethylglycine dehydrogenase (EC 1.5.99.2)	0.00338215	0.0172499	0	0.0112684	0.0452981	0.986367	1.00338	0.992202	0.959901
Amino Acids and Derivatives	Alanine, serine, and glycine	Glycine cleavage system	Dihydrolipoamide dehydrogenase (EC 1.8.1.4)	0.0558055	0.0700778	0.0910888	0.297485	0.166093	0.986662	0.967662	0.813732	0.905421
Amino Acids and Derivatives	Branched-chain amino acids	Leucine Degradation and HMG-CoA Metabolism	Dihydrolipoamide dehydrogenase (EC 1.8.1.4) - #1	0.0558055	0.0700778	0.0910888	0.297485	0.166093	0.986662	0.967662	0.813732	0.905421
Amino Acids and Derivatives	Arginine; urea cycle, polyamines	Putrescine utilization pathways	Gamma-glutamyl-aminobutyraldehyde dehydrogenase (EC 1.2.1.-)	0.0135286	0.026953	0.00775224	0	0	0.986928	1.00573	1.01353	1.01353
Amino Acids and Derivatives	Histidine Metabolism	Histidine Biosynthesis	Phosphoribosyl-AMP cyclohydrolase (EC 3.5.4.19)	0.067643	0.080859	0.0755843	0.105923	0	0.987773	0.992617	0.965387	1.06764
Amino Acids and Derivatives	Arginine; urea cycle, polyamines	Polyamine Metabolism	Biosynthetic arginine decarboxylase (EC 4.1.1.19) - #1	0.108229	0.121828	0.0813985	0.172406	0.160053	0.987878	1.02481	0.94526	0.955326
Amino Acids and Derivatives	Arginine; urea cycle, polyamines	Arginine and Ornithine Degradation	Biosynthetic arginine decarboxylase (EC 4.1.1.19)	0.108229	0.121828	0.0813985	0.172406	0.160053	0.987878	1.02481	0.94526	0.955326
Amino Acids and Derivatives	Arginine; urea cycle, polyamines	Arginine Biosynthesis extended	Glutamate N-acetyltransferase (EC 2.3.1.35)	0.392329	0.408608	0.387612	0.28509	0.353325	0.988444	1.0034	1.08345	1.02882
Amino Acids and Derivatives	Arginine; urea cycle, polyamines	Arginine and Ornithine Degradation	N-carbamoylputrescine amidase (3.5.1.53)	0.150506	0.163874	0.0697701	0.120572	0.111735	0.988514	1.07547	1.02671	1.03487
Amino Acids and Derivatives	Arginine; urea cycle, polyamines	Polyamine Metabolism	N-carbamoylputrescine amidase (3.5.1.53) - #1	0.150506	0.163874	0.0697701	0.120572	0.111735	0.988514	1.07547	1.02671	1.03487
Amino Acids and Derivatives	Aromatic amino acids and derivatives	Chorismate Synthesis	2-keto-3-deoxy-D-arabino-heptulosonate-7-phosphate synthase I alpha (EC 2.5.1.54)	0.111611	0.123984	0.135664	0.126206	0.108715	0.988992	0.97882	0.987041	1.00261
Amino Acids and Derivatives	Aromatic amino acids and derivatives	Common Pathway For Synthesis of Aromatic Compounds (DAHP synthase to chorismate)	2-keto-3-deoxy-D-arabino-heptulosonate-7-phosphate synthase I alpha (EC 2.5.1.54) - #1	0.111611	0.123984	0.135664	0.126206	0.108715	0.988992	0.97882	0.987041	1.00261
Amino Acids and Derivatives	Histidine Metabolism	Histidine Biosynthesis	ATP phosphoribosyltransferase catalytic subunit (EC 2.4.2.17)	0.0541144	0.0657654	0.0872127	0.0901469	0.0905961	0.989068	0.969557	0.966947	0.966549
Amino Acids and Derivatives	Lysine, threonine, methionine, and cysteine	Methionine Biosynthesis	5-methyltetrahydrofolate--homocysteine methyltransferase (EC 2.1.1.13)	1.48476	1.51153	1.82565	1.67561	1.34988	0.989344	0.879359	0.928673	1.0574
Amino Acids and Derivatives	Arginine; urea cycle, polyamines	Putrescine utilization pathways	Gamma-aminobutyrate:alpha-ketoglutarate aminotransferase (EC 2.6.1.19)	0.223222	0.236108	0.193806	0.162264	0.211391	0.989575	1.02464	1.05245	1.00977
Amino Acids and Derivatives	Arginine; urea cycle, polyamines	Arginine and Ornithine Degradation	Arginine/ornithine ABC transporter, ATP-binding protein AotP	0	0.00970309	0	0	0	0.99039	1	1	1
Amino Acids and Derivatives	Glutamine, glutamate, aspartate, asparagine; ammonia assimilation	Glutamine, Glutamate, Aspartate and Asparagine Biosynthesis	Glutamine amidotransferase protein GlxB (EC 2.4.2.-)	0	0.00970309	0.0155045	0	0.00603974	0.99039	0.984732	1	0.993997
Amino Acids and Derivatives	Aromatic amino acids and derivatives	Aromatic amino acid degradation	Aromatic-L-amino-acid decarboxylase (EC 4.1.1.28)	0.0608787	0.071156	0.0290709	0.041693	0.0362384	0.990405	1.03091	1.01842	1.02378
Amino Acids and Derivatives	Histidine Metabolism	Histidine Biosynthesis	ATP phosphoribosyltransferase regulatory subunit (EC 2.4.2.17)	0.0321304	0.0420467	0.125974	0.164518	0.23253	0.990484	0.916656	0.886315	0.837408
Amino Acids and Derivatives	Proline and 4-hydroxyproline	Proline, 4-hydroxyproline uptake and utilization	Ketoglutarate semialdehyde dehydrogenase (EC 1.2.1.26)	0.0642608	0.0743903	0	0	0	0.990572	1.06426	1.06426	1.06426
Amino Acids and Derivatives	Amino Acids and Derivatives	Creatine and Creatinine Degradation	N-methylhydantoinase A (EC 3.5.2.14)	0.0794805	0.089484	0	0	0.401643	0.990818	1.07948	1.07948	0.770154
Amino Acids and Derivatives	Glutamine, glutamate, aspartate, asparagine; ammonia assimilation	Poly-gamma-glutamate biosynthesis	Gamma-glutamyltranspeptidase (EC 2.3.2.2)	0.292556	0.30403	0.375984	0.467637	0.576795	0.991201	0.939369	0.880705	0.819736
Amino Acids and Derivatives	Arginine; urea cycle, polyamines	Polyamine Metabolism	Putrescine transport ATP-binding protein PotG (TC 3.A.1.11.2)	0.211384	0.222093	0.348851	0.169026	0.105695	0.991238	0.898086	1.03623	1.09559
Amino Acids and Derivatives	Aromatic amino acids and derivatives	Chorismate: Intermediate for synthesis of Tryptophan, PAPA antibiotics, PABA, 3-hydroxyanthranilate and more.	2-keto-3-deoxy-D-arabino-heptulosonate-7-phosphate synthase II PhzC (EC 2.5.1.54)	0	0.00862496	0.00775224	0.00338051	0	0.991449	0.992307	0.996631	1
Amino Acids and Derivatives	Aromatic amino acids and derivatives	Tryptophan catabolism	2-amino-3-carboxymuconate-6-semialdehyde decarboxylase (EC 4.1.1.45)	0	0.00862496	0	0.0225367	0.0452981	0.991449	1	0.97796	0.956665
Amino Acids and Derivatives	Lysine, threonine, methionine, and cysteine	Methionine Biosynthesis	Transcriptional activator MetR	0.0118375	0.0204843	0	0	0	0.991527	1.01184	1.01184	1.01184
Amino Acids and Derivatives	Lysine, threonine, methionine, and cysteine	Lysine degradation	Glutarate-semialdehyde dehydrogenase (EC 1.2.1.20)	0.00507322	0.0129374	0.00581418	0.00225367	0	0.992236	0.999263	1.00281	1.00507
Amino Acids and Derivatives	Glutamine, glutamate, aspartate, asparagine; ammonia assimilation	Glutamate and Aspartate uptake in Bacteria	Sodium/glutamate symport protein	0	0.00754684	0.0213187	0	0	0.99251	0.979126	1	1
Amino Acids and Derivatives	Glutamine, glutamate, aspartate, asparagine; ammonia assimilation	Glutamine, Glutamate, Aspartate and Asparagine Biosynthesis	Glutamate synthase [NADPH] putative GlxC chain (EC 1.4.1.13)	0	0.00754684	0.00581418	0.0146489	0	0.99251	0.994219	0.985563	1
Amino Acids and Derivatives	Aromatic amino acids and derivatives	Aromatic amino acid degradation	Phenylalanine-4-hydroxylase (EC 1.14.16.1)	0	0.00754684	0	0.0304246	0.0150994	0.99251	1	0.970474	0.985125
Amino Acids and Derivatives	Branched-chain amino acids	Branched chain amino acid degradation regulons	Branched-chain acyl-CoA dehydrogenase (EC 1.3.99.12)	0	0.00754684	0.00387612	0.00788786	0.0754968	0.99251	0.996139	0.992174	0.929803
Amino Acids and Derivatives	Branched-chain amino acids	Valine degradation	Branched-chain acyl-CoA dehydrogenase (EC 1.3.99.12) - #3	0	0.00754684	0.00387612	0.00788786	0.0754968	0.99251	0.996139	0.992174	0.929803
Amino Acids and Derivatives	Branched-chain amino acids	Isoleucine degradation	Branched-chain acyl-CoA dehydrogenase (EC 1.3.99.12) - #1	0	0.00754684	0.00387612	0.00788786	0.0754968	0.99251	0.996139	0.992174	0.929803
Amino Acids and Derivatives	Branched-chain amino acids	Leucine Degradation and HMG-CoA Metabolism	Branched-chain acyl-CoA dehydrogenase (EC 1.3.99.12) - #2	0	0.00754684	0.00387612	0.00788786	0.0754968	0.99251	0.996139	0.992174	0.929803
Amino Acids and Derivatives	Alanine, serine, and glycine	Glycine and Serine Utilization	Glycine dehydrogenase [decarboxylating] (glycine cleavage system P2 protein) (EC 1.4.4.2)	0.0118375	0.0194062	0	0.00788786	0.141934	0.992575	1.01184	1.00392	0.886074
Amino Acids and Derivatives	Alanine, serine, and glycine	Glycine cleavage system	Glycine dehydrogenase [decarboxylating] (glycine cleavage system P2 protein) (EC 1.4.4.2) - #1	0.0118375	0.0194062	0	0.00788786	0.141934	0.992575	1.01184	1.00392	0.886074
Amino Acids and Derivatives	Aromatic amino acids and derivatives	Aromatic amino acid degradation	5-oxopent-3-ene-1,2,5-tricarboxylate decarboxylase.	0.0186018	0.0258749	0.0348851	0.0574687	0.0573775	0.99291	0.984266	0.963245	0.963328
Amino Acids and Derivatives	Arginine; urea cycle, polyamines	Urea decomposition	Urea ABC transporter, permease protein UrtC	0.0338215	0.0409686	0.0484515	0.0642297	0.069457	0.993134	0.986046	0.971427	0.966679
Amino Acids and Derivatives	Lysine, threonine, methionine, and cysteine	Methionine Degradation	2-Oxobutyrate dehydrogenase E1 (EC:1.2.4.1)	0.0135286	0.0204843	0	0.0225367	0.024159	0.993184	1.01353	0.99119	0.98962
Amino Acids and Derivatives	Branched-chain amino acids	Valine degradation	3-hydroxyisobutyrate dehydrogenase (EC 1.1.1.31) - #1	0.0253661	0.0323436	0	0.0292978	0.150994	0.993241	1.02537	0.99618	0.890853
Amino Acids and Derivatives	Branched-chain amino acids	Branched chain amino acid degradation regulons	3-hydroxyisobutyrate dehydrogenase (EC 1.1.1.31)	0.0253661	0.0323436	0	0.0292978	0.150994	0.993241	1.02537	0.99618	0.890853
Amino Acids and Derivatives	Aromatic amino acids and derivatives	Aromatic amino acid degradation	3,4-dihydroxyphenylacetate 2,3-dioxygenase (EC 1.13.11.15)	0.0287483	0.035578	0.0174425	0.0225367	0.00905961	0.993405	1.01111	1.00607	1.01951
Amino Acids and Derivatives	Proline and 4-hydroxyproline	Proline, 4-hydroxyproline uptake and utilization	Proline iminopeptidase (EC 3.4.11.5)	0.0321304	0.0388123	0	0.0777517	0.0875763	0.993568	1.03213	0.95767	0.949019
Amino Acids and Derivatives	Amino Acids and Derivatives	Creatine and Creatinine Degradation	N-methylhydantoinase (ATP-hydrolyzing) (EC 3.5.2.14)	0	0.00646872	0	0	0	0.993573	1	1	1
Amino Acids and Derivatives	Arginine; urea cycle, polyamines	Arginine and Ornithine Degradation	Arginase (EC 3.5.3.1)	0.00338215	0.00970309	0	0.0225367	0.00905961	0.99374	1.00338	0.981268	0.994374
Amino Acids and Derivatives	Glutamine, glutamate, aspartate, asparagine; ammonia assimilation	Glutamine, Glutamate, Aspartate and Asparagine Biosynthesis	Aspartate aminotransferase (EC 2.6.1.1) - #1	0.965604	0.977855	0.920578	0.99387	1.20191	0.993805	1.02344	0.985823	0.892682
Amino Acids and Derivatives	Lysine, threonine, methionine, and cysteine	Threonine and Homoserine Biosynthesis	Aspartate aminotransferase (EC 2.6.1.1) - #2	0.965604	0.977855	0.920578	0.99387	1.20191	0.993805	1.02344	0.985823	0.892682
Amino Acids and Derivatives	Glutamine, glutamate, aspartate, asparagine; ammonia assimilation	Aspartate aminotransferase	Aspartate aminotransferase (EC 2.6.1.1)	0.965604	0.977855	0.920578	0.99387	1.20191	0.993805	1.02344	0.985823	0.892682
Amino Acids and Derivatives	Arginine; urea cycle, polyamines	Arginine and Ornithine Degradation	Arginine deiminase (EC 3.5.3.6) - #1	0	0.0053906	0	0.0112684	0	0.994638	1	0.988857	1
Amino Acids and Derivatives	Arginine; urea cycle, polyamines	Arginine Deiminase Pathway	Arginine deiminase (EC 3.5.3.6)	0	0.0053906	0	0.0112684	0	0.994638	1	0.988857	1
Amino Acids and Derivatives	Aromatic amino acids and derivatives	Tryptophan catabolism	4-oxalocrotonate decarboxylase (EC 4.1.1.77)	0	0.0053906	0.0426373	0.0225367	0	0.994638	0.959106	0.97796	1
Amino Acids and Derivatives	Aromatic amino acids and derivatives	Tryptophan catabolism	3-hydroxyanthranilate 3,4-dioxygenase (EC 1.13.11.6)	0	0.0053906	0.00581418	0.0225367	0.00905961	0.994638	0.994219	0.97796	0.991022
Amino Acids and Derivatives	Branched-chain amino acids	Isoleucine degradation	Acyl-CoA dehydrogenase, short-chain specific (EC 1.3.99.2)	0.258734	0.265218	0.201558	0.423691	0.413722	0.994876	1.04759	0.884135	0.890369
Amino Acids and Derivatives	Lysine, threonine, methionine, and cysteine	Lysine degradation	Lysine/cadaverine antiporter membrane protein CadB	0.0186018	0.0237187	0	0.0259172	0	0.995002	1.0186	0.992869	1.0186
Amino Acids and Derivatives	Aromatic amino acids and derivatives	Tryptophan catabolism	Kynurenine 3-monooxygenase (EC 1.14.13.9)	0.00507322	0.00970309	0.0193806	0.101415	0.0181192	0.995415	0.985965	0.912529	0.987186
Amino Acids and Derivatives	Lysine, threonine, methionine, and cysteine	Methionine Biosynthesis	Homocysteine S-methyltransferase (EC 2.1.1.10)	0	0.00431248	0	0	0	0.995706	1	1	1
Amino Acids and Derivatives	Lysine, threonine, methionine, and cysteine	Cysteine Biosynthesis	Sulfate transporter, CysZ-type	0	0.00431248	0	0	0	0.995706	1	1	1
Amino Acids and Derivatives	Arginine; urea cycle, polyamines	Arginine and Ornithine Degradation	Succinylornithine transaminase (EC 2.6.1.81)	0.023675	0.0280311	0	0.0867664	0.0573775	0.995763	1.02368	0.941946	0.968126
Amino Acids and Derivatives	Arginine; urea cycle, polyamines	Urea decomposition	Urea ABC transporter, permease protein UrtB	0.0473501	0.0517498	0	0.0912738	0.0483179	0.995817	1.04735	0.95975	0.999077
Amino Acids and Derivatives	Proline and 4-hydroxyproline	Proline, 4-hydroxyproline uptake and utilization	Hypothetical, similar to sarcosine oxidase alpha subunit, 2Fe-2S domain	0.00338215	0.00754684	0.00581418	0.0259172	0.00301987	0.995866	0.997582	0.978034	1.00036
Amino Acids and Derivatives	Branched-chain amino acids	Isoleucine degradation	Probable acyl-CoA dehydrogenase (EC 1.3.99.3)	0.045659	0.0495935	0.0445754	0.061976	0.0483179	0.996251	1.00104	0.984635	0.997464
Amino Acids and Derivatives	Branched-chain amino acids	Valine degradation	Probable acyl-CoA dehydrogenase (EC 1.3.99.3) - #1	0.045659	0.0495935	0.0445754	0.061976	0.0483179	0.996251	1.00104	0.984635	0.997464
Amino Acids and Derivatives	Arginine; urea cycle, polyamines	Urea decomposition	Urease alpha subunit (EC 3.5.1.5)	0.0608787	0.0646872	0.127912	0.171279	0.114755	0.996423	0.940569	0.905744	0.95167
Amino Acids and Derivatives	Arginine; urea cycle, polyamines	Urease subunits	Urease alpha subunit (EC 3.5.1.5) - #1	0.0608787	0.0646872	0.127912	0.171279	0.114755	0.996423	0.940569	0.905744	0.95167
Amino Acids and Derivatives	Arginine; urea cycle, polyamines	Urea carboxylase and Allophanate hydrolase cluster	Urea carboxylase (EC 6.3.4.6) without Allophanate hydrolase 2 domains	0.00507322	0.00862496	0.00581418	0.0157757	0	0.996479	0.999263	0.989464	1.00507
Amino Acids and Derivatives	Lysine, threonine, methionine, and cysteine	Methionine Biosynthesis	Cystathionine beta-lyase (EC 4.4.1.8)	0.0321304	0.035578	0	0.0833859	0.093616	0.996671	1.03213	0.95269	0.943778
Amino Acids and Derivatives	Lysine, threonine, methionine, and cysteine	Lysine Biosynthesis DAP Pathway	LL-diaminopimelate aminotransferase, predicted alternative	0	0.00323436	0.0155045	0.0169026	0	0.996776	0.984732	0.983378	1
Amino Acids and Derivatives	Glutamine, glutamate, aspartate, asparagine; ammonia assimilation	Glutamine, Glutamate, Aspartate and Asparagine Biosynthesis	L-asparaginase I, cytoplasmic (EC 3.5.1.1)	0	0.00323436	0	0.0180294	0	0.996776	1	0.98229	1
Amino Acids and Derivatives	Lysine, threonine, methionine, and cysteine	Methionine Salvage	Methylthioribulose-1-phosphate dehydratase (EC 4.2.1.109)	0	0.00323436	0	0	0.0150994	0.996776	1	1	0.985125
Amino Acids and Derivatives	Branched-chain amino acids	Branched-Chain Amino Acid Biosynthesis	3-isopropylmalate dehydratase small subunit (EC 4.2.1.33)	0.255352	0.258749	0.31978	0.264807	0.22951	0.997302	0.951183	0.992525	1.02102
Amino Acids and Derivatives	Branched-chain amino acids	Leucine Biosynthesis	3-isopropylmalate dehydratase small subunit (EC 4.2.1.33) - #1	0.255352	0.258749	0.31978	0.264807	0.22951	0.997302	0.951183	0.992525	1.02102
Amino Acids and Derivatives	Arginine; urea cycle, polyamines	Arginine and Ornithine Degradation	Ornithine carbamoyltransferase (EC 2.1.3.3) - #2	0.273954	0.277077	0.284895	0.385378	0.298967	0.997555	0.991485	0.919571	0.980744
Amino Acids and Derivatives	Arginine; urea cycle, polyamines	Arginine Deiminase Pathway	Ornithine carbamoyltransferase (EC 2.1.3.3) - #1	0.273954	0.277077	0.284895	0.385378	0.298967	0.997555	0.991485	0.919571	0.980744
Amino Acids and Derivatives	Arginine; urea cycle, polyamines	Arginine Biosynthesis extended	Ornithine carbamoyltransferase (EC 2.1.3.3)	0.273954	0.277077	0.284895	0.385378	0.298967	0.997555	0.991485	0.919571	0.980744
Amino Acids and Derivatives	Alanine, serine, and glycine	Alanine biosynthesis	Alanine racemase, biosynthetic (EC 5.1.1.1)	0.0202929	0.0226405	0	0.00450735	0	0.997704	1.02029	1.01571	1.02029
Amino Acids and Derivatives	Alanine, serine, and glycine	Alanine biosynthesis	Alanine racemase, catabolic (EC 5.1.1.1)	0.0558055	0.0582185	0.104655	0.0439466	0.208371	0.99772	0.955778	1.01136	0.873743
Amino Acids and Derivatives	Aromatic amino acids and derivatives	Chorismate Synthesis	Quinate/shikimate dehydrogenase [Pyrroloquinoline-quinone] (EC 1.1.99.25)	0	0.00215624	0	0	0	0.997848	1	1	1
Amino Acids and Derivatives	Lysine, threonine, methionine, and cysteine	Methionine Salvage	Glutamine-dependent 2-keto-4-methylthiobutyrate transaminase	0	0.00215624	0	0	0	0.997848	1	1	1
Amino Acids and Derivatives	Lysine, threonine, methionine, and cysteine	Lysine fermentation	3-keto-5-aminohexanoate cleavage enzyme	0	0.00215624	0	0	0	0.997848	1	1	1
Amino Acids and Derivatives	Arginine; urea cycle, polyamines	Arginine and Ornithine Degradation	Histidine ABC transporter, ATP-binding protein HisP (TC 3.A.1.3.1)	0	0.00215624	0	0	0	0.997848	1	1	1
Amino Acids and Derivatives	Arginine; urea cycle, polyamines	Urea decomposition	Urea carboxylase-related ABC transporter, permease protein	0	0.00215624	0.00581418	0.00225367	0	0.997848	0.994219	0.997751	1
Amino Acids and Derivatives	Arginine; urea cycle, polyamines	Polyamine Metabolism	Carboxynorspermidine dehydrogenase, putative (EC 1.1.1.-)	0	0.00215624	0.00193806	0.00338051	0	0.997848	0.998066	0.996631	1
Amino Acids and Derivatives	Glutamine, glutamate, aspartate, asparagine; ammonia assimilation	Glutamine, Glutamate, Aspartate and Asparagine Biosynthesis	Glutamine synthetase (EC 6.3.1.2)	0	0.00215624	0	0	0.00905961	0.997848	1	1	0.991022
Amino Acids and Derivatives	Proline and 4-hydroxyproline	Proline, 4-hydroxyproline uptake and utilization	Dipeptidyl peptidase IV in 4-hydroxyproline catabolic gene cluster	0	0.00215624	0	0	0.0181192	0.997848	1	1	0.982203
Amino Acids and Derivatives	Alanine, serine, and glycine	Glycine and Serine Utilization	D-serine/D-alanine/glycine transporter	0	0.00215624	0	0	0.0634173	0.997848	1	1	0.940365
Amino Acids and Derivatives	Lysine, threonine, methionine, and cysteine	Threonine degradation	FIG003492: Threonine dehydrogenase and related Zn-dependent dehydrogenases	0	0.00215624	0	0.00338051	0.0845564	0.997848	1	0.996631	0.922036
Amino Acids and Derivatives	Histidine Metabolism	Histidine Biosynthesis	Histidinol-phosphatase (EC 3.1.3.15)	0.0422769	0.0442029	0.0484515	0.136347	0.0332186	0.998155	0.994111	0.917217	1.00877
Amino Acids and Derivatives	Aromatic amino acids and derivatives	Phenylalanine and Tyrosine Branches from Chorismate	Biosynthetic Aromatic amino acid aminotransferase alpha (EC 2.6.1.57)	0.045659	0.0474373	0.0813985	0.116064	0	0.998302	0.966951	0.936917	1.04566
Amino Acids and Derivatives	Lysine, threonine, methionine, and cysteine	Threonine and Homoserine Biosynthesis	Threonine synthase (EC 4.2.3.1)	0.610478	0.612373	0.64925	0.447354	0.715709	0.998825	0.976491	1.1127	0.938666
Amino Acids and Derivatives	Aromatic amino acids and derivatives	Common Pathway For Synthesis of Aromatic Compounds (DAHP synthase to chorismate)	2-amino-3,7-dideoxy-D-threo-hept-6-ulosonate synthase (EC 2.5.1.-) - #1	0	0.00107812	0	0	0	0.998923	1	1	1
Amino Acids and Derivatives	Aromatic amino acids and derivatives	Chorismate Synthesis	2-amino-3,7-dideoxy-D-threo-hept-6-ulosonate synthase (EC 2.5.1.-)	0	0.00107812	0	0	0	0.998923	1	1	1
Amino Acids and Derivatives	Lysine, threonine, methionine, and cysteine	Lysine degradation	5-aminovalerate aminotransferase (EC 2.6.1.48)	0	0.00107812	0	0	0	0.998923	1	1	1
Amino Acids and Derivatives	Branched-chain amino acids	Isoleucine degradation	Transcriptional regulator BkdR of isoleucine and valine catabolism operon - #1	0	0.00107812	0	0.00450735	0	0.998923	1	0.995513	1
Amino Acids and Derivatives	Branched-chain amino acids	Valine degradation	Transcriptional regulator BkdR of isoleucine and valine catabolism operon - #2	0	0.00107812	0	0.00450735	0	0.998923	1	0.995513	1
Amino Acids and Derivatives	Branched-chain amino acids	Branched chain amino acid degradation regulons	Transcriptional regulator BkdR of isoleucine and valine catabolism operon	0	0.00107812	0	0.00450735	0	0.998923	1	0.995513	1
Amino Acids and Derivatives	Histidine Metabolism	Histidine Biosynthesis	Histidinol-phosphatase [alternative form] (EC 3.1.3.15)	0.167416	0.168187	0.251948	0.0394393	0.0332186	0.99934	0.93248	1.12312	1.12988
Amino Acids and Derivatives	Aromatic amino acids and derivatives	Aromatic amino acid degradation	Predicted 2-keto-4-pentenoate hydratase/2-oxohepta-3-ene-1,7-dioic acid hydratase	0.0169107	0.0172499	0.0445754	0.0191562	0.0422782	0.999667	0.973516	0.997797	0.975662
Amino Acids and Derivatives	Lysine, threonine, methionine, and cysteine	Lysine degradation	Saccharopine dehydrogenase [NAD+, L-lysine-forming] (EC 1.5.1.7) - #1	0	0	0.00387612	0	0	1	0.996139	1	1
Amino Acids and Derivatives	Lysine, threonine, methionine, and cysteine	Lysine biosynthesis AAA pathway 2	Saccharopine dehydrogenase [NAD+, L-lysine-forming] (EC 1.5.1.7)	0	0	0.00387612	0	0	1	0.996139	1	1
Amino Acids and Derivatives	Lysine, threonine, methionine, and cysteine	Threonine degradation	threonine dehydrogenase	0	0	0.00387612	0	0	1	0.996139	1	1
Amino Acids and Derivatives	Lysine, threonine, methionine, and cysteine	Methionine Salvage	2-hydroxy-3-keto-5-methylthiopentenyl-1-phosphate phosphatase	0	0	0.00387612	0	0	1	0.996139	1	1
Amino Acids and Derivatives	Lysine, threonine, methionine, and cysteine	Methionine Salvage	2-hydroxy-3-keto-5-methylthiopentenyl-1-phosphate phosphatase related protein	0	0	0.00387612	0	0	1	0.996139	1	1
Amino Acids and Derivatives	Amino Acids and Derivatives	Phosphonoalanine utilization	Phosphonoalanine and/or phosphonopyruvate ABC transporter ATP-binding protein	0	0	0.00387612	0	0	1	0.996139	1	1
Amino Acids and Derivatives	Histidine Metabolism	Histidine Degradation	Glutamate formiminotransferase (EC 2.1.2.5)	0	0	0.00581418	0	0	1	0.994219	1	1
Amino Acids and Derivatives	Glutamine, glutamate, aspartate, asparagine; ammonia assimilation	Poly-gamma-glutamate biosynthesis	Poly-gamma-glutamate synthase subunit PgsA/CapA (EC 6.3.2.-)	0	0	0.00581418	0	0	1	0.994219	1	1
Amino Acids and Derivatives	Arginine; urea cycle, polyamines	Urea decomposition	Urea carboxylase-related amino acid permease	0	0	0.0135664	0	0	1	0.986615	1	1
Amino Acids and Derivatives	Aromatic amino acids and derivatives	Tryptophan catabolism	2-keto-4-pentenoate hydratase (EC 4.2.1.-)	0	0	0.0174425	0	0	1	0.982856	1	1
Amino Acids and Derivatives	Lysine, threonine, methionine, and cysteine	Lysine biosynthesis AAA pathway 2	Homocitrate synthase (EC 2.3.3.14)	0	0	0.0213187	0	0	1	0.979126	1	1
Amino Acids and Derivatives	Branched-chain amino acids	Branched chain amino acid degradation regulons	Methylglutaconyl-CoA hydratase (EC 4.2.1.18)	0	0	0.0251948	0	0	1	0.975424	1	1
Amino Acids and Derivatives	Branched-chain amino acids	Leucine Degradation and HMG-CoA Metabolism	Methylglutaconyl-CoA hydratase (EC 4.2.1.18) - #2	0	0	0.0251948	0	0	1	0.975424	1	1
Amino Acids and Derivatives	Branched-chain amino acids	HMG CoA Synthesis	Methylglutaconyl-CoA hydratase (EC 4.2.1.18) - #1	0	0	0.0251948	0	0	1	0.975424	1	1
Amino Acids and Derivatives	Lysine, threonine, methionine, and cysteine	Lysine fermentation	Acetate kinase (EC 2.7.2.1)	0	0	0.0426373	0	0	1	0.959106	1	1
Amino Acids and Derivatives	Lysine, threonine, methionine, and cysteine	Threonine anaerobic catabolism gene cluster	Acetate kinase (EC 2.7.2.1) - #1	0	0	0.0426373	0	0	1	0.959106	1	1
Amino Acids and Derivatives	Glutamine, glutamate, aspartate, asparagine; ammonia assimilation	Glutamine, Glutamate, Aspartate and Asparagine Biosynthesis	Asparagine synthetase [glutamine-hydrolyzing] (EC 6.3.5.4) - #2	0	0	0.143416	0	0	1	0.874572	1	1
Amino Acids and Derivatives	Glutamine, glutamate, aspartate, asparagine; ammonia assimilation	Glutamate and Aspartate uptake in Bacteria	Asparagine synthetase [glutamine-hydrolyzing] (EC 6.3.5.4) - #1	0	0	0.143416	0	0	1	0.874572	1	1
Amino Acids and Derivatives	Arginine; urea cycle, polyamines	Cyanophycin Metabolism	Asparagine synthetase [glutamine-hydrolyzing] (EC 6.3.5.4)	0	0	0.143416	0	0	1	0.874572	1	1
Amino Acids and Derivatives	Arginine; urea cycle, polyamines	Putrescine utilization pathways	Putrescine utilization regulator	0	0	0	0.00112684	0	1	1	0.998874	1
Amino Acids and Derivatives	Branched-chain amino acids	Isoleucine degradation	Predicted transcriptional regulator of leucine degradation pathway, MerR family	0	0	0	0.00225367	0	1	1	0.997751	1
Amino Acids and Derivatives	Arginine; urea cycle, polyamines	Arginine and Ornithine Degradation	Arginine permease RocE	0	0	0	0.00225367	0	1	1	0.997751	1
Amino Acids and Derivatives	Histidine Metabolism	Histidine Degradation	Conserved hypothetical protein (perhaps related to histidine degradation)	0	0	0	0.00225367	0	1	1	0.997751	1
Amino Acids and Derivatives	Lysine, threonine, methionine, and cysteine	Cysteine Biosynthesis	Sulfate permease, Trk-type	0	0	0	0.00225367	0	1	1	0.997751	1
Amino Acids and Derivatives	Branched-chain amino acids	Leucine Degradation and HMG-CoA Metabolism	Predicted transcriptional regulator of leucine degradation pathway, MerR family - #1	0	0	0	0.00225367	0	1	1	0.997751	1
Amino Acids and Derivatives	Branched-chain amino acids	Valine degradation	Predicted transcriptional regulator of leucine degradation pathway, MerR family - #2	0	0	0	0.00225367	0	1	1	0.997751	1
Amino Acids and Derivatives	Arginine; urea cycle, polyamines	Arginine and Ornithine Degradation	Succinylglutamate desuccinylase (EC 3.5.1.96)	0	0	0	0.00338051	0	1	1	0.996631	1
Amino Acids and Derivatives	Lysine, threonine, methionine, and cysteine	Lysine degradation	5-aminopentanamidase (EC 3.5.1.30)	0	0	0	0.00338051	0	1	1	0.996631	1
Amino Acids and Derivatives	Branched-chain amino acids	Leucine Degradation and HMG-CoA Metabolism	Biotin carboxyl carrier protein of methylcrotonyl-CoA carboxylase - #1	0	0	0	0.00338051	0	1	1	0.996631	1
Amino Acids and Derivatives	Branched-chain amino acids	HMG CoA Synthesis	Biotin carboxyl carrier protein of methylcrotonyl-CoA carboxylase	0	0	0	0.00338051	0	1	1	0.996631	1
Amino Acids and Derivatives	Lysine, threonine, methionine, and cysteine	Lysine fermentation	L-beta-lysine 5,6-aminomutase beta subunit (EC 5.4.3.3) - #1	0	0	0	0.00450735	0	1	1	0.995513	1
Amino Acids and Derivatives	Alanine, serine, and glycine	Glycine cleavage system	Lipoate-protein ligase A type 2	0	0	0	0.00450735	0	1	1	0.995513	1
Amino Acids and Derivatives	Lysine, threonine, methionine, and cysteine	Lysine degradation	L-beta-lysine 5,6-aminomutase beta subunit (EC 5.4.3.3)	0	0	0	0.00450735	0	1	1	0.995513	1
Amino Acids and Derivatives	Alanine, serine, and glycine	Glycine and Serine Utilization	L-serine dehydratase, beta subunit (EC 4.3.1.17)	0	0	0	0.00450735	0	1	1	0.995513	1
Amino Acids and Derivatives	Arginine; urea cycle, polyamines	Putrescine utilization pathways	Gamma-glutamyl-GABA hydrolase (EC 3.5.1.94)	0	0	0.00775224	0.00450735	0	1	0.992307	0.995513	1
Amino Acids and Derivatives	Amino Acids and Derivatives	L-2-amino-thiazoline-4-carboxylic acid-Lcysteine conversion	L-2-amino-thiazoline-4-carboxylic acid hydrolase (EC 3.5.2.-)	0	0	0	0.00676102	0	1	1	0.993284	1
Amino Acids and Derivatives	Lysine, threonine, methionine, and cysteine	Threonine and Homoserine Biosynthesis	Predicted functional analog of homoserine kinase (EC 2.7.1.-)	0	0	0.0096903	0.00676102	0	1	0.990403	0.993284	1
Amino Acids and Derivatives	Proline and 4-hydroxyproline	Proline, 4-hydroxyproline uptake and utilization	PutR, transcriptional activator of PutA and PutP	0	0	0	0.00788786	0	1	1	0.992174	1
Amino Acids and Derivatives	Lysine, threonine, methionine, and cysteine	Methionine Degradation	Methionine transporter MetT - #1	0	0	0	0.0101415	0	1	1	0.98996	1
Amino Acids and Derivatives	Lysine, threonine, methionine, and cysteine	Methionine Biosynthesis	Methionine transporter MetT	0	0	0	0.0101415	0	1	1	0.98996	1
Amino Acids and Derivatives	Arginine; urea cycle, polyamines	Polyamine Metabolism	Arginine/ornithine antiporter	0	0	0	0.013522	0	1	1	0.986658	1
Amino Acids and Derivatives	Proline and 4-hydroxyproline	Proline, 4-hydroxyproline uptake and utilization	Peptidyl prolyl 4-hydroxylase, alpha subunit (EC 1.14.11.2)	0	0	0.151169	0.0157757	0	1	0.868682	0.984469	1
Amino Acids and Derivatives	Proline and 4-hydroxyproline	Proline, 4-hydroxyproline uptake and utilization	Similar to eukaryotic Peptidyl prolyl 4-hydroxylase, alpha subunit (EC 1.14.11.2)	0	0	0.151169	0.0157757	0	1	0.868682	0.984469	1
Amino Acids and Derivatives	Proline and 4-hydroxyproline	Proline, 4-hydroxyproline uptake and utilization	NAD-specific glutamate dehydrogenase (EC 1.4.1.2), large	0	0	0	0.0191562	0	1	1	0.981204	1
Amino Acids and Derivatives	Glutamine, glutamate, aspartate, asparagine; ammonia assimilation	Glutamate dehydrogenases	NAD-specific glutamate dehydrogenase (EC 1.4.1.2), large form	0	0	0	0.0191562	0	1	1	0.981204	1
Amino Acids and Derivatives	Glutamine, glutamate, aspartate, asparagine; ammonia assimilation	Glutamine, Glutamate, Aspartate and Asparagine Biosynthesis	NAD-specific glutamate dehydrogenase (EC 1.4.1.2), large form - #1	0	0	0	0.0191562	0	1	1	0.981204	1
Amino Acids and Derivatives	Glutamine, glutamate, aspartate, asparagine; ammonia assimilation	Glutamine, Glutamate, Aspartate and Asparagine Biosynthesis	Aspartate--ammonia ligase (EC 6.3.1.1)	0	0	0	0.0214099	0	1	1	0.979039	1
Amino Acids and Derivatives	Proline and 4-hydroxyproline	Proline, 4-hydroxyproline uptake and utilization	Transcriptional repressor of PutA and PutP	0	0	0	0.0214099	0	1	1	0.979039	1
Amino Acids and Derivatives	Arginine; urea cycle, polyamines	Urea decomposition	Allophanate hydrolase (EC 3.5.1.54) - #1	0	0	0	0.0270441	0	1	1	0.973668	1
Amino Acids and Derivatives	Arginine; urea cycle, polyamines	Urea carboxylase and Allophanate hydrolase cluster	Allophanate hydrolase (EC 3.5.1.54)	0	0	0	0.0270441	0	1	1	0.973668	1
Amino Acids and Derivatives	Arginine; urea cycle, polyamines	Cyanophycin Metabolism	Cyanophycin synthetase-like	0	0	0.0193806	0.0270441	0	1	0.980988	0.973668	1
Amino Acids and Derivatives	Arginine; urea cycle, polyamines	Putrescine utilization pathways	Gamma-glutamyl-putrescine oxidase (EC1.4.3.-)	0	0	0	0.0281709	0	1	1	0.972601	1
Amino Acids and Derivatives	Branched-chain amino acids	Leucine Degradation and HMG-CoA Metabolism	Hydroxymethylglutaryl-CoA reductase (EC 1.1.1.34)	0	0	0	0.0349319	0	1	1	0.966247	1
Amino Acids and Derivatives	Aromatic amino acids and derivatives	Aromatic amino acid degradation	Putative 5-carboxymethyl-2-hydroxymuconate semialdehyde dehydrogenase oxidoreductase protein (EC 1.2.1.60)	0	0	0.0193806	0.0360588	0	1	0.980988	0.965196	1
Amino Acids and Derivatives	Aromatic amino acids and derivatives	Chorismate Synthesis	Arogenate dehydrogenase (EC 1.3.1.43)	0	0	0.096903	0.0371856	0	1	0.911658	0.964148	1
Amino Acids and Derivatives	Aromatic amino acids and derivatives	Phenylalanine and Tyrosine Branches from Chorismate	Arogenate dehydrogenase (EC 1.3.1.43) - #1	0	0	0.096903	0.0371856	0	1	0.911658	0.964148	1
Amino Acids and Derivatives	Arginine; urea cycle, polyamines	Urea decomposition	Urease accessory protein UreD	0	0	0.0251948	0.0664834	0	1	0.975424	0.937661	1
Amino Acids and Derivatives	Arginine; urea cycle, polyamines	Urease subunits	Urease accessory protein UreD - #1	0	0	0.0251948	0.0664834	0	1	0.975424	0.937661	1
Amino Acids and Derivatives	Aromatic amino acids and derivatives	Common Pathway For Synthesis of Aromatic Compounds (DAHP synthase to chorismate)	Shikimate 5-dehydrogenase I alpha (EC 1.1.1.25) - #1	0	0	0.156983	0.240016	0	1	0.864317	0.806441	1
Amino Acids and Derivatives	Aromatic amino acids and derivatives	Chorismate Synthesis	Shikimate 5-dehydrogenase I alpha (EC 1.1.1.25)	0	0	0.156983	0.240016	0	1	0.864317	0.806441	1
Amino Acids and Derivatives	Branched-chain amino acids	Ketoisovalerate oxidoreductase	Ketoisovalerate oxidoreductase subunit VorB (EC 1.2.7.7)	0	0	0	0	0.00603974	1	1	1	0.993997
Amino Acids and Derivatives	Glutamine, glutamate, aspartate, asparagine; ammonia assimilation	Glutamate and Aspartate uptake in Bacteria	Glutamate-aspartate carrier protein	0	0	0	0	0.00603974	1	1	1	0.993997
Amino Acids and Derivatives	Amino Acids and Derivatives	Creatine and Creatinine Degradation	Creatinase (EC 3.5.3.3)	0	0	0	0	0.00603974	1	1	1	0.993997
Amino Acids and Derivatives	Arginine; urea cycle, polyamines	Arginine and Ornithine Degradation	Arginine N-succinyltransferase (EC 2.3.1.109)	0	0	0	0.0191562	0.00603974	1	1	0.981204	0.993997
Amino Acids and Derivatives	Proline and 4-hydroxyproline	Proline, 4-hydroxyproline uptake and utilization	D-amino acid dehydrogenase (EC 1.4.99.1) family protein in hydroxy-L-proline catabolic cluster	0	0	0	0	0.00905961	1	1	1	0.991022
Amino Acids and Derivatives	Arginine; urea cycle, polyamines	Arginine and Ornithine Degradation	Arginine utilization regulatory protein RocR	0	0	0	0	0.00905961	1	1	1	0.991022
Amino Acids and Derivatives	Proline and 4-hydroxyproline	Proline, 4-hydroxyproline uptake and utilization	Proline racemase (EC 5.1.1.4)	0	0	0	0	0.00905961	1	1	1	0.991022
Amino Acids and Derivatives	Alanine, serine, and glycine	Glycine and Serine Utilization	L-serine dehydratase 1 (EC 4.3.1.17)	0	0	0	0	0.00905961	1	1	1	0.991022
Amino Acids and Derivatives	Lysine, threonine, methionine, and cysteine	Methionine Biosynthesis	Archaeal S-adenosylmethionine synthetase (EC 2.5.1.6)	0	0	0.00387612	0	0.00905961	1	0.996139	1	0.991022
Amino Acids and Derivatives	Branched-chain amino acids	Branched-Chain Amino Acid Biosynthesis	Valine--pyruvate aminotransferase (EC 2.6.1.66) - #1	0	0	0	0.013522	0.00905961	1	1	0.986658	0.991022
Amino Acids and Derivatives	Alanine, serine, and glycine	Alanine biosynthesis	Valine--pyruvate aminotransferase (EC 2.6.1.66)	0	0	0	0.013522	0.00905961	1	1	0.986658	0.991022
Amino Acids and Derivatives	Arginine; urea cycle, polyamines	Putrescine utilization pathways	Gamma-glutamyl-putrescine synthetase (EC 6.3.1.11)	0	0	0	0.0462003	0.00905961	1	1	0.95584	0.991022
Amino Acids and Derivatives	Aromatic amino acids and derivatives	Common Pathway For Synthesis of Aromatic Compounds (DAHP synthase to chorismate)	Quinate/shikimate 5-dehydrogenase I delta (EC 1.1.1.25) - #1	0	0	0	0	0.0120795	1	1	1	0.988065
Amino Acids and Derivatives	Arginine; urea cycle, polyamines	Urea decomposition	Partial urea carboxylase (EC 6.3.4.6) - #1	0	0	0	0	0.0120795	1	1	1	0.988065
Amino Acids and Derivatives	Aromatic amino acids and derivatives	Chorismate Synthesis	Quinate/shikimate 5-dehydrogenase I delta (EC 1.1.1.25)	0	0	0	0	0.0120795	1	1	1	0.988065
Amino Acids and Derivatives	Arginine; urea cycle, polyamines	Urea carboxylase and Allophanate hydrolase cluster	Partial urea carboxylase (EC 6.3.4.6)	0	0	0	0	0.0120795	1	1	1	0.988065
Amino Acids and Derivatives	Histidine Metabolism	Histidine Degradation	Histidine utilization repressor	0	0	0	0	0.0120795	1	1	1	0.988065
Amino Acids and Derivatives	Aromatic amino acids and derivatives	Phenylalanine and Tyrosine Branches from Chorismate	Arogenate dehydratase (EC 4.2.1.91)	0	0	0	0	0.0150994	1	1	1	0.985125
Amino Acids and Derivatives	Lysine, threonine, methionine, and cysteine	Methionine Degradation	2-Oxobutyrate oxidase, putative	0	0	0	0	0.0150994	1	1	1	0.985125
Amino Acids and Derivatives	Aromatic amino acids and derivatives	Aromatic amino acid degradation	Kynurenine formamidase, bacterial (EC 3.5.1.9)	0	0	0.0135664	0.0360588	0.0181192	1	0.986615	0.965196	0.982203
Amino Acids and Derivatives	Aromatic amino acids and derivatives	Tryptophan catabolism	Kynurenine formamidase, bacterial (EC 3.5.1.9) - #1	0	0	0.0135664	0.0360588	0.0181192	1	0.986615	0.965196	0.982203
Amino Acids and Derivatives	Arginine; urea cycle, polyamines	Urea decomposition	Urea carboxylase-related ABC transporter, periplasmic substrate-binding protein	0	0	0	0.00450735	0.0211391	1	1	0.995513	0.979299
Amino Acids and Derivatives	Histidine Metabolism	Histidine Degradation	N-formylglutamate deformylase (EC 3.5.1.68)	0	0	0	0.0259172	0.0211391	1	1	0.974737	0.979299
Amino Acids and Derivatives	Alanine, serine, and glycine	Alanine biosynthesis	Probable valine-pyruvate aminotransferase (EC 2.6.1.66)	0	0	0	0	0.0271788	1	1	1	0.97354
Amino Acids and Derivatives	Branched-chain amino acids	Branched chain amino acid degradation regulons	3-hydroxyacyl-CoA dehydrogenase [isoleucine degradation] (EC 1.1.1.35)	0	0	0	0.0225367	0.0271788	1	1	0.97796	0.97354
Amino Acids and Derivatives	Aromatic amino acids and derivatives	Tryptophan catabolism	4-hydroxy-2-oxovalerate aldolase (EC 4.1.3.-)	0	0	0.0213187	0.0259172	0.0271788	1	0.979126	0.974737	0.97354
Amino Acids and Derivatives	Arginine; urea cycle, polyamines	Arginine and Ornithine Degradation	Succinylarginine dihydrolase (EC 3.5.3.23)	0	0	0	0	0.0301987	1	1	1	0.970687
Amino Acids and Derivatives	Glutamine, glutamate, aspartate, asparagine; ammonia assimilation	Glutamine, Glutamate, Aspartate and Asparagine Biosynthesis	Leucine-responsive regulatory protein, regulator for leucine (or lrp) regulon and high-affinity branched-chain amino acid transport system - #1	0	0	0	0.00788786	0.0301987	1	1	0.992174	0.970687
Amino Acids and Derivatives	Branched-chain amino acids	Branched-Chain Amino Acid Biosynthesis	Leucine-responsive regulatory protein, regulator for leucine (or lrp) regulon and high-affinity branched-chain amino acid transport system	0	0	0	0.00788786	0.0301987	1	1	0.992174	0.970687
Amino Acids and Derivatives	Lysine, threonine, methionine, and cysteine	Lysine fermentation	Butyrate-acetoacetate CoA-transferase subunit B (EC 2.8.3.9)	0	0	0	0	0.0332186	1	1	1	0.967849
Amino Acids and Derivatives	Arginine; urea cycle, polyamines	Urea decomposition	Urease accessory protein UreF	0	0	0	0	0.0452981	1	1	1	0.956665
Amino Acids and Derivatives	Arginine; urea cycle, polyamines	Urease subunits	Urease accessory protein UreF - #1	0	0	0	0	0.0452981	1	1	1	0.956665
Amino Acids and Derivatives	Aromatic amino acids and derivatives	Aromatic amino acid degradation	Tryptophanase (EC 4.1.99.1)	0	0	0	0	0.069457	1	1	1	0.935054
Amino Acids and Derivatives	Arginine; urea cycle, polyamines	Urea decomposition	Urea carboxylase-related aminomethyltransferase (EC 2.1.2.10)	0	0	0	0	0.069457	1	1	1	0.935054
Amino Acids and Derivatives	Arginine; urea cycle, polyamines	Urea decomposition	Urea carboxylase (EC 6.3.4.6) - #1	0	0	0	0	0.0815365	1	1	1	0.92461
Amino Acids and Derivatives	Arginine; urea cycle, polyamines	Urea carboxylase and Allophanate hydrolase cluster	Urea carboxylase (EC 6.3.4.6)	0	0	0	0	0.0815365	1	1	1	0.92461
Amino Acids and Derivatives	Glutamine, glutamate, aspartate, asparagine; ammonia assimilation	Glutamine, Glutamate, Aspartate and Asparagine Biosynthesis	Asparagine synthetase [glutamine-hydrolyzing] (EC 6.3.5.4) AsnH	0	0	0	0	0.0875763	1	1	1	0.919476
Amino Acids and Derivatives	Branched-chain amino acids	Valine degradation	3-hydroxyisobutyryl-CoA hydrolase (EC 3.1.2.4) - #1	0	0	0	0	0.163073	1	1	1	0.859791
Amino Acids and Derivatives	Branched-chain amino acids	Branched chain amino acid degradation regulons	3-hydroxyisobutyryl-CoA hydrolase (EC 3.1.2.4)	0	0	0	0	0.163073	1	1	1	0.859791
Amino Acids and Derivatives	Lysine, threonine, methionine, and cysteine	Threonine anaerobic catabolism gene cluster	Phosphate acetyltransferase (EC 2.3.1.8)	0	0	0.0717082	0.0912738	0.187232	1	0.93309	0.91636	0.842295
Amino Acids and Derivatives	Proline and 4-hydroxyproline	A Hypothetical Protein Related to Proline Metabolism	Hypothetical protein YggS, proline synthase co-transcribed bacterial homolog PROSC	0	0	0.158921	0	0.199311	1	0.862872	1	0.833812
Amino Acids and Derivatives	Lysine, threonine, methionine, and cysteine	Threonine degradation	Threonine dehydrogenase and related Zn-dependent dehydrogenases	0	0	0.0290709	0	0.23857	1	0.97175	1	0.807383
Amino Acids and Derivatives	Alanine, serine, and glycine	Glycine cleavage system	Glycine cleavage system transcriptional activator GcvA	0.00338215	0.00323436	0.00387612	0	0.0362384	1.00015	0.999508	1.00338	0.968293
Amino Acids and Derivatives	Aromatic amino acids and derivatives	Aromatic amino acid interconversions with aryl acids	Indolepyruvate ferredoxin oxidoreductase, alpha and beta subunits like	0.0067643	0.00646872	0	0.041693	0.024159	1.00029	1.00676	0.966469	0.983016
Amino Acids and Derivatives	Arginine; urea cycle, polyamines	Urea decomposition	Urease gamma subunit (EC 3.5.1.5)	0.0169107	0.0161718	0.0581418	0.0450735	0.0301987	1.00073	0.961034	0.973052	0.987102
Amino Acids and Derivatives	Arginine; urea cycle, polyamines	Urease subunits	Urease gamma subunit (EC 3.5.1.5) - #1	0.0169107	0.0161718	0.0581418	0.0450735	0.0301987	1.00073	0.961034	0.973052	0.987102
Amino Acids and Derivatives	Lysine, threonine, methionine, and cysteine	Lysine degradation	Saccharopine dehydrogenase (EC 1.5.1.9)	0.00507322	0.00431248	0.00193806	0	0	1.00076	1.00313	1.00507	1.00507
Amino Acids and Derivatives	Branched-chain amino acids	Leucine Degradation and HMG-CoA Metabolism	Leucine dehydrogenase (EC 1.4.1.9) - #2	0.00845537	0.00754684	0	0.0326783	0	1.0009	1.00846	0.976544	1.00846
Amino Acids and Derivatives	Branched-chain amino acids	Branched chain amino acid degradation regulons	Leucine dehydrogenase (EC 1.4.1.9) - #1	0.00845537	0.00754684	0	0.0326783	0	1.0009	1.00846	0.976544	1.00846
Amino Acids and Derivatives	Branched-chain amino acids	Branched-Chain Amino Acid Biosynthesis	Leucine dehydrogenase (EC 1.4.1.9)	0.00845537	0.00754684	0	0.0326783	0	1.0009	1.00846	0.976544	1.00846
Amino Acids and Derivatives	Arginine; urea cycle, polyamines	Polyamine Metabolism	Spermidine Putrescine ABC transporter permease component PotB (TC 3.A.1.11.1)	0.152197	0.150937	0.0910888	0.055215	0.0392583	1.00109	1.05601	1.09191	1.10867
Amino Acids and Derivatives	Alanine, serine, and glycine	Alanine biosynthesis	Iron-sulfur cluster regulator IscR	0.0338215	0.0323436	0.0833366	0.0878933	0.0875763	1.00143	0.954294	0.950297	0.950574
Amino Acids and Derivatives	Lysine, threonine, methionine, and cysteine	Lysine degradation	L-lysine permease	0.00169107	0	0.00775224	0.00112684	0	1.00169	0.993985	1.00056	1.00169
Amino Acids and Derivatives	Arginine; urea cycle, polyamines	Polyamine Metabolism	DNA-binding response regulator, LuxR family, near polyamine transporter	0.00507322	0.00323436	0	0	0.0181192	1.00183	1.00507	1.00507	0.987186
Amino Acids and Derivatives	Aromatic amino acids and derivatives	Aromatic amino acid degradation	5-carboxymethyl-2-hydroxymuconate delta-isomerase (EC 5.3.3.10)	0.0591876	0.0571404	0.0387612	0.0191562	0.024159	1.00194	1.01966	1.03928	1.0342
Amino Acids and Derivatives	Alanine, serine, and glycine	Alanine biosynthesis	Cysteine desulfurase CsdA-CsdE (EC 2.8.1.7), main protein CsdA	0.0270572	0.0247968	0.00387612	0	0	1.00221	1.02309	1.02706	1.02706
Amino Acids and Derivatives	Branched-chain amino acids	Branched chain amino acid degradation regulons	Predicted transcriptional regulator LiuR of leucine degradation pathway, MerR family	0.0067643	0.00431248	0.0290709	0.00450735	0	1.00244	0.978324	1.00225	1.00676
Amino Acids and Derivatives	Branched-chain amino acids	HMG CoA Synthesis	Predicted transcriptional regulator LiuR of leucine degradation pathway, MerR family - #1	0.0067643	0.00431248	0.0290709	0.00450735	0	1.00244	0.978324	1.00225	1.00676
Amino Acids and Derivatives	Arginine; urea cycle, polyamines	Arginine Biosynthesis extended	Acetylornithine deacetylase (EC 3.5.1.16)	0.0710251	0.0679216	0	0.13522	0.172133	1.00291	1.07103	0.943451	0.913741
Amino Acids and Derivatives	Alanine, serine, and glycine	Alanine biosynthesis	Iron-sulfur cluster assembly scaffold protein IscU	0.128522	0.125062	0.406993	0.315514	0.154013	1.00308	0.802081	0.857856	0.97791
Amino Acids and Derivatives	Arginine; urea cycle, polyamines	Polyamine Metabolism	Putrescine ABC transporter putrescine-binding protein PotF (TC 3.A.1.11.2)	0.1894	0.185437	0.219001	0.107049	0.0301987	1.00334	0.975717	1.07439	1.15453
Amino Acids and Derivatives	Lysine, threonine, methionine, and cysteine	Lysine biosynthesis AAA pathway 2	Acetylaminoadipate kinase (EC 2.7.2.-)	0.00338215	0	0	0	0	1.00338	1.00338	1.00338	1.00338
Amino Acids and Derivatives	Amino Acids and Derivatives	Creatine and Creatinine Degradation	N-carbamoylsarcosine amidase (EC 3.5.1.59)	0.00338215	0	0	0	0	1.00338	1.00338	1.00338	1.00338
Amino Acids and Derivatives	Aromatic amino acids and derivatives	Tryptophan catabolism	Kynurenine formamidase (EC 3.5.1.9)	0.00338215	0	0	0	0	1.00338	1.00338	1.00338	1.00338
Amino Acids and Derivatives	Lysine, threonine, methionine, and cysteine	Lysine biosynthesis AAA pathway 2	Saccharopine dehydrogenase [NADP , L-glutamate-forming] (EC 1.5.1.10)	0.00338215	0	0.00581418	0.0169026	0	1.00338	0.997582	0.986704	1.00338
Amino Acids and Derivatives	Lysine, threonine, methionine, and cysteine	Lysine degradation	Saccharopine dehydrogenase [NADP , L-glutamate-forming] (EC 1.5.1.10) - #1	0.00338215	0	0.00581418	0.0169026	0	1.00338	0.997582	0.986704	1.00338
Amino Acids and Derivatives	Aromatic amino acids and derivatives	Aromatic amino acid interconversions with aryl acids	Amino acid-binding ACT	0.00338215	0	0	0	0.00905961	1.00338	1.00338	1.00338	0.994374
Amino Acids and Derivatives	Arginine; urea cycle, polyamines	Urea decomposition	HupE-UreJ family metal transporter	0.00338215	0	0	0.013522	0.00905961	1.00338	1.00338	0.989995	0.994374
Amino Acids and Derivatives	Glutamine, glutamate, aspartate, asparagine; ammonia assimilation	Aspartate aminotransferase	Uncharacterized PLP-dependent aminotransferase YfdZ	0.00507322	0.00107812	0	0.00112684	0.0120795	1.00399	1.00507	1.00394	0.993077
Amino Acids and Derivatives	Lysine, threonine, methionine, and cysteine	Methionine Biosynthesis	Homoserine O-acetyltransferase (EC 2.3.1.31)	0.380492	0.374108	0.298461	0.411295	0.504318	1.00465	1.06318	0.978173	0.917686
Amino Acids and Derivatives	Amino Acids and Derivatives	Creatine and Creatinine Degradation	Sarcosine dehydrogenase, mitochondrial precursor (EC 1.5.99.1)	0.00507322	0	0	0	0	1.00507	1.00507	1.00507	1.00507
Amino Acids and Derivatives	Lysine, threonine, methionine, and cysteine	Lysine degradation	Lysine ketoglutarate reductase (EC 1.5.1.8) (LOR) (LKR)	0.00507322	0	0.00193806	0	0	1.00507	1.00313	1.00507	1.00507
Amino Acids and Derivatives	Lysine, threonine, methionine, and cysteine	Cysteine Biosynthesis	Cys regulon transcriptional activator CysB	0.00507322	0	0.0116284	0.048454	0.024159	1.00507	0.99352	0.958624	0.981364
Amino Acids and Derivatives	Arginine; urea cycle, polyamines	Urea decomposition	Urea ABC transporter, ATPase protein UrtD	0.0574965	0.0517498	0.0406993	0.0585955	0.120795	1.00546	1.01614	0.998962	0.943524
Amino Acids and Derivatives	Aromatic amino acids and derivatives	Aromatic amino acid interconversions with aryl acids	Phenylacetate-coenzyme A ligase (EC 6.2.1.30)	0.0338215	0.0280311	0.0465134	0.127333	0.214411	1.00563	0.987872	0.917051	0.851295
Amino Acids and Derivatives	Glutamine, glutamate, aspartate, asparagine; ammonia assimilation	Glutamate and Aspartate uptake in Bacteria	Glutamate Aspartate transport system permease protein GltK (TC 3.A.1.3.4)	0.0253661	0.0194062	0.0213187	0.0394393	0.00603974	1.00585	1.00396	0.986461	1.01921
Amino Acids and Derivatives	Lysine, threonine, methionine, and cysteine	Lysine fermentation	Electron transfer flavoprotein, alpha subunit - #1	0.224913	0.21778	0.122098	0.235509	0.23253	1.00586	1.09163	0.991424	0.99382
Amino Acids and Derivatives	Branched-chain amino acids	Branched chain amino acid degradation regulons	Electron transfer flavoprotein, alpha subunit	0.224913	0.21778	0.122098	0.235509	0.23253	1.00586	1.09163	0.991424	0.99382
Amino Acids and Derivatives	Arginine; urea cycle, polyamines	Urea decomposition	Urea ABC transporter, urea binding protein	0.0473501	0.0409686	0.0503895	0.0732444	0.0845564	1.00613	0.997106	0.975873	0.965694
Amino Acids and Derivatives	Lysine, threonine, methionine, and cysteine	Cysteine Biosynthesis	Adenylylsulfate kinase (EC 2.7.1.25)	0.123448	0.116437	0.162797	0.233255	0.211391	1.00628	0.96616	0.910962	0.927404
Amino Acids and Derivatives	Alanine, serine, and glycine	Serine Biosynthesis	Serine hydroxymethyltransferase 1 (EC 2.1.2.1)	0.0067643	0	0	0.00450735	0.024159	1.00676	1.00676	1.00225	0.983016
Amino Acids and Derivatives	Glutamine, glutamate, aspartate, asparagine; ammonia assimilation	Glutamine, Glutamate, Aspartate and Asparagine Biosynthesis	Glutaminase (EC 3.5.1.2)	0.0067643	0	0.0348851	0.0371856	0.111735	1.00676	0.972827	0.970669	0.905579
Amino Acids and Derivatives	Lysine, threonine, methionine, and cysteine	Cysteine Biosynthesis	Sulfite reductase [NADPH] hemoprotein beta-component (EC 1.8.1.2)	0.0980823	0.0905621	0.166673	0.185928	0.344265	1.0069	0.941208	0.925927	0.816864
Amino Acids and Derivatives	Arginine; urea cycle, polyamines	Urea decomposition	Urea carboxylase-related ABC transporter, ATPase protein	0.0152197	0.00754684	0.00581418	0.0123952	0.0362384	1.00762	1.00935	1.00279	0.979716
Amino Acids and Derivatives	Glutamine, glutamate, aspartate, asparagine; ammonia assimilation	Glutamate and Aspartate uptake in Bacteria	Glutamate Aspartate transport system permease protein GltJ (TC 3.A.1.3.4)	0.0253661	0.0172499	0.0542657	0.0191562	0.069457	1.00798	0.972588	1.00609	0.958773
Amino Acids and Derivatives	Branched-chain amino acids	Leucine Degradation and HMG-CoA Metabolism	Succinyl-CoA:3-ketoacid-coenzyme A transferase subunit A (EC 2.8.3.5) - #1	0.0558055	0.0474373	0.0755843	0.0811322	0.117775	1.00799	0.981611	0.976574	0.94456
Amino Acids and Derivatives	Branched-chain amino acids	Branched chain amino acid degradation regulons	Succinyl-CoA:3-ketoacid-coenzyme A transferase subunit A (EC 2.8.3.5)	0.0558055	0.0474373	0.0755843	0.0811322	0.117775	1.00799	0.981611	0.976574	0.94456
Amino Acids and Derivatives	Histidine Metabolism	Histidine Degradation	Formiminoglutamic iminohydrolase (EC 3.5.3.13)	0.0541144	0.0452811	0	0	0	1.00845	1.05411	1.05411	1.05411
Amino Acids and Derivatives	Aromatic amino acids and derivatives	Aromatic amino acid degradation	Putative 2,4-dihydroxyhept-2-ene-1,7-dioic acid aldolase	0.00845537	0	0	0.00338051	0	1.00846	1.00846	1.00506	1.00846
Amino Acids and Derivatives	Lysine, threonine, methionine, and cysteine	Methionine Salvage	1,2-dihydroxy-3-keto-5-methylthiopentene dioxygenase (EC 1.13.11.54)	0.00845537	0	0.00581418	0	0.0452981	1.00846	1.00263	1.00846	0.964754
Amino Acids and Derivatives	Lysine, threonine, methionine, and cysteine	Threonine degradation	low-specificity D-threonine aldolase	0.0338215	0.0247968	0.0096903	0.0191562	0.0966359	1.00881	1.0239	1.01439	0.942721
Amino Acids and Derivatives	Branched-chain amino acids	Branched chain amino acid degradation regulons	Succinyl-CoA:3-ketoacid-coenzyme A transferase subunit B (EC 2.8.3.5)	0.0287483	0.0194062	0.0736463	0.180294	0.184212	1.00916	0.958182	0.871603	0.86872
Amino Acids and Derivatives	Branched-chain amino acids	Leucine Degradation and HMG-CoA Metabolism	Succinyl-CoA:3-ketoacid-coenzyme A transferase subunit B (EC 2.8.3.5) - #1	0.0287483	0.0194062	0.0736463	0.180294	0.184212	1.00916	0.958182	0.871603	0.86872
Amino Acids and Derivatives	Lysine, threonine, methionine, and cysteine	Lysine degradation	Delta 1-piperideine-2-carboxylate reductase (EC 1.5.1.21)	0.0101464	0	0	0	0	1.01015	1.01015	1.01015	1.01015
Amino Acids and Derivatives	Lysine, threonine, methionine, and cysteine	Methionine Salvage	2,3-diketo-5-methylthiopentyl-1-phosphate enolase	0.0101464	0	0	0	0.0120795	1.01015	1.01015	1.01015	0.99809
Amino Acids and Derivatives	Lysine, threonine, methionine, and cysteine	Methionine Salvage	2,3-diketo-5-methylthiopentyl-1-phosphate enolase-phosphatase (EC 3.1.3.77)	0.0101464	0	0	0	0.0120795	1.01015	1.01015	1.01015	0.99809
Amino Acids and Derivatives	Arginine; urea cycle, polyamines	Urea decomposition	Urease beta subunit (EC 3.5.1.5)	0.0101464	0	0.0251948	0.0259172	0.024159	1.01015	0.985321	0.984628	0.986318
Amino Acids and Derivatives	Arginine; urea cycle, polyamines	Urease subunits	Urease beta subunit (EC 3.5.1.5) - #1	0.0101464	0	0.0251948	0.0259172	0.024159	1.01015	0.985321	0.984628	0.986318
Amino Acids and Derivatives	Lysine, threonine, methionine, and cysteine	Methionine Salvage	Methylthioribose-1-phosphate isomerase (EC 5.3.1.23)	0.0507322	0.0398905	0.106593	0.0766249	0.147974	1.01043	0.94952	0.97595	0.915293
Amino Acids and Derivatives	Lysine, threonine, methionine, and cysteine	Threonine degradation	L-allo-threonine aldolase	0.0338215	0.0226405	0.0213187	0.0698639	0.024159	1.01093	1.01224	0.966311	1.00943
Amino Acids and Derivatives	Lysine, threonine, methionine, and cysteine	Threonine degradation	L-allo-threonine aldolase (EC 2.1.2.1)	0.0338215	0.0226405	0.0213187	0.0698639	0.024159	1.01093	1.01224	0.966311	1.00943
Amino Acids and Derivatives	Alanine, serine, and glycine	Serine Biosynthesis	D-3-phosphoglycerate dehydrogenase (EC 1.1.1.95) - #1	0.727162	0.708325	0.84887	0.59497	0.655312	1.01103	0.934172	1.08288	1.04341
Amino Acids and Derivatives	Alanine, serine, and glycine	Glycine and Serine Utilization	D-3-phosphoglycerate dehydrogenase (EC 1.1.1.95)	0.727162	0.708325	0.84887	0.59497	0.655312	1.01103	0.934172	1.08288	1.04341
Amino Acids and Derivatives	Aromatic amino acids and derivatives	Aromatic amino acid degradation	2-oxo-hepta-3-ene-1,7-dioic acid hydratase (EC 4.2.-.-)	0.0372036	0.0258749	0.0368231	0	0.0120795	1.01104	1.00037	1.0372	1.02482
Amino Acids and Derivatives	Arginine; urea cycle, polyamines	Arginine and Ornithine Degradation	Agmatinase (EC 3.5.3.11)	0.120066	0.107812	0.118222	0.0946543	0.247629	1.01106	1.00165	1.02321	0.897756
Amino Acids and Derivatives	Arginine; urea cycle, polyamines	Polyamine Metabolism	Agmatinase (EC 3.5.3.11) - #1	0.120066	0.107812	0.118222	0.0946543	0.247629	1.01106	1.00165	1.02321	0.897756
Amino Acids and Derivatives	Lysine, threonine, methionine, and cysteine	Methionine Salvage	Methionine aminotransferase, PLP-dependent	0.0118375	0	0	0.0326783	0	1.01184	1.01184	0.979819	1.01184
Amino Acids and Derivatives	Branched-chain amino acids	Leucine Degradation and HMG-CoA Metabolism	Acetoacetyl-CoA synthetase [leucine] (EC 6.2.1.16) - #1	0.0152197	0.00323436	0.0213187	0	0	1.01195	0.994028	1.01522	1.01522
Amino Acids and Derivatives	Branched-chain amino acids	HMG CoA Synthesis	Acetoacetyl-CoA synthetase [leucine] (EC 6.2.1.16)	0.0152197	0.00323436	0.0213187	0	0	1.01195	0.994028	1.01522	1.01522
Amino Acids and Derivatives	Arginine; urea cycle, polyamines	Urea decomposition	Urease accessory protein UreG	0.0152197	0.00323436	0.0794604	0.0529613	0	1.01195	0.940488	0.964157	1.01522
Amino Acids and Derivatives	Arginine; urea cycle, polyamines	Urease subunits	Urease accessory protein UreG - #1	0.0152197	0.00323436	0.0794604	0.0529613	0	1.01195	0.940488	0.964157	1.01522
Amino Acids and Derivatives	Lysine, threonine, methionine, and cysteine	Cysteine Biosynthesis	Sulfate transport system permease protein CysT	0.0338215	0.0215624	0.127912	0.219733	0.211391	1.012	0.91658	0.84758	0.853417
Amino Acids and Derivatives	Branched-chain amino acids	Branched chain amino acid degradation regulons	Methylcrotonyl-CoA carboxylase carboxyl transferase subunit (EC 6.4.1.4)	0.0947002	0.080859	0.0930269	0.188182	0.277828	1.01281	1.00153	0.921324	0.856688
Amino Acids and Derivatives	Branched-chain amino acids	HMG CoA Synthesis	Methylcrotonyl-CoA carboxylase carboxyl transferase subunit (EC 6.4.1.4) - #1	0.0947002	0.080859	0.0930269	0.188182	0.277828	1.01281	1.00153	0.921324	0.856688
Amino Acids and Derivatives	Branched-chain amino acids	Leucine Degradation and HMG-CoA Metabolism	Methylcrotonyl-CoA carboxylase carboxyl transferase subunit (EC 6.4.1.4) - #2	0.0947002	0.080859	0.0930269	0.188182	0.277828	1.01281	1.00153	0.921324	0.856688
Amino Acids and Derivatives	Arginine; urea cycle, polyamines	Cyanophycin Metabolism	Cyanophycin synthase II	0.0625698	0.0474373	0.0387612	0.0676102	0.114755	1.01445	1.02292	0.995279	0.953187
Amino Acids and Derivatives	Aromatic amino acids and derivatives	Chorismate Synthesis	3-dehydroquinate synthase (EC 4.2.3.4)	0.400785	0.380577	0.350789	0.317768	0.314067	1.01464	1.03701	1.063	1.06599
Amino Acids and Derivatives	Aromatic amino acids and derivatives	Common Pathway For Synthesis of Aromatic Compounds (DAHP synthase to chorismate)	3-dehydroquinate synthase (EC 4.2.3.4) - #1	0.400785	0.380577	0.350789	0.317768	0.314067	1.01464	1.03701	1.063	1.06599
Amino Acids and Derivatives	Amino Acids and Derivatives	L-2-amino-thiazoline-4-carboxylic acid-Lcysteine conversion	Beta-ureidopropionase (EC 3.5.1.6)	0.0490412	0.0334217	0	0.0247904	0.0362384	1.01511	1.04904	1.02366	1.01235
Amino Acids and Derivatives	Aromatic amino acids and derivatives	Aromatic amino acid degradation	2,4-dihydroxyhept-2-ene-1,7-dioic acid aldolase (EC 4.1.2.-)	0.0152197	0	0	0.0315514	0.093616	1.01522	1.01522	0.984168	0.928315
Amino Acids and Derivatives	Glutamine, glutamate, aspartate, asparagine; ammonia assimilation	Glutamine, Glutamate, Aspartate and Asparagine Biosynthesis	Aspartate ammonia-lyase (EC 4.3.1.1)	0.0152197	0	0.0155045	0.0360588	0.114755	1.01522	0.99972	0.979886	0.910711
Amino Acids and Derivatives	Lysine, threonine, methionine, and cysteine	Cysteine Biosynthesis	Sulfate and thiosulfate binding protein CysP	0.045659	0.0291093	0.116284	0.0833859	0	1.01608	0.936732	0.965177	1.04566
Amino Acids and Derivatives	Amino Acids and Derivatives	Creatine and Creatinine Degradation	Cytosine deaminase (EC 3.5.4.1)	0.0169107	0	0.0406993	0.0540882	0	1.01691	0.977142	0.96473	1.01691
Amino Acids and Derivatives	Aromatic amino acids and derivatives	Common Pathway For Synthesis of Aromatic Compounds (DAHP synthase to chorismate)	Chorismate synthase (EC 4.2.3.5) - #1	0.740691	0.709403	0.620179	0.403408	0.504318	1.0183	1.07438	1.24033	1.15713
Amino Acids and Derivatives	Aromatic amino acids and derivatives	Chorismate Synthesis	Chorismate synthase (EC 4.2.3.5)	0.740691	0.709403	0.620179	0.403408	0.504318	1.0183	1.07438	1.24033	1.15713
Amino Acids and Derivatives	Branched-chain amino acids	Isoleucine degradation	3-ketoacyl-CoA thiolase [isoleucine degradation] (EC 2.3.1.16) - #1	0.021984	0.00323436	0.0096903	0	0	1.01869	1.01218	1.02198	1.02198
Amino Acids and Derivatives	Branched-chain amino acids	Branched chain amino acid degradation regulons	3-ketoacyl-CoA thiolase [isoleucine degradation] (EC 2.3.1.16)	0.021984	0.00323436	0.0096903	0	0	1.01869	1.01218	1.02198	1.02198
Amino Acids and Derivatives	Proline and 4-hydroxyproline	Proline, 4-hydroxyproline uptake and utilization	1-pyrroline-4-hydroxy-2-carboxylate deaminase (EC 3.5.4.22)	0.116684	0.0959527	0.065894	0.0597223	0	1.01892	1.04765	1.05375	1.11668
Amino Acids and Derivatives	Aromatic amino acids and derivatives	Aromatic amino acid interconversions with aryl acids	Indolepyruvate ferredoxin oxidoreductase, alpha and beta subunits	0.123448	0.102421	0.174425	0.421437	0.217431	1.01907	0.956594	0.790361	0.922803
Amino Acids and Derivatives	Branched-chain amino acids	Valine degradation	3-hydroxyacyl-CoA dehydrogenase (EC 1.1.1.35) - #1	0.673048	0.641482	0.645374	0.720049	0.827445	1.01923	1.01682	0.972675	0.915512
Amino Acids and Derivatives	Branched-chain amino acids	Isoleucine degradation	3-hydroxyacyl-CoA dehydrogenase (EC 1.1.1.35)	0.673048	0.641482	0.645374	0.720049	0.827445	1.01923	1.01682	0.972675	0.915512
Amino Acids and Derivatives	Amino Acids and Derivatives	Creatine and Creatinine Degradation	Creatinine amidohydrolase (EC 3.5.2.10)	0.0558055	0.035578	0.0387612	0	0	1.01953	1.01641	1.05581	1.05581
Amino Acids and Derivatives	Branched-chain amino acids	Branched-Chain Amino Acid Biosynthesis	Acetolactate synthase small subunit (EC 2.2.1.6)	0.165725	0.14339	0.31978	0.148742	0.111735	1.01953	0.883273	1.01478	1.04856
Amino Acids and Derivatives	Glutamine, glutamate, aspartate, asparagine; ammonia assimilation	Glutamate and Aspartate uptake in Bacteria	Glutamate Aspartate periplasmic binding protein precursor GltI (TC 3.A.1.3.4)	0.0355126	0.0150937	0.0155045	0.0281709	0.024159	1.02012	1.0197	1.00714	1.01109
Amino Acids and Derivatives	Branched-chain amino acids	Valine degradation	Enoyl-CoA hydratase [valine degradation] (EC 4.2.1.17) - #1	0.0862448	0.0646872	0.0484515	0.0585955	0.0301987	1.02025	1.03605	1.02612	1.0544
Amino Acids and Derivatives	Branched-chain amino acids	Branched chain amino acid degradation regulons	Enoyl-CoA hydratase [valine degradation] (EC 4.2.1.17)	0.0862448	0.0646872	0.0484515	0.0585955	0.0301987	1.02025	1.03605	1.02612	1.0544
Amino Acids and Derivatives	Lysine, threonine, methionine, and cysteine	Methionine Degradation	Pyruvate-flavodoxin oxidoreductase (EC 1.2.7.-)	0.0202929	0	0.253886	0.147616	0.24159	1.02029	0.813705	0.889055	0.821763
Amino Acids and Derivatives	Alanine, serine, and glycine	Alanine biosynthesis	Cysteine desulfurase (EC 2.8.1.7), IscS subfamily	0.147123	0.122906	0.0833366	0.145362	0.105695	1.02157	1.05888	1.00154	1.03747
Amino Acids and Derivatives	Lysine, threonine, methionine, and cysteine	Lysine biosynthesis AAA pathway 2	Homoisocitrate dehydrogenase (EC 1.1.1.87)	0.067643	0.0442029	0	0.00676102	0	1.02245	1.06764	1.06047	1.06764
Amino Acids and Derivatives	Arginine; urea cycle, polyamines	Polyamine Metabolism	Spermidine synthase (EC 2.5.1.16)	0.023675	0	0	0.0394393	0	1.02368	1.02368	0.984834	1.02368
Amino Acids and Derivatives	Arginine; urea cycle, polyamines	Urease subunits	Urease accessory protein UreE - #1	0.0304393	0.0053906	0.0484515	0.0428198	0.0211391	1.02491	0.98282	0.988128	1.00911
Amino Acids and Derivatives	Arginine; urea cycle, polyamines	Urea decomposition	Urease accessory protein UreE	0.0304393	0.0053906	0.0484515	0.0428198	0.0211391	1.02491	0.98282	0.988128	1.00911
Amino Acids and Derivatives	Lysine, threonine, methionine, and cysteine	Cysteine Biosynthesis	Serine acetyltransferase (EC 2.3.1.30)	0.138668	0.109968	0.12016	0.172406	0.23857	1.02586	1.01652	0.971223	0.919341
Amino Acids and Derivatives	Lysine, threonine, methionine, and cysteine	Methionine Biosynthesis	Serine acetyltransferase (EC 2.3.1.30) - #1	0.138668	0.109968	0.12016	0.172406	0.23857	1.02586	1.01652	0.971223	0.919341
Amino Acids and Derivatives	Branched-chain amino acids	HMG CoA Synthesis	Hydroxymethylglutaryl-CoA lyase (EC 4.1.3.4) - #1	0.0879359	0.0603748	0.0620179	0.175787	0.23555	1.02599	1.0244	0.925283	0.880528
Amino Acids and Derivatives	Branched-chain amino acids	Leucine Degradation and HMG-CoA Metabolism	Hydroxymethylglutaryl-CoA lyase (EC 4.1.3.4) - #2	0.0879359	0.0603748	0.0620179	0.175787	0.23555	1.02599	1.0244	0.925283	0.880528
Amino Acids and Derivatives	Branched-chain amino acids	Branched chain amino acid degradation regulons	Hydroxymethylglutaryl-CoA lyase (EC 4.1.3.4)	0.0879359	0.0603748	0.0620179	0.175787	0.23555	1.02599	1.0244	0.925283	0.880528
Amino Acids and Derivatives	Alanine, serine, and glycine	Glycine and Serine Utilization	Cystathionine gamma-lyase (EC 4.4.1.1)	0.108229	0.0797809	0.0620179	0.163391	0.166093	1.02635	1.04351	0.952585	0.950378
Amino Acids and Derivatives	Lysine, threonine, methionine, and cysteine	Cysteine Biosynthesis	Cystathionine gamma-lyase (EC 4.4.1.1) - #1	0.108229	0.0797809	0.0620179	0.163391	0.166093	1.02635	1.04351	0.952585	0.950378
Amino Acids and Derivatives	Lysine, threonine, methionine, and cysteine	Methionine Biosynthesis	Cystathionine gamma-lyase (EC 4.4.1.1) - #2	0.108229	0.0797809	0.0620179	0.163391	0.166093	1.02635	1.04351	0.952585	0.950378
Amino Acids and Derivatives	Lysine, threonine, methionine, and cysteine	Methionine Degradation	Cystathionine gamma-lyase (EC 4.4.1.1) - #3	0.108229	0.0797809	0.0620179	0.163391	0.166093	1.02635	1.04351	0.952585	0.950378
Amino Acids and Derivatives	Branched-chain amino acids	Branched chain amino acid degradation regulons	Electron transfer flavoprotein-ubiquinone oxidoreductase (EC 1.5.5.1)	0.126831	0.0970309	0.116284	0.183674	0.558676	1.02716	1.00945	0.951977	0.722941
Amino Acids and Derivatives	Aromatic amino acids and derivatives	Aromatic amino acid degradation	5-carboxymethyl-2-oxo-hex-3- ene-1,7-dioate decarboxylase (EC 4.1.1.68)	0.0879359	0.0582185	0.0755843	0.0664834	0.0603974	1.02808	1.01148	1.02012	1.02597
Amino Acids and Derivatives	Arginine; urea cycle, polyamines	Urea decomposition	Urea ABC transporter, ATPase protein UrtE	0.0287483	0	0.0426373	0.0338051	0	1.02875	0.986679	0.995109	1.02875
Amino Acids and Derivatives	Lysine, threonine, methionine, and cysteine	Lysine Biosynthesis DAP Pathway	Aspartokinase (EC 2.7.2.4)	0.624006	0.577873	0.503895	0.651312	0.634173	1.02924	1.07987	0.983465	0.993779
Amino Acids and Derivatives	Lysine, threonine, methionine, and cysteine	Threonine and Homoserine Biosynthesis	Aspartokinase (EC 2.7.2.4) - #1	0.624006	0.577873	0.503895	0.651312	0.634173	1.02924	1.07987	0.983465	0.993779
Amino Acids and Derivatives	Lysine, threonine, methionine, and cysteine	Lysine Biosynthesis DAP Pathway	Diaminopimelate epimerase (EC 5.1.1.7)	0.184327	0.149859	0.242257	0.189309	0.220451	1.02998	0.953367	0.995811	0.970402
Amino Acids and Derivatives	Lysine, threonine, methionine, and cysteine	Methionine Salvage	5'-methylthioadenosine phosphorylase (EC 2.4.2.28)	0.0304393	0	0.0930269	0.0709907	0.102676	1.03044	0.942739	0.962137	0.93449
Amino Acids and Derivatives	Aromatic amino acids and derivatives	Aromatic amino acid degradation	2-hydroxyhepta-2,4-diene-1,7-dioate isomerase (EC 5.3.3.-)	0.091318	0.0582185	0.0755843	0.0664834	0.0603974	1.03128	1.01463	1.02329	1.02916
Amino Acids and Derivatives	Branched-chain amino acids	Branched chain amino acid degradation regulons	Enoyl-CoA hydratase [isoleucine degradation] (EC 4.2.1.17)	0.108229	0.0743903	0	0.237763	0.253669	1.0315	1.10823	0.895348	0.883988
Amino Acids and Derivatives	Branched-chain amino acids	Isoleucine degradation	Enoyl-CoA hydratase [isoleucine degradation] (EC 4.2.1.17) - #1	0.108229	0.0743903	0	0.237763	0.253669	1.0315	1.10823	0.895348	0.883988
Amino Acids and Derivatives	Histidine Metabolism	Histidine Degradation	Formiminoglutamase (EC 3.5.3.8)	0.0321304	0	0	0	0	1.03213	1.03213	1.03213	1.03213
Amino Acids and Derivatives	Lysine, threonine, methionine, and cysteine	Methionine Biosynthesis	Homoserine dehydrogenase (EC 1.1.1.3)	0.569892	0.520732	0.558161	0.471018	0.359365	1.03233	1.00753	1.06721	1.15487
Amino Acids and Derivatives	Lysine, threonine, methionine, and cysteine	Threonine and Homoserine Biosynthesis	Homoserine dehydrogenase (EC 1.1.1.3) - #1	0.569892	0.520732	0.558161	0.471018	0.359365	1.03233	1.00753	1.06721	1.15487
Amino Acids and Derivatives	Lysine, threonine, methionine, and cysteine	Cysteine Biosynthesis	Sulfate transport system permease protein CysW	0.0490412	0.0161718	0.100779	0.113811	0.0815365	1.03235	0.952999	0.941849	0.969954
Amino Acids and Derivatives	Aromatic amino acids and derivatives	Tryptophan synthesis	Indole-3-glycerol phosphate synthase (EC 4.1.1.48) - #1	0.235059	0.19514	0.244196	0.188182	0.268768	1.0334	0.992657	1.03945	0.973432
Amino Acids and Derivatives	Aromatic amino acids and derivatives	Chorismate: Intermediate for synthesis of Tryptophan, PAPA antibiotics, PABA, 3-hydroxyanthranilate and more.	Indole-3-glycerol phosphate synthase (EC 4.1.1.48)	0.235059	0.19514	0.244196	0.188182	0.268768	1.0334	0.992657	1.03945	0.973432
Amino Acids and Derivatives	Lysine, threonine, methionine, and cysteine	Threonine degradation	Low-specificity L-threonine aldolase (EC 4.1.2.5) - #1	0.270572	0.227483	0.116284	0.107049	0	1.0351	1.13822	1.14771	1.27057
Amino Acids and Derivatives	Alanine, serine, and glycine	Glycine Biosynthesis	Low-specificity L-threonine aldolase (EC 4.1.2.5)	0.270572	0.227483	0.116284	0.107049	0	1.0351	1.13822	1.14771	1.27057
Amino Acids and Derivatives	Lysine, threonine, methionine, and cysteine	Methionine Degradation	Pyruvate dehydrogenase E1 component (EC 1.2.4.1)	1.42558	1.3401	1.12601	0.895835	1.11433	1.03652	1.1409	1.27942	1.14721
Amino Acids and Derivatives	Lysine, threonine, methionine, and cysteine	Lysine fermentation	Acetyl-CoA acetyltransferase (EC 2.3.1.9)	0.789732	0.725575	0.484515	0.958938	1.0479	1.03718	1.2056	0.913623	0.873937
Amino Acids and Derivatives	Glutamine, glutamate, aspartate, asparagine; ammonia assimilation	Glutamine, Glutamate, Aspartate and Asparagine Biosynthesis	Glutamine synthetase family protein in hypothetical Actinobacterial gene cluster	0.23675	0.191905	0.137602	0.0766249	0.0664372	1.03762	1.08716	1.14873	1.1597
Amino Acids and Derivatives	Aromatic amino acids and derivatives	Aromatic amino acid degradation	Indoleacetamide hydrolase (EC 3.5.1.-)	0.0659519	0.026953	0	0.0507077	0	1.03798	1.06595	1.01451	1.06595
Amino Acids and Derivatives	Glutamine, glutamate, aspartate, asparagine; ammonia assimilation	Glutamine, Glutamate, Aspartate and Asparagine Biosynthesis	L-asparaginase (EC 3.5.1.1)	0.0388947	0	0.063956	0.0597223	0.208371	1.03889	0.976445	0.980346	0.859748
Amino Acids and Derivatives	Branched-chain amino acids	Isoleucine degradation	3-ketoacyl-CoA thiolase (EC 2.3.1.16)	0.99097	0.916403	0.620179	0.85865	0.845564	1.03891	1.22886	1.07119	1.07879
Amino Acids and Derivatives	Lysine, threonine, methionine, and cysteine	Lysine degradation	Lysine decarboxylase (EC 4.1.1.18)	0.218149	0.171421	0.317842	0.299739	0.0573775	1.03989	0.924351	0.937226	1.15205
Amino Acids and Derivatives	Arginine; urea cycle, polyamines	Arginine Biosynthesis extended	Acetylornithine aminotransferase (EC 2.6.1.11)	0.485338	0.428014	0.397302	0.468764	0.440901	1.04014	1.063	1.01128	1.03084
Amino Acids and Derivatives	Aromatic amino acids and derivatives	Indole-pyruvate oxidoreductase complex	Indolepyruvate oxidoreductase subunit IorA (EC 1.2.7.8) - #1	0.0930091	0.0506717	0.0755843	0.0754981	0.129854	1.0403	1.0162	1.01628	0.967389
Amino Acids and Derivatives	Aromatic amino acids and derivatives	Aromatic amino acid interconversions with aryl acids	Indolepyruvate oxidoreductase subunit IorA (EC 1.2.7.8)	0.0930091	0.0506717	0.0755843	0.0754981	0.129854	1.0403	1.0162	1.01628	0.967389
Amino Acids and Derivatives	Histidine Metabolism	Histidine Biosynthesis	Imidazoleglycerol-phosphate dehydratase (EC 4.2.1.19)	0.250279	0.201609	0.257762	0.316641	0.214411	1.0405	0.994051	0.949597	1.02954
Amino Acids and Derivatives	Aromatic amino acids and derivatives	Chorismate Synthesis	Chorismate mutase II (EC 5.4.99.5)	0.0642608	0.0226405	0.0562037	0.0202831	0	1.0407	1.00763	1.0431	1.06426
Amino Acids and Derivatives	Aromatic amino acids and derivatives	Phenylalanine and Tyrosine Branches from Chorismate	Chorismate mutase II (EC 5.4.99.5) - #1	0.0642608	0.0226405	0.0562037	0.0202831	0	1.0407	1.00763	1.0431	1.06426
Amino Acids and Derivatives	Arginine; urea cycle, polyamines	Polyamine Metabolism	Spermidine Putrescine ABC transporter permease component potC (TC_3.A.1.11.1)	0.184327	0.137999	0.0813985	0.0450735	0	1.04071	1.09518	1.13325	1.18433
Amino Acids and Derivatives	Histidine Metabolism	Histidine Degradation	Histidine ammonia-lyase (EC 4.3.1.3)	0.216458	0.168187	0.108531	0.226494	0.0271788	1.04132	1.09736	0.991817	1.18427
Amino Acids and Derivatives	Glutamine, glutamate, aspartate, asparagine; ammonia assimilation	Glutamine, Glutamate, Aspartate and Asparagine Biosynthesis	Glutamate synthase [NADPH] small chain (EC 1.4.1.13)	0.801569	0.729888	0.534904	0.412422	0.69457	1.04144	1.17373	1.27552	1.06314
Amino Acids and Derivatives	Glutamine, glutamate, aspartate, asparagine; ammonia assimilation	Glutamine, Glutamate, Aspartate and Asparagine Biosynthesis	glutamine synthetase family protein	0.118375	0.0733122	0.149231	0.189309	0.069457	1.04199	0.973151	0.940357	1.04574
Amino Acids and Derivatives	Lysine, threonine, methionine, and cysteine	Threonine degradation	Monoamine oxidase (1.4.3.4) - #1	0.0794805	0.035578	0.0271328	0.0236636	0	1.04239	1.05096	1.05453	1.07948
Amino Acids and Derivatives	Alanine, serine, and glycine	Glycine and Serine Utilization	Monoamine oxidase (1.4.3.4)	0.0794805	0.035578	0.0271328	0.0236636	0	1.04239	1.05096	1.05453	1.07948
Amino Acids and Derivatives	Glutamine, glutamate, aspartate, asparagine; ammonia assimilation	Glutamine, Glutamate, Aspartate and Asparagine Biosynthesis	Ferredoxin-dependent glutamate synthase (EC 1.4.7.1)	0.126831	0.0797809	0.238381	0.161138	0.356345	1.04357	0.909922	0.970454	0.830785
Amino Acids and Derivatives	Lysine, threonine, methionine, and cysteine	Threonine and Homoserine Biosynthesis	Aspartate-semialdehyde dehydrogenase (EC 1.2.1.11) - #1	0.58173	0.515342	0.552347	0.500316	0.552636	1.04381	1.01893	1.05426	1.01874
Amino Acids and Derivatives	Lysine, threonine, methionine, and cysteine	Lysine Biosynthesis DAP Pathway	Aspartate-semialdehyde dehydrogenase (EC 1.2.1.11)	0.58173	0.515342	0.552347	0.500316	0.552636	1.04381	1.01893	1.05426	1.01874
Amino Acids and Derivatives	Lysine, threonine, methionine, and cysteine	Cysteine Biosynthesis	Sulfate adenylyltransferase subunit 1 (EC 2.7.7.4)	0.302702	0.247968	0.193806	0.299739	0.368424	1.04386	1.09122	1.00228	0.951973
Amino Acids and Derivatives	Lysine, threonine, methionine, and cysteine	Methionine Biosynthesis	Betaine--homocysteine S-methyltransferase (EC 2.1.1.5)	0.0845537	0.0388123	0.00387612	0	0	1.04403	1.08037	1.08455	1.08455
Amino Acids and Derivatives	Alanine, serine, and glycine	Glycine and Serine Utilization	Seryl-tRNA synthetase (EC 6.1.1.11)	0.568201	0.500248	0.467072	0.397773	0.588875	1.04529	1.06893	1.12193	0.986988
Amino Acids and Derivatives	Branched-chain amino acids	Branched-Chain Amino Acid Biosynthesis	Threonine dehydratase biosynthetic (EC 4.3.1.19)	0.123448	0.0733122	0.158921	0.253538	0.256689	1.04671	0.969392	0.896222	0.893975
Amino Acids and Derivatives	Glutamine, glutamate, aspartate, asparagine; ammonia assimilation	Glutamine synthetases	Glutamine synthetase type II, eukaryotic (EC 6.3.1.2) - #1	0.21984	0.164952	0.110469	0.169026	0.0754968	1.04712	1.09849	1.04347	1.13421
Amino Acids and Derivatives	Glutamine, glutamate, aspartate, asparagine; ammonia assimilation	Glutamine, Glutamate, Aspartate and Asparagine Biosynthesis	Glutamine synthetase type II, eukaryotic (EC 6.3.1.2)	0.21984	0.164952	0.110469	0.169026	0.0754968	1.04712	1.09849	1.04347	1.13421
Amino Acids and Derivatives	Alanine, serine, and glycine	Glycine Biosynthesis	L-threonine 3-dehydrogenase (EC 1.1.1.103)	0.130213	0.0787028	0.0581418	0.0157757	0.093616	1.04775	1.06811	1.11266	1.03346
Amino Acids and Derivatives	Lysine, threonine, methionine, and cysteine	Threonine degradation	L-threonine 3-dehydrogenase (EC 1.1.1.103) - #1	0.130213	0.0787028	0.0581418	0.0157757	0.093616	1.04775	1.06811	1.11266	1.03346
Amino Acids and Derivatives	Alanine, serine, and glycine	Glycine cleavage system	Aminomethyltransferase (glycine cleavage system T protein) (EC 2.1.2.10) - #1	0.495485	0.421545	0.284895	0.326783	0.298967	1.05201	1.1639	1.12715	1.15129
Amino Acids and Derivatives	Alanine, serine, and glycine	Glycine and Serine Utilization	Aminomethyltransferase (glycine cleavage system T protein) (EC 2.1.2.10)	0.495485	0.421545	0.284895	0.326783	0.298967	1.05201	1.1639	1.12715	1.15129
Amino Acids and Derivatives	Aromatic amino acids and derivatives	Aromatic amino acid degradation	5-carboxymethyl-2-hydroxymuconate semialdehyde dehydrogenase (EC 1.2.1.60)	0.162343	0.104578	0.102717	0.120572	0.0634173	1.0523	1.05407	1.03728	1.09303
Amino Acids and Derivatives	Aromatic amino acids and derivatives	Aromatic amino acid interconversions with aryl acids	Indolepyruvate oxidoreductase subunit IorB II (EC 1.2.7.8)	0.0574965	0.00431248	0.0232567	0	0	1.05296	1.03346	1.0575	1.0575
Amino Acids and Derivatives	Branched-chain amino acids	Valine degradation	Methylmalonate-semialdehyde dehydrogenase (EC 1.2.1.27) - #1	0.463354	0.389202	0.375984	0.273821	0.504318	1.05338	1.0635	1.14879	0.972769
Amino Acids and Derivatives	Branched-chain amino acids	Branched chain amino acid degradation regulons	Methylmalonate-semialdehyde dehydrogenase (EC 1.2.1.27)	0.463354	0.389202	0.375984	0.273821	0.504318	1.05338	1.0635	1.14879	0.972769
Amino Acids and Derivatives	Branched-chain amino acids	Branched-Chain Amino Acid Biosynthesis	Ketol-acid reductoisomerase (EC 1.1.1.86)	0.537762	0.459279	0.596922	0.563418	0.323126	1.05378	0.962953	0.983589	1.16222
Amino Acids and Derivatives	Branched-chain amino acids	Branched-Chain Amino Acid Biosynthesis	Dihydroxy-acid dehydratase (EC 4.2.1.9)	1.28691	1.1676	1.14152	0.788786	0.990518	1.05504	1.06789	1.27847	1.1489
Amino Acids and Derivatives	Branched-chain amino acids	Branched-Chain Amino Acid Biosynthesis	(R)-citramalate synthase (EC 2.3.1.182)	0.840464	0.743903	0.629869	0.24565	0.196292	1.05537	1.12921	1.47751	1.53847
Amino Acids and Derivatives	Lysine, threonine, methionine, and cysteine	Cysteine Biosynthesis	Cysteine synthase B (EC 2.5.1.47)	0.180945	0.10889	0.114346	0.101415	0.135894	1.06498	1.05977	1.07221	1.03966
Amino Acids and Derivatives	Arginine; urea cycle, polyamines	Polyamine Metabolism	ABC transporter, periplasmic spermidine putrescine-binding protein PotD (TC 3.A.1.11.1)	0.216458	0.134765	0.226753	0.0777517	0.0603974	1.07199	0.991608	1.1287	1.14717
Amino Acids and Derivatives	Glutamine, glutamate, aspartate, asparagine; ammonia assimilation	Glutamine, Glutamate, Aspartate and Asparagine Biosynthesis	Glutamate synthase [NADPH] large chain (EC 1.4.1.13)	2.54676	2.29424	2.26365	1.87393	1.54013	1.07665	1.08674	1.23411	1.39629
Amino Acids and Derivatives	Lysine, threonine, methionine, and cysteine	Lysine Biosynthesis DAP Pathway	2,3,4,5-tetrahydropyridine-2,6-dicarboxylate N-succinyltransferase (EC 2.3.1.117)	0.470119	0.364405	0.344975	0.271568	0.196292	1.07748	1.09305	1.15615	1.2289
Amino Acids and Derivatives	Arginine; urea cycle, polyamines	Arginine and Ornithine Degradation	Agmatine deiminase (EC 3.5.3.12)	0.0794805	0	0.0678321	0.104796	0	1.07948	1.01091	0.977086	1.07948
Amino Acids and Derivatives	Arginine; urea cycle, polyamines	Polyamine Metabolism	Agmatine deiminase (EC 3.5.3.12) - #1	0.0794805	0	0.0678321	0.104796	0	1.07948	1.01091	0.977086	1.07948
Amino Acids and Derivatives	Branched-chain amino acids	Valine degradation	Branched-chain alpha-keto acid dehydrogenase, E1 component, beta subunit (EC 1.2.4.4) - #3	0.248588	0.155249	0.358541	0.513838	0.341245	1.0808	0.919065	0.824783	0.930917
Amino Acids and Derivatives	Branched-chain amino acids	Leucine Degradation and HMG-CoA Metabolism	Branched-chain alpha-keto acid dehydrogenase, E1 component, beta subunit (EC 1.2.4.4) - #2	0.248588	0.155249	0.358541	0.513838	0.341245	1.0808	0.919065	0.824783	0.930917
Amino Acids and Derivatives	Branched-chain amino acids	Isoleucine degradation	Branched-chain alpha-keto acid dehydrogenase, E1 component, beta subunit (EC 1.2.4.4) - #1	0.248588	0.155249	0.358541	0.513838	0.341245	1.0808	0.919065	0.824783	0.930917
Amino Acids and Derivatives	Branched-chain amino acids	Branched chain amino acid degradation regulons	Branched-chain alpha-keto acid dehydrogenase, E1 component, beta subunit (EC 1.2.4.4)	0.248588	0.155249	0.358541	0.513838	0.341245	1.0808	0.919065	0.824783	0.930917
Amino Acids and Derivatives	Alanine, serine, and glycine	Serine Biosynthesis	Phosphoserine aminotransferase (EC 2.6.1.52) - #1	0.527615	0.410764	0.52909	0.261426	0.398623	1.08283	0.999035	1.21102	1.09223
Amino Acids and Derivatives	Alanine, serine, and glycine	Glycine and Serine Utilization	Phosphoserine aminotransferase (EC 2.6.1.52)	0.527615	0.410764	0.52909	0.261426	0.398623	1.08283	0.999035	1.21102	1.09223
Amino Acids and Derivatives	Aromatic amino acids and derivatives	Chorismate: Intermediate for synthesis of Tryptophan, PAPA antibiotics, PABA, 3-hydroxyanthranilate and more.	Isochorismatase (EC 3.3.2.1)	0.111611	0.0258749	0	0.041693	0.0603974	1.08357	1.11161	1.06712	1.0483
Amino Acids and Derivatives	Branched-chain amino acids	Leucine Biosynthesis	3-isopropylmalate dehydrogenase (EC 1.1.1.85) - #1	0.684885	0.551998	0.64925	0.48792	0.456	1.08562	1.02161	1.13238	1.1572
Amino Acids and Derivatives	Branched-chain amino acids	Branched-Chain Amino Acid Biosynthesis	3-isopropylmalate dehydrogenase (EC 1.1.1.85)	0.684885	0.551998	0.64925	0.48792	0.456	1.08562	1.02161	1.13238	1.1572
Amino Acids and Derivatives	Proline and 4-hydroxyproline	Proline Synthesis	Glutamate 5-kinase (EC 2.7.2.11)	0.500558	0.380577	0.558161	0.224241	0.22347	1.08691	0.963031	1.22571	1.22648
Amino Acids and Derivatives	Branched-chain amino acids	Leucine Degradation and HMG-CoA Metabolism	Branched-chain alpha-keto acid dehydrogenase, E1 component, alpha subunit (EC 1.2.4.4) - #2	0.248588	0.137999	0.277143	0.427071	0.247629	1.09718	0.977642	0.87493	1.00077
Amino Acids and Derivatives	Branched-chain amino acids	Valine degradation	Branched-chain alpha-keto acid dehydrogenase, E1 component, alpha subunit (EC 1.2.4.4) - #3	0.248588	0.137999	0.277143	0.427071	0.247629	1.09718	0.977642	0.87493	1.00077
Amino Acids and Derivatives	Branched-chain amino acids	Isoleucine degradation	Branched-chain alpha-keto acid dehydrogenase, E1 component, alpha subunit (EC 1.2.4.4) - #1	0.248588	0.137999	0.277143	0.427071	0.247629	1.09718	0.977642	0.87493	1.00077
Amino Acids and Derivatives	Branched-chain amino acids	Branched chain amino acid degradation regulons	Branched-chain alpha-keto acid dehydrogenase, E1 component, alpha subunit (EC 1.2.4.4)	0.248588	0.137999	0.277143	0.427071	0.247629	1.09718	0.977642	0.87493	1.00077
Amino Acids and Derivatives	Glutamine, glutamate, aspartate, asparagine; ammonia assimilation	Poly-gamma-glutamate biosynthesis	Glutamate racemase (EC 5.1.1.3) - #1	0.432915	0.301874	0.432187	0.274948	0.205351	1.10066	1.00051	1.1239	1.18879
Amino Acids and Derivatives	Glutamine, glutamate, aspartate, asparagine; ammonia assimilation	Glutamine, Glutamate, Aspartate and Asparagine Biosynthesis	Glutamate racemase (EC 5.1.1.3)	0.432915	0.301874	0.432187	0.274948	0.205351	1.10066	1.00051	1.1239	1.18879
Amino Acids and Derivatives	Alanine, serine, and glycine	Serine Biosynthesis	Serine hydroxymethyltransferase (EC 2.1.2.1) - #2	0.96053	0.779481	0.804295	0.702019	0.558676	1.10174	1.08659	1.15188	1.25782
Amino Acids and Derivatives	Alanine, serine, and glycine	Glycine and Serine Utilization	Serine hydroxymethyltransferase (EC 2.1.2.1) - #1	0.96053	0.779481	0.804295	0.702019	0.558676	1.10174	1.08659	1.15188	1.25782
Amino Acids and Derivatives	Alanine, serine, and glycine	Glycine Biosynthesis	Serine hydroxymethyltransferase (EC 2.1.2.1)	0.96053	0.779481	0.804295	0.702019	0.558676	1.10174	1.08659	1.15188	1.25782
Amino Acids and Derivatives	Arginine; urea cycle, polyamines	Arginine Biosynthesis extended	Argininosuccinate synthase (EC 6.3.4.5)	0.911489	0.714794	0.374046	0.443974	0.579815	1.1147	1.39114	1.32377	1.20994
Amino Acids and Derivatives	Proline and 4-hydroxyproline	Proline, 4-hydroxyproline uptake and utilization	4-hydroxyproline epimerase (EC 5.1.1.8)	0.262117	0.130453	0.125974	0.101415	0.0573775	1.11647	1.12091	1.1459	1.19363
Amino Acids and Derivatives	Lysine, threonine, methionine, and cysteine	Methionine Biosynthesis	5-methyltetrahydropteroyltriglutamate--homocysteine methyltransferase (EC 2.1.1.14)	0.255352	0.118593	0.205434	0.0721176	0.111735	1.12226	1.04141	1.17091	1.12918
Amino Acids and Derivatives	Histidine Metabolism	Histidine Degradation	Urocanate hydratase (EC 4.2.1.49)	0.400785	0.247968	0.315904	0.353827	0.114755	1.12245	1.0645	1.03469	1.25659
Amino Acids and Derivatives	Arginine; urea cycle, polyamines	Arginine and Ornithine Degradation	Ornithine decarboxylase (EC 4.1.1.17)	0.289174	0.144468	0.306213	0.342558	0.341245	1.12644	0.986955	0.960237	0.961177
Amino Acids and Derivatives	Arginine; urea cycle, polyamines	Polyamine Metabolism	Ornithine decarboxylase (EC 4.1.1.17) - #1	0.289174	0.144468	0.306213	0.342558	0.341245	1.12644	0.986955	0.960237	0.961177
Amino Acids and Derivatives	Arginine; urea cycle, polyamines	Polyamine Metabolism	Arginine decarboxylase (EC 4.1.1.19) - #1	0.292556	0.144468	0.306213	0.354954	0.214411	1.12939	0.989544	0.953948	1.06435
Amino Acids and Derivatives	Arginine; urea cycle, polyamines	Arginine and Ornithine Degradation	Arginine decarboxylase (EC 4.1.1.19)	0.292556	0.144468	0.306213	0.354954	0.214411	1.12939	0.989544	0.953948	1.06435
Amino Acids and Derivatives	Arginine; urea cycle, polyamines	Polyamine Metabolism	4-aminobutyraldehyde dehydrogenase (EC 1.2.1.19)	0.77113	0.555232	0.408931	0.201704	0.211391	1.13882	1.25707	1.47385	1.46206
Amino Acids and Derivatives	Arginine; urea cycle, polyamines	Putrescine utilization pathways	4-aminobutyraldehyde dehydrogenase (EC 1.2.1.19) - #1	0.77113	0.555232	0.408931	0.201704	0.211391	1.13882	1.25707	1.47385	1.46206
Amino Acids and Derivatives	Aromatic amino acids and derivatives	Common Pathway For Synthesis of Aromatic Compounds (DAHP synthase to chorismate)	2-keto-3-deoxy-D-arabino-heptulosonate-7-phosphate synthase II (EC 2.5.1.54) - #1	0.578347	0.37842	0.387612	0.181421	0.531497	1.14504	1.13746	1.33597	1.03059
Amino Acids and Derivatives	Aromatic amino acids and derivatives	Chorismate Synthesis	2-keto-3-deoxy-D-arabino-heptulosonate-7-phosphate synthase II (EC 2.5.1.54)	0.578347	0.37842	0.387612	0.181421	0.531497	1.14504	1.13746	1.33597	1.03059
Amino Acids and Derivatives	Arginine; urea cycle, polyamines	Polyamine Metabolism	Putrescine transport ATP-binding protein PotA (TC 3.A.1.11.1)	0.375419	0.20053	0.176363	0.0957811	0.220451	1.14568	1.16921	1.25519	1.12698
Amino Acids and Derivatives	Lysine, threonine, methionine, and cysteine	Methionine Degradation	S-adenosylmethionine synthetase (EC 2.5.1.6) - #1	0.948693	0.700778	0.759719	0.802308	0.534517	1.14577	1.10739	1.08122	1.26991
Amino Acids and Derivatives	Lysine, threonine, methionine, and cysteine	Methionine Biosynthesis	S-adenosylmethionine synthetase (EC 2.5.1.6)	0.948693	0.700778	0.759719	0.802308	0.534517	1.14577	1.10739	1.08122	1.26991
Amino Acids and Derivatives	Lysine, threonine, methionine, and cysteine	Lysine Biosynthesis DAP Pathway	Dihydrodipicolinate synthase (EC 4.2.1.52)	0.478574	0.281389	0.494205	0.305373	0.365404	1.15388	0.989539	1.13268	1.08288
Amino Acids and Derivatives	Lysine, threonine, methionine, and cysteine	Methionine Biosynthesis	O-acetylhomoserine sulfhydrylase (EC 2.5.1.49)	0.735617	0.476529	0.45932	0.672722	0.591895	1.17547	1.18933	1.0376	1.09028
Amino Acids and Derivatives	Lysine, threonine, methionine, and cysteine	Methionine Biosynthesis	O-succinylhomoserine sulfhydrylase (EC 2.5.1.48)	0.681503	0.404295	0.383736	0.589336	0.555656	1.1974	1.21519	1.05799	1.0809
Amino Acids and Derivatives	Amino Acids and Derivatives	Creatine and Creatinine Degradation	Sarcosine dehydrogenase (EC 1.5.99.1)	0.40924	0.16064	0.0523276	0.0631029	0.169113	1.21419	1.33916	1.32559	1.20539
Amino Acids and Derivatives	Lysine, threonine, methionine, and cysteine	Methionine Biosynthesis	Adenosylhomocysteinase (EC 3.3.1.1)	1.33257	0.904543	1.44579	0.996124	0.93616	1.22474	0.953706	1.16855	1.20474
Amino Acids and Derivatives	Lysine, threonine, methionine, and cysteine	Methionine Degradation	Adenosylhomocysteinase (EC 3.3.1.1) - #1	1.33257	0.904543	1.44579	0.996124	0.93616	1.22474	0.953706	1.16855	1.20474
Amino Acids and Derivatives	Arginine; urea cycle, polyamines	Polyamine Metabolism	S-adenosylmethionine decarboxylase proenzyme (EC 4.1.1.50), prokaryotic class 1B	0.277336	0.0344999	0	0.00450735	0	1.23474	1.27734	1.2716	1.27734
Carbohydrates	Central carbohydrate metabolism	Pyruvate metabolism I: anaplerotic reactions, PEP	Phosphoenolpyruvate carboxylase (EC 4.1.1.31)	0.319026	0.689674	0.634746	0.66757	0.232936	0.780639	0.806869	0.790987	1.06983
Carbohydrates	Fermentation	Fermentations: Mixed acid	Phosphoenolpyruvate carboxylase (EC 4.1.1.31) - #1	0.319026	0.689674	0.634746	0.66757	0.232936	0.780639	0.806869	0.790987	1.06983
Carbohydrates	Central carbohydrate metabolism	Pyruvate Alanine Serine Interconversions	Alanine racemase (EC 5.1.1.1) - #1	0	0.176909	0.12068	0	0	0.849684	0.892315	1	1
Carbohydrates	Central carbohydrate metabolism	Dehydrogenase complexes	Dihydrolipoamide dehydrogenase of branched-chain alpha-keto acid dehydrogenase (EC 1.8.1.4) - #3	0.125381	0.295446	0.164564	0.330097	0.117644	0.868721	0.966354	0.84609	1.00692
Carbohydrates	CO2 fixation	Calvin-Benson cycle	Transketolase (EC 2.2.1.1) - #1	0.629693	0.841438	0.664525	0.482237	0.837627	0.885011	0.979074	1.09948	0.886846
Carbohydrates	Central carbohydrate metabolism	Pentose phosphate pathway	Transketolase (EC 2.2.1.1) - #2	0.629693	0.841438	0.664525	0.482237	0.837627	0.885011	0.979074	1.09948	0.886846
Carbohydrates	Carbohydrates	Sugar utilization in Thermotogales	Transketolase (EC 2.2.1.1)	0.629693	0.841438	0.664525	0.482237	0.837627	0.885011	0.979074	1.09948	0.886846
Carbohydrates	One-carbon Metabolism	Serine-glyoxylate cycle	Methylmalonyl-CoA mutase (EC 5.4.99.2)	0.710494	0.917769	0.415328	0.833541	0.59528	0.891919	1.20855	0.932891	1.07222
Carbohydrates	Organic acids	Propionyl-CoA to Succinyl-CoA Module	Methylmalonyl-CoA mutase (EC 5.4.99.2) - #1	0.710494	0.917769	0.415328	0.833541	0.59528	0.891919	1.20855	0.932891	1.07222
Carbohydrates	One-carbon Metabolism	Serine-glyoxylate cycle	ethylmalonyl-CoA mutase	0.710494	0.917769	0.415328	0.856592	0.618809	0.891919	1.20855	0.921309	1.05664
Carbohydrates	Central carbohydrate metabolism	Glycolysis and Gluconeogenesis	6-phosphofructokinase (EC 2.7.1.11) - #1	0.210362	0.355613	0.423164	0.253566	0.164702	0.892852	0.850472	0.965535	1.0392
Carbohydrates	Monosaccharides	D-Tagatose and Galactitol Utilization	6-phosphofructokinase (EC 2.7.1.11) - #3	0.210362	0.355613	0.423164	0.253566	0.164702	0.892852	0.850472	0.965535	1.0392
Carbohydrates	Central carbohydrate metabolism	Glycolysis and Gluconeogenesis, including Archaeal enzymes	6-phosphofructokinase (EC 2.7.1.11) - #2	0.210362	0.355613	0.423164	0.253566	0.164702	0.892852	0.850472	0.965535	1.0392
Carbohydrates	Aminosugars	N-Acetyl-Galactosamine and Galactosamine Utilization	6-phosphofructokinase (EC 2.7.1.11)	0.210362	0.355613	0.423164	0.253566	0.164702	0.892852	0.850472	0.965535	1.0392
Carbohydrates	CO2 fixation	Photorespiration (oxidative C2 cycle)	Glycine dehydrogenase [decarboxylating] (glycine cleavage system P protein) (EC 1.4.4.2) - #2	0.870704	1.09378	0.725648	0.832619	0.543517	0.893458	1.08406	1.02078	1.21198
Carbohydrates	CO2 fixation	Photorespiration (oxidative C2 cycle)	D-Lactate dehydrogenase, cytochrome c-dependent (EC 1.1.2.4)	0.0947326	0.216421	0.175535	0.0995823	0.0752923	0.899962	0.931263	0.995589	1.01808
Carbohydrates	Central carbohydrate metabolism	Glycolate, glyoxylate interconversions	D-Lactate dehydrogenase, cytochrome c-dependent (EC 1.1.2.4) - #1	0.0947326	0.216421	0.175535	0.0995823	0.0752923	0.899962	0.931263	0.995589	1.01808
Carbohydrates	CO2 fixation	Calvin-Benson cycle	Fructose-bisphosphate aldolase class II (EC 4.1.2.13)	0.104484	0.219115	0.183371	0.222216	0.26117	0.905972	0.933337	0.903674	0.875762
Carbohydrates	Central carbohydrate metabolism	Glycolysis and Gluconeogenesis	Fructose-bisphosphate aldolase class II (EC 4.1.2.13) - #1	0.104484	0.219115	0.183371	0.222216	0.26117	0.905972	0.933337	0.903674	0.875762
Carbohydrates	Monosaccharides	Mannose Metabolism	Mannose-6-phosphate isomerase (EC 5.3.1.8) - #1	0	0.100577	0.214717	0.138309	0.230583	0.908614	0.823237	0.878496	0.812623
Carbohydrates	Carbohydrates	Sugar utilization in Thermotogales	Mannose-6-phosphate isomerase (EC 5.3.1.8)	0	0.100577	0.214717	0.138309	0.230583	0.908614	0.823237	0.878496	0.812623
Carbohydrates	Di- and oligosaccharides	Trehalose Biosynthesis	1,4-alpha-glucan (glycogen) branching enzyme, GH-13-type (EC 2.4.1.18)	0.098912	0.206543	0.145757	0.273851	0.324698	0.910794	0.959115	0.862669	0.829556
Carbohydrates	Polysaccharides	Glycogen metabolism	1,4-alpha-glucan (glycogen) branching enzyme, GH-13-type (EC 2.4.1.18) - #1	0.098912	0.206543	0.145757	0.273851	0.324698	0.910794	0.959115	0.862669	0.829556
Carbohydrates	Fermentation	Acetone Butanol Ethanol Synthesis	Butyryl-CoA dehydrogenase (EC 1.3.99.2) - #3	0.398434	0.527133	0.440404	0.38542	0.425872	0.915725	0.970862	1.00939	0.980757
Carbohydrates	Organic acids	Isobutyryl-CoA to Propionyl-CoA Module	Butyryl-CoA dehydrogenase (EC 1.3.99.2) - #6	0.398434	0.527133	0.440404	0.38542	0.425872	0.915725	0.970862	1.00939	0.980757
Carbohydrates	Fermentation	Acetyl-CoA fermentation to Butyrate	Butyryl-CoA dehydrogenase (EC 1.3.99.2) - #4	0.398434	0.527133	0.440404	0.38542	0.425872	0.915725	0.970862	1.00939	0.980757
Carbohydrates	Fermentation	Butanol Biosynthesis	Butyryl-CoA dehydrogenase (EC 1.3.99.2) - #5	0.398434	0.527133	0.440404	0.38542	0.425872	0.915725	0.970862	1.00939	0.980757
Carbohydrates	Central carbohydrate metabolism	Methylglyoxal Metabolism	Hydroxyacylglutathione hydrolase (EC 3.1.2.6)	0	0.0853112	0.0611237	0.063622	0.270582	0.921395	0.942397	0.940184	0.787041
Carbohydrates	Central carbohydrate metabolism	Dehydrogenase complexes	Cytosol aminopeptidase PepA (EC 3.4.11.1)	0.438835	0.56036	0.343233	0.347616	0.310581	0.922117	1.07117	1.06769	1.09786
Carbohydrates	One-carbon Metabolism	Serine-glyoxylate cycle	Methylcrotonyl-CoA carboxylase biotin-containing subunit (EC 6.4.1.4) - #3	0.0362213	0.12213	0.0611237	0.158594	0.157643	0.923442	0.976532	0.894378	0.895113
Carbohydrates	Monosaccharides	D-gluconate and ketogluconates metabolism	2-dehydro-3-deoxygluconate kinase (EC 2.7.1.45) - #3	0	0.0826172	0.122247	0.12079	0	0.923688	0.891069	0.892228	1
Carbohydrates	Monosaccharides	D-Galacturonate and D-Glucuronate Utilization	2-dehydro-3-deoxygluconate kinase (EC 2.7.1.45) - #2	0	0.0826172	0.122247	0.12079	0	0.923688	0.891069	0.892228	1
Carbohydrates	Central carbohydrate metabolism	Entner-Doudoroff Pathway	2-dehydro-3-deoxygluconate kinase (EC 2.7.1.45) - #1	0	0.0826172	0.122247	0.12079	0	0.923688	0.891069	0.892228	1
Carbohydrates	Carbohydrates	Sugar utilization in Thermotogales	2-dehydro-3-deoxygluconate kinase (EC 2.7.1.45)	0	0.0826172	0.122247	0.12079	0	0.923688	0.891069	0.892228	1
Carbohydrates	Central carbohydrate metabolism	Glycolysis and Gluconeogenesis, including Archaeal enzymes	Glucose-6-phosphate isomerase (EC 5.3.1.9) - #1	0.364999	0.475049	0.362041	0.414004	0.26117	0.925393	1.00217	0.965343	1.08233
Carbohydrates	Central carbohydrate metabolism	Glycolysis and Gluconeogenesis	Glucose-6-phosphate isomerase (EC 5.3.1.9)	0.364999	0.475049	0.362041	0.414004	0.26117	0.925393	1.00217	0.965343	1.08233
Carbohydrates	Monosaccharides	Mannose Metabolism	Phosphomannomutase (EC 5.4.2.8)	0.56143	0.685184	0.606536	0.377122	0.421167	0.926564	0.971924	1.13384	1.0987
Carbohydrates	Carbohydrates	Sugar utilization in Thermotogales	Xylulose kinase (EC 2.7.1.17)	0.122595	0.207441	0.205313	0.1881	0	0.929731	0.931372	0.944866	1.1226
Carbohydrates	Monosaccharides	Xylose utilization	Xylulose kinase (EC 2.7.1.17) - #1	0.122595	0.207441	0.205313	0.1881	0	0.929731	0.931372	0.944866	1.1226
Carbohydrates	Aminosugars	Chitin and N-acetylglucosamine utilization	N-acetylglucosamine related transporter, NagX	0	0.0745351	0.0752292	0.0544014	0	0.930635	0.930034	0.948405	1
Carbohydrates	Organic acids	Propionate-CoA to Succinate Module	Methylisocitrate lyase (EC 4.1.3.30) - #1	0	0.073637	0.0548546	0.0829853	0.110586	0.931413	0.947998	0.923374	0.900426
Carbohydrates	Organic acids	Methylcitrate cycle	Methylisocitrate lyase (EC 4.1.3.30)	0	0.073637	0.0548546	0.0829853	0.110586	0.931413	0.947998	0.923374	0.900426
Carbohydrates	One-carbon Metabolism	Serine-glyoxylate cycle	5,10-methylenetetrahydrofolate reductase (EC 1.5.1.20) - #2	0.108664	0.188583	0.280542	0.200087	0.202348	0.932761	0.865777	0.92382	0.922082
Carbohydrates	One-carbon Metabolism	One-carbon metabolism by tetrahydropterines	5,10-methylenetetrahydrofolate reductase (EC 1.5.1.20) - #1	0.108664	0.188583	0.280542	0.200087	0.202348	0.932761	0.865777	0.92382	0.922082
Carbohydrates	Central carbohydrate metabolism	Pyruvate metabolism I: anaplerotic reactions, PEP	NADP-dependent malic enzyme (EC 1.1.1.40)	0.300915	0.394228	0.48899	0.635298	0.602339	0.933072	0.87369	0.795522	0.811885
Carbohydrates	Aminosugars	N-Acetyl-Galactosamine and Galactosamine Utilization	N-acetylgalactosamine 6-sulfate sulfatase (GALNS)	0	0.070943	0	0.0147529	0.0117644	0.933757	1	0.985462	0.988372
Carbohydrates	Aminosugars	Chitin and N-acetylglucosamine utilization	Beta-hexosaminidase (EC 3.2.1.52) - #1	0.0654769	0.1356	0.0893347	0.103271	0.178819	0.93825	0.978099	0.965744	0.903851
Carbohydrates	Carbohydrates	Sugar utilization in Thermotogales	Beta-hexosaminidase (EC 3.2.1.52)	0.0654769	0.1356	0.0893347	0.103271	0.178819	0.93825	0.978099	0.965744	0.903851
Carbohydrates	Aminosugars	N-Acetyl-Galactosamine and Galactosamine Utilization	Beta-hexosaminidase (EC 3.2.1.52) - #2	0.0654769	0.1356	0.0893347	0.103271	0.178819	0.93825	0.978099	0.965744	0.903851
Carbohydrates	Central carbohydrate metabolism	Entner-Doudoroff Pathway	2,3-bisphosphoglycerate-independent phosphoglycerate mutase (EC 5.4.2.1)	0.0933395	0.165234	0.119113	0.184412	0.192937	0.9383	0.97697	0.923108	0.916511
Carbohydrates	Central carbohydrate metabolism	Glycolysis and Gluconeogenesis	2,3-bisphosphoglycerate-independent phosphoglycerate mutase (EC 5.4.2.1) - #1	0.0933395	0.165234	0.119113	0.184412	0.192937	0.9383	0.97697	0.923108	0.916511
Carbohydrates	Central carbohydrate metabolism	Glycolysis and Gluconeogenesis, including Archaeal enzymes	2,3-bisphosphoglycerate-independent phosphoglycerate mutase (EC 5.4.2.1) - #2	0.0933395	0.165234	0.119113	0.184412	0.192937	0.9383	0.97697	0.923108	0.916511
Carbohydrates	Monosaccharides	L-rhamnose utilization	Predicted rhamnulose-1-phosphate aldolase (EC 4.1.2.19)	0.112843	0.184093	0.315022	0.267397	0.0870568	0.939828	0.846254	0.878054	1.02372
Carbohydrates	Monosaccharides	L-rhamnose utilization	Predicted lactaldehyde dehydrogenase (EC 1.2.1.22)	0.112843	0.184093	0.315022	0.267397	0.0870568	0.939828	0.846254	0.878054	1.02372
Carbohydrates	One-carbon Metabolism	Serine-glyoxylate cycle	Propionyl-CoA carboxylase beta chain (EC 6.4.1.3)	0.477842	0.56934	0.249197	0.200087	0.183525	0.941697	1.18303	1.23145	1.24868
Carbohydrates	Central carbohydrate metabolism	Pyruvate Alanine Serine Interconversions	Branched-chain amino acid aminotransferase (EC 2.6.1.42) - #7	0.369178	0.448108	0.33383	0.335629	0.38352	0.945495	1.0265	1.02512	0.989634
Carbohydrates	Central carbohydrate metabolism	Dehydrogenase complexes	Pyruvate dehydrogenase E1 component beta subunit (EC 1.2.4.1)	0.0766219	0.137396	0.167698	0.25541	0.178819	0.946567	0.922003	0.857586	0.913305
Carbohydrates	Central carbohydrate metabolism	Pyruvate metabolism II: acetyl-CoA, acetogenesis from pyruvate	Pyruvate dehydrogenase E1 component beta subunit (EC 1.2.4.1) - #1	0.0766219	0.137396	0.167698	0.25541	0.178819	0.946567	0.922003	0.857586	0.913305
Carbohydrates	Di- and oligosaccharides	Maltose and Maltodextrin Utilization	4-alpha-glucanotransferase (amylomaltase) (EC 2.4.1.25)	0	0.0547788	0	0.0248956	0.082351	0.948066	1	0.975709	0.923915
Carbohydrates	Polysaccharides	Glycogen metabolism	4-alpha-glucanotransferase (amylomaltase) (EC 2.4.1.25) - #1	0	0.0547788	0	0.0248956	0.082351	0.948066	1	0.975709	0.923915
Carbohydrates	Monosaccharides	Deoxyribose and Deoxynucleoside Catabolism	Putative deoxyribonuclease YjjV	0	0.0529827	0.0344801	0.0285838	0.0494106	0.949683	0.966669	0.972211	0.952916
Carbohydrates	Central carbohydrate metabolism	Pentose phosphate pathway	Transaldolase (EC 2.2.1.2) - #1	0.310667	0.378961	0.288379	0.310734	0.423519	0.950474	1.0173	0.999949	0.920723
Carbohydrates	Carbohydrates	Sugar utilization in Thermotogales	Transaldolase (EC 2.2.1.2)	0.310667	0.378961	0.288379	0.310734	0.423519	0.950474	1.0173	0.999949	0.920723
Carbohydrates	Monosaccharides	Deoxyribose and Deoxynucleoside Catabolism	Deoxyribose-phosphate aldolase (EC 4.1.2.4)	0.323205	0.388839	0.244495	0.149373	0	0.952742	1.06325	1.15124	1.32321
Carbohydrates	Central carbohydrate metabolism	Pyruvate metabolism II: acetyl-CoA, acetogenesis from pyruvate	Pyruvate dehydrogenase E1 component alpha subunit (EC 1.2.4.1) - #1	0.0599044	0.112252	0.12068	0.199165	0.145879	0.952936	0.945769	0.883869	0.924971
Carbohydrates	Central carbohydrate metabolism	Dehydrogenase complexes	Pyruvate dehydrogenase E1 component alpha subunit (EC 1.2.4.1)	0.0599044	0.112252	0.12068	0.199165	0.145879	0.952936	0.945769	0.883869	0.924971
Carbohydrates	Fermentation	Acetyl-CoA fermentation to Butyrate	Acetoacetyl-CoA reductase (EC 1.1.1.36)	0.154637	0.211033	0.0956038	0.119868	0.235289	0.953432	1.05388	1.03105	0.93471
Carbohydrates	One-carbon Metabolism	Serine-glyoxylate cycle	Acetoacetyl-CoA reductase (EC 1.1.1.36) - #1	0.154637	0.211033	0.0956038	0.119868	0.235289	0.953432	1.05388	1.03105	0.93471
Carbohydrates	Monosaccharides	L-rhamnose utilization	Rhamnulokinase (EC 2.7.1.5) - #1	0	0.0475947	0.0376146	0	0	0.954568	0.963749	1	1
Carbohydrates	Carbohydrates	Sugar utilization in Thermotogales	Rhamnulokinase (EC 2.7.1.5)	0	0.0475947	0.0376146	0	0	0.954568	0.963749	1	1
Carbohydrates	Monosaccharides	Mannose Metabolism	Alpha-1,2-mannosidase	0.0306488	0.0781271	0	0.0700764	0	0.955962	1.03065	0.963154	1.03065
Carbohydrates	Central carbohydrate metabolism	Pyruvate metabolism I: anaplerotic reactions, PEP	Malolactic enzyme (EC 1.-.-.-)	0	0.0449006	0	0	0	0.957029	1	1	1
Carbohydrates	Central carbohydrate metabolism	Pyruvate metabolism II: acetyl-CoA, acetogenesis from pyruvate	Acetyl-coenzyme A synthetase (EC 6.2.1.1) - #1	0.950112	1.0372	0.783638	0.941422	1.07997	0.957249	1.09333	1.00448	0.937565
Carbohydrates	Polysaccharides	Cellulosome	SusC, outer membrane protein involved in starch binding	0	0.0431046	0	0.128166	0.00470577	0.958677	1	0.886394	0.995316
Carbohydrates	Organic acids	Methylcitrate cycle	PrpF protein involved in 2-methylcitrate cycle	0.0208969	0.0646569	0.0360473	0.0525573	0.0752923	0.958898	0.985377	0.96992	0.949413
Carbohydrates	Organic acids	Propionate-CoA to Succinate Module	PrpF protein involved in 2-methylcitrate cycle - #1	0.0208969	0.0646569	0.0360473	0.0525573	0.0752923	0.958898	0.985377	0.96992	0.949413
Carbohydrates	CO2 fixation	Photorespiration (oxidative C2 cycle)	Glycine cleavage system H protein - #2	0.130954	0.178705	0.128517	0.121712	0.127056	0.959489	1.00216	1.00824	1.00346
Carbohydrates	Di- and oligosaccharides	Lactose and Galactose Uptake and Utilization	Galactokinase (EC 2.7.1.6) - #1	0	0.0413086	0	0	0	0.96033	1	1	1
Carbohydrates	Carbohydrates	Sugar utilization in Thermotogales	Galactokinase (EC 2.7.1.6)	0	0.0413086	0	0	0	0.96033	1	1	1
Carbohydrates	Monosaccharides	D-Tagatose and Galactitol Utilization	D-tagatose 3-epimerase (EC 5.3.1.-)	0	0.0404106	0.0266437	0.0119868	0	0.961159	0.974048	0.988155	1
Carbohydrates	Carbohydrates	Sugar utilization in Thermotogales	D-mannonate oxidoreductase (EC 1.1.1.57)	0	0.0404106	0.0109709	0.0341162	0	0.961159	0.989148	0.967009	1
Carbohydrates	Monosaccharides	D-Galacturonate and D-Glucuronate Utilization	D-mannonate oxidoreductase (EC 1.1.1.57) - #1	0	0.0404106	0.0109709	0.0341162	0	0.961159	0.989148	0.967009	1
Carbohydrates	Carbohydrates	Sugar utilization in Thermotogales	Xylose isomerase (EC 5.3.1.5)	0.207576	0.255934	0.213149	0.180723	0.202348	0.961497	0.995406	1.02274	1.00435
Carbohydrates	Monosaccharides	Xylose utilization	Xylose isomerase (EC 5.3.1.5) - #1	0.207576	0.255934	0.213149	0.180723	0.202348	0.961497	0.995406	1.02274	1.00435
Carbohydrates	Monosaccharides	D-galactarate, D-glucarate and D-glycerate catabolism	5-dehydro-4-deoxyglucarate dehydratase (EC 4.2.1.41) - #1	0.0139313	0.0538808	0	0.00645441	0	0.962093	1.01393	1.00743	1.01393
Carbohydrates	Monosaccharides	D-Galacturonate and D-Glucuronate Utilization	5-dehydro-4-deoxyglucarate dehydratase (EC 4.2.1.41)	0.0139313	0.0538808	0	0.00645441	0	0.962093	1.01393	1.00743	1.01393
Carbohydrates	Fermentation	Acetoin, butanediol metabolism	Acetoin dehydrogenase E1 component beta-subunit (EC 1.2.4.-) - #1	0	0.0386145	0.0062691	0.0414926	0	0.962821	0.99377	0.96016	1
Carbohydrates	Central carbohydrate metabolism	Dehydrogenase complexes	Acetoin dehydrogenase E1 component beta-subunit (EC 1.2.4.-)	0	0.0386145	0.0062691	0.0414926	0	0.962821	0.99377	0.96016	1
Carbohydrates	Sugar alcohols	Inositol catabolism	Methylmalonate-semialdehyde dehydrogenase [inositol] (EC 1.2.1.27)	0.189465	0.234381	0.178669	0.078375	0.171761	0.963612	1.00916	1.10302	1.01511
Carbohydrates	CO2 fixation	Carboxysome	NADH dehydrogenase (EC 1.6.99.3)	0.0571182	0.0960874	0.2586	0.16136	0.199995	0.964447	0.839916	0.910241	0.880935
Carbohydrates	One-carbon Metabolism	Serine-glyoxylate cycle	Aconitate hydratase (EC 4.2.1.3) - #2	0.955685	1.02733	0.708408	0.745945	0.774099	0.964662	1.14474	1.12013	1.10235
Carbohydrates	Central carbohydrate metabolism	Glyoxylate bypass	Aconitate hydratase (EC 4.2.1.3)	0.955685	1.02733	0.708408	0.745945	0.774099	0.964662	1.14474	1.12013	1.10235
Carbohydrates	Organic acids	Propionate-CoA to Succinate Module	Aconitate hydratase (EC 4.2.1.3) - #3	0.955685	1.02733	0.708408	0.745945	0.774099	0.964662	1.14474	1.12013	1.10235
Carbohydrates	Central carbohydrate metabolism	TCA Cycle	Aconitate hydratase (EC 4.2.1.3) - #1	0.955685	1.02733	0.708408	0.745945	0.774099	0.964662	1.14474	1.12013	1.10235
Carbohydrates	CO2 fixation	Calvin-Benson cycle	Phosphoglycerate kinase (EC 2.7.2.3)	0.431869	0.483131	0.401222	0.478548	0.402343	0.965437	1.02187	0.968429	1.02105
Carbohydrates	Central carbohydrate metabolism	Entner-Doudoroff Pathway	Phosphoglycerate kinase (EC 2.7.2.3) - #1	0.431869	0.483131	0.401222	0.478548	0.402343	0.965437	1.02187	0.968429	1.02105
Carbohydrates	Central carbohydrate metabolism	Glycolysis and Gluconeogenesis	Phosphoglycerate kinase (EC 2.7.2.3) - #2	0.431869	0.483131	0.401222	0.478548	0.402343	0.965437	1.02187	0.968429	1.02105
Carbohydrates	Central carbohydrate metabolism	Glycolysis and Gluconeogenesis, including Archaeal enzymes	Phosphoglycerate kinase (EC 2.7.2.3) - #3	0.431869	0.483131	0.401222	0.478548	0.402343	0.965437	1.02187	0.968429	1.02105
Carbohydrates	Fermentation	Acetyl-CoA fermentation to Butyrate	Enoyl-CoA hydratase (EC 4.2.1.17) - #2	0.696563	0.756127	0.578325	0.657428	0.776452	0.966082	1.07491	1.02361	0.955029
Carbohydrates	Fermentation	Butanol Biosynthesis	Enoyl-CoA hydratase (EC 4.2.1.17) - #3	0.696563	0.756127	0.578325	0.657428	0.776452	0.966082	1.07491	1.02361	0.955029
Carbohydrates	Di- and oligosaccharides	Beta-Glucoside Metabolism	Periplasmic beta-glucosidase (EC 3.2.1.21)	0	0.0350225	0	0.0488691	0.0870568	0.966163	1	0.953408	0.919915
Carbohydrates	Organic acids	Tricarballylate Utilization	TcuA: flavoprotein used to oxidize tricarballylate to cis-aconitate	0.0195038	0.0547788	0.0814983	0.078375	0.169408	0.966557	0.942677	0.945407	0.871812
Carbohydrates	Polysaccharides	Glycogen metabolism	Glycogen synthase, ADP-glucose transglucosylase (EC 2.4.1.21)	0.0362213	0.071841	0.062691	0	0.0635279	0.966768	0.975092	1.03622	0.974324
Carbohydrates	One-carbon Metabolism	Serine-glyoxylate cycle	5-formyltetrahydrofolate cyclo-ligase (EC 6.3.3.2) - #1	0	0.0341245	0.115978	0.0922058	0.0305875	0.967002	0.896075	0.915578	0.97032
Carbohydrates	One-carbon Metabolism	One-carbon metabolism by tetrahydropterines	5-formyltetrahydrofolate cyclo-ligase (EC 6.3.3.2)	0	0.0341245	0.115978	0.0922058	0.0305875	0.967002	0.896075	0.915578	0.97032
Carbohydrates	Central carbohydrate metabolism	Pyruvate Alanine Serine Interconversions	Omega-amino acid--pyruvate aminotransferase (EC 2.6.1.18)	0.0515457	0.0871072	0.090902	0.132776	0.112939	0.967288	0.963923	0.928291	0.944837
Carbohydrates	Carbohydrates	Sugar utilization in Thermotogales	Beta-glucosidase (EC 3.2.1.21)	0.0543319	0.0898013	0	0.0866735	0.214113	0.967453	1.05433	0.970238	0.868397
Carbohydrates	Di- and oligosaccharides	Fructooligosaccharides(FOS) and Raffinose Utilization	Beta-glucosidase (EC 3.2.1.21) - #2	0.0543319	0.0898013	0	0.0866735	0.214113	0.967453	1.05433	0.970238	0.868397
Carbohydrates	Di- and oligosaccharides	Beta-Glucoside Metabolism	Beta-glucosidase (EC 3.2.1.21) - #1	0.0543319	0.0898013	0	0.0866735	0.214113	0.967453	1.05433	0.970238	0.868397
Carbohydrates	Central carbohydrate metabolism	Pyruvate metabolism II: acetyl-CoA, acetogenesis from pyruvate	Acetate permease ActP (cation/acetate symporter)	0.135133	0.173316	0.152026	0.224982	0.0917625	0.967457	0.985337	0.926653	1.03973
Carbohydrates	Central carbohydrate metabolism	Pyruvate Alanine Serine Interconversions	L-serine dehydratase (EC 4.3.1.17) - #1	0	0.0332265	0.028211	0.0673103	0.0729395	0.967842	0.972563	0.936935	0.932019
Carbohydrates	Monosaccharides	Deoxyribose and Deoxynucleoside Catabolism	Putative deoxyribose-specific ABC transporter, permease protein	0	0.0323285	0.0125382	0.00461029	0	0.968684	0.987617	0.995411	1
Carbohydrates	Central carbohydrate metabolism	Glyoxylate bypass	Malate synthase (EC 2.3.3.9) - #1	0.0376144	0.070943	0.0736619	0.0414926	0.0682337	0.968879	0.966426	0.996276	0.971337
Carbohydrates	CO2 fixation	Photorespiration (oxidative C2 cycle)	Malate synthase (EC 2.3.3.9)	0.0376144	0.070943	0.0736619	0.0414926	0.0682337	0.968879	0.966426	0.996276	0.971337
Carbohydrates	CO2 fixation	CO2 uptake, carboxysome	Hypothetical transmembrane protein coupled to NADH-ubiquinone oxidoreductase chain 5 homolog	0.0153244	0.0475947	0	0.238813	0.136467	0.969196	1.01532	0.819594	0.893404
Carbohydrates	Di- and oligosaccharides	Lactose and Galactose Uptake and Utilization	Alpha-galactosidase (EC 3.2.1.22) - #2	0.125381	0.160744	0.0595565	0	0.26117	0.969534	1.06212	1.12538	0.892331
Carbohydrates	Di- and oligosaccharides	Melibiose Utilization	Alpha-galactosidase (EC 3.2.1.22) - #3	0.125381	0.160744	0.0595565	0	0.26117	0.969534	1.06212	1.12538	0.892331
Carbohydrates	Di- and oligosaccharides	Fructooligosaccharides(FOS) and Raffinose Utilization	Alpha-galactosidase (EC 3.2.1.22) - #1	0.125381	0.160744	0.0595565	0	0.26117	0.969534	1.06212	1.12538	0.892331
Carbohydrates	Carbohydrates	Sugar utilization in Thermotogales	Alpha-galactosidase (EC 3.2.1.22)	0.125381	0.160744	0.0595565	0	0.26117	0.969534	1.06212	1.12538	0.892331
Carbohydrates	Central carbohydrate metabolism	Dehydrogenase complexes	Dihydrolipoamide dehydrogenase of 2-oxoglutarate dehydrogenase (EC 1.8.1.4)	0.125381	0.160744	0.183371	0.218528	0.284699	0.969534	0.950996	0.923558	0.875988
Carbohydrates	Central carbohydrate metabolism	TCA Cycle	Dihydrolipoamide dehydrogenase of 2-oxoglutarate dehydrogenase (EC 1.8.1.4) - #1	0.125381	0.160744	0.183371	0.218528	0.284699	0.969534	0.950996	0.923558	0.875988
Carbohydrates	Monosaccharides	D-Galacturonate and D-Glucuronate Utilization	Hexuronate transporter	0.00696563	0.0377165	0.00470183	0.0230515	0	0.970367	1.00225	0.984277	1.00697
Carbohydrates	Monosaccharides	Xylose utilization	Xylose ABC transporter, permease protein XylH	0.0961257	0.129314	0.125382	0.0811411	0	0.970612	0.974003	1.01386	1.09613
Carbohydrates	Di- and oligosaccharides	Beta-Glucoside Metabolism	Beta-glucanase precursor (EC 3.2.1.73)	0	0.0296344	0	0	0.00470577	0.971219	1	1	0.995316
Carbohydrates	Monosaccharides	L-rhamnose utilization	Predicted L-rhamnose isomerase RhaI (EC 5.3.1.14)	0.033435	0.0637589	0.0485855	0.0414926	0.021176	0.971494	0.985551	0.992263	1.012
Carbohydrates	Central carbohydrate metabolism	Dehydrogenase complexes	Dihydrolipoamide acyltransferase component of branched-chain alpha-keto acid dehydrogenase complex (EC 2.3.1.168) - #4	0.31624	0.353817	0.343233	0.343928	0.150585	0.972243	0.979904	0.979398	1.14397
Carbohydrates	One-carbon Metabolism	Serine-glyoxylate cycle	Malyl-CoA lyase (EC 4.1.3.24) - #1	0.0571182	0.0871072	0.0141055	0.0221294	0.157643	0.972414	1.04241	1.03423	0.913164
Carbohydrates	CO2 fixation	Photorespiration (oxidative C2 cycle)	Malyl-CoA lyase (EC 4.1.3.24)	0.0571182	0.0871072	0.0141055	0.0221294	0.157643	0.972414	1.04241	1.03423	0.913164
Carbohydrates	Carbohydrates	Unknown carbohydrate utilization ( cluster Ydj )	Peptide methionine sulfoxide reductase MsrB (EC 1.8.4.12)	0.154637	0.186787	0.158295	0.131854	0.150585	0.97291	0.996842	1.02013	1.00352
Carbohydrates	Fermentation	Acetyl-CoA fermentation to Butyrate	Electron transfer flavoprotein, beta subunit - #3	0.153244	0.184991	0.0987383	0.145685	0.22823	0.973209	1.04961	1.0066	0.938948
Carbohydrates	Fermentation	Acetone Butanol Ethanol Synthesis	Electron transfer flavoprotein, beta subunit - #2	0.153244	0.184991	0.0987383	0.145685	0.22823	0.973209	1.04961	1.0066	0.938948
Carbohydrates	Monosaccharides	L-fucose utilization	2,4-diketo-3-deoxy-L-fuconate hydrolase	0	0.0269404	0.0219419	0.0138309	0.0164702	0.973766	0.978529	0.986358	0.983797
Carbohydrates	Monosaccharides	L-fucose utilization temp	2,4-diketo-3-deoxy-L-fuconate hydrolase - #1	0	0.0269404	0.0219419	0.0138309	0.0164702	0.973766	0.978529	0.986358	0.983797
Carbohydrates	Central carbohydrate metabolism	Pyruvate metabolism I: anaplerotic reactions, PEP	Aerobic C4-dicarboxylate transporter for fumarate, L-malate, D-malate, succunate, aspartate - #1	0.0473663	0.0754331	0.0125382	0.0995823	0.103527	0.973902	1.0344	0.952513	0.949108
Carbohydrates	Central carbohydrate metabolism	Entner-Doudoroff Pathway	Gluconolactonase (EC 3.1.1.17)	0.0390075	0.0664529	0.0391819	0.0562456	0	0.974265	0.999832	0.98368	1.03901
Carbohydrates	Monosaccharides	D-Galacturonate and D-Glucuronate Utilization	Predicted D-tagaturonate epimerase - #1	0.0139313	0.0404106	0.00940365	0	0.103527	0.974549	1.00449	1.01393	0.91881
Carbohydrates	Carbohydrates	Sugar utilization in Thermotogales	Predicted D-tagaturonate epimerase	0.0139313	0.0404106	0.00940365	0	0.103527	0.974549	1.00449	1.01393	0.91881
Carbohydrates	Sugar alcohols	Inositol catabolism	Inositol transport system sugar-binding protein	0	0.0260424	0	0	0	0.974619	1	1	1
Carbohydrates	Central carbohydrate metabolism	Entner-Doudoroff Pathway	Gluconokinase (EC 2.7.1.12) - #1	0	0.0251444	0	0	0	0.975472	1	1	1
Carbohydrates	Monosaccharides	D-gluconate and ketogluconates metabolism	Gluconokinase (EC 2.7.1.12) - #2	0	0.0251444	0	0	0	0.975472	1	1	1
Carbohydrates	Carbohydrates	Sugar utilization in Thermotogales	Gluconokinase (EC 2.7.1.12)	0	0.0251444	0	0	0	0.975472	1	1	1
Carbohydrates	Monosaccharides	D-Galacturonate and D-Glucuronate Utilization	2-dehydro-3-deoxyphosphogluconate aldolase (EC 4.1.2.14) - #2	0	0.0251444	0.0423164	0.0507132	0.0635279	0.975472	0.959402	0.951734	0.940267
Carbohydrates	Carbohydrates	Sugar utilization in Thermotogales	2-dehydro-3-deoxyphosphogluconate aldolase (EC 4.1.2.14)	0	0.0251444	0.0423164	0.0507132	0.0635279	0.975472	0.959402	0.951734	0.940267
Carbohydrates	Central carbohydrate metabolism	Entner-Doudoroff Pathway	2-dehydro-3-deoxyphosphogluconate aldolase (EC 4.1.2.14) - #1	0	0.0251444	0.0423164	0.0507132	0.0635279	0.975472	0.959402	0.951734	0.940267
Carbohydrates	Monosaccharides	Deoxyribose and Deoxynucleoside Catabolism	Thymidine phosphorylase (EC 2.4.2.4)	0.296736	0.328673	0.188073	0.198243	0.0423519	0.975963	1.09146	1.0822	1.24405
Carbohydrates	Central carbohydrate metabolism	Pentose phosphate pathway	Transketolase, N-terminal section (EC 2.2.1.1) - #2	0.0278625	0.0529827	0.079931	0.123556	0.061175	0.976144	0.951785	0.91483	0.968608
Carbohydrates	CO2 fixation	Calvin-Benson cycle	Transketolase, N-terminal section (EC 2.2.1.1) - #1	0.0278625	0.0529827	0.079931	0.123556	0.061175	0.976144	0.951785	0.91483	0.968608
Carbohydrates	Carbohydrates	Sugar utilization in Thermotogales	Transketolase, N-terminal section (EC 2.2.1.1)	0.0278625	0.0529827	0.079931	0.123556	0.061175	0.976144	0.951785	0.91483	0.968608
Carbohydrates	Central carbohydrate metabolism	Pentose phosphate pathway	Ribose-phosphate pyrophosphokinase (EC 2.7.6.1)	0.463911	0.499295	0.525037	0.426913	0.308228	0.9764	0.959918	1.02593	1.119
Carbohydrates	Monosaccharides	Deoxyribose and Deoxynucleoside Catabolism	Purine nucleoside phosphorylase (EC 2.4.2.1)	0.147671	0.175112	0.180237	0.147529	0.0517635	0.976648	0.972408	1.00012	1.09119
Carbohydrates	Central carbohydrate metabolism	TCA Cycle	Fumarate hydratase class II (EC 4.2.1.2)	0.112843	0.139192	0.373012	0.337473	0.296464	0.976871	0.810513	0.832049	0.858368
Carbohydrates	Di- and oligosaccharides	Maltose and Maltodextrin Utilization	Neopullulanase (EC 3.2.1.135) - #1	0.0153244	0.0386145	0.0767965	0.127244	0.0164702	0.977576	0.942912	0.900714	0.998873
Carbohydrates	Carbohydrates	Sugar utilization in Thermotogales	Neopullulanase (EC 3.2.1.135)	0.0153244	0.0386145	0.0767965	0.127244	0.0164702	0.977576	0.942912	0.900714	0.998873
Carbohydrates	Fermentation	Acetoin, butanediol metabolism	Acetolactate synthase large subunit (EC 2.2.1.6) - #1	0.796868	0.837846	0.992085	0.73027	0.496459	0.977703	0.902004	1.03849	1.20075
Carbohydrates	Aminosugars	N-Acetyl-Galactosamine and Galactosamine Utilization	Hypothetical secreted sugar oxidoreductase, Gfo/Idh/MocA family, GalNAc-related	0.0153244	0.0377165	0	0.00368823	0	0.978422	1.01532	1.01159	1.01532
Carbohydrates	Central carbohydrate metabolism	Pyruvate metabolism II: acetyl-CoA, acetogenesis from pyruvate	NAD-dependent protein deacetylase of SIR2 family	0.0320419	0.0547788	0	0.0525573	0	0.978444	1.03204	0.980509	1.03204
Carbohydrates	Monosaccharides	D-Galacturonate and D-Glucuronate Utilization	Altronate hydrolase (EC 4.2.1.7)	0.149065	0.173316	0.20688	0.271085	0.235289	0.97933	0.952095	0.904003	0.930199
Carbohydrates	Sugar alcohols	Erythritol utilization	Predicted erythritol ABC transporter 2, ATP-binding component	0	0.0206543	0	0	0	0.979764	1	1	1
Carbohydrates	Monosaccharides	L-Arabinose utilization	L-arabinose isomerase (EC 5.3.1.4) - #1	0	0.0206543	0.0376146	0.0488691	0.0329404	0.979764	0.963749	0.953408	0.96811
Carbohydrates	Carbohydrates	Sugar utilization in Thermotogales	L-arabinose isomerase (EC 5.3.1.4)	0	0.0206543	0.0376146	0.0488691	0.0329404	0.979764	0.963749	0.953408	0.96811
Carbohydrates	Organic acids	Glycerate metabolism	Hydroxypyruvate isomerase (EC 5.3.1.22)	0.0362213	0.0565748	0.0673928	0.113413	0.134114	0.980736	0.970797	0.930671	0.913683
Carbohydrates	One-carbon Metabolism	Formaldehyde assimilation: Ribulose monophosphate pathway	6-phospho-3-hexuloisomerase	0	0.0188583	0.00783638	0	0	0.981491	0.992225	1	1
Carbohydrates	Monosaccharides	D-gluconate and ketogluconates metabolism	High-affinity gluconate transporter GntT	0	0.0188583	0	0.0119868	0	0.981491	1	0.988155	1
Carbohydrates	Sugar alcohols	Inositol catabolism	5-deoxy-glucuronate isomerase (EC 5.3.1.-)	0	0.0179603	0.01724	0.00829853	0	0.982357	0.983052	0.99177	1
Carbohydrates	Monosaccharides	Deoxyribose and Deoxynucleoside Catabolism	Pyrimidine-nucleoside phosphorylase (EC 2.4.2.2)	0.0195038	0.0377165	0.00940365	0.0221294	0.0494106	0.982449	1.01001	0.997431	0.971501
Carbohydrates	Monosaccharides	D-Galacturonate and D-Glucuronate Utilization	4-deoxy-L-threo-5-hexosulose-uronate ketol-isomerase (EC 5.3.1.17)	0.00278625	0.0206543	0	0.00737647	0.0164702	0.982494	1.00279	0.995443	0.986538
Carbohydrates	Fermentation	Fermentations: Mixed acid	Alcohol dehydrogenase (EC 1.1.1.1) - #1	0.417938	0.44272	0.164564	0.38542	0.225877	0.982822	1.21757	1.02347	1.15667
Carbohydrates	Fermentation	Acetone Butanol Ethanol Synthesis	Alcohol dehydrogenase (EC 1.1.1.1)	0.417938	0.44272	0.164564	0.38542	0.225877	0.982822	1.21757	1.02347	1.15667
Carbohydrates	Sugar alcohols	Inositol catabolism	Inositol transport system ATP-binding protein	0.00696563	0.0242463	0.0344801	0.0129088	0	0.983128	0.973403	0.994133	1.00697
Carbohydrates	Central carbohydrate metabolism	Dehydrogenase complexes	Leucine-, isoleucine-, valine-, threonine-, and alanine-binding protein	0.0431869	0.0610649	0.114411	0.163204	0.235289	0.983151	0.936088	0.896822	0.844488
Carbohydrates	Monosaccharides	Xylose utilization	Xylanase	0.0167175	0.0341245	0.00783638	0	0.0588221	0.983167	1.00881	1.01672	0.960234
Carbohydrates	Polysaccharides	Cellulosome	SusD, outer membrane protein	0	0.0170622	0.0297782	0.0599338	0	0.983224	0.971083	0.943455	1
Carbohydrates	Carbohydrates	Sugar utilization in Thermotogales	Predicted beta-glucoside-regulated ABC transport system, permease component 2, COG0395	0.00278625	0.0197563	0	0	0	0.983359	1.00279	1.00279	1.00279
Carbohydrates	Di- and oligosaccharides	Beta-Glucoside Metabolism	Predicted beta-glucoside-regulated ABC transport system, permease component 2, COG0395 - #1	0.00278625	0.0197563	0	0	0	0.983359	1.00279	1.00279	1.00279
Carbohydrates	Aminosugars	N-Acetyl-Galactosamine and Galactosamine Utilization	GALNS arylsulfatase regulator (Fe-S oxidoreductase)	0	0.0161642	0	0.00368823	0	0.984093	1	0.996325	1
Carbohydrates	Monosaccharides	D-gluconate and ketogluconates metabolism	Gluconate transporter family protein	0	0.0161642	0	0	0.0235289	0.984093	1	1	0.977012
Carbohydrates	Organic acids	Propionate-CoA to Succinate Module	Propionate--CoA ligase (EC 6.2.1.17) - #1	0.0780151	0.0951893	0.195909	0.0765308	0.082351	0.984318	0.901419	1.00138	0.995994
Carbohydrates	Organic acids	Methylcitrate cycle	Propionate--CoA ligase (EC 6.2.1.17)	0.0780151	0.0951893	0.195909	0.0765308	0.082351	0.984318	0.901419	1.00138	0.995994
Carbohydrates	Central carbohydrate metabolism	Glycolate, glyoxylate interconversions	Glycolate dehydrogenase (EC 1.1.99.14), FAD-binding subunit GlcE - #1	0.0250763	0.0413086	0.0971711	0.0829853	0.176466	0.984412	0.93429	0.946528	0.871318
Carbohydrates	CO2 fixation	Photorespiration (oxidative C2 cycle)	Glycolate dehydrogenase (EC 1.1.99.14), FAD-binding subunit GlcE	0.0250763	0.0413086	0.0971711	0.0829853	0.176466	0.984412	0.93429	0.946528	0.871318
Carbohydrates	Central carbohydrate metabolism	Ethylmalonyl-CoA pathway of C2 assimilation	L-malyl-CoA/beta-methylmalyl-CoA lyase (EC 4.1.3.-), chloroflexus type	0	0.0152662	0	0	0	0.984963	1	1	1
Carbohydrates	Monosaccharides	L-rhamnose utilization	Predicted L-rhamnose ABC transporter, transmembrane component 1	0	0.0152662	0	0	0	0.984963	1	1	1
Carbohydrates	Carbohydrates	Sugar utilization in Thermotogales	Glycerol uptake facilitator protein	0	0.0152662	0.00940365	0.0341162	0	0.984963	0.990684	0.967009	1
Carbohydrates	Sugar alcohols	Glycerol and Glycerol-3-phosphate Uptake and Utilization	Glycerol uptake facilitator protein - #1	0	0.0152662	0.00940365	0.0341162	0	0.984963	0.990684	0.967009	1
Carbohydrates	Sugar alcohols	Glycerol fermenation to 1,3-propanediol	Glycerol uptake facilitator protein - #2	0	0.0152662	0.00940365	0.0341162	0	0.984963	0.990684	0.967009	1
Carbohydrates	Monosaccharides	D-Galacturonate and D-Glucuronate Utilization	Uronate isomerase (EC 5.3.1.12) - #1	0.0195038	0.0350225	0.0720947	0.0673103	0.0564693	0.985006	0.950946	0.955208	0.96501
Carbohydrates	Carbohydrates	Sugar utilization in Thermotogales	Uronate isomerase (EC 5.3.1.12)	0.0195038	0.0350225	0.0720947	0.0673103	0.0564693	0.985006	0.950946	0.955208	0.96501
Carbohydrates	One-carbon Metabolism	Serine-glyoxylate cycle	crotonyl-CoA reductase	0.0376144	0.0529827	0	0.00461029	0	0.985405	1.03761	1.03285	1.03761
Carbohydrates	One-carbon Metabolism	Serine-glyoxylate cycle	Phosphoenolpyruvate carboxykinase [ATP] (EC 4.1.1.49) - #1	0.011145	0.0260424	0.0266437	0.0765308	0.190584	0.985481	0.984904	0.939262	0.849285
Carbohydrates	Central carbohydrate metabolism	Pyruvate metabolism I: anaplerotic reactions, PEP	Phosphoenolpyruvate carboxykinase [ATP] (EC 4.1.1.49)	0.011145	0.0260424	0.0266437	0.0765308	0.190584	0.985481	0.984904	0.939262	0.849285
Carbohydrates	Sugar alcohols	Glycerol fermenation to 1,3-propanediol	Cob(I)alamin adenosyltransferase PduO (EC 2.5.1.17)	0.144885	0.161642	0.219419	0.173347	0.185878	0.985575	0.938878	0.975743	0.965432
Carbohydrates	Sugar alcohols	Propanediol utilization	Cob(I)alamin adenosyltransferase PduO (EC 2.5.1.17) - #1	0.144885	0.161642	0.219419	0.173347	0.185878	0.985575	0.938878	0.975743	0.965432
Carbohydrates	Central carbohydrate metabolism	HPr kinase and hprK operon in Gram-positive organisms	HPr kinase/phosphorylase (EC 2.7.1.-) (EC 2.7.4.-)	0.0752288	0.0906993	0.131651	0.0746867	0.0894097	0.985816	0.950142	1.0005	0.986983
Carbohydrates	Sugar alcohols	Mannitol Utilization	HPr kinase/phosphorylase (EC 2.7.1.-) (EC 2.7.4.-) - #1	0.0752288	0.0906993	0.131651	0.0746867	0.0894097	0.985816	0.950142	1.0005	0.986983
Carbohydrates	Central carbohydrate metabolism	Glyoxylate bypass	(R)-2-hydroxyacid dehydrogenase, similar to L-sulfolactate dehydrogenase (EC 1.1.1.272)	0	0.0143682	0.0579892	0.0756088	0	0.985835	0.945189	0.929706	1
Carbohydrates	Carbohydrates	Lacto-N-Biose I and Galacto-N-Biose Metabolic Pathway	N-acetylhexosamine 1-kinase	0.00975188	0.0242463	0	0.00645441	0	0.985849	1.00975	1.00328	1.00975
Carbohydrates	Monosaccharides	L-rhamnose utilization	Predicted L-rhamnose ABC transporter, ATP-binding component	0.0125381	0.0269404	0.0266437	0.0110647	0	0.985976	0.986261	1.00146	1.01254
Carbohydrates	Di- and oligosaccharides	Trehalose Uptake and Utilization	Trehalose-6-phosphate hydrolase (EC 3.2.1.93)	0.00417938	0.0179603	0	0	0.0117644	0.986462	1.00418	1.00418	0.992503
Carbohydrates	Di- and oligosaccharides	Beta-Glucoside Metabolism	6-phospho-beta-glucosidase (EC 3.2.1.86)	0	0.0134702	0	0	0.0141173	0.986709	1	1	0.986079
Carbohydrates	Polysaccharides	Glycogen metabolism	Predicted glycogen synthase, ADP-glucose transglucosylase (EC 2.4.1.21), Actinobacterial type	0	0.0134702	0.0862001	0.0350382	0.0964683	0.986709	0.920641	0.966148	0.912019
Carbohydrates	Organic acids	Propionate-CoA to Succinate Module	2-methylcitrate synthase (EC 2.3.3.5) - #1	0.0292557	0.0431046	0.0407492	0.0267397	0.0258817	0.986723	0.988957	1.00245	1.00329
Carbohydrates	Organic acids	Methylcitrate cycle	2-methylcitrate synthase (EC 2.3.3.5)	0.0292557	0.0431046	0.0407492	0.0267397	0.0258817	0.986723	0.988957	1.00245	1.00329
Carbohydrates	Di- and oligosaccharides	Lactose and Galactose Uptake and Utilization	Tagatose 1,6-diphosphate aldolase (EC 4.1.2.40)	0.00139313	0.0134702	0	0	0.0517635	0.988083	1.00139	1.00139	0.952109
Carbohydrates	CO2 fixation	Photorespiration (oxidative C2 cycle)	Dihydrolipoamide dehydrogenase (EC 1.8.1.4) - #2	0.0459732	0.0583708	0.0736619	0.243423	0.129409	0.988286	0.974211	0.841204	0.926125
Carbohydrates	Central carbohydrate metabolism	TCA Cycle	Dihydrolipoamide dehydrogenase (EC 1.8.1.4) - #3	0.0459732	0.0583708	0.0736619	0.243423	0.129409	0.988286	0.974211	0.841204	0.926125
Carbohydrates	Monosaccharides	L-fucose utilization	Alpha-L-fucosidase (EC 3.2.1.51) - #1	0.0264694	0.0386145	0.0767965	0.0903617	0	0.988306	0.953262	0.941403	1.02647
Carbohydrates	Monosaccharides	L-fucose utilization temp	Alpha-L-fucosidase (EC 3.2.1.51) - #2	0.0264694	0.0386145	0.0767965	0.0903617	0	0.988306	0.953262	0.941403	1.02647
Carbohydrates	Polysaccharides	Xyloglucan Utilization	Alpha-L-fucosidase (EC 3.2.1.51) - #3	0.0264694	0.0386145	0.0767965	0.0903617	0	0.988306	0.953262	0.941403	1.02647
Carbohydrates	Carbohydrates	Sugar utilization in Thermotogales	Alpha-L-fucosidase (EC 3.2.1.51)	0.0264694	0.0386145	0.0767965	0.0903617	0	0.988306	0.953262	0.941403	1.02647
Carbohydrates	Polysaccharides	Alpha-Amylase locus in Streptocococcus	Cyclomaltodextrin glucanotransferase (EC 2.4.1.19)	0	0.0116742	0	0	0	0.988461	1	1	1
Carbohydrates	Central carbohydrate metabolism	TCA Cycle	Aconitate hydratase large subunit (EC 4.2.1.3)	0	0.0116742	0.00470183	0	0	0.988461	0.99532	1	1
Carbohydrates	Monosaccharides	L-rhamnose utilization	Rhamnulokinase RhaK in alpha-proteobacteria (EC 2.7.1.5)	0	0.0116742	0	0.00922058	0	0.988461	1	0.990864	1
Carbohydrates	Monosaccharides	D-gluconate and ketogluconates metabolism	5-keto-D-gluconate 5-reductase (EC 1.1.1.69)	0	0.0116742	0.0329128	0.0230515	0	0.988461	0.968136	0.977468	1
Carbohydrates	Monosaccharides	D-gluconate and ketogluconates metabolism	L-idonate 5-dehydrogenase (EC 1.1.1.264)	0	0.0116742	0	0.0295059	0.00470577	0.988461	1	0.97134	0.995316
Carbohydrates	Central carbohydrate metabolism	Glyoxylate bypass	Malate synthase G (EC 2.3.3.9) - #1	0.0417938	0.0529827	0.144189	0.187178	0.345874	0.989374	0.910508	0.877538	0.774065
Carbohydrates	CO2 fixation	Photorespiration (oxidative C2 cycle)	Malate synthase G (EC 2.3.3.9)	0.0417938	0.0529827	0.144189	0.187178	0.345874	0.989374	0.910508	0.877538	0.774065
Carbohydrates	Fermentation	Acetoin, butanediol metabolism	Acetoin dehydrogenase E1 component alpha-subunit (EC 1.2.4.-) - #1	0.0571182	0.068249	0	0.0331941	0.0329404	0.98958	1.05712	1.02316	1.02341
Carbohydrates	Central carbohydrate metabolism	Dehydrogenase complexes	Acetoin dehydrogenase E1 component alpha-subunit (EC 1.2.4.-)	0.0571182	0.068249	0	0.0331941	0.0329404	0.98958	1.05712	1.02316	1.02341
Carbohydrates	Di- and oligosaccharides	Maltose and Maltodextrin Utilization	Maltodextrin glucosidase (EC 3.2.1.20) - #1	0.0431869	0.0538808	0	0.0387265	0.112939	0.989853	1.04319	1.00429	0.937327
Carbohydrates	Carbohydrates	Sugar utilization in Thermotogales	Maltodextrin glucosidase (EC 3.2.1.20)	0.0431869	0.0538808	0	0.0387265	0.112939	0.989853	1.04319	1.00429	0.937327
Carbohydrates	Sugar alcohols	Glycerol and Glycerol-3-phosphate Uptake and Utilization	Glycerophosphoryl diester phosphodiesterase, periplasmic (EC 3.1.4.46)	0	0.00987814	0	0	0	0.990218	1	1	1
Carbohydrates	Organic acids	Lactate utilization	Predicted D-lactate dehydrogenase, Fe-S protein, FAD/FMN-containing	0	0.00987814	0.0062691	0.0239735	0.0658808	0.990218	0.99377	0.976588	0.938191
Carbohydrates	Central carbohydrate metabolism	TCA Cycle	Isocitrate dehydrogenase [NAD] (EC 1.1.1.41)	0	0.00987814	0.0141055	0.00645441	0.0705866	0.990218	0.986091	0.993587	0.934067
Carbohydrates	Carbohydrates	Sugar utilization in Thermotogales	Mannonate dehydratase (EC 4.2.1.8)	0.0125381	0.0224503	0.0219419	0.0599338	0.0941154	0.990305	0.990798	0.955284	0.92544
Carbohydrates	Monosaccharides	D-Galacturonate and D-Glucuronate Utilization	Mannonate dehydratase (EC 4.2.1.8) - #1	0.0125381	0.0224503	0.0219419	0.0599338	0.0941154	0.990305	0.990798	0.955284	0.92544
Carbohydrates	Organic acids	Lactate utilization	Predicted L-lactate dehydrogenase, hypothetical protein subunit YkgG	0	0.00898013	0	0.00737647	0	0.9911	1	0.992678	1
Carbohydrates	Central carbohydrate metabolism	TCA Cycle	Fumarate hydratase class I (EC 4.2.1.2)	0	0.00898013	0	0.00276618	0.00705866	0.9911	1	0.997241	0.992991
Carbohydrates	Monosaccharides	D-Galacturonate and D-Glucuronate Utilization	Ketoglutarate semialdehyde dehydrogenase (EC 1.2.1.26) - #1	0.0529388	0.0619629	0	0	0	0.991502	1.05294	1.05294	1.05294
Carbohydrates	Di- and oligosaccharides	Lactose and Galactose Uptake and Utilization	Tagatose-6-phosphate kinase (EC 2.7.1.144)	0	0.00808211	0	0	0	0.991983	1	1	1
Carbohydrates	Monosaccharides	Fructose utilization	1-phosphofructokinase (EC 2.7.1.56) - #1	0	0.00808211	0	0	0	0.991983	1	1	1
Carbohydrates	Monosaccharides	D-Tagatose and Galactitol Utilization	Tagatose-6-phosphate kinase (EC 2.7.1.144) - #1	0	0.00808211	0	0	0	0.991983	1	1	1
Carbohydrates	Carbohydrates	Sugar utilization in Thermotogales	1-phosphofructokinase (EC 2.7.1.56)	0	0.00808211	0	0	0	0.991983	1	1	1
Carbohydrates	Sugar alcohols	Inositol catabolism	5-keto-2-deoxygluconokinase (EC 2.7.1.92)	0	0.00808211	0.045451	0.0202853	0	0.991983	0.956525	0.980118	1
Carbohydrates	Glycoside hydrolases	Predicted carbohydrate hydrolases	COG1649 predicted glycoside hydrolase	0	0.00808211	0.0720947	0.0590117	0	0.991983	0.932753	0.944277	1
Carbohydrates	Monosaccharides	D-gluconate and ketogluconates metabolism	Gluconate 2-dehydrogenase (EC 1.1.99.3), membrane-bound, flavoprotein	0	0.00808211	0	0.00276618	0.0117644	0.991983	1	0.997241	0.988372
Carbohydrates	Monosaccharides	L-rhamnose utilization	L-rhamnose-proton symporter	0	0.00808211	0.0062691	0.0175191	0.0564693	0.991983	0.99377	0.982783	0.946549
Carbohydrates	Organic acids	Lactate utilization	Predicted Lactate-responsive regulator, IclR family	0	0.00808211	0.00783638	0.0295059	0.103527	0.991983	0.992225	0.97134	0.906185
Carbohydrates	Aminosugars	Chitin and N-acetylglucosamine utilization	N-acetyl glucosamine transporter, NagP	0.0195038	0.0269404	0	0.0193632	0	0.992758	1.0195	1.00014	1.0195
Carbohydrates	Di- and oligosaccharides	Maltose and Maltodextrin Utilization	Maltose/maltodextrin transport ATP-binding protein MalK (EC 3.6.3.19)	0.0195038	0.0269404	0.00470183	0.0239735	0.10588	0.992758	1.01473	0.995635	0.921894
Carbohydrates	Sugar alcohols	Erythritol utilization	Predicted erythritol ABC transporter 2, substrate-binding component	0	0.0071841	0	0	0	0.992867	1	1	1
Carbohydrates	Central carbohydrate metabolism	Pyruvate metabolism II: acetyl-CoA, acetogenesis from pyruvate	Acetyl-CoA synthetase (ADP-forming) beta chain (EC 6.2.1.13)	0	0.0071841	0	0	0.0164702	0.992867	1	1	0.983797
Carbohydrates	One-carbon Metabolism	Serine-glyoxylate cycle	putative isobutyryl-CoA mutase, chain B	0.00557251	0.0125722	0	0	0	0.993087	1.00557	1.00557	1.00557
Carbohydrates	Central carbohydrate metabolism	Ethylmalonyl-CoA pathway of C2 assimilation	L-malyl-CoA/beta-methylmalyl-CoA lyase (EC 4.1.3.-)	0.0390075	0.0457986	0	0	0	0.993506	1.03901	1.03901	1.03901
Carbohydrates	CO2 fixation	Photorespiration (oxidative C2 cycle)	Glycine dehydrogenase [decarboxylating] (glycine cleavage system P2 protein) (EC 1.4.4.2) - #2	0.00975188	0.0161642	0	0.00645441	0.110586	0.99369	1.00975	1.00328	0.909207
Carbohydrates	Sugar alcohols	Propanediol utilization	Propanediol dehydratase large subunit (EC 4.2.1.28)	0	0.00628609	0	0	0	0.993753	1	1	1
Carbohydrates	Fermentation	Acetone Butanol Ethanol Synthesis	Acetyl-CoA:acetoacetyl-CoA transferase, beta subunit (EC 2.8.3.8)	0	0.00628609	0	0.00553235	0	0.993753	1	0.994498	1
Carbohydrates	Fermentation	Acetyl-CoA fermentation to Butyrate	Acetyl-CoA:acetoacetyl-CoA transferase, beta subunit (EC 2.8.3.8) - #1	0	0.00628609	0	0.00553235	0	0.993753	1	0.994498	1
Carbohydrates	Monosaccharides	L-rhamnose utilization	Predicted L-rhamnose ABC transporter, substrate-binding component	0	0.00628609	0.00313455	0.0165971	0.00470577	0.993753	0.996875	0.983674	0.995316
Carbohydrates	Organic acids	Isobutyryl-CoA to Propionyl-CoA Module	Branched-chain acyl-CoA dehydrogenase (EC 1.3.99.12) - #4	0	0.00628609	0.00313455	0.00645441	0.0588221	0.993753	0.996875	0.993587	0.944446
Carbohydrates	Monosaccharides	Fructose utilization	Fructose ABC transporter, ATP-binding component FrcA	0.0404007	0.0466967	0.0517201	0.00737647	0	0.993985	0.989237	1.03278	1.0404
Carbohydrates	Carbohydrates	Sugar utilization in Thermotogales	Galactose-1-phosphate uridylyltransferase (EC 2.7.7.10)	0.0752288	0.0817192	0.123815	0.118023	0.129409	0.994	0.956767	0.961723	0.952028
Carbohydrates	Di- and oligosaccharides	Lactose and Galactose Uptake and Utilization	Galactose-1-phosphate uridylyltransferase (EC 2.7.7.10) - #1	0.0752288	0.0817192	0.123815	0.118023	0.129409	0.994	0.956767	0.961723	0.952028
Carbohydrates	Organic acids	Isobutyryl-CoA to Propionyl-CoA Module	3-hydroxyisobutyrate dehydrogenase (EC 1.1.1.31) - #2	0.0208969	0.0269404	0	0.0239735	0.117644	0.994115	1.0209	0.996995	0.913436
Carbohydrates	Aminosugars	Chitin and N-acetylglucosamine utilization	N-Acetyl-D-glucosamine ABC transport system, sugar-binding protein	0.0195038	0.0251444	0.0517201	0.0129088	0	0.994498	0.969368	1.00651	1.0195
Carbohydrates	Central carbohydrate metabolism	Ethylmalonyl-CoA pathway of C2 assimilation	Crotonyl-CoA carboxylase/reductase, ethylmalonyl-CoA producing	0.0668701	0.072739	0	0	0	0.994529	1.06687	1.06687	1.06687
Carbohydrates	Central carbohydrate metabolism	Entner-Doudoroff Pathway	D-glycerate 2-kinase (EC 2.7.1.-) - #1	0.0571182	0.0628609	0.0720947	0.0866735	0.183525	0.994597	0.986031	0.972802	0.893195
Carbohydrates	Organic acids	Glycerate metabolism	D-glycerate 2-kinase (EC 2.7.1.-) - #3	0.0571182	0.0628609	0.0720947	0.0866735	0.183525	0.994597	0.986031	0.972802	0.893195
Carbohydrates	Monosaccharides	D-galactarate, D-glucarate and D-glycerate catabolism	D-glycerate 2-kinase (EC 2.7.1.-) - #2	0.0571182	0.0628609	0.0720947	0.0866735	0.183525	0.994597	0.986031	0.972802	0.893195
Carbohydrates	Carbohydrates	Sugar utilization in Thermotogales	D-glycerate 2-kinase (EC 2.7.1.-)	0.0571182	0.0628609	0.0720947	0.0866735	0.183525	0.994597	0.986031	0.972802	0.893195
Carbohydrates	Fermentation	Acetyl-CoA fermentation to Butyrate	3-hydroxybutyrate dehydrogenase (EC 1.1.1.30)	0	0.00538808	0	0	0	0.994641	1	1	1
Carbohydrates	Aminosugars	N-Acetyl-Galactosamine and Galactosamine Utilization	Tagatose-1,6-bisphosphate aldolase AgaY (EC 4.1.2.-)	0	0.00538808	0.0235091	0.00276618	0	0.994641	0.977031	0.997241	1
Carbohydrates	Carbohydrates	Unknown sugar utilization (cluster yphABCDEFG)	Uncharacterized protein YphG, TPR-domain containing	0	0.00538808	0	0	0.0235289	0.994641	1	1	0.977012
Carbohydrates	Di- and oligosaccharides	Lactose and Galactose Uptake and Utilization	Aldose 1-epimerase (EC 5.1.3.3)	0.0153244	0.0206543	0	0.0451809	0	0.994778	1.01532	0.971434	1.01532
Carbohydrates	Di- and oligosaccharides	Maltose and Maltodextrin Utilization	Aldose 1-epimerase (EC 5.1.3.3) - #1	0.0153244	0.0206543	0	0.0451809	0	0.994778	1.01532	0.971434	1.01532
Carbohydrates	Central carbohydrate metabolism	Dehydrogenase complexes	(Pyruvate) Oxoisovalerate Dehydrogenase Alpha & Beta Fusion like	0	0.00449006	0	0	0	0.99553	1	1	1
Carbohydrates	Central carbohydrate metabolism	TCA Cycle	Isocitrate dehydrogenase [NAD] subunit II, mitochondrial precursor (EC 1.1.1.41)	0	0.00449006	0	0	0	0.99553	1	1	1
Carbohydrates	Monosaccharides	D-galactonate catabolism	2-dehydro-3-deoxyphosphogalactonate aldolase (EC 4.1.2.21)	0	0.00449006	0	0.0119868	0	0.99553	1	0.988155	1
Carbohydrates	Di- and oligosaccharides	Maltose and Maltodextrin Utilization	Predicted maltose transporter MalT	0	0.00449006	0.0156728	0.0387265	0	0.99553	0.984569	0.962717	1
Carbohydrates	Monosaccharides	D-Galacturonate and D-Glucuronate Utilization	Predicted D-mannonate epimerase - #1	0	0.00449006	0.0250764	0.0175191	0.0117644	0.99553	0.975537	0.982783	0.988372
Carbohydrates	Carbohydrates	Sugar utilization in Thermotogales	Predicted D-mannonate epimerase	0	0.00449006	0.0250764	0.0175191	0.0117644	0.99553	0.975537	0.982783	0.988372
Carbohydrates	Monosaccharides	L-rhamnose utilization	L-rhamnose isomerase (EC 5.3.1.14)	0	0.00449006	0.0501528	0.0276618	0.0423519	0.99553	0.952242	0.973083	0.959369
Carbohydrates	Central carbohydrate metabolism	TCA Cycle	Succinyl-CoA ligase [ADP-forming] beta chain (EC 6.2.1.5)	0.409579	0.41578	0.510932	0.469328	0.376462	0.99562	0.93292	0.959336	1.02406
Carbohydrates	One-carbon Metabolism	Serine-glyoxylate cycle	Succinyl-CoA ligase [ADP-forming] beta chain (EC 6.2.1.5) - #1	0.409579	0.41578	0.510932	0.469328	0.376462	0.99562	0.93292	0.959336	1.02406
Carbohydrates	CO2 fixation	CO2 uptake, carboxysome	carboxysome shell protein CsoS3	0.00278625	0.0071841	0	0	0	0.995634	1.00279	1.00279	1.00279
Carbohydrates	Aminosugars	Chitin and N-acetylglucosamine utilization	Glucosamine-6-phosphate deaminase (EC 3.5.99.6)	0.0515457	0.0556768	0.0595565	0.094972	0	0.996087	0.992439	0.96034	1.05155
Carbohydrates	Monosaccharides	Mannose Metabolism	Predicted mannose transporter, GGP family	0.00417938	0.00808211	0	0	0.00235289	0.996129	1.00418	1.00418	1.00182
Carbohydrates	Organic acids	Lactate utilization	Predicted L-lactate dehydrogenase, Fe-S oxidoreductase subunit YkgE	0.00417938	0.00808211	0.0752292	0.0295059	0.0541164	0.996129	0.933921	0.975399	0.952627
Carbohydrates	Di- and oligosaccharides	Trehalose Uptake and Utilization	Predicted trehalose ABC transporter, permease component 1, Archaea-type - #1	0	0.00359205	0	0	0	0.996421	1	1	1
Carbohydrates	Organic acids	Lactate utilization	D-Lactate dehydrogenase (EC 1.1.2.5)	0	0.00359205	0	0	0	0.996421	1	1	1
Carbohydrates	Monosaccharides	L-rhamnose utilization	Lactaldehyde dehydrogenase involved in fucose or rhamnose utilization (EC 1.2.1.22) - #1	0	0.00359205	0	0	0	0.996421	1	1	1
Carbohydrates	Central carbohydrate metabolism	Pyruvate metabolism I: anaplerotic reactions, PEP	Oxaloacetate decarboxylase alpha chain (EC 4.1.1.3)	0	0.00359205	0	0	0	0.996421	1	1	1
Carbohydrates	Monosaccharides	L-fucose utilization	Lactaldehyde dehydrogenase involved in fucose or rhamnose utilization (EC 1.2.1.22)	0	0.00359205	0	0	0	0.996421	1	1	1
Carbohydrates	Fermentation	Acetoin, butanediol metabolism	2,3-butanediol dehydrogenase, R-alcohol forming, (R)- and (S)-acetoin-specific (EC 1.1.1.4)	0	0.00359205	0	0	0	0.996421	1	1	1
Carbohydrates	Sugar alcohols	Erythritol utilization	Predicted erythritol ABC transporter 1, ATP-binding component 1	0	0.00359205	0	0	0	0.996421	1	1	1
Carbohydrates	Carbohydrates	Sugar utilization in Thermotogales	Predicted trehalose ABC transporter, permease component 1, Archaea-type	0	0.00359205	0	0	0	0.996421	1	1	1
Carbohydrates	Carbohydrates	Sugar utilization in Thermotogales	Ribose ABC transport system, periplasmic ribose-binding protein RbsB (TC 3.A.1.2.1)	0	0.00359205	0.00470183	0	0	0.996421	0.99532	1	1
Carbohydrates	Monosaccharides	D-ribose utilization	Ribose ABC transport system, periplasmic ribose-binding protein RbsB (TC 3.A.1.2.1) - #1	0	0.00359205	0.00470183	0	0	0.996421	0.99532	1	1
Carbohydrates	Di- and oligosaccharides	Maltose and Maltodextrin Utilization	Oligo-1,6-glucosidase (EC 3.2.1.10)	0	0.00359205	0	0.00553235	0	0.996421	1	0.994498	1
Carbohydrates	Polysaccharides	Glycogen metabolism	Glycogen branching enzyme, GH-57-type, archaeal (EC 2.4.1.18)	0	0.00359205	0.062691	0.0202853	0.00941154	0.996421	0.941007	0.980118	0.990676
Carbohydrates	Monosaccharides	L-Arabinose utilization	Ribulokinase (EC 2.7.1.16)	0.0125381	0.0161642	0.0830656	0.0922058	0.0682337	0.996432	0.934882	0.927058	0.947862
Carbohydrates	Central carbohydrate metabolism	Glyoxylate bypass	Isocitrate dehydrogenase phosphatase (EC 2.7.11.5)/kinase (EC 3.1.3.-)	0.0250763	0.0287364	0.0877674	0.063622	0.0376462	0.996442	0.942367	0.96376	0.987886
Carbohydrates	Organic acids	Tricarballylate Utilization	TcuR: regulates tcuABC genes used in utilization of tricarballylate	0.00278625	0.00628609	0	0.00737647	0	0.996522	1.00279	0.995443	1.00279
Carbohydrates	Organic acids	Lactate utilization	Predicted L-lactate dehydrogenase, Iron-sulfur cluster-binding subunit YkgF - #1	0.0264694	0.0296344	0.119113	0.0507132	0.176466	0.996926	0.917217	0.976926	0.872502
Carbohydrates	Monosaccharides	L-rhamnose utilization	Predicted L-lactate dehydrogenase, Iron-sulfur cluster-binding subunit YkgF	0.0264694	0.0296344	0.119113	0.0507132	0.176466	0.996926	0.917217	0.976926	0.872502
Carbohydrates	Central carbohydrate metabolism	Pyruvate metabolism I: anaplerotic reactions, PEP	NAD-dependent malic enzyme (EC 1.1.1.38)	0.0515457	0.0547788	0	0	0	0.996935	1.05155	1.05155	1.05155
Carbohydrates	Monosaccharides	Xylose utilization	Novel Xylose regulator from LacI family	0	0.00269404	0	0	0	0.997313	1	1	1
Carbohydrates	Aminosugars	Chitin and N-acetylglucosamine utilization	PTS system, chitobiose-specific IIC component (EC 2.7.1.69)	0	0.00269404	0	0	0	0.997313	1	1	1
Carbohydrates	Sugar alcohols	Erythritol utilization	Predicted erythritol ABC transporter 2, permease component	0	0.00269404	0	0	0	0.997313	1	1	1
Carbohydrates	Sugar alcohols	Glycerol and Glycerol-3-phosphate Uptake and Utilization	Glycerol-3-phosphate transporter	0	0.00269404	0	0	0	0.997313	1	1	1
Carbohydrates	Monosaccharides	D-Galacturonate and D-Glucuronate Utilization	Xylan oligosaccharide ABC transporter, ATP-binding protein 2 - #1	0	0.00269404	0.00313455	0	0	0.997313	0.996875	1	1
Carbohydrates	Carbohydrates	Sugar utilization in Thermotogales	Xylan oligosaccharide ABC transporter, ATP-binding protein 2	0	0.00269404	0.00313455	0	0	0.997313	0.996875	1	1
Carbohydrates	Monosaccharides	L-fucose utilization	L-fuculokinase (EC 2.7.1.51)	0	0.00269404	0.00470183	0	0	0.997313	0.99532	1	1
Carbohydrates	Monosaccharides	D-gluconate and ketogluconates metabolism	2-ketogluconate kinase (EC 2.7.1.13) - #1	0	0.00269404	0	0.00276618	0	0.997313	1	0.997241	1
Carbohydrates	Monosaccharides	2-Ketogluconate Utilization	2-ketogluconate kinase (EC 2.7.1.13)	0	0.00269404	0	0.00276618	0	0.997313	1	0.997241	1
Carbohydrates	Monosaccharides	D-Sorbitol(D-Glucitol) and L-Sorbose Utilization	PTS system, glucitol/sorbitol-specific IIC component (EC 2.7.1.69)	0	0.00269404	0.0109709	0.0165971	0	0.997313	0.989148	0.983674	1
Carbohydrates	Di- and oligosaccharides	Trehalose Uptake and Utilization	Glucose/mannose:H+ symporter GlcP	0	0.00269404	0	0	0.00705866	0.997313	1	1	0.992991
Carbohydrates	Organic acids	Malonate decarboxylase	Triphosphoribosyl-dephospho-CoA synthetase (EC 2.7.8.25)	0	0.00269404	0	0	0.0117644	0.997313	1	1	0.988372
Carbohydrates	Organic acids	Propionyl-CoA to Succinyl-CoA Module	Na+/H+-dicarboxylate symporters	0	0.00269404	0	0.00645441	0.0117644	0.997313	1	0.993587	0.988372
Carbohydrates	Monosaccharides	L-rhamnose utilization	Alfa-L-rhamnosidase (EC 3.2.1.40)	0	0.00269404	0	0.0101426	0.0658808	0.997313	1	0.989959	0.938191
Carbohydrates	Sugar alcohols	Ethanolamine utilization	Ethanolamine utilization polyhedral-body-like protein EutN	0.00278625	0.00538808	0	0.00184412	0	0.997412	1.00279	1.00094	1.00279
Carbohydrates	Polysaccharides	Glycogen metabolism	Putative glycogen debranching enzyme, archaeal type, TIGR01561	0.00278625	0.00538808	0.0188073	0.00184412	0	0.997412	0.984275	1.00094	1.00279
Carbohydrates	Central carbohydrate metabolism	Glycolysis and Gluconeogenesis	NADPH-dependent glyceraldehyde-3-phosphate dehydrogenase (EC 1.2.1.13) - #1	0.0181106	0.0206543	0.0658256	0.0553235	0.0258817	0.997508	0.955232	0.964738	0.992425
Carbohydrates	CO2 fixation	Calvin-Benson cycle	NADPH-dependent glyceraldehyde-3-phosphate dehydrogenase (EC 1.2.1.13)	0.0181106	0.0206543	0.0658256	0.0553235	0.0258817	0.997508	0.955232	0.964738	0.992425
Carbohydrates	Central carbohydrate metabolism	Pyruvate Alanine Serine Interconversions	Alanine racemase, catabolic (EC 5.1.1.1) - #1	0.0459732	0.0484927	0.0846329	0.0359603	0.162349	0.997597	0.964357	1.00967	0.899879
Carbohydrates	Central carbohydrate metabolism	Pyruvate Alanine Serine Interconversions	Alanine racemase, biosynthetic (EC 5.1.1.1) - #1	0.0167175	0.0188583	0	0.00368823	0	0.997899	1.01672	1.01298	1.01672
Carbohydrates	Polysaccharides	Glycogen metabolism	Glucose-1-phosphate adenylyltransferase (EC 2.7.7.27)	0.0696563	0.071841	0.112844	0.109725	0.178819	0.997962	0.961192	0.963893	0.907396
Carbohydrates	Di- and oligosaccharides	Maltose and Maltodextrin Utilization	Multiple sugar ABC transporter, ATP-binding protein - #1	0.0195038	0.0215523	0	0.00645441	0	0.997995	1.0195	1.01297	1.0195
Carbohydrates	Di- and oligosaccharides	Fructooligosaccharides(FOS) and Raffinose Utilization	Multiple sugar ABC transporter, ATP-binding protein	0.0195038	0.0215523	0	0.00645441	0	0.997995	1.0195	1.01297	1.0195
Carbohydrates	Di- and oligosaccharides	Beta-Glucoside Metabolism	Glucokinase, ROK family (EC 2.7.1.2)	0	0.00179603	0	0	0	0.998207	1	1	1
Carbohydrates	Central carbohydrate metabolism	TCA Cycle	Putative Dihydrolipoamide dehydrogenase (EC 1.8.1.4)	0	0.00179603	0	0	0	0.998207	1	1	1
Carbohydrates	Central carbohydrate metabolism	Dihydroxyacetone kinases	DHA-specific EI component	0	0.00179603	0	0	0	0.998207	1	1	1
Carbohydrates	Central carbohydrate metabolism	Dihydroxyacetone kinases	Phosphoenolpyruvate-dihydroxyacetone phosphotransferase (EC 2.7.1.121), subunit DhaM	0	0.00179603	0	0	0	0.998207	1	1	1
Carbohydrates	Organic acids	Lactate utilization	Lactate-responsive regulator LldR in Enterobacteria, GntR family	0	0.00179603	0	0	0	0.998207	1	1	1
Carbohydrates	Sugar alcohols	Inositol catabolism	5-keto-2-deoxy-D-gluconate-6 phosphate aldolase (EC 4.1.2.29)	0	0.00179603	0.00313455	0	0	0.998207	0.996875	1	1
Carbohydrates	Di- and oligosaccharides	Maltose and Maltodextrin Utilization	Inner membrane ABC transporter permease protein YcjP	0	0.00179603	0	0.00461029	0	0.998207	1	0.995411	1
Carbohydrates	Monosaccharides	Mannose Metabolism	D-mannose isomerase (EC 5.3.1.7)	0	0.00179603	0	0.0230515	0	0.998207	1	0.977468	1
Carbohydrates	Organic acids	Malonate decarboxylase	Malonate decarboxylase beta subunit	0	0.00179603	0	0	0.00470577	0.998207	1	1	0.995316
Carbohydrates	Monosaccharides	D-gluconate and ketogluconates metabolism	L-idonate, D-gluconate, 5-keto-D-gluconate transporter	0	0.00179603	0	0	0.00941154	0.998207	1	1	0.990676
Carbohydrates	Di- and oligosaccharides	Lactose utilization	Evolved beta-D-galactosidase, alpha subunit	0	0.00179603	0	0	0.0305875	0.998207	1	1	0.97032
Carbohydrates	Central carbohydrate metabolism	Pyruvate Alanine Serine Interconversions	D-serine/D-alanine/glycine transporter - #1	0	0.00179603	0	0	0.0494106	0.998207	1	1	0.952916
Carbohydrates	Central carbohydrate metabolism	Glyoxylate bypass	Malate dehydrogenase (EC 1.1.1.37)	0.675666	0.678	0.441972	0.500678	0.22823	0.998609	1.16207	1.11661	1.36429
Carbohydrates	Central carbohydrate metabolism	TCA Cycle	Malate dehydrogenase (EC 1.1.1.37) - #1	0.675666	0.678	0.441972	0.500678	0.22823	0.998609	1.16207	1.11661	1.36429
Carbohydrates	One-carbon Metabolism	Serine-glyoxylate cycle	Malate dehydrogenase (EC 1.1.1.37) - #2	0.675666	0.678	0.441972	0.500678	0.22823	0.998609	1.16207	1.11661	1.36429
Carbohydrates	Sugar alcohols	Glycerol fermenation to 1,3-propanediol	Glycerol dehydratase large subunit (EC 4.2.1.30)	0	0.000898013	0	0	0	0.999103	1	1	1
Carbohydrates	Di- and oligosaccharides	Lactose utilization	Galactoside O-acetyltransferase (EC 2.3.1.18)	0	0.000898013	0	0	0.00705866	0.999103	1	1	0.992991
Carbohydrates	Monosaccharides	Xylose utilization	Xylose ABC transporter, periplasmic xylose-binding protein XylF	0.0431869	0.0440026	0.0579892	0.0433367	0	0.999219	0.986009	0.999856	1.04319
Carbohydrates	Monosaccharides	L-fucose utilization temp	Fucose permease - #1	0.00557251	0.00628609	0.0814983	0.0719206	0.0399991	0.999291	0.929796	0.938104	0.966898
Carbohydrates	Monosaccharides	L-fucose utilization	Fucose permease	0.00557251	0.00628609	0.0814983	0.0719206	0.0399991	0.999291	0.929796	0.938104	0.966898
Carbohydrates	Central carbohydrate metabolism	TCA Cycle	Dihydrolipoamide dehydrogenase of pyruvate dehydrogenase complex (EC 1.8.1.4) - #1	0.119809	0.120334	0.167698	0.211151	0.197642	0.999532	0.958988	0.924582	0.935011
Carbohydrates	Central carbohydrate metabolism	Pyruvate metabolism II: acetyl-CoA, acetogenesis from pyruvate	Dihydrolipoamide dehydrogenase of pyruvate dehydrogenase complex (EC 1.8.1.4)	0.119809	0.120334	0.167698	0.211151	0.197642	0.999532	0.958988	0.924582	0.935011
Carbohydrates	Monosaccharides	Xylose utilization	2-ketoglutaric semialdehyde dehydrogenase (EC 1.2.1.26) - #1	0.0167175	0.0170622	0.0203746	0.0138309	0.0235289	0.999661	0.996416	1.00285	0.993345
Carbohydrates	Monosaccharides	L-Arabinose utilization	2-ketoglutaric semialdehyde dehydrogenase (EC 1.2.1.26)	0.0167175	0.0170622	0.0203746	0.0138309	0.0235289	0.999661	0.996416	1.00285	0.993345
Carbohydrates	Central carbohydrate metabolism	Dihydroxyacetone kinases	Dihydroxyacetone kinase, ATP-dependent (EC 2.7.1.29)	0.0320419	0.0323285	0	0.00922058	0	0.999722	1.03204	1.02261	1.03204
Carbohydrates	Central carbohydrate metabolism	Methylglyoxal Metabolism	Aldehyde dehydrogenase B (EC 1.2.1.22)	0.118416	0.118538	0.131651	0.149373	0.0564693	0.999891	0.988304	0.973066	1.05864
Carbohydrates	Carbohydrates	Sugar utilization in Thermotogales	Cellobiose phosphorylase (EC 2.4.1.-)	0	0	0.00313455	0	0	1	0.996875	1	1
Carbohydrates	Carbohydrates	Conserved cluster around inner membrane protein gene yghQ, probably involved in polysaccharide biosynthesis	Conserved protein YghR, with nucleoside triphosphate hydrolase domain	0	0	0.00313455	0	0	1	0.996875	1	1
Carbohydrates	Central carbohydrate metabolism	Soluble methane monooxygenase (sMMO)	Methane monooxygenase component C (EC 1.14.13.25)	0	0	0.00313455	0	0	1	0.996875	1	1
Carbohydrates	Organic acids	Glycerate metabolism	D-glycerate transporter (predicted) - #1	0	0	0.00313455	0	0	1	0.996875	1	1
Carbohydrates	Polysaccharides	Glycogen metabolism	Maltodextrin phosphorylase (EC 2.4.1.1) - #1	0	0	0.00313455	0	0	1	0.996875	1	1
Carbohydrates	Di- and oligosaccharides	Maltose and Maltodextrin Utilization	Maltodextrin phosphorylase (EC 2.4.1.1)	0	0	0.00313455	0	0	1	0.996875	1	1
Carbohydrates	Di- and oligosaccharides	Beta-Glucoside Metabolism	Cellobiose phosphorylase (EC 2.4.1.-) - #1	0	0	0.00313455	0	0	1	0.996875	1	1
Carbohydrates	Monosaccharides	D-galactarate, D-glucarate and D-glycerate catabolism	D-glycerate transporter (predicted)	0	0	0.00313455	0	0	1	0.996875	1	1
Carbohydrates	Monosaccharides	Xylose utilization	Putative xylulose kinase (EC 2.7.1.17)	0	0	0.00470183	0	0	1	0.99532	1	1
Carbohydrates	Aminosugars	Chitin and N-acetylglucosamine utilization	N-Acetyl-D-glucosamine ABC transport system, permease protein 2	0	0	0.00470183	0	0	1	0.99532	1	1
Carbohydrates	Monosaccharides	L-rhamnose utilization	Predicted alpha-L-rhamnosidase	0	0	0.00470183	0	0	1	0.99532	1	1
Carbohydrates	Glycoside hydrolases	Predicted carbohydrate hydrolases	Carbohydrate Esterase Family 4	0	0	0.00470183	0	0	1	0.99532	1	1
Carbohydrates	Di- and oligosaccharides	Fructooligosaccharides(FOS) and Raffinose Utilization	Multiple sugar ABC transporter, membrane-spanning permease protein MsmG	0	0	0.0062691	0	0	1	0.99377	1	1
Carbohydrates	Monosaccharides	D-allose utilization	D-allose ABC transporter, permease component	0	0	0.0062691	0	0	1	0.99377	1	1
Carbohydrates	Di- and oligosaccharides	Beta-Glucoside Metabolism	Predicted beta-glucoside transporter, GPH family	0	0	0.00783638	0	0	1	0.992225	1	1
Carbohydrates	CO2 fixation	Calvin-Benson cycle	Protein CP12, regulation of Calvin cycle via association/dissociation of PRK/CP12/GAPDH complex	0	0	0.0141055	0	0	1	0.986091	1	1
Carbohydrates	Fermentation	Acetone Butanol Ethanol Synthesis	NADH-dependent butanol dehydrogenase A (EC 1.1.1.-)	0	0	0.0188073	0	0	1	0.98154	1	1
Carbohydrates	Fermentation	Butanol Biosynthesis	NADH-dependent butanol dehydrogenase A (EC 1.1.1.-) - #1	0	0	0.0188073	0	0	1	0.98154	1	1
Carbohydrates	Central carbohydrate metabolism	Pentose phosphate pathway	6-phosphogluconolactonase (EC 3.1.1.31) - #1	0	0	0.0250764	0	0	1	0.975537	1	1
Carbohydrates	Central carbohydrate metabolism	Entner-Doudoroff Pathway	6-phosphogluconolactonase (EC 3.1.1.31), eukaryotic type - #1	0	0	0.0250764	0	0	1	0.975537	1	1
Carbohydrates	Central carbohydrate metabolism	Pentose phosphate pathway	6-phosphogluconolactonase (EC 3.1.1.31), eukaryotic type - #2	0	0	0.0250764	0	0	1	0.975537	1	1
Carbohydrates	Carbohydrates	Sugar utilization in Thermotogales	6-phosphogluconolactonase (EC 3.1.1.31), eukaryotic type	0	0	0.0250764	0	0	1	0.975537	1	1
Carbohydrates	Central carbohydrate metabolism	Pyruvate metabolism II: acetyl-CoA, acetogenesis from pyruvate	Acetyl-CoA synthetase (ADP-forming) alpha and beta chains, putative	0	0	0.0250764	0	0	1	0.975537	1	1
Carbohydrates	Central carbohydrate metabolism	Entner-Doudoroff Pathway	6-phosphogluconolactonase (EC 3.1.1.31)	0	0	0.0250764	0	0	1	0.975537	1	1
Carbohydrates	CO2 fixation	Carboxysome	Carbon dioxide concentrating mechanism protein CcmK	0	0	0.0313455	0	0	1	0.969607	1	1
Carbohydrates	CO2 fixation	CO2 uptake, carboxysome	Sensory subunit of low CO2-induced protein complex, putative	0	0	0.0329128	0	0	1	0.968136	1	1
Carbohydrates	Di- and oligosaccharides	Trehalose Uptake and Utilization	Beta-phosphoglucomutase (EC 5.4.2.6) - #1	0	0	0.0344801	0	0	1	0.966669	1	1
Carbohydrates	Di- and oligosaccharides	Maltose and Maltodextrin Utilization	Beta-phosphoglucomutase (EC 5.4.2.6)	0	0	0.0344801	0	0	1	0.966669	1	1
Carbohydrates	Fermentation	Fermentations: Lactate	Acetate kinase (EC 2.7.2.1) - #3	0	0	0.0344801	0	0	1	0.966669	1	1
Carbohydrates	Central carbohydrate metabolism	Pyruvate metabolism II: acetyl-CoA, acetogenesis from pyruvate	Acetate kinase (EC 2.7.2.1) - #2	0	0	0.0344801	0	0	1	0.966669	1	1
Carbohydrates	Sugar alcohols	Ethanolamine utilization	Acetate kinase (EC 2.7.2.1) - #5	0	0	0.0344801	0	0	1	0.966669	1	1
Carbohydrates	Fermentation	Fermentations: Mixed acid	Acetate kinase (EC 2.7.2.1) - #4	0	0	0.0344801	0	0	1	0.966669	1	1
Carbohydrates	CO2 fixation	CO2 uptake, carboxysome	ribulose 1,5-bisphosphate carboxylase/oxygenase activase	0	0	0.0689601	0	0	1	0.935489	1	1
Carbohydrates	Central carbohydrate metabolism	Glycolate, glyoxylate interconversions	Phosphoglycolate phosphatase (EC 3.1.3.18) - #1	0	0	0.10344	0	0	1	0.906257	1	1
Carbohydrates	CO2 fixation	Photorespiration (oxidative C2 cycle)	Phosphoglycolate phosphatase (EC 3.1.3.18)	0	0	0.10344	0	0	1	0.906257	1	1
Carbohydrates	Monosaccharides	L-rhamnose utilization	L-rhamnonate dehydratase (EC 4.2.1.90)	0	0	0	0.000922058	0	1	1	0.999079	1
Carbohydrates	Sugar alcohols	Propanediol utilization	Propanediol utilization polyhedral body protein PduJ	0	0	0	0.000922058	0	1	1	0.999079	1
Carbohydrates	Monosaccharides	L-Arabinose utilization	L-arabinose-binding periplasmic protein precursor AraF (TC 3.A.1.2.2)	0	0	0	0.000922058	0	1	1	0.999079	1
Carbohydrates	Sugar alcohols	Ethanolamine utilization	Ethanolamine utilization protein similar to PduL	0	0	0.00156728	0.000922058	0	1	0.998435	0.999079	1
Carbohydrates	Monosaccharides	2-Ketogluconate Utilization	HTH-type transcriptional regulator PtxR	0	0	0	0.00184412	0	1	1	0.998159	1
Carbohydrates	Carbohydrates	Conserved cluster around inner membrane protein gene yghQ, probably involved in polysaccharide biosynthesis	Conserved ATP-binding protein YghS	0	0	0	0.00184412	0	1	1	0.998159	1
Carbohydrates	Carbohydrates	Sugar utilization in Thermotogales	Laminarinase (EC 3.2.1.39)	0	0	0	0.00184412	0	1	1	0.998159	1
Carbohydrates	Central carbohydrate metabolism	Glycolate, glyoxylate interconversions	Hypothetical protein GlcG in glycolate utilization operon	0	0	0	0.00184412	0	1	1	0.998159	1
Carbohydrates	Monosaccharides	D-Galacturonate and D-Glucuronate Utilization	Transcriptional regulator KdgR, KDG operon repressor	0	0	0	0.00184412	0	1	1	0.998159	1
Carbohydrates	Di- and oligosaccharides	Beta-Glucoside Metabolism	Laminarinase (EC 3.2.1.39) - #1	0	0	0	0.00184412	0	1	1	0.998159	1
Carbohydrates	CO2 fixation	CO2 uptake, carboxysome	Carboxysome protein CcmN	0	0	0	0.00184412	0	1	1	0.998159	1
Carbohydrates	Central carbohydrate metabolism	Pyruvate metabolism II: acetyl-CoA, acetogenesis from pyruvate	Lactate 2-monooxygenase (EC 1.13.12.4)	0	0	0.00470183	0.00184412	0	1	0.99532	0.998159	1
Carbohydrates	One-carbon Metabolism	Methanogenesis	Formylmethanofuran dehydrogenase subunit C (EC 1.2.99.5)	0	0	0.0062691	0.00184412	0	1	0.99377	0.998159	1
Carbohydrates	Monosaccharides	Hexose Phosphate Uptake System	Homolog of fucose/glucose/galactose permeases	0	0	0.0109709	0.00184412	0	1	0.989148	0.998159	1
Carbohydrates	Central carbohydrate metabolism	TCA Cycle	Succinyl-CoA ligase [GDP-forming] beta chain (EC 6.2.1.4)	0	0	0	0.00276618	0	1	1	0.997241	1
Carbohydrates	CO2 fixation	CO2 uptake, carboxysome	Possible carbon dioxide concentrating mechanism protein CcmK	0	0	0	0.00276618	0	1	1	0.997241	1
Carbohydrates	Monosaccharides	Mannose Metabolism	GDP-mannose mannosyl hydrolase (EC 3.6.1.-)	0	0	0	0.00276618	0	1	1	0.997241	1
Carbohydrates	Sugar alcohols	Mannitol Utilization	PTS system, mannitol-specific cryptic IIB component (EC 2.7.1.69)	0	0	0	0.00276618	0	1	1	0.997241	1
Carbohydrates	Central carbohydrate metabolism	Dihydroxyacetone kinases	Putative dihydroxyacetone kinase (EC 2.7.1.29), dihydroxyacetone binding subunit	0	0	0	0.00276618	0	1	1	0.997241	1
Carbohydrates	Monosaccharides	D-allose utilization	D-allose ABC transporter, ATPase component	0	0	0	0.00276618	0	1	1	0.997241	1
Carbohydrates	Monosaccharides	Mannose Metabolism	Endo-alpha-mannosidase	0	0	0	0.00276618	0	1	1	0.997241	1
Carbohydrates	Sugar alcohols	Mannitol Utilization	PTS system, mannitol-specific cryptic IIC component (EC 2.7.1.69)	0	0	0	0.00276618	0	1	1	0.997241	1
Carbohydrates	Central carbohydrate metabolism	Soluble methane monooxygenase (sMMO)	Methane monooxygenase component A alpha chain (EC 1.14.13.25)	0	0	0	0.00276618	0	1	1	0.997241	1
Carbohydrates	Di- and oligosaccharides	Lactose and Galactose Uptake and Utilization	Beta-galactosidase (EC 3.2.1.23), LacZ family - #1	0	0	0	0.00368823	0	1	1	0.996325	1
Carbohydrates	Carbohydrates	Sugar utilization in Thermotogales	Beta-galactosidase (EC 3.2.1.23), LacZ family	0	0	0	0.00368823	0	1	1	0.996325	1
Carbohydrates	Monosaccharides	L-rhamnose utilization	Predicted rhamnose oligosaccharide ABC transport system, permease component	0	0	0	0.00368823	0	1	1	0.996325	1
Carbohydrates	Central carbohydrate metabolism	Pyruvate Alanine Serine Interconversions	L-serine dehydratase, beta subunit (EC 4.3.1.17) - #1	0	0	0	0.00368823	0	1	1	0.996325	1
Carbohydrates	Central carbohydrate metabolism	TCA Cycle	Succinyl-CoA ligase [GDP-forming] alpha chain (EC 6.2.1.4)	0	0	0	0.00368823	0	1	1	0.996325	1
Carbohydrates	Polysaccharides	Glycogen metabolism	Predicted glycogen debranching enzyme (pullulanase-like, but lacking signal peptide)	0	0	0.00313455	0.00368823	0	1	0.996875	0.996325	1
Carbohydrates	Central carbohydrate metabolism	Glycolysis and Gluconeogenesis	Pyrophosphate--fructose 6-phosphate 1-phosphotransferase, beta subunit (EC 2.7.1.90)	0	0	0	0.00461029	0	1	1	0.995411	1
Carbohydrates	Monosaccharides	D-gluconate and ketogluconates metabolism	Gluconate permease, Bsu4004 homolog	0	0	0	0.00461029	0	1	1	0.995411	1
Carbohydrates	Organic acids	Glycerate metabolism	D-glycerate 3-kinase (EC 2.7.1.31), plant type - #1	0	0	0	0.00461029	0	1	1	0.995411	1
Carbohydrates	Monosaccharides	D-gluconate and ketogluconates metabolism	Gluconate permease	0	0	0	0.00461029	0	1	1	0.995411	1
Carbohydrates	Monosaccharides	Deoxyribose and Deoxynucleoside Catabolism	Deoxyribonucleoside regulator DeoR (transcriptional repressor)	0	0	0	0.00461029	0	1	1	0.995411	1
Carbohydrates	CO2 fixation	Photorespiration (oxidative C2 cycle)	D-glycerate 3-kinase (EC 2.7.1.31), plant type	0	0	0	0.00461029	0	1	1	0.995411	1
Carbohydrates	Monosaccharides	L-rhamnose utilization	Pedicted L-rhamnose permease, NCS1 Family	0	0	0.0109709	0.00461029	0	1	0.989148	0.995411	1
Carbohydrates	Di- and oligosaccharides	Beta-Glucoside Metabolism	Cellobiose phosphotransferase system YdjC-like protein	0	0	0	0.00553235	0	1	1	0.994498	1
Carbohydrates	Aminosugars	Chitin and N-acetylglucosamine utilization	N-Acetyl-D-glucosamine ABC transport system, permease protein 1	0	0	0	0.00553235	0	1	1	0.994498	1
Carbohydrates	One-carbon Metabolism	One-carbon metabolism by tetrahydropterines	N(5),N(10)-methenyltetrahydromethanopterin cyclohydrolase (EC 3.5.4.27) - #1	0	0	0	0.00645441	0	1	1	0.993587	1
Carbohydrates	One-carbon Metabolism	Serine-glyoxylate cycle	N(5),N(10)-methenyltetrahydromethanopterin cyclohydrolase (EC 3.5.4.27) - #2	0	0	0	0.00645441	0	1	1	0.993587	1
Carbohydrates	Central carbohydrate metabolism	Dihydroxyacetone kinases	Phosphoenolpyruvate-dihydroxyacetone phosphotransferase (EC 2.7.1.121), ADP-binding subunit DhaL	0	0	0	0.00645441	0	1	1	0.993587	1
Carbohydrates	One-carbon Metabolism	Methanogenesis	N(5),N(10)-methenyltetrahydromethanopterin cyclohydrolase (EC 3.5.4.27)	0	0	0	0.00645441	0	1	1	0.993587	1
Carbohydrates	Monosaccharides	L-rhamnose utilization	Predicted rhamnogalacturonan lyase in rhamnose utilization cluster	0	0	0	0.00645441	0	1	1	0.993587	1
Carbohydrates	Sugar alcohols	Ethanolamine utilization	Ethanolamine ammonia-lyase light chain (EC 4.3.1.7)	0	0	0.00783638	0.00645441	0	1	0.992225	0.993587	1
Carbohydrates	Polysaccharides	Cellulosome	Alpha-glucosidase SusB (EC 3.2.1.20)	0	0	0	0.00737647	0	1	1	0.992678	1
Carbohydrates	Monosaccharides	L-ascorbate utilization (and related gene clusters)	3-dehydro-L-gulonate 2-dehydrogenase (EC 1.1.1.130)	0	0	0	0.00737647	0	1	1	0.992678	1
Carbohydrates	CO2 fixation	CO2 uptake, carboxysome	Carboxysome protein CcmM	0	0	0	0.00737647	0	1	1	0.992678	1
Carbohydrates	Monosaccharides	D-gluconate and ketogluconates metabolism	Gluconate utilization system Gnt-I transcriptional repressor	0	0	0.00156728	0.00737647	0	1	0.998435	0.992678	1
Carbohydrates	CO2 fixation	CO2 uptake, carboxysome	Bicarbonate transporter, bicarbonate binding protein	0	0	0.0203746	0.00737647	0	1	0.980032	0.992678	1
Carbohydrates	Polysaccharides	Glycogen metabolism	Glycogen [starch] synthase, eukaryotic (EC 2.4.1.11)	0	0	0	0.00829853	0	1	1	0.99177	1
Carbohydrates	Monosaccharides	Deoxyribose and Deoxynucleoside Catabolism	Nucleoside permease NupC	0	0	0	0.00829853	0	1	1	0.99177	1
Carbohydrates	Sugar alcohols	Inositol catabolism	5-keto-2-deoxy-D-gluconate-6 phosphate aldolase [form 2] (EC 4.1.2.29)	0	0	0.0266437	0.00829853	0	1	0.974048	0.99177	1
Carbohydrates	Polysaccharides	Cellulosome	Alpha-amylase (Neopullulanase) SusA (EC 3.2.1.135)	0	0	0	0.0101426	0	1	1	0.989959	1
Carbohydrates	Central carbohydrate metabolism	Glycolysis and Gluconeogenesis, including Archaeal enzymes	2,3-bisphosphoglycerate-independent phosphoglycerate mutase, archaeal type (EC 5.4.2.1) - #1	0	0	0	0.0101426	0	1	1	0.989959	1
Carbohydrates	Monosaccharides	L-rhamnose utilization	L-rhamnose mutarotase	0	0	0	0.0101426	0	1	1	0.989959	1
Carbohydrates	Carbohydrates	Carbon storage regulator	Carbon storage regulator	0	0	0	0.0101426	0	1	1	0.989959	1
Carbohydrates	Central carbohydrate metabolism	Entner-Doudoroff Pathway	2,3-bisphosphoglycerate-independent phosphoglycerate mutase, archaeal type (EC 5.4.2.1)	0	0	0	0.0101426	0	1	1	0.989959	1
Carbohydrates	Monosaccharides	L-rhamnose utilization	Transcriptional regulator of rhamnose utilization, GntR family	0	0	0.00470183	0.0101426	0	1	0.99532	0.989959	1
Carbohydrates	One-carbon Metabolism	Methanogenesis	Formylmethanofuran dehydrogenase subunit A (EC 1.2.99.5)	0	0	0.00940365	0.0101426	0	1	0.990684	0.989959	1
Carbohydrates	Carbohydrates	Sugar utilization in Thermotogales	Ribose ABC transport system, high affinity permease RbsD (TC 3.A.1.2.1)	0	0	0	0.0110647	0	1	1	0.989056	1
Carbohydrates	Central carbohydrate metabolism	TCA Cycle	Putative malate dehydrogenase (EC 1.1.1.37), similar to archaeal MJ1425	0	0	0	0.0110647	0	1	1	0.989056	1
Carbohydrates	One-carbon Metabolism	Serine-glyoxylate cycle	Putative malate dehydrogenase (EC 1.1.1.37), similar to archaeal MJ1425 - #1	0	0	0	0.0110647	0	1	1	0.989056	1
Carbohydrates	Monosaccharides	D-ribose utilization	Ribose ABC transport system, high affinity permease RbsD (TC 3.A.1.2.1) - #1	0	0	0	0.0110647	0	1	1	0.989056	1
Carbohydrates	Organic acids	Propionate-CoA to Succinate Module	Propionate catabolism operon transcriptional regulator of GntR family [predicted] - #1	0	0	0	0.0147529	0	1	1	0.985462	1
Carbohydrates	Organic acids	Methylcitrate cycle	Propionate catabolism operon transcriptional regulator of GntR family [predicted]	0	0	0	0.0147529	0	1	1	0.985462	1
Carbohydrates	One-carbon Metabolism	Methanogenesis	Formylmethanofuran--tetrahydromethanopterin N-formyltransferase (EC 2.3.1.101)	0	0	0	0.0165971	0	1	1	0.983674	1
Carbohydrates	Monosaccharides	L-fucose utilization	L-fuconolactone hydrolase	0	0	0	0.0193632	0	1	1	0.981005	1
Carbohydrates	Monosaccharides	L-fucose utilization temp	L-fuconolactone hydrolase - #1	0	0	0	0.0193632	0	1	1	0.981005	1
Carbohydrates	Polysaccharides	Cellulosome	1,4-alpha-glucan branching enzyme (EC 2.4.1.18)	0	0	0	0.0202853	0	1	1	0.980118	1
Carbohydrates	One-carbon Metabolism	Methanogenesis from methylated compounds	Monomethylamine permease	0	0	0.00470183	0.0202853	0	1	0.99532	0.980118	1
Carbohydrates	Central carbohydrate metabolism	Pyruvate metabolism II: acetyl-CoA, acetogenesis from pyruvate	Protein acetyltransferase	0	0	0	0.0221294	0	1	1	0.97835	1
Carbohydrates	Di- and oligosaccharides	Fructooligosaccharides(FOS) and Raffinose Utilization	Sucrose phosphorylase (EC 2.4.1.7)	0	0	0	0.0230515	0	1	1	0.977468	1
Carbohydrates	Di- and oligosaccharides	Sucrose utilization	Sucrose phosphorylase (EC 2.4.1.7) - #1	0	0	0	0.0230515	0	1	1	0.977468	1
Carbohydrates	Di- and oligosaccharides	Sucrose utilization Shewanella	Sucrose phosphorylase (EC 2.4.1.7) - #2	0	0	0	0.0230515	0	1	1	0.977468	1
Carbohydrates	Monosaccharides	Xylose utilization	Xylonolactonase (EC 3.1.1.68)	0	0	0.0297782	0.0258176	0	1	0.971083	0.974832	1
Carbohydrates	Monosaccharides	L-Arabinose utilization	Arabinose-proton symporter	0	0	0.0235091	0.0285838	0	1	0.977031	0.972211	1
Carbohydrates	Polysaccharides	Glycogen metabolism	Alpha-glucosidase, family 31 of glycosyl hydrolases, COG1501	0	0	0	0.0304279	0	1	1	0.970471	1
Carbohydrates	Di- and oligosaccharides	Fructooligosaccharides(FOS) and Raffinose Utilization	Sucrose-6-phosphate hydrolase (EC 3.2.1.26)	0	0	0.0156728	0.032272	0	1	0.984569	0.968737	1
Carbohydrates	Di- and oligosaccharides	Sucrose utilization	Sucrose-6-phosphate hydrolase (EC 3.2.1.26) - #1	0	0	0.0156728	0.032272	0	1	0.984569	0.968737	1
Carbohydrates	Carbohydrates	Sugar utilization in Thermotogales	L-arabinose-specific 1-epimerase (mutarotase)	0	0	0.0297782	0.032272	0	1	0.971083	0.968737	1
Carbohydrates	Monosaccharides	L-Arabinose utilization	L-arabinose-specific 1-epimerase (mutarotase) - #1	0	0	0.0297782	0.032272	0	1	0.971083	0.968737	1
Carbohydrates	Sugar alcohols	Ethanolamine utilization	Ethanolamine permease	0	0	0	0.0405706	0	1	1	0.961011	1
Carbohydrates	Di- and oligosaccharides	Trehalose Biosynthesis	Alpha-amylase (EC 3.2.1.1) - #1	0	0	0.0893347	0.0544014	0	1	0.917992	0.948405	1
Carbohydrates	Di- and oligosaccharides	Maltose and Maltodextrin Utilization	Alpha-amylase (EC 3.2.1.1)	0	0	0.0893347	0.0544014	0	1	0.917992	0.948405	1
Carbohydrates	Organic acids	Lactate utilization	L-lactate permease	0	0	0.0736619	0.0562456	0	1	0.931392	0.94675	1
Carbohydrates	Polysaccharides	Alpha-Amylase locus in Streptocococcus	putative esterase	0	0	0	0.0571676	0	1	1	0.945924	1
Carbohydrates	Aminosugars	Chitin and N-acetylglucosamine utilization	N-acetylglucosamine-6-phosphate deacetylase (EC 3.5.1.25) - #1	0	0	0	0.0737647	0	1	1	0.931303	1
Carbohydrates	Carbohydrates	Sugar utilization in Thermotogales	N-acetylglucosamine-6-phosphate deacetylase (EC 3.5.1.25)	0	0	0	0.0737647	0	1	1	0.931303	1
Carbohydrates	Monosaccharides	D-Galacturonate and D-Glucuronate Utilization	Endo-1,4-beta-xylanase A precursor (EC 3.2.1.8) - #1	0	0	0.105007	0.0857514	0	1	0.904971	0.921021	1
Carbohydrates	Monosaccharides	Xylose utilization	Endo-1,4-beta-xylanase A precursor (EC 3.2.1.8) - #2	0	0	0.105007	0.0857514	0	1	0.904971	0.921021	1
Carbohydrates	Carbohydrates	Sugar utilization in Thermotogales	Endo-1,4-beta-xylanase A precursor (EC 3.2.1.8)	0	0	0.105007	0.0857514	0	1	0.904971	0.921021	1
Carbohydrates	CO2 fixation	Carboxysome	High-affnity carbon uptake protein Hat/HatR - #1	0	0	0.192775	0.0875955	0	1	0.838381	0.919459	1
Carbohydrates	CO2 fixation	CO2 uptake, carboxysome	High-affnity carbon uptake protein Hat/HatR	0	0	0.192775	0.0875955	0	1	0.838381	0.919459	1
Carbohydrates	Glycoside hydrolases	Predicted carbohydrate hydrolases	Polysaccharide deacetylase	0	0	0.10344	0.0986602	0	1	0.906257	0.910199	1
Carbohydrates	Monosaccharides	Deoxyribose and Deoxynucleoside Catabolism	Ribokinase (EC 2.7.1.15) - #2	0	0	0.0579892	0.106037	0	1	0.945189	0.904129	1
Carbohydrates	Monosaccharides	D-ribose utilization	Ribokinase (EC 2.7.1.15) - #1	0	0	0.0579892	0.106037	0	1	0.945189	0.904129	1
Carbohydrates	Carbohydrates	Sugar utilization in Thermotogales	Ribokinase (EC 2.7.1.15)	0	0	0.0579892	0.106037	0	1	0.945189	0.904129	1
Carbohydrates	Monosaccharides	2-Ketogluconate Utilization	2-ketogluconate 6-phosphate reductase (EC 1.1.1.43)	0	0	0	0	0.00235289	1	1	1	0.997653
Carbohydrates	One-carbon Metabolism	Serine-glyoxylate cycle	GDSL-like lipase/acylhydrolase	0	0	0	0	0.00235289	1	1	1	0.997653
Carbohydrates	Central carbohydrate metabolism	Peripheral Glucose Catabolism Pathways	Glucose ABC transport system, periplasmic sugar-binding protein	0	0	0	0	0.00235289	1	1	1	0.997653
Carbohydrates	Di- and oligosaccharides	Maltose and Maltodextrin Utilization	Maltose O-acetyltransferase (EC 2.3.1.79)	0	0	0	0	0.00235289	1	1	1	0.997653
Carbohydrates	Carbohydrates	Unknown carbohydrate utilization ( cluster Yeg )	Putative nucleoside transporter YegT	0	0	0.0062691	0.00276618	0.00235289	1	0.99377	0.997241	0.997653
Carbohydrates	Carbohydrates	Unknown carbohydrate utilization ( cluster Ydj )	Putative oxidoreductase YeaE, aldo/keto reductase family	0	0	0	0.00553235	0.00235289	1	1	0.994498	0.997653
Carbohydrates	Di- and oligosaccharides	Trehalose Uptake and Utilization	Trehalose 6-phosphate phosphorylase (EC 2.4.1.216)	0	0	0	0	0.00470577	1	1	1	0.995316
Carbohydrates	Monosaccharides	D-gluconate and ketogluconates metabolism	Gluconate 2-dehydrogenase (EC 1.1.99.3), membrane-bound, cytochrome c	0	0	0	0	0.00470577	1	1	1	0.995316
Carbohydrates	Fermentation	Fermentations: Mixed acid	Formate efflux transporter (TC 2.A.44 family)	0	0	0.01724	0	0.00470577	1	0.983052	1	0.995316
Carbohydrates	CO2 fixation	Photorespiration (oxidative C2 cycle)	2-oxoglutarate/malate translocator	0	0	0.0125382	0.0304279	0.00470577	1	0.987617	0.970471	0.995316
Carbohydrates	Monosaccharides	Mannose Metabolism	PTS system, mannose-specific IIC component (EC 2.7.1.69)	0	0	0	0	0.00705866	1	1	1	0.992991
Carbohydrates	Carbohydrates	Sugar utilization in Thermotogales	Xylan oligosaccharide ABC transporter, permease component 2	0	0	0	0	0.00705866	1	1	1	0.992991
Carbohydrates	Monosaccharides	L-Arabinose utilization	Alternative L-arabinose isomerase (EC 5.3.1.4)	0	0	0	0	0.00705866	1	1	1	0.992991
Carbohydrates	Aminosugars	(GlcNAc)2 Catabolic Operon	(GlcNAc)2 ABC transporter, permease component 1	0	0	0	0	0.00705866	1	1	1	0.992991
Carbohydrates	Monosaccharides	L-rhamnose utilization	Rhamnogalacturonides degradation protein RhiN - #1	0	0	0	0	0.00705866	1	1	1	0.992991
Carbohydrates	Di- and oligosaccharides	Trehalose Uptake and Utilization	Predicted trehalose permease, MFS family	0	0	0	0	0.00705866	1	1	1	0.992991
Carbohydrates	Monosaccharides	D-Galacturonate and D-Glucuronate Utilization	Rhamnogalacturonides degradation protein RhiN	0	0	0	0	0.00705866	1	1	1	0.992991
Carbohydrates	Monosaccharides	Mannose Metabolism	PTS system, mannose-specific IIB component (EC 2.7.1.69)	0	0	0	0	0.00705866	1	1	1	0.992991
Carbohydrates	Monosaccharides	D-Galacturonate and D-Glucuronate Utilization	Xylan oligosaccharide ABC transporter, permease component 2 - #1	0	0	0	0	0.00705866	1	1	1	0.992991
Carbohydrates	Organic acids	Malonate decarboxylase	Malonate decarboxylase gamma subunit	0	0	0	0	0.00705866	1	1	1	0.992991
Carbohydrates	Central carbohydrate metabolism	TCA Cycle	Aconitate hydratase X, predicted	0	0	0	0	0.00705866	1	1	1	0.992991
Carbohydrates	Monosaccharides	Mannose Metabolism	PTS system, mannose-specific IIA component (EC 2.7.1.69)	0	0	0	0.00368823	0.00705866	1	1	0.996325	0.992991
Carbohydrates	Central carbohydrate metabolism	Pyruvate Alanine Serine Interconversions	Valine--pyruvate aminotransferase (EC 2.6.1.66) - #2	0	0	0	0.0110647	0.00705866	1	1	0.989056	0.992991
Carbohydrates	Monosaccharides	D-ribose utilization	Predicted nucleoside ABC transporter, permease 2 component	0	0	0	0.0129088	0.00705866	1	1	0.987256	0.992991
Carbohydrates	Monosaccharides	Deoxyribose and Deoxynucleoside Catabolism	Predicted nucleoside ABC transporter, permease 2 component - #1	0	0	0	0.0129088	0.00705866	1	1	0.987256	0.992991
Carbohydrates	Fermentation	Fermentations: Mixed acid	Sugar/maltose fermentation stimulation protein homolog	0	0	0.0250764	0.03135	0.00705866	1	0.975537	0.969603	0.992991
Carbohydrates	Central carbohydrate metabolism	Ethylmalonyl-CoA pathway of C2 assimilation	Acetyl-CoA acetyltransferase (EC 2.3.1.9) of ethylmalonyl-CoA pathway	0	0	0	0	0.00941154	1	1	1	0.990676
Carbohydrates	Di- and oligosaccharides	Trehalose Uptake and Utilization	Putative cytoplasmic protein clustered with trehalase	0	0	0	0	0.00941154	1	1	1	0.990676
Carbohydrates	Sugar alcohols	Mannitol Utilization	Hydrolase in polyol utilization gene cluster, haloacid dehalogenase-like family	0	0	0	0	0.00941154	1	1	1	0.990676
Carbohydrates	Sugar alcohols	Erythritol utilization	Predicted erythritol ABC transporter 1, substrate-binding component	0	0	0	0	0.00941154	1	1	1	0.990676
Carbohydrates	Monosaccharides	D-Sorbitol(D-Glucitol) and L-Sorbose Utilization	Sorbitol-6-phosphate 2-dehydrogenase (EC 1.1.1.140)	0	0	0	0	0.00941154	1	1	1	0.990676
Carbohydrates	Central carbohydrate metabolism	TCA Cycle	Archaeal succinyl-CoA ligase [ADP-forming] alpha chain (EC 6.2.1.5)	0	0	0	0	0.00941154	1	1	1	0.990676
Carbohydrates	Organic acids	Tricarballylate Utilization	TcuC: integral membrane protein used to transport tricarballylate across the cell membrane	0	0	0	0	0.00941154	1	1	1	0.990676
Carbohydrates	Monosaccharides	Deoxyribose and Deoxynucleoside Catabolism	Phosphopentomutase (EC 5.4.2.7)	0	0	0	0	0.00941154	1	1	1	0.990676
Carbohydrates	Monosaccharides	L-Arabinose utilization	Predicted L-arabinose ABC transport system, ATP-binding protein	0	0	0.0062691	0	0.00941154	1	0.99377	1	0.990676
Carbohydrates	Sugar alcohols	Inositol catabolism	Glyceraldehyde-3-phosphate ketol-isomerase (EC 5.3.1.1)	0	0	0	0.00184412	0.00941154	1	1	0.998159	0.990676
Carbohydrates	Sugar alcohols	Inositol catabolism	Myo-inositol 2-dehydrogenase 1 (EC 1.1.1.18) - #1	0	0	0	0.0110647	0.00941154	1	1	0.989056	0.990676
Carbohydrates	Carbohydrates	Sugar utilization in Thermotogales	Myo-inositol 2-dehydrogenase 1 (EC 1.1.1.18)	0	0	0	0.0110647	0.00941154	1	1	0.989056	0.990676
Carbohydrates	Monosaccharides	D-galactonate catabolism	D-galactonate transporter	0	0	0	0	0.0117644	1	1	1	0.988372
Carbohydrates	Di- and oligosaccharides	Trehalose Uptake and Utilization	Trehalase (EC 3.2.1.28)	0	0	0	0	0.0117644	1	1	1	0.988372
Carbohydrates	Central carbohydrate metabolism	Particulate methane monooxygenase (pMMO)	Particulate methane monooxygenase C-subunit (EC 1.14.13.25)	0	0	0	0	0.0117644	1	1	1	0.988372
Carbohydrates	Central carbohydrate metabolism	Dehydrogenase complexes	Enoyl-CoA hydratase [branched-chain amino acid degradation] (EC 4.2.1.17)	0	0	0	0.00922058	0.0117644	1	1	0.990864	0.988372
Carbohydrates	Central carbohydrate metabolism	Ethylmalonyl-CoA pathway of C2 assimilation	Acetoacetyl-CoA reductase (EC 1.1.1.36) of ethylmalonyl-CoA pathway	0	0	0	0	0.0141173	1	1	1	0.986079
Carbohydrates	Carbohydrates	Sugar utilization in Thermotogales	Hypothetical protein TM0950	0	0	0	0	0.0141173	1	1	1	0.986079
Carbohydrates	Sugar alcohols	Glycerol and Glycerol-3-phosphate Uptake and Utilization	Glycerol-3-phosphate regulon repressor, DeoR family	0	0	0.0250764	0	0.0141173	1	0.975537	1	0.986079
Carbohydrates	Monosaccharides	D-ribose utilization	Predicted nucleoside ABC transporter, permease 1 component	0	0	0.0109709	0.00829853	0.0141173	1	0.989148	0.99177	0.986079
Carbohydrates	Monosaccharides	Deoxyribose and Deoxynucleoside Catabolism	Predicted nucleoside ABC transporter, permease 1 component - #1	0	0	0.0109709	0.00829853	0.0141173	1	0.989148	0.99177	0.986079
Carbohydrates	Central carbohydrate metabolism	Glycolate, glyoxylate interconversions	Glycolate oxidase (EC 1.1.3.15) - #1	0	0	0.0235091	0.0110647	0.0141173	1	0.977031	0.989056	0.986079
Carbohydrates	CO2 fixation	Photorespiration (oxidative C2 cycle)	Glycolate oxidase (EC 1.1.3.15)	0	0	0.0235091	0.0110647	0.0141173	1	0.977031	0.989056	0.986079
Carbohydrates	Di- and oligosaccharides	Fructooligosaccharides(FOS) and Raffinose Utilization	Multiple sugar ABC transporter, membrane-spanning permease protein MsmF	0	0	0.01724	0	0.0164702	1	0.983052	1	0.983797
Carbohydrates	Monosaccharides	D-Galacturonate and D-Glucuronate Utilization	Glucuronide transporter UidB - #1	0	0	0	0.00737647	0.0164702	1	1	0.992678	0.983797
Carbohydrates	Carbohydrates	beta-glucuronide utilization	Glucuronide transporter UidB	0	0	0	0.00737647	0.0164702	1	1	0.992678	0.983797
Carbohydrates	Organic acids	Malonate decarboxylase	Malonate utilization transcriptional regulator	0	0	0	0	0.0188231	1	1	1	0.981525
Carbohydrates	Organic acids	Methylcitrate cycle	Propionate catabolism operon regulatory protein PrpR	0	0	0.0188073	0.015675	0.0188231	1	0.98154	0.984567	0.981525
Carbohydrates	Carbohydrates	Unknown sugar utilization (cluster yphABCDEFG)	Hypothetical zinc-type alcohol dehydrogenase-like protein YphC	0	0	0	0	0.021176	1	1	1	0.979263
Carbohydrates	One-carbon Metabolism	Serine-glyoxylate cycle	cytosolic long-chain acyl-CoA thioester hydrolase family protein	0	0	0	0.00645441	0.021176	1	1	0.993587	0.979263
Carbohydrates	Organic acids	Isobutyryl-CoA to Propionyl-CoA Module	3-hydroxyacyl-CoA dehydrogenase [isoleucine degradation] (EC 1.1.1.35) - #1	0	0	0	0.0184412	0.021176	1	1	0.981893	0.979263
Carbohydrates	Monosaccharides	D-gluconate and ketogluconates metabolism	Glucose dehydrogenase, PQQ-dependent (EC 1.1.5.2) - #1	0	0	0	0.0433367	0.021176	1	1	0.958463	0.979263
Carbohydrates	Central carbohydrate metabolism	Entner-Doudoroff Pathway	Glucose dehydrogenase, PQQ-dependent (EC 1.1.5.2)	0	0	0	0.0433367	0.021176	1	1	0.958463	0.979263
Carbohydrates	Organic acids	Glycerate metabolism	2-dehydro-3-deoxyglucarate aldolase (EC 4.1.2.20) - #1	0	0	0	0	0.0235289	1	1	1	0.977012
Carbohydrates	Carbohydrates	beta-glucuronide utilization	Beta-glucuronidase (EC 3.2.1.31)	0	0	0	0	0.0235289	1	1	1	0.977012
Carbohydrates	Monosaccharides	D-galactarate, D-glucarate and D-glycerate catabolism	2-dehydro-3-deoxyglucarate aldolase (EC 4.1.2.20)	0	0	0	0	0.0235289	1	1	1	0.977012
Carbohydrates	Monosaccharides	D-Galacturonate and D-Glucuronate Utilization	Beta-glucuronidase (EC 3.2.1.31) - #1	0	0	0	0	0.0235289	1	1	1	0.977012
Carbohydrates	One-carbon Metabolism	Serine-glyoxylate cycle	Methylmalonyl-CoA mutase, small subunit (EC 5.4.99.2)	0	0	0	0.0147529	0.0235289	1	1	0.985462	0.977012
Carbohydrates	Fermentation	Acetyl-CoA fermentation to Butyrate	Butyrate-acetoacetate CoA-transferase subunit B (EC 2.8.3.9) - #1	0	0	0	0	0.0258817	1	1	1	0.974771
Carbohydrates	Monosaccharides	D-Galacturonate and D-Glucuronate Utilization	Oligogalacturonate lyase (EC 4.2.2.6)	0	0	0	0	0.0258817	1	1	1	0.974771
Carbohydrates	Di- and oligosaccharides	Lactose and Galactose Uptake and Utilization	Beta-galactosidase (EC 3.2.1.23), LacA family - #1	0	0	0.00470183	0.00553235	0.0258817	1	0.99532	0.994498	0.974771
Carbohydrates	Carbohydrates	Sugar utilization in Thermotogales	Beta-galactosidase (EC 3.2.1.23), LacA family	0	0	0.00470183	0.00553235	0.0258817	1	0.99532	0.994498	0.974771
Carbohydrates	Monosaccharides	L-Arabinose utilization	Alpha-N-arabinofuranosidase 2 (EC 3.2.1.55)	0	0	0.00313455	0.0405706	0.0258817	1	0.996875	0.961011	0.974771
Carbohydrates	Fermentation	Butanol Biosynthesis	Pyruvate formate-lyase (EC 2.3.1.54)	0	0	0	0	0.0282346	1	1	1	0.972541
Carbohydrates	Carbohydrates	Sugar utilization in Thermotogales	Iron-containing alcohol dehydrogenase	0	0	0	0	0.0282346	1	1	1	0.972541
Carbohydrates	Fermentation	Fermentations: Mixed acid	Pyruvate formate-lyase (EC 2.3.1.54) - #1	0	0	0	0	0.0282346	1	1	1	0.972541
Carbohydrates	CO2 fixation	CO2 uptake, carboxysome	probable RuBisCo-expression protein CbbX	0	0	0.220986	0.0525573	0.0282346	1	0.81901	0.950067	0.972541
Carbohydrates	Fermentation	Acetone Butanol Ethanol Synthesis	Acetoacetate decarboxylase (EC 4.1.1.4)	0	0	0	0	0.0305875	1	1	1	0.97032
Carbohydrates	CO2 fixation	Calvin-Benson cycle	NAD(P)-dependent glyceraldehyde 3-phosphate dehydrogenase archaeal (EC 1.2.1.59)	0	0	0	0	0.0305875	1	1	1	0.97032
Carbohydrates	Central carbohydrate metabolism	Glycolysis and Gluconeogenesis, including Archaeal enzymes	NAD(P)-dependent glyceraldehyde 3-phosphate dehydrogenase archaeal (EC 1.2.1.59) - #1	0	0	0	0	0.0305875	1	1	1	0.97032
Carbohydrates	Di- and oligosaccharides	Maltose and Maltodextrin Utilization	Maltose/maltodextrin ABC transporter, substrate binding periplasmic protein MalE	0	0	0	0	0.0329404	1	1	1	0.96811
Carbohydrates	Polysaccharides	Alpha-Amylase locus in Streptocococcus	Maltose/maltodextrin ABC transporter, substrate binding periplasmic protein MalE - #1	0	0	0	0	0.0329404	1	1	1	0.96811
Carbohydrates	One-carbon Metabolism	Serine-glyoxylate cycle	isobutyryl-CoA dehydrogenase	0	0	0.0062691	0.00184412	0.0329404	1	0.99377	0.998159	0.96811
Carbohydrates	Fermentation	Fermentations: Lactate	D-lactate dehydrogenase (EC 1.1.1.28)	0	0	0.0438837	0.0663882	0.0329404	1	0.957961	0.937745	0.96811
Carbohydrates	Fermentation	Fermentations: Mixed acid	D-lactate dehydrogenase (EC 1.1.1.28) - #1	0	0	0.0438837	0.0663882	0.0329404	1	0.957961	0.937745	0.96811
Carbohydrates	Monosaccharides	D-Galacturonate and D-Glucuronate Utilization	Alpha-glucuronidase (EC 3.2.1.139) - #1	0	0	0	0	0.0352933	1	1	1	0.96591
Carbohydrates	Di- and oligosaccharides	Trehalose Biosynthesis	Alpha,alpha-trehalose-phosphate synthase [UDP-forming] (EC 2.4.1.15)	0	0	0	0	0.0352933	1	1	1	0.96591
Carbohydrates	Central carbohydrate metabolism	Pyruvate metabolism II: acetyl-CoA, acetogenesis from pyruvate	Putative membrane protein, clustering with ActP	0	0	0	0	0.0352933	1	1	1	0.96591
Carbohydrates	Carbohydrates	Sugar utilization in Thermotogales	Alpha-glucuronidase (EC 3.2.1.139)	0	0	0	0	0.0352933	1	1	1	0.96591
Carbohydrates	Di- and oligosaccharides	Maltose and Maltodextrin Utilization	Transcriptional regulator of maltose utilization, LacI family	0	0	0	0	0.0423519	1	1	1	0.959369
Carbohydrates	Aminosugars	Chitin and N-acetylglucosamine utilization	Glucosamine-6-phosphate deaminase [isomerizing], alternative (EC 3.5.99.6) - #1	0	0	0	0.0165971	0.0423519	1	1	0.983674	0.959369
Carbohydrates	Carbohydrates	Sugar utilization in Thermotogales	Glucosamine-6-phosphate deaminase [isomerizing], alternative (EC 3.5.99.6)	0	0	0	0.0165971	0.0423519	1	1	0.983674	0.959369
Carbohydrates	Fermentation	Acetone Butanol Ethanol Synthesis	Acetyl-CoA:acetoacetyl-CoA transferase, alpha subunit (EC 2.8.3.8)	0	0	0	0.00276618	0.0470577	1	1	0.997241	0.955057
Carbohydrates	Fermentation	Acetyl-CoA fermentation to Butyrate	Acetyl-CoA:acetoacetyl-CoA transferase, alpha subunit (EC 2.8.3.8) - #1	0	0	0	0.00276618	0.0470577	1	1	0.997241	0.955057
Carbohydrates	Monosaccharides	L-Arabinose utilization	L-arabinose transport ATP-binding protein AraG (TC 3.A.1.2.2)	0	0	0.00156728	0.00461029	0.0470577	1	0.998435	0.995411	0.955057
Carbohydrates	Monosaccharides	Xylose utilization	Alpha-xylosidase (EC 3.2.1.-)	0	0	0.0391819	0.0258176	0.0494106	1	0.962295	0.974832	0.952916
Carbohydrates	Di- and oligosaccharides	Maltose and Maltodextrin Utilization	Maltose phosphorylase (EC 2.4.1.8)	0	0	0.0862001	0.0654661	0.0729395	1	0.920641	0.938556	0.932019
Carbohydrates	Di- and oligosaccharides	Trehalose Uptake and Utilization	Trehalose phosphorylase (EC 2.4.1.64) - #1	0	0	0.0862001	0.0654661	0.0729395	1	0.920641	0.938556	0.932019
Carbohydrates	Di- and oligosaccharides	Trehalose Biosynthesis	Trehalose phosphorylase (EC 2.4.1.64)	0	0	0.0862001	0.0654661	0.0729395	1	0.920641	0.938556	0.932019
Carbohydrates	Carbohydrates	VC0266	Hypothetical protein VC0266 (sugar utilization related?)	0	0	0.0062691	0	0.0799981	1	0.99377	1	0.925928
Carbohydrates	Sugar alcohols	Mannitol Utilization	Fructokinase (EC 2.7.1.4) - #4	0	0	0	0	0.101174	1	1	1	0.908122
Carbohydrates	Di- and oligosaccharides	Sucrose utilization	Fructokinase (EC 2.7.1.4) - #1	0	0	0	0	0.101174	1	1	1	0.908122
Carbohydrates	Monosaccharides	Fructose utilization	Fructokinase (EC 2.7.1.4) - #3	0	0	0	0	0.101174	1	1	1	0.908122
Carbohydrates	Di- and oligosaccharides	Sucrose utilization Shewanella	Fructokinase (EC 2.7.1.4) - #2	0	0	0	0	0.101174	1	1	1	0.908122
Carbohydrates	Carbohydrates	Sugar utilization in Thermotogales	Fructokinase (EC 2.7.1.4)	0	0	0	0	0.101174	1	1	1	0.908122
Carbohydrates	Sugar alcohols	Glycerol and Glycerol-3-phosphate Uptake and Utilization	Aerobic glycerol-3-phosphate dehydrogenase (EC 1.1.5.3)	0	0	0	0.063622	0.10588	1	1	0.940184	0.904257
Carbohydrates	Organic acids	Propionate-CoA to Succinate Module	2-methylcitrate dehydratase FeS dependent (EC 4.2.1.79) - #1	0	0	0.0266437	0.0414926	0.12235	1	0.974048	0.96016	0.890988
Carbohydrates	Organic acids	Methylcitrate cycle	2-methylcitrate dehydratase FeS dependent (EC 4.2.1.79)	0	0	0.0266437	0.0414926	0.12235	1	0.974048	0.96016	0.890988
Carbohydrates	Organic acids	Isobutyryl-CoA to Propionyl-CoA Module	3-hydroxyisobutyryl-CoA hydrolase (EC 3.1.2.4) - #2	0	0	0	0	0.127056	1	1	1	0.887267
Carbohydrates	Di- and oligosaccharides	Trehalose Biosynthesis	Glucoamylase (EC 3.2.1.3) - #1	0	0	0	0	0.127056	1	1	1	0.887267
Carbohydrates	Di- and oligosaccharides	Maltose and Maltodextrin Utilization	Glucoamylase (EC 3.2.1.3)	0	0	0	0	0.127056	1	1	1	0.887267
Carbohydrates	Fermentation	Fermentations: Mixed acid	Phosphate acetyltransferase (EC 2.3.1.8) - #3	0	0	0.0579892	0.0746867	0.145879	1	0.945189	0.930504	0.872693
Carbohydrates	Fermentation	Fermentations: Lactate	Phosphate acetyltransferase (EC 2.3.1.8) - #2	0	0	0.0579892	0.0746867	0.145879	1	0.945189	0.930504	0.872693
Carbohydrates	Central carbohydrate metabolism	Pyruvate metabolism II: acetyl-CoA, acetogenesis from pyruvate	Phosphate acetyltransferase (EC 2.3.1.8) - #1	0	0	0.0579892	0.0746867	0.145879	1	0.945189	0.930504	0.872693
Carbohydrates	Sugar alcohols	Ethanolamine utilization	Phosphate acetyltransferase (EC 2.3.1.8) - #4	0	0	0.0579892	0.0746867	0.145879	1	0.945189	0.930504	0.872693
Carbohydrates	Sugar alcohols	Propanediol utilization	Phosphate acetyltransferase (EC 2.3.1.8) - #5	0	0	0.0579892	0.0746867	0.145879	1	0.945189	0.930504	0.872693
Carbohydrates	Carbohydrates	Sugar utilization in Thermotogales	Beta-xylosidase (EC 3.2.1.37)	0	0	0.062691	0.0848294	0.15529	1	0.941007	0.921804	0.865583
Carbohydrates	Monosaccharides	Xylose utilization	Beta-xylosidase (EC 3.2.1.37) - #1	0	0	0.062691	0.0848294	0.15529	1	0.941007	0.921804	0.865583
Carbohydrates	Carbohydrates	Sugar utilization in Thermotogales	Alpha-N-arabinofuranosidase (EC 3.2.1.55)	0	0	0.0141055	0	0.157643	1	0.986091	1	0.863824
Carbohydrates	Monosaccharides	L-Arabinose utilization	Alpha-N-arabinofuranosidase (EC 3.2.1.55) - #1	0	0	0.0141055	0	0.157643	1	0.986091	1	0.863824
Carbohydrates	Organic acids	Methylcitrate cycle	2-methylcitrate dehydratase (EC 4.2.1.79)	0.0710494	0.070943	0.0673928	0.0507132	0.0705866	1.0001	1.00343	1.01935	1.00043
Carbohydrates	Organic acids	Propionate-CoA to Succinate Module	2-methylcitrate dehydratase (EC 4.2.1.79) - #1	0.0710494	0.070943	0.0673928	0.0507132	0.0705866	1.0001	1.00343	1.01935	1.00043
Carbohydrates	Fermentation	Acetyl-CoA fermentation to Butyrate	3-hydroxybutyryl-CoA epimerase (EC 5.1.2.3)	0.42351	0.422964	0.40279	0.260943	0.374109	1.00038	1.01477	1.12893	1.03595
Carbohydrates	Sugar alcohols	Ethanolamine utilization	Acetaldehyde dehydrogenase, ethanolamine utilization cluster	0.00139313	0.000898013	0	0.00276618	0	1.00049	1.00139	0.998631	1.00139
Carbohydrates	One-carbon Metabolism	Serine-glyoxylate cycle	Fumarate hydratase class I, anaerobic (EC 4.2.1.2)	0.0195038	0.0188583	0.00940365	0.00645441	0.00470577	1.00063	1.01001	1.01297	1.01473
Carbohydrates	Fermentation	Acetyl-CoA fermentation to Butyrate	3-hydroxybutyryl-CoA dehydrogenase (EC 1.1.1.157) - #1	0.130954	0.130212	0.0877674	0.119868	0.223524	1.00066	1.0397	1.0099	0.924341
Carbohydrates	Fermentation	Butanol Biosynthesis	3-hydroxybutyryl-CoA dehydrogenase (EC 1.1.1.157) - #2	0.130954	0.130212	0.0877674	0.119868	0.223524	1.00066	1.0397	1.0099	0.924341
Carbohydrates	Fermentation	Acetone Butanol Ethanol Synthesis	3-hydroxybutyryl-CoA dehydrogenase (EC 1.1.1.157)	0.130954	0.130212	0.0877674	0.119868	0.223524	1.00066	1.0397	1.0099	0.924341
Carbohydrates	Monosaccharides	L-fucose utilization	dehydrogenase clustered with L-fuconate utilization genes	0.00696563	0.00628609	0.01724	0.0202853	0.00470577	1.00068	0.9899	0.986945	1.00225
Carbohydrates	Monosaccharides	L-fucose utilization temp	dehydrogenase clustered with L-fuconate utilization genes - #1	0.00696563	0.00628609	0.01724	0.0202853	0.00470577	1.00068	0.9899	0.986945	1.00225
Carbohydrates	Central carbohydrate metabolism	Methylglyoxal Metabolism	Methylglyoxal synthase (EC 4.2.3.3)	0.0585113	0.0574728	0.0485855	0.0488691	0.00705866	1.00098	1.00947	1.00919	1.05109
Carbohydrates	Monosaccharides	D-Galacturonate and D-Glucuronate Utilization	Hexuronate utilization operon transcriptional repressor ExuR	0.00557251	0.00449006	0.0109709	0	0	1.00108	0.99466	1.00557	1.00557
Carbohydrates	Glycoside hydrolases	Predicted carbohydrate hydrolases	COG2152 predicted glycoside hydrolase	0.00835876	0.0071841	0.01724	0.158594	0.152938	1.00117	0.991269	0.87033	0.8746
Carbohydrates	Monosaccharides	Mannose Metabolism	Mannose-1-phosphate guanylyltransferase (GDP) (EC 2.7.7.22)	0.0794082	0.0781271	0.261735	0.189022	0.385873	1.00119	0.855495	0.907812	0.778865
Carbohydrates	Monosaccharides	D-galactarate, D-glucarate and D-glycerate catabolism	Predicted 5-dehydro-4-deoxyglucarate regulator YcbG	0.00139313	0	0	0	0	1.00139	1.00139	1.00139	1.00139
Carbohydrates	Fermentation	Acetone Butanol Ethanol Synthesis	Acetoacetate metabolism regulatory protein AtoC	0.00139313	0	0	0.0184412	0.0117644	1.00139	1.00139	0.983261	0.989749
Carbohydrates	Fermentation	Acetyl-CoA fermentation to Butyrate	Acetoacetate metabolism regulatory protein AtoC - #1	0.00139313	0	0	0.0184412	0.0117644	1.00139	1.00139	0.983261	0.989749
Carbohydrates	Sugar alcohols	Inositol catabolism	uncharacterized domain	0.00139313	0	0.00783638	0	0.0164702	1.00139	0.993607	1.00139	0.985167
Carbohydrates	Monosaccharides	Xylose utilization	D-xylose proton-symporter XylE	0.00139313	0	0.0109709	0.0129088	0.0988212	1.00139	0.990526	0.988631	0.911334
Carbohydrates	Monosaccharides	Mannose Metabolism	Predicted sodium-dependent mannose transporter	0.00417938	0.00269404	0	0.00276618	0	1.00148	1.00418	1.00141	1.00418
Carbohydrates	CO2 fixation	Calvin-Benson cycle	Sedoheptulose-1,7-bisphosphatase (EC 3.1.3.37)	0.00417938	0.00269404	0	0.00645441	0	1.00148	1.00418	0.99774	1.00418
Carbohydrates	Central carbohydrate metabolism	Pyruvate Alanine Serine Interconversions	D-alanine aminotransferase (EC 2.6.1.21)	0.0153244	0.0134702	0.0109709	0.0175191	0	1.00183	1.00431	0.997843	1.01532
Carbohydrates	CO2 fixation	CO2 uptake, carboxysome	Rubisco activation protein CbbQ	0.00278625	0.000898013	0	0.00368823	0.0117644	1.00189	1.00279	0.999101	0.991126
Carbohydrates	Di- and oligosaccharides	Maltose and Maltodextrin Utilization	Glycogen phosphorylase (EC 2.4.1.1)	0.115629	0.11315	0.180237	0.226826	0.374109	1.00223	0.945259	0.909362	0.811893
Carbohydrates	Polysaccharides	Glycogen metabolism	Glycogen phosphorylase (EC 2.4.1.1) - #1	0.115629	0.11315	0.180237	0.226826	0.374109	1.00223	0.945259	0.909362	0.811893
Carbohydrates	Monosaccharides	L-fucose utilization	Possible fucose ABC transporter, permease component	0.0278625	0.0251444	0.0203746	0.015675	0	1.00265	1.00734	1.012	1.02786
Carbohydrates	Organic acids	Tricarballylate Utilization	TcuB: works with TcuA to oxidize tricarballylate to cis-aconitate	0.0153244	0.0125722	0.0203746	0.0442588	0.0658808	1.00272	0.995051	0.972292	0.952568
Carbohydrates	Sugar alcohols	Glycerol fermenation to 1,3-propanediol	1,3-propanediol dehydrogenase (EC 1.1.1.202)	0.00278625	0	0	0	0	1.00279	1.00279	1.00279	1.00279
Carbohydrates	Monosaccharides	D-galactarate, D-glucarate and D-glycerate catabolism	D-glucarate permease	0.00278625	0	0	0	0	1.00279	1.00279	1.00279	1.00279
Carbohydrates	Monosaccharides	L-Arabinose utilization	Transcriptional regulator of the arabinose operon in Shewanella, GntR family	0.00278625	0	0	0	0	1.00279	1.00279	1.00279	1.00279
Carbohydrates	Di- and oligosaccharides	Fructooligosaccharides(FOS) and Raffinose Utilization	Hyaluronoglucosaminidase (EC 3.2.1.35)	0.00278625	0	0	0	0	1.00279	1.00279	1.00279	1.00279
Carbohydrates	Organic acids	Malonate decarboxylase	Malonate decarboxylase alpha subunit	0.00278625	0	0	0	0	1.00279	1.00279	1.00279	1.00279
Carbohydrates	Central carbohydrate metabolism	Methylglyoxal Metabolism	NADPH-dependent methylglyoxal reductase (D-lactaldehyde dehydrogenase)	0.00278625	0	0	0	0	1.00279	1.00279	1.00279	1.00279
Carbohydrates	Monosaccharides	D-ribose utilization	Predicted nucleoside ABC transporter, substrate-binding component	0.00278625	0	0	0	0	1.00279	1.00279	1.00279	1.00279
Carbohydrates	Monosaccharides	Deoxyribose and Deoxynucleoside Catabolism	Predicted nucleoside ABC transporter, substrate-binding component - #1	0.00278625	0	0	0	0	1.00279	1.00279	1.00279	1.00279
Carbohydrates	Monosaccharides	D-galactarate, D-glucarate and D-glycerate catabolism	D-galactarate permease	0.00278625	0	0	0	0	1.00279	1.00279	1.00279	1.00279
Carbohydrates	Monosaccharides	Xylose utilization	Xylose activator XylR (AraC family)	0.00278625	0	0	0	0	1.00279	1.00279	1.00279	1.00279
Carbohydrates	Organic acids	Propionyl-CoA to Succinyl-CoA Module	Methylmalonyl-CoA decarboxylase, beta chain (EC 4.1.1.41)	0.00278625	0	0	0	0	1.00279	1.00279	1.00279	1.00279
Carbohydrates	CO2 fixation	CO2 uptake, carboxysome	putative carboxysome peptide A	0.00278625	0	0	0	0	1.00279	1.00279	1.00279	1.00279
Carbohydrates	Central carbohydrate metabolism	Dihydroxyacetone kinases	Phosphoenolpyruvate-dihydroxyacetone phosphotransferase (EC 2.7.1.121), dihydroxyacetone binding subunit DhaK	0.00278625	0	0.00783638	0.0221294	0	1.00279	0.994989	0.981076	1.00279
Carbohydrates	Central carbohydrate metabolism	Pyruvate metabolism II: acetyl-CoA, acetogenesis from pyruvate	Pyruvate decarboxylase (EC 4.1.1.1)	0.00278625	0	0.106575	0.0700764	0	1.00279	0.906207	0.937116	1.00279
Carbohydrates	Monosaccharides	L-fucose utilization	L-fucose isomerase (EC 5.3.1.25)	0.00278625	0	0	0.0129088	0.0494106	1.00279	1.00279	0.990006	0.955571
Carbohydrates	Monosaccharides	Xylose utilization	Xylonate dehydratase (EC 4.2.1.82)	0.00278625	0	0.00313455	0.0138309	0.10588	1.00279	0.999653	0.989106	0.906777
Carbohydrates	Aminosugars	Chitin and N-acetylglucosamine utilization	N-Acetyl-D-glucosamine ABC transport system ATP-binding protein	0.00557251	0.00269404	0	0.00184412	0	1.00287	1.00557	1.00372	1.00557
Carbohydrates	Carbohydrates	Sugar utilization in Thermotogales	Ribose 5-phosphate isomerase B (EC 5.3.1.6)	0.136526	0.132906	0.147324	0.118023	0.0988212	1.0032	0.990589	1.01655	1.03431
Carbohydrates	CO2 fixation	Calvin-Benson cycle	Ribose 5-phosphate isomerase B (EC 5.3.1.6) - #1	0.136526	0.132906	0.147324	0.118023	0.0988212	1.0032	0.990589	1.01655	1.03431
Carbohydrates	Central carbohydrate metabolism	Pentose phosphate pathway	Ribose 5-phosphate isomerase B (EC 5.3.1.6) - #2	0.136526	0.132906	0.147324	0.118023	0.0988212	1.0032	0.990589	1.01655	1.03431
Carbohydrates	Monosaccharides	D-ribose utilization	Ribose 5-phosphate isomerase B (EC 5.3.1.6) - #3	0.136526	0.132906	0.147324	0.118023	0.0988212	1.0032	0.990589	1.01655	1.03431
Carbohydrates	Fermentation	Acetone Butanol Ethanol Synthesis	Electron transfer flavoprotein, alpha subunit - #2	0.185286	0.181399	0.0987383	0.19271	0.181172	1.00329	1.07877	0.993775	1.00348
Carbohydrates	Fermentation	Acetyl-CoA fermentation to Butyrate	Electron transfer flavoprotein, alpha subunit - #3	0.185286	0.181399	0.0987383	0.19271	0.181172	1.00329	1.07877	0.993775	1.00348
Carbohydrates	Carbohydrates	Sugar utilization in Thermotogales	Glucokinase (EC 2.7.1.2)	0.0195038	0.0152662	0.028211	0.115257	0	1.00417	0.991532	0.914142	1.0195
Carbohydrates	Central carbohydrate metabolism	Glycolysis and Gluconeogenesis	Glucokinase (EC 2.7.1.2) - #2	0.0195038	0.0152662	0.028211	0.115257	0	1.00417	0.991532	0.914142	1.0195
Carbohydrates	Central carbohydrate metabolism	Peripheral Glucose Catabolism Pathways	Glucokinase (EC 2.7.1.2) - #3	0.0195038	0.0152662	0.028211	0.115257	0	1.00417	0.991532	0.914142	1.0195
Carbohydrates	Central carbohydrate metabolism	Entner-Doudoroff Pathway	Glucokinase (EC 2.7.1.2) - #1	0.0195038	0.0152662	0.028211	0.115257	0	1.00417	0.991532	0.914142	1.0195
Carbohydrates	Central carbohydrate metabolism	Entner-Doudoroff Pathway	OpcA, an allosteric effector of glucose-6-phosphate dehydrogenase, actinobacterial	0.00417938	0	0	0	0	1.00418	1.00418	1.00418	1.00418
Carbohydrates	Organic acids	Malonate decarboxylase	Malonate decarboxylase delta subunit	0.00417938	0	0	0	0	1.00418	1.00418	1.00418	1.00418
Carbohydrates	Sugar alcohols	Mannitol Utilization	PTS system, mannitol-specific IIA component (EC 2.7.1.69)	0.00417938	0	0	0	0	1.00418	1.00418	1.00418	1.00418
Carbohydrates	Di- and oligosaccharides	Maltose and Maltodextrin Utilization	Cytoplasmic alpha-amylase (EC 3.2.1.1)	0.00417938	0	0	0	0	1.00418	1.00418	1.00418	1.00418
Carbohydrates	Monosaccharides	D-allose utilization	D-allose ABC transporter, substrate-binding component	0.00417938	0	0	0	0	1.00418	1.00418	1.00418	1.00418
Carbohydrates	Di- and oligosaccharides	Maltose and Maltodextrin Utilization	Inner membrane ABC transporter permease protein YcjO	0.00417938	0	0	0	0	1.00418	1.00418	1.00418	1.00418
Carbohydrates	Fermentation	Acetoin, butanediol metabolism	Transcriptional activator of acetoin dehydrogenase operon AcoR	0.00417938	0	0.0203746	0	0	1.00418	0.984128	1.00418	1.00418
Carbohydrates	Sugar alcohols	Propanediol utilization	Propanediol utilization polyhedral body protein PduA	0.00417938	0	0	0.00184412	0	1.00418	1.00418	1.00233	1.00418
Carbohydrates	Monosaccharides	D-Galacturonate and D-Glucuronate Utilization	Uronate isomerase, family BH0493 (EC 5.3.1.12)	0.00417938	0	0.0062691	0.0129088	0	1.00418	0.997923	0.991382	1.00418
Carbohydrates	Monosaccharides	Fructose utilization	Transcriptional regulator FrcR for fructose utilization, ROK family	0.00417938	0	0	0	0.00470577	1.00418	1.00418	1.00418	0.999476
Carbohydrates	Monosaccharides	Xylose utilization	D-xylose-specific 1-epimerase (mutarotase)	0.00417938	0	0	0	0.00705866	1.00418	1.00418	1.00418	0.997141
Carbohydrates	CO2 fixation	CO2 uptake, carboxysome	Ribulose bisphosphate carboxylase small chain (EC 4.1.1.39)	0.00975188	0.00538808	0.0407492	0.0248956	0.00470577	1.00434	0.970216	0.985224	1.00502
Carbohydrates	CO2 fixation	Photorespiration (oxidative C2 cycle)	Ribulose bisphosphate carboxylase small chain (EC 4.1.1.39) - #3	0.00975188	0.00538808	0.0407492	0.0248956	0.00470577	1.00434	0.970216	0.985224	1.00502
Carbohydrates	CO2 fixation	Carboxysome	Ribulose bisphosphate carboxylase small chain (EC 4.1.1.39) - #2	0.00975188	0.00538808	0.0407492	0.0248956	0.00470577	1.00434	0.970216	0.985224	1.00502
Carbohydrates	CO2 fixation	Calvin-Benson cycle	Ribulose bisphosphate carboxylase small chain (EC 4.1.1.39) - #1	0.00975188	0.00538808	0.0407492	0.0248956	0.00470577	1.00434	0.970216	0.985224	1.00502
Carbohydrates	Aminosugars	(GlcNAc)2 Catabolic Operon	GlcNAc phosphomutase (EC 5.4.2.3)	0.0125381	0.0071841	0	0	0	1.00532	1.01254	1.01254	1.01254
Carbohydrates	Di- and oligosaccharides	Fructooligosaccharides(FOS) and Raffinose Utilization	Alpha-mannosidase (EC 3.2.1.24) - #1	0.0153244	0.00987814	0	0.00461029	0	1.00539	1.01532	1.01066	1.01532
Carbohydrates	Monosaccharides	Mannose Metabolism	Alpha-mannosidase (EC 3.2.1.24) - #2	0.0153244	0.00987814	0	0.00461029	0	1.00539	1.01532	1.01066	1.01532
Carbohydrates	Carbohydrates	Sugar utilization in Thermotogales	Alpha-mannosidase (EC 3.2.1.24)	0.0153244	0.00987814	0	0.00461029	0	1.00539	1.01532	1.01066	1.01532
Carbohydrates	Central carbohydrate metabolism	TCA Cycle	Succinate dehydrogenase flavoprotein subunit (EC 1.3.99.1)	0.867918	0.857602	0.80558	0.804957	0.724689	1.00555	1.03453	1.03488	1.08305
Carbohydrates	One-carbon Metabolism	Serine-glyoxylate cycle	Succinate dehydrogenase flavoprotein subunit (EC 1.3.99.1) - #1	0.867918	0.857602	0.80558	0.804957	0.724689	1.00555	1.03453	1.03488	1.08305
Carbohydrates	Organic acids	Malonate decarboxylase	Malonate transporter, MadL subunit	0.00557251	0	0	0	0	1.00557	1.00557	1.00557	1.00557
Carbohydrates	Monosaccharides	D-Tagatose and Galactitol Utilization	Galactitol-1-phosphate 5-dehydrogenase (EC 1.1.1.251)	0.00557251	0	0	0	0	1.00557	1.00557	1.00557	1.00557
Carbohydrates	Central carbohydrate metabolism	Pyruvate metabolism II: acetyl-CoA, acetogenesis from pyruvate	Acylphosphate phosphohydrolase (EC 3.6.1.7), putative	0.00557251	0	0	0	0	1.00557	1.00557	1.00557	1.00557
Carbohydrates	Monosaccharides	L-rhamnose utilization	rhamnogalacturonan acetylesterase	0.00557251	0	0	0	0	1.00557	1.00557	1.00557	1.00557
Carbohydrates	Monosaccharides	L-fucose utilization	L-fucose mutarotase	0.00835876	0.00269404	0.0125382	0.0129088	0	1.00565	0.995872	0.995508	1.00836
Carbohydrates	Monosaccharides	L-fucose utilization temp	Possible alternative L-fucose mutarotase - #1	0.00835876	0.00269404	0.0125382	0.0129088	0	1.00565	0.995872	0.995508	1.00836
Carbohydrates	Monosaccharides	L-fucose utilization	Possible alternative L-fucose mutarotase	0.00835876	0.00269404	0.0125382	0.0129088	0	1.00565	0.995872	0.995508	1.00836
Carbohydrates	Organic acids	Malonate decarboxylase	Malonate transporter, MadM subunit	0.0529388	0.0466967	0.00783638	0.0129088	0.0117644	1.00596	1.04475	1.03952	1.0407
Carbohydrates	Organic acids	2-methylcitrate to 2-methylaconitate metabolism cluster	2-methylaconitate racemase	0.0278625	0.0215523	0.0062691	0.00461029	0	1.00618	1.02146	1.02315	1.02786
Carbohydrates	One-carbon Metabolism	Serine-glyoxylate cycle	Succinyl-CoA:3-ketoacid-coenzyme A transferase subunit A (EC 2.8.3.5) - #2	0.0459732	0.0395126	0.0611237	0.0663882	0.0917625	1.00622	0.985722	0.980856	0.958059
Carbohydrates	Organic acids	Propionyl-CoA to Succinyl-CoA Module	Propionyl-CoA carboxylase biotin-containing subunit (EC 6.4.1.3)	0.0794082	0.072739	0.0485855	0.118946	0.0988212	1.00622	1.02939	0.964666	0.982333
Carbohydrates	Central carbohydrate metabolism	Glycolysis and Gluconeogenesis	Pyrophosphate--fructose 6-phosphate 1-phosphotransferase, alpha subunit (EC 2.7.1.90)	0.00835876	0.00179603	0.0391819	0.0433367	0	1.00655	0.970339	0.966475	1.00836
Carbohydrates	Central carbohydrate metabolism	Glycolysis and Gluconeogenesis, including Archaeal enzymes	Pyrophosphate--fructose 6-phosphate 1-phosphotransferase, alpha subunit (EC 2.7.1.90) - #1	0.00835876	0.00179603	0.0391819	0.0433367	0	1.00655	0.970339	0.966475	1.00836
Carbohydrates	Monosaccharides	D-gluconate and ketogluconates metabolism	2-ketoaldonate reductase, broad specificity (EC 1.1.1.215) (EC 1.1.1.-)	0.0264694	0.0197563	0.01724	0.0488691	0.0564693	1.00658	1.00907	0.978644	0.971604
Carbohydrates	Monosaccharides	L-fucose utilization	L-fuculose phosphate aldolase (EC 4.1.2.17)	0.00696563	0	0	0	0	1.00697	1.00697	1.00697	1.00697
Carbohydrates	CO2 fixation	CO2 uptake, carboxysome	RuBisCO operon transcriptional regulator	0.00696563	0	0.167698	0.0285838	0	1.00697	0.862351	0.978983	1.00697
Carbohydrates	One-carbon Metabolism	One-carbon metabolism by tetrahydropterines	Methylene tetrahydromethanopterin dehydrogenase (EC 1.5.99.9)	0.00696563	0	0.00313455	0.00368823	0.00941154	1.00697	1.00382	1.00327	0.997577
Carbohydrates	One-carbon Metabolism	Serine-glyoxylate cycle	Methylene tetrahydromethanopterin dehydrogenase (EC 1.5.99.9) - #1	0.00696563	0	0.00313455	0.00368823	0.00941154	1.00697	1.00382	1.00327	0.997577
Carbohydrates	Di- and oligosaccharides	Trehalose Biosynthesis	Trehalose synthase (EC 5.4.99.16)	0.00696563	0	0	0.0663882	0.0423519	1.00697	1.00697	0.944277	0.966051
Carbohydrates	Sugar alcohols	Ethanolamine utilization	Ethanolamine ammonia-lyase heavy chain (EC 4.3.1.7)	0.00696563	0	0.0266437	0.102348	0.112939	1.00697	0.980833	0.913473	0.904781
Carbohydrates	One-carbon Metabolism	Serine-glyoxylate cycle	low-specificity D-threonine aldolase - #1	0.0278625	0.0206543	0.00783638	0.015675	0.0752923	1.00706	1.01987	1.012	0.955891
Carbohydrates	Monosaccharides	Mannose Metabolism	Mannose-1-phosphate guanylyltransferase (EC 2.7.7.13 )	0.0153244	0.00808211	0.0814983	0	0.00705866	1.00718	0.938813	1.01532	1.00821
Carbohydrates	CO2 fixation	Calvin-Benson cycle	Phosphoribulokinase (EC 2.7.1.19)	0.0153244	0.00808211	0.0250764	0.0212073	0.0164702	1.00718	0.990487	0.994239	0.998873
Carbohydrates	Carbohydrates	Sugar utilization in Thermotogales	L-ribulose-5-phosphate 4-epimerase (EC 5.1.3.4)	0.0181106	0.0107762	0	0.0544014	0	1.00726	1.01811	0.965582	1.01811
Carbohydrates	Monosaccharides	L-ascorbate utilization (and related gene clusters)	L-ribulose-5-phosphate 4-epimerase (EC 5.1.3.4) - #2	0.0181106	0.0107762	0	0.0544014	0	1.00726	1.01811	0.965582	1.01811
Carbohydrates	Monosaccharides	L-Arabinose utilization	L-ribulose-5-phosphate 4-epimerase (EC 5.1.3.4) - #1	0.0181106	0.0107762	0	0.0544014	0	1.00726	1.01811	0.965582	1.01811
Carbohydrates	Carbohydrates	Sugar utilization in Thermotogales	Predicted beta-glucoside-regulated ABC transport system, permease component 1, COG1175	0.0208969	0.0134702	0	0	0	1.00733	1.0209	1.0209	1.0209
Carbohydrates	Di- and oligosaccharides	Beta-Glucoside Metabolism	Predicted beta-glucoside-regulated ABC transport system, permease component 1, COG1175 - #1	0.0208969	0.0134702	0	0	0	1.00733	1.0209	1.0209	1.0209
Carbohydrates	One-carbon Metabolism	Serine-glyoxylate cycle	Succinyl-CoA:3-ketoacid-coenzyme A transferase subunit B (EC 2.8.3.5) - #2	0.0236831	0.0161642	0.0595565	0.147529	0.143526	1.0074	0.966143	0.892076	0.895199
Carbohydrates	Organic acids	Propionyl-CoA to Succinyl-CoA Module	Methylmalonyl-CoA decarboxylase, alpha chain (EC 4.1.1.41)	0.0139313	0.00628609	0	0	0.0117644	1.0076	1.01393	1.01393	1.00214
Carbohydrates	Aminosugars	Chitin and N-acetylglucosamine utilization	hypothetical oxidoreductase related to N-acetylglucosamine utilization	0.0167175	0.00898013	0.0062691	0.00184412	0	1.00767	1.01038	1.01485	1.01672
Carbohydrates	Central carbohydrate metabolism	Glycolate, glyoxylate interconversions	Glyoxylate reductase (EC 1.1.1.26)	0.0543319	0.0457986	0	0.0691544	0.178819	1.00816	1.05433	0.986136	0.894397
Carbohydrates	CO2 fixation	CO2 uptake, carboxysome	carboxysome shell protein CsoS1	0.00835876	0	0	0	0	1.00836	1.00836	1.00836	1.00836
Carbohydrates	Fermentation	Acetyl-CoA fermentation to Butyrate	Probable electron transfer flavoprotein-quinone oxidoreductase FixC (EC 1.5.5.-)	0.00835876	0	0	0	0	1.00836	1.00836	1.00836	1.00836
Carbohydrates	Monosaccharides	D-Sorbitol(D-Glucitol) and L-Sorbose Utilization	L-sorbose 1-phosphate reductase (EC 1.1.1.-)	0.00835876	0	0	0	0	1.00836	1.00836	1.00836	1.00836
Carbohydrates	CO2 fixation	Calvin-Benson cycle	Fructose-1,6-bisphosphatase, Bacillus type (EC 3.1.3.11)	0.00835876	0	0	0	0.00941154	1.00836	1.00836	1.00836	0.998957
Carbohydrates	Central carbohydrate metabolism	Glycolysis and Gluconeogenesis	Fructose-1,6-bisphosphatase, Bacillus type (EC 3.1.3.11) - #1	0.00835876	0	0	0	0.00941154	1.00836	1.00836	1.00836	0.998957
Carbohydrates	Central carbohydrate metabolism	Glycolysis and Gluconeogenesis, including Archaeal enzymes	Phosphoglycerate mutase (EC 5.4.2.1) - #2	0.238225	0.226299	0.261735	0.202853	0.239994	1.00972	0.981367	1.02941	0.998573
Carbohydrates	Central carbohydrate metabolism	Glycolysis and Gluconeogenesis	Phosphoglycerate mutase (EC 5.4.2.1) - #1	0.238225	0.226299	0.261735	0.202853	0.239994	1.00972	0.981367	1.02941	0.998573
Carbohydrates	Central carbohydrate metabolism	Entner-Doudoroff Pathway	Phosphoglycerate mutase (EC 5.4.2.1)	0.238225	0.226299	0.261735	0.202853	0.239994	1.00972	0.981367	1.02941	0.998573
Carbohydrates	Central carbohydrate metabolism	Pyruvate Alanine Serine Interconversions	L-alanine:glyoxylate aminotransferase (EC 2.6.1.44) - #1	0.00975188	0	0.0125382	0.0304279	0	1.00975	0.997248	0.979935	1.00975
Carbohydrates	CO2 fixation	Photorespiration (oxidative C2 cycle)	L-alanine:glyoxylate aminotransferase (EC 2.6.1.44)	0.00975188	0	0.0125382	0.0304279	0	1.00975	0.997248	0.979935	1.00975
Carbohydrates	One-carbon Metabolism	Serine-glyoxylate cycle	Methylcrotonyl-CoA carboxylase carboxyl transferase subunit (EC 6.4.1.4) - #3	0.0780151	0.067351	0.0752292	0.153984	0.216465	1.00999	1.00259	0.934168	0.886186
Carbohydrates	Central carbohydrate metabolism	Glycolate, glyoxylate interconversions	Glyoxylate reductase (EC 1.1.1.79)	0.0417938	0.0314304	0.0344801	0.0534794	0.108233	1.01005	1.00707	0.988908	0.94005
Carbohydrates	CO2 fixation	Photorespiration (oxidative C2 cycle)	Glycolate dehydrogenase (EC 1.1.99.14), subunit GlcD	0.110057	0.0978834	0.122247	0.141997	0.214113	1.01109	0.989137	0.972031	0.914295
Carbohydrates	Central carbohydrate metabolism	Glycolate, glyoxylate interconversions	Glycolate dehydrogenase (EC 1.1.99.14), subunit GlcD - #1	0.110057	0.0978834	0.122247	0.141997	0.214113	1.01109	0.989137	0.972031	0.914295
Carbohydrates	Fermentation	Fermentations: Lactate	L-lactate dehydrogenase (EC 1.1.1.27)	0.011145	0	0	0	0	1.01115	1.01115	1.01115	1.01115
Carbohydrates	Fermentation	Fermentations: Mixed acid	L-lactate dehydrogenase (EC 1.1.1.27) - #1	0.011145	0	0	0	0	1.01115	1.01115	1.01115	1.01115
Carbohydrates	Monosaccharides	D-Sorbitol(D-Glucitol) and L-Sorbose Utilization	Putative transcriptional regulator of sorbose uptake and utilization genes	0.011145	0	0	0	0	1.01115	1.01115	1.01115	1.01115
Carbohydrates	Sugar alcohols	Inositol catabolism	Inositol transport system permease protein	0.011145	0	0.00783638	0	0.0141173	1.01115	1.00328	1.01115	0.997069
Carbohydrates	Sugar alcohols	Inositol catabolism	Inositol oxygenase (EC 1.13.99.1)	0.0167175	0.00538808	0.0109709	0.0129088	0.00705866	1.01127	1.00568	1.00376	1.00959
Carbohydrates	Central carbohydrate metabolism	Glycolate, glyoxylate interconversions	Transcriptional regulator, LysR family, in glycolate utilization operon	0.0125381	0.000898013	0.00156728	0.00553235	0	1.01163	1.01095	1.00697	1.01254
Carbohydrates	Di- and oligosaccharides	Maltose and Maltodextrin Utilization	Alpha-glucosidase (EC 3.2.1.20)	0.117023	0.104169	0.13792	0.0875955	0.0752923	1.01164	0.981635	1.02706	1.03881
Carbohydrates	Monosaccharides	D-Galacturonate and D-Glucuronate Utilization	Alpha-glucosidase (EC 3.2.1.20) - #1	0.117023	0.104169	0.13792	0.0875955	0.0752923	1.01164	0.981635	1.02706	1.03881
Carbohydrates	Central carbohydrate metabolism	Pyruvate metabolism I: anaplerotic reactions, PEP	D-malic enzyme (EC 1.1.1.83)	0.122595	0.109558	0.0987383	0.110647	0.136467	1.01175	1.02171	1.01076	0.987794
Carbohydrates	Organic acids	Glycerate metabolism	Tartrate decarboxylase (EC 4.1.1.73)	0.122595	0.109558	0.0987383	0.110647	0.136467	1.01175	1.02171	1.01076	0.987794
Carbohydrates	Sugar alcohols	Mannitol Utilization	PTS system, mannitol-specific IIC component (EC 2.7.1.69)	0.0306488	0.0179603	0.0642583	0.00829853	0	1.01246	0.96842	1.02217	1.03065
Carbohydrates	Organic acids	Propionyl-CoA to Succinyl-CoA Module	Methylmalonyl-CoA epimerase (EC 5.1.99.1)	0.0306488	0.0179603	0.0062691	0.0387265	0.0588221	1.01246	1.02423	0.992223	0.973392
Carbohydrates	Aminosugars	Chitin and N-acetylglucosamine utilization	PTS system, N-acetylglucosamine-specific IIA component (EC 2.7.1.69)	0.0125381	0	0	0	0	1.01254	1.01254	1.01254	1.01254
Carbohydrates	One-carbon Metabolism	Serine-glyoxylate cycle	Serine--pyruvate aminotransferase (EC 2.6.1.51)	0.0125381	0	0.0125382	0.0331941	0	1.01254	1	0.980008	1.01254
Carbohydrates	Di- and oligosaccharides	Maltose and Maltodextrin Utilization	Maltose/maltodextrin ABC transporter, permease protein MalG	0.0417938	0.0287364	0.0376146	0.09405	0	1.01269	1.00403	0.952236	1.04179
Carbohydrates	CO2 fixation	Calvin-Benson cycle	Ribose 5-phosphate isomerase A (EC 5.3.1.6)	0.0473663	0.0341245	0.0767965	0.0590117	0.0752923	1.0128	0.972669	0.989003	0.974029
Carbohydrates	Monosaccharides	D-ribose utilization	Ribose 5-phosphate isomerase A (EC 5.3.1.6) - #2	0.0473663	0.0341245	0.0767965	0.0590117	0.0752923	1.0128	0.972669	0.989003	0.974029
Carbohydrates	Central carbohydrate metabolism	Pentose phosphate pathway	Ribose 5-phosphate isomerase A (EC 5.3.1.6) - #1	0.0473663	0.0341245	0.0767965	0.0590117	0.0752923	1.0128	0.972669	0.989003	0.974029
Carbohydrates	Sugar alcohols	Glycerol and Glycerol-3-phosphate Uptake and Utilization	Glycerol-3-phosphate ABC transporter, permease protein UgpE (TC 3.A.1.1.3) - #1	0.0348282	0.0215523	0.01724	0.0553235	0.0305875	1.013	1.01729	0.980579	1.00411
Carbohydrates	Carbohydrates	Sugar utilization in Thermotogales	Glycerol-3-phosphate ABC transporter, permease protein UgpE (TC 3.A.1.1.3)	0.0348282	0.0215523	0.01724	0.0553235	0.0305875	1.013	1.01729	0.980579	1.00411
Carbohydrates	Fermentation	Acetyl-CoA fermentation to Butyrate	3-hydroxyacyl-CoA dehydrogenase (EC 1.1.1.35) - #2	0.554464	0.534318	0.521903	0.589195	0.644691	1.01313	1.0214	0.978146	0.945141
Carbohydrates	Sugar alcohols	Glycerol and Glycerol-3-phosphate Uptake and Utilization	Glycerol kinase (EC 2.7.1.30) - #1	0.355247	0.337653	0.188073	0.368823	0.2447	1.01315	1.14071	0.990082	1.08881
Carbohydrates	Carbohydrates	Sugar utilization in Thermotogales	Glycerol kinase (EC 2.7.1.30)	0.355247	0.337653	0.188073	0.368823	0.2447	1.01315	1.14071	0.990082	1.08881
Carbohydrates	CO2 fixation	CO2 uptake, carboxysome	Low-affinity CO2 hydration protein CphX	0.033435	0.0197563	0.0407492	0.0138309	0	1.01341	0.992972	1.01934	1.03344
Carbohydrates	One-carbon Metabolism	One-carbon metabolism by tetrahydropterines	Formyltetrahydrofolate deformylase (EC 3.5.1.10)	0.112843	0.0978834	0.144189	0.078375	0.174114	1.01363	0.972604	1.03196	0.947816
Carbohydrates	Central carbohydrate metabolism	Glycolate, glyoxylate interconversions	Hydroxypyruvate reductase (EC 1.1.1.81) - #1	0.0640838	0.0493907	0.0611237	0.0903617	0.188231	1.014	1.00279	0.9759	0.895519
Carbohydrates	Organic acids	Glycerate metabolism	Hydroxypyruvate reductase (EC 1.1.1.81) - #2	0.0640838	0.0493907	0.0611237	0.0903617	0.188231	1.014	1.00279	0.9759	0.895519
Carbohydrates	CO2 fixation	Photorespiration (oxidative C2 cycle)	Hydroxypyruvate reductase (EC 1.1.1.81)	0.0640838	0.0493907	0.0611237	0.0903617	0.188231	1.014	1.00279	0.9759	0.895519
Carbohydrates	One-carbon Metabolism	Serine-glyoxylate cycle	Propionyl-CoA carboxylase carboxyl transferase subunit (EC 6.4.1.3)	0.0780151	0.0628609	0.0971711	0.151218	0.13882	1.01426	0.982541	0.936413	0.946607
Carbohydrates	Organic acids	Propionyl-CoA to Succinyl-CoA Module	Propionyl-CoA carboxylase carboxyl transferase subunit (EC 6.4.1.3) - #1	0.0780151	0.0628609	0.0971711	0.151218	0.13882	1.01426	0.982541	0.936413	0.946607
Carbohydrates	Sugar alcohols	Mannitol Utilization	PTS system, mannitol-specific IIB component (EC 2.7.1.69)	0.0181106	0.00359205	0.0642583	0.00829853	0	1.01447	0.956639	1.00973	1.01811
Carbohydrates	CO2 fixation	Photorespiration (oxidative C2 cycle)	Serine--glyoxylate aminotransferase (EC 2.6.1.45)	0.118416	0.102373	0.100306	0.157672	0.157643	1.01455	1.01646	0.96609	0.966114
Carbohydrates	One-carbon Metabolism	Serine-glyoxylate cycle	Serine--glyoxylate aminotransferase (EC 2.6.1.45) - #1	0.118416	0.102373	0.100306	0.157672	0.157643	1.01455	1.01646	0.96609	0.966114
Carbohydrates	Organic acids	Glycerate metabolism	Serine--glyoxylate aminotransferase (EC 2.6.1.45) - #2	0.118416	0.102373	0.100306	0.157672	0.157643	1.01455	1.01646	0.96609	0.966114
Carbohydrates	CO2 fixation	Photorespiration (oxidative C2 cycle)	Glyoxylate carboligase (EC 4.1.1.47)	0.0376144	0.0224503	0.0548546	0.0673103	0.0917625	1.01483	0.983656	0.972177	0.950403
Carbohydrates	Organic acids	Glycerate metabolism	Glyoxylate carboligase (EC 4.1.1.47) - #1	0.0376144	0.0224503	0.0548546	0.0673103	0.0917625	1.01483	0.983656	0.972177	0.950403
Carbohydrates	Fermentation	Acetoin, butanediol metabolism	Acetolactate synthase small subunit (EC 2.2.1.6) - #1	0.136526	0.119436	0.2586	0.121712	0.0870568	1.01527	0.903008	1.01321	1.04551
Carbohydrates	Organic acids	Isobutyryl-CoA to Propionyl-CoA Module	3-ketoacyl-CoA thiolase [isoleucine degradation] (EC 2.3.1.16) - #2	0.0181106	0.00269404	0.00783638	0	0	1.01538	1.01019	1.01811	1.01811
Carbohydrates	Monosaccharides	D-ribose utilization	Predicted nucleoside ABC transporter, ATP-binding component	0.0250763	0.00898013	0	0.032272	0	1.01595	1.02508	0.993029	1.02508
Carbohydrates	Monosaccharides	Deoxyribose and Deoxynucleoside Catabolism	Predicted nucleoside ABC transporter, ATP-binding component - #1	0.0250763	0.00898013	0	0.032272	0	1.01595	1.02508	0.993029	1.02508
Carbohydrates	CO2 fixation	CO2 uptake, carboxysome	putative sodium-dependent bicarbonate transporter	0.0571182	0.0404106	0.147324	0.165971	0	1.01606	0.921377	0.906642	1.05712
Carbohydrates	Organic acids	Isobutyryl-CoA to Propionyl-CoA Module	Enoyl-CoA hydratase [valine degradation] (EC 4.2.1.17) - #2	0.0710494	0.0538808	0.0391819	0.047947	0.0235289	1.01629	1.03067	1.02205	1.04643
Carbohydrates	Monosaccharides	D-Galacturonate and D-Glucuronate Utilization	Uronate dehydrogenase (EC 1.1.1.203)	0.0208969	0.00449006	0.00783638	0.0304279	0.00470577	1.01633	1.01296	0.99075	1.01612
Carbohydrates	Di- and oligosaccharides	Maltose and Maltodextrin Utilization	Maltose/maltodextrin ABC transporter, permease protein MalF	0.0612976	0.0440026	0	0.0304279	0.0705866	1.01657	1.0613	1.02996	0.991323
Carbohydrates	Sugar alcohols	Inositol catabolism	Inosose dehydratase (EC 4.2.1.44)	0.0167175	0	0.0376146	0.0405706	0.0494106	1.01672	0.97986	0.977077	0.968846
Carbohydrates	Central carbohydrate metabolism	Pyruvate:ferredoxin oxidoreductase	Pyruvate-flavodoxin oxidoreductase (EC 1.2.7.-) - #1	0.0167175	0	0.205313	0.12079	0.188231	1.01672	0.84353	0.907144	0.855657
Carbohydrates	Monosaccharides	D-Galacturonate and D-Glucuronate Utilization	2-deoxy-D-gluconate 3-dehydrogenase (EC 1.1.1.125)	0.0459732	0.0287364	0.0313455	0	0	1.01676	1.01418	1.04597	1.04597
Carbohydrates	One-carbon Metabolism	Formaldehyde assimilation: Ribulose monophosphate pathway	D-arabino-3-hexulose 6-phosphate formaldehyde lyase	0.0599044	0.0413086	0.0830656	0.0580897	0	1.01786	0.978615	1.00172	1.0599
Carbohydrates	Carbohydrates	Sugar utilization in Thermotogales	Alcohol dehydrogenase, zinc-containing	0.0417938	0.0233483	0.0109709	0.0258176	0	1.01802	1.03049	1.01557	1.04179
Carbohydrates	CO2 fixation	CO2 uptake, carboxysome	carboxysome shell protein CsoS2	0.0181106	0	0	0	0	1.01811	1.01811	1.01811	1.01811
Carbohydrates	Central carbohydrate metabolism	Pyruvate metabolism I: anaplerotic reactions, PEP	Pyruvate carboxyl transferase (EC 6.4.1.1)	0.0181106	0	0.062691	0.141075	0.0799981	1.01811	0.95805	0.892238	0.942697
Carbohydrates	CO2 fixation	Photorespiration (oxidative C2 cycle)	Ribulose bisphosphate carboxylase large chain (EC 4.1.1.39) - #3	0.02229	0.00359205	0.111277	0.03135	0.0682337	1.01863	0.919924	0.991215	0.956991
Carbohydrates	CO2 fixation	Carboxysome	Ribulose bisphosphate carboxylase large chain (EC 4.1.1.39) - #2	0.02229	0.00359205	0.111277	0.03135	0.0682337	1.01863	0.919924	0.991215	0.956991
Carbohydrates	CO2 fixation	Calvin-Benson cycle	Ribulose bisphosphate carboxylase large chain (EC 4.1.1.39) - #1	0.02229	0.00359205	0.111277	0.03135	0.0682337	1.01863	0.919924	0.991215	0.956991
Carbohydrates	CO2 fixation	CO2 uptake, carboxysome	Ribulose bisphosphate carboxylase large chain (EC 4.1.1.39)	0.02229	0.00359205	0.111277	0.03135	0.0682337	1.01863	0.919924	0.991215	0.956991
Carbohydrates	Monosaccharides	Xylose utilization	predicted 2-keto-3-deoxyxylonate dehydratase	0.0278625	0.00898013	0.0125382	0.015675	0.0447048	1.01871	1.01513	1.012	0.983878
Carbohydrates	Polysaccharides	Glycogen metabolism	Glycogen debranching enzyme (EC 3.2.1.-) - #1	0.0612976	0.0413086	0.181804	0.138309	0.31764	1.0192	0.898032	0.932346	0.805454
Carbohydrates	Di- and oligosaccharides	Trehalose Biosynthesis	Glycogen debranching enzyme (EC 3.2.1.-)	0.0612976	0.0413086	0.181804	0.138309	0.31764	1.0192	0.898032	0.932346	0.805454
Carbohydrates	Organic acids	Propionyl-CoA to Succinyl-CoA Module	B12 binding domain of Methylmalonyl-CoA mutase (EC 5.4.99.2)	0.0724426	0.0520847	0.028211	0.0175191	0.00470577	1.01935	1.04302	1.05398	1.06742
Carbohydrates	Monosaccharides	Mannose Metabolism	Beta-mannosidase (EC 3.2.1.25)	0.0195038	0	0.119113	0.0663882	0	1.0195	0.910993	0.956034	1.0195
Carbohydrates	One-carbon Metabolism	Serine-glyoxylate cycle	decarboxylase	2.29727	2.23156	2.36345	2.61496	3.08699	1.02033	0.980322	0.912117	0.806772
Carbohydrates	Central carbohydrate metabolism	Entner-Doudoroff Pathway	Gluconate dehydratase (EC 4.2.1.39)	0.123988	0.101475	0.0470183	0.0248956	0.082351	1.02044	1.07351	1.09669	1.03847
Carbohydrates	Monosaccharides	D-gluconate and ketogluconates metabolism	Gluconate dehydratase (EC 4.2.1.39) - #1	0.123988	0.101475	0.0470183	0.0248956	0.082351	1.02044	1.07351	1.09669	1.03847
Carbohydrates	Central carbohydrate metabolism	Glycolate, glyoxylate interconversions	Glycolate dehydrogenase (EC 1.1.99.14), iron-sulfur subunit GlcF - #1	0.114236	0.0915973	0.145757	0.0875955	0.131762	1.02074	0.97249	1.0245	0.984515
Carbohydrates	CO2 fixation	Photorespiration (oxidative C2 cycle)	Glycolate dehydrogenase (EC 1.1.99.14), iron-sulfur subunit GlcF	0.114236	0.0915973	0.145757	0.0875955	0.131762	1.02074	0.97249	1.0245	0.984515
Carbohydrates	Monosaccharides	Fructose utilization	Fructose ABC transporter, permease component FrcC	0.0612976	0.0395126	0.0548546	0.0488691	0	1.02096	1.00611	1.01185	1.0613
Carbohydrates	Central carbohydrate metabolism	Ethylmalonyl-CoA pathway of C2 assimilation	L-malyl-CoA/beta-methylmalyl-CoA lyase (EC 4.1.3.-), actinobacterial type	0.0264694	0.00538808	0	0	0	1.02097	1.02647	1.02647	1.02647
Carbohydrates	Di- and oligosaccharides	Trehalose Biosynthesis	Putative glucanase glgE (EC 3.2.1.-)	0.0348282	0.0134702	0	0.0119868	0.0658808	1.02107	1.03483	1.02257	0.970867
Carbohydrates	Central carbohydrate metabolism	Glycolysis and Gluconeogenesis	Pyruvate,phosphate dikinase (EC 2.7.9.1)	0.37893	0.350225	0.186506	0.167815	0.287052	1.02126	1.16218	1.18078	1.07139
Carbohydrates	Central carbohydrate metabolism	Pyruvate metabolism I: anaplerotic reactions, PEP	Pyruvate,phosphate dikinase (EC 2.7.9.1) - #2	0.37893	0.350225	0.186506	0.167815	0.287052	1.02126	1.16218	1.18078	1.07139
Carbohydrates	Central carbohydrate metabolism	Glycolysis and Gluconeogenesis, including Archaeal enzymes	Pyruvate,phosphate dikinase (EC 2.7.9.1) - #1	0.37893	0.350225	0.186506	0.167815	0.287052	1.02126	1.16218	1.18078	1.07139
Carbohydrates	Central carbohydrate metabolism	Ethylmalonyl-CoA pathway of C2 assimilation	Mesaconyl-CoA hydratase	0.0571182	0.0350225	0.0109709	0.00829853	0	1.02135	1.04565	1.04842	1.05712
Carbohydrates	Fermentation	Acetyl-CoA fermentation to Butyrate	Electron transfer flavoprotein-ubiquinone oxidoreductase (EC 1.5.5.1) - #1	0.104484	0.0808211	0.0940365	0.150296	0.435284	1.02189	1.00955	0.960175	0.769523
Carbohydrates	Aminosugars	Chitin and N-acetylglucosamine utilization	PTS system, N-acetylglucosamine-specific IIB component (EC 2.7.1.69)	0.02229	0	0	0	0	1.02229	1.02229	1.02229	1.02229
Carbohydrates	Aminosugars	Chitin and N-acetylglucosamine utilization	PTS system, N-acetylglucosamine-specific IIC component (EC 2.7.1.69)	0.02229	0	0	0	0	1.02229	1.02229	1.02229	1.02229
Carbohydrates	Central carbohydrate metabolism	Pyruvate Alanine Serine Interconversions	D-amino acid dehydrogenase small subunit (EC 1.4.99.1)	0.02229	0	0.0705274	0.0820632	0.0894097	1.02229	0.954941	0.94476	0.938389
Carbohydrates	Carbohydrates	Sugar utilization in Thermotogales	Predicted beta-glucoside-regulated ABC transport system, sugar binding component, COG1653	0.0292557	0.00628609	0.0156728	0.0110647	0	1.02283	1.01337	1.01799	1.02926
Carbohydrates	Di- and oligosaccharides	Beta-Glucoside Metabolism	Predicted beta-glucoside-regulated ABC transport system, sugar binding component, COG1653 - #1	0.0292557	0.00628609	0.0156728	0.0110647	0	1.02283	1.01337	1.01799	1.02926
Carbohydrates	Central carbohydrate metabolism	Methylglyoxal Metabolism	Aldehyde dehydrogenase A (EC 1.2.1.22)	0.0236831	0	0	0	0	1.02368	1.02368	1.02368	1.02368
Carbohydrates	Monosaccharides	L-rhamnose utilization	Aldehyde dehydrogenase A (EC 1.2.1.22) - #1	0.0236831	0	0	0	0	1.02368	1.02368	1.02368	1.02368
Carbohydrates	Central carbohydrate metabolism	Pentose phosphate pathway	Fructose-6-phosphate phosphoketolase (EC 4.1.2.22)	0.0236831	0	0.0438837	0.0101426	0.282346	1.02368	0.980649	1.0134	0.798289
Carbohydrates	Central carbohydrate metabolism	Pentose phosphate pathway	Xylulose-5-phosphate phosphoketolase (EC 4.1.2.9)	0.0236831	0	0.0438837	0.0101426	0.282346	1.02368	0.980649	1.0134	0.798289
Carbohydrates	Fermentation	Fermentations: Lactate	Fructose-6-phosphate phosphoketolase (EC 4.1.2.22) - #1	0.0236831	0	0.0438837	0.0101426	0.282346	1.02368	0.980649	1.0134	0.798289
Carbohydrates	Fermentation	Fermentations: Lactate	Xylulose-5-phosphate phosphoketolase (EC 4.1.2.9) - #1	0.0236831	0	0.0438837	0.0101426	0.282346	1.02368	0.980649	1.0134	0.798289
Carbohydrates	Central carbohydrate metabolism	TCA Cycle	Succinate dehydrogenase iron-sulfur protein (EC 1.3.99.1)	0.345495	0.314304	0.413761	0.194554	0.294111	1.02373	0.951714	1.12636	1.03971
Carbohydrates	One-carbon Metabolism	Serine-glyoxylate cycle	Succinate dehydrogenase iron-sulfur protein (EC 1.3.99.1) - #1	0.345495	0.314304	0.413761	0.194554	0.294111	1.02373	0.951714	1.12636	1.03971
Carbohydrates	Organic acids	Lactate utilization	L-lactate dehydrogenase (EC 1.1.2.3) - #1	0.391468	0.359205	0.297782	0.248034	0.199995	1.02374	1.07219	1.11493	1.15956
Carbohydrates	Monosaccharides	L-rhamnose utilization	L-lactate dehydrogenase (EC 1.1.2.3)	0.391468	0.359205	0.297782	0.248034	0.199995	1.02374	1.07219	1.11493	1.15956
Carbohydrates	Carbohydrates	Sugar utilization in Thermotogales	6-phosphogluconate dehydrogenase, decarboxylating (EC 1.1.1.44)	0.179713	0.150866	0.152026	0.137387	0.21176	1.02507	1.02403	1.03721	0.973554
Carbohydrates	Central carbohydrate metabolism	Pentose phosphate pathway	6-phosphogluconate dehydrogenase, decarboxylating (EC 1.1.1.44) - #1	0.179713	0.150866	0.152026	0.137387	0.21176	1.02507	1.02403	1.03721	0.973554
Carbohydrates	Monosaccharides	D-gluconate and ketogluconates metabolism	6-phosphogluconate dehydrogenase, decarboxylating (EC 1.1.1.44) - #2	0.179713	0.150866	0.152026	0.137387	0.21176	1.02507	1.02403	1.03721	0.973554
Carbohydrates	Monosaccharides	D-galactarate, D-glucarate and D-glycerate catabolism	D-galactarate dehydratase (EC 4.2.1.42) - #1	0.0306488	0.00538808	0.0203746	0.0451809	0.00470577	1.02513	1.01007	0.986096	1.02582
Carbohydrates	Monosaccharides	D-Galacturonate and D-Glucuronate Utilization	D-galactarate dehydratase (EC 4.2.1.42)	0.0306488	0.00538808	0.0203746	0.0451809	0.00470577	1.02513	1.01007	0.986096	1.02582
Carbohydrates	Organic acids	Isobutyryl-CoA to Propionyl-CoA Module	Enoyl-CoA hydratase [isoleucine degradation] (EC 4.2.1.17) - #2	0.0891601	0.0619629	0	0.194554	0.197642	1.02561	1.08916	0.911771	0.90942
Carbohydrates	Sugar alcohols	Glycerol and Glycerol-3-phosphate Uptake and Utilization	Glycerol-3-phosphate dehydrogenase [NAD(P)+] (EC 1.1.1.94)	0.20061	0.169724	0.186506	0.175191	0.258817	1.0264	1.01189	1.02163	0.95376
Carbohydrates	Carbohydrates	Sugar utilization in Thermotogales	Inosose isomerase (EC 5.3.99.-)	0.0654769	0.0377165	0.0438837	0.0387265	0.0729395	1.02675	1.02069	1.02575	0.993045
Carbohydrates	Sugar alcohols	Inositol catabolism	Inosose isomerase (EC 5.3.99.-) - #1	0.0654769	0.0377165	0.0438837	0.0387265	0.0729395	1.02675	1.02069	1.02575	0.993045
Carbohydrates	Central carbohydrate metabolism	Pyruvate metabolism II: acetyl-CoA, acetogenesis from pyruvate	Pyruvate dehydrogenase E1 component (EC 1.2.4.1) - #2	1.17441	1.11623	0.910587	0.733036	0.868215	1.02749	1.13808	1.25468	1.16389
Carbohydrates	Central carbohydrate metabolism	Dehydrogenase complexes	Pyruvate dehydrogenase E1 component (EC 1.2.4.1) - #1	1.17441	1.11623	0.910587	0.733036	0.868215	1.02749	1.13808	1.25468	1.16389
Carbohydrates	One-carbon Metabolism	Serine-glyoxylate cycle	Serine-pyruvate aminotransferase/archaeal aspartate aminotransferase	0.0487594	0.0206543	0.0203746	0.0405706	0.0799981	1.02754	1.02782	1.00787	0.971075
Carbohydrates	Central carbohydrate metabolism	Pyruvate Alanine Serine Interconversions	Alanine dehydrogenase (EC 1.4.1.1)	0.281412	0.246953	0.311888	0.247112	0.188231	1.02763	0.976769	1.0275	1.07842
Carbohydrates	Central carbohydrate metabolism	Glycolysis and Gluconeogenesis, including Archaeal enzymes	Fructose-1,6-bisphosphatase, type I (EC 3.1.3.11) - #2	0.0682632	0.0395126	0.0830656	0.165048	0.119997	1.02766	0.986333	0.916926	0.953809
Carbohydrates	Central carbohydrate metabolism	Glycolysis and Gluconeogenesis	Fructose-1,6-bisphosphatase, type I (EC 3.1.3.11) - #1	0.0682632	0.0395126	0.0830656	0.165048	0.119997	1.02766	0.986333	0.916926	0.953809
Carbohydrates	CO2 fixation	Calvin-Benson cycle	Fructose-1,6-bisphosphatase, type I (EC 3.1.3.11)	0.0682632	0.0395126	0.0830656	0.165048	0.119997	1.02766	0.986333	0.916926	0.953809
Carbohydrates	Central carbohydrate metabolism	Methylglyoxal Metabolism	Aldehyde dehydrogenase (EC 1.2.1.3)	1.02255	0.966262	0.927827	0.645441	0.390579	1.02863	1.04914	1.22919	1.45447
Carbohydrates	Central carbohydrate metabolism	Pyruvate metabolism II: acetyl-CoA, acetogenesis from pyruvate	Aldehyde dehydrogenase (EC 1.2.1.3) - #1	1.02255	0.966262	0.927827	0.645441	0.390579	1.02863	1.04914	1.22919	1.45447
Carbohydrates	One-carbon Metabolism	Serine-glyoxylate cycle	Acetyl-CoA acetyltransferase (EC 2.3.1.9) - #4	0.65059	0.604363	0.391819	0.784672	0.816451	1.02881	1.18592	0.92487	0.908689
Carbohydrates	Fermentation	Acetyl-CoA fermentation to Butyrate	Acetyl-CoA acetyltransferase (EC 2.3.1.9) - #2	0.65059	0.604363	0.391819	0.784672	0.816451	1.02881	1.18592	0.92487	0.908689
Carbohydrates	Fermentation	Butanol Biosynthesis	Acetyl-CoA acetyltransferase (EC 2.3.1.9) - #3	0.65059	0.604363	0.391819	0.784672	0.816451	1.02881	1.18592	0.92487	0.908689
Carbohydrates	Fermentation	Acetone Butanol Ethanol Synthesis	Acetyl-CoA acetyltransferase (EC 2.3.1.9) - #1	0.65059	0.604363	0.391819	0.784672	0.816451	1.02881	1.18592	0.92487	0.908689
Carbohydrates	Central carbohydrate metabolism	TCA Cycle	Malate:quinone oxidoreductase (EC 1.1.99.16)	0.0473663	0.0179603	0.0564219	0.0368823	0	1.02889	0.991428	1.01011	1.04737
Carbohydrates	Sugar alcohols	Glycerol and Glycerol-3-phosphate Uptake and Utilization	Glycerol-3-phosphate ABC transporter, ATP-binding protein UgpC (TC 3.A.1.1.3)	0.11145	0.0790251	0.0720947	0.118023	0.0705866	1.03005	1.03671	0.994121	1.03817
Carbohydrates	One-carbon Metabolism	Serine-glyoxylate cycle	3-ketoacyl-CoA thiolase (EC 2.3.1.16) - #1	0.816372	0.763311	0.501528	0.702609	0.658808	1.03009	1.20968	1.06682	1.09499
Carbohydrates	Monosaccharides	L-fucose utilization	Possible fucose ABC transporter, substrate-binding component	0.0348282	0.00449006	0.0156728	0.00276618	0	1.0302	1.01886	1.03197	1.03483
Carbohydrates	CO2 fixation	CO2 uptake, carboxysome	NADH dehydrogenase subunit 5, Involved in CO2 fixation	0.0459732	0.0152662	0.0391819	0.0193632	0.00705866	1.03025	1.00654	1.0261	1.03864
Carbohydrates	Central carbohydrate metabolism	Ethylmalonyl-CoA pathway of C2 assimilation	Ethylmalonyl-CoA mutase, methylsuccinyl-CoA-forming	0.185286	0.149968	0.00783638	0	0.061175	1.03071	1.17607	1.18529	1.11696
Carbohydrates	Sugar alcohols	Glycerol and Glycerol-3-phosphate Uptake and Utilization	Glycerol-3-phosphate ABC transporter, periplasmic glycerol-3-phosphate-binding protein (TC 3.A.1.1.3) - #1	0.0459732	0.0143682	0.0548546	0.0829853	0.0282346	1.03116	0.99158	0.965824	1.01725
Carbohydrates	Carbohydrates	Sugar utilization in Thermotogales	Glycerol-3-phosphate ABC transporter, periplasmic glycerol-3-phosphate-binding protein (TC 3.A.1.1.3)	0.0459732	0.0143682	0.0548546	0.0829853	0.0282346	1.03116	0.99158	0.965824	1.01725
Carbohydrates	Central carbohydrate metabolism	TCA Cycle	Citrate synthase (si) (EC 2.3.3.1) - #1	0.560037	0.511867	0.579892	0.406628	0.33411	1.03186	0.987433	1.10906	1.16935
Carbohydrates	One-carbon Metabolism	Serine-glyoxylate cycle	Citrate synthase (si) (EC 2.3.3.1) - #2	0.560037	0.511867	0.579892	0.406628	0.33411	1.03186	0.987433	1.10906	1.16935
Carbohydrates	Central carbohydrate metabolism	Glyoxylate bypass	Citrate synthase (si) (EC 2.3.3.1)	0.560037	0.511867	0.579892	0.406628	0.33411	1.03186	0.987433	1.10906	1.16935
Carbohydrates	Sugar alcohols	Inositol catabolism	Epi-inositol hydrolase (EC 3.7.1.-)	0.117023	0.0817192	0.0611237	0.0525573	0	1.03264	1.05268	1.06125	1.11702
Carbohydrates	One-carbon Metabolism	Formaldehyde assimilation: Ribulose monophosphate pathway	Formaldehyde activating enzyme	0.033435	0	0.01724	0.0119868	0	1.03344	1.01592	1.02119	1.03344
Carbohydrates	One-carbon Metabolism	Methanogenesis from methylated compounds	Trimethylamine:corrinoid methyltransferase	0.0348282	0.000898013	0	0	0	1.0339	1.03483	1.03483	1.03483
Carbohydrates	Monosaccharides	Fructose utilization	Fructose ABC transporter, substrate-binding component FrcB	0.0599044	0.0251444	0.0642583	0.0580897	0	1.03391	0.995909	1.00172	1.0599
Carbohydrates	Sugar alcohols	Glycerol and Glycerol-3-phosphate Uptake and Utilization	Glycerol-3-phosphate dehydrogenase (EC 1.1.5.3) - #1	0.176927	0.137396	0.10344	0.0802191	0.0658808	1.03476	1.0666	1.08953	1.10418
Carbohydrates	Carbohydrates	Sugar utilization in Thermotogales	Glycerol-3-phosphate dehydrogenase (EC 1.1.5.3)	0.176927	0.137396	0.10344	0.0802191	0.0658808	1.03476	1.0666	1.08953	1.10418
Carbohydrates	Central carbohydrate metabolism	Methylglyoxal Metabolism	Lactoylglutathione lyase (EC 4.4.1.5)	0.0529388	0.0161642	0.0658256	0.0599338	0	1.03619	0.987909	0.993401	1.05294
Carbohydrates	Central carbohydrate metabolism	Pyruvate metabolism I: anaplerotic reactions, PEP	Pyruvate carboxyl transferase subunit A (EC 6.4.1.1)	0.0529388	0.0161642	0.0595565	0.0488691	0.0517635	1.03619	0.993754	1.00388	1.00112
Carbohydrates	Central carbohydrate metabolism	Pyruvate metabolism II: acetyl-CoA, acetogenesis from pyruvate	Dihydrolipoamide acetyltransferase component of pyruvate dehydrogenase complex (EC 2.3.1.12) - #1	0.179713	0.138294	0.225688	0.365135	0.298816	1.03639	0.962491	0.864173	0.908299
Carbohydrates	Central carbohydrate metabolism	Dehydrogenase complexes	Dihydrolipoamide acetyltransferase component of pyruvate dehydrogenase complex (EC 2.3.1.12)	0.179713	0.138294	0.225688	0.365135	0.298816	1.03639	0.962491	0.864173	0.908299
Carbohydrates	Monosaccharides	D-galactarate, D-glucarate and D-glycerate catabolism	Glucarate dehydratase (EC 4.2.1.40)	0.098912	0.0601669	0.0219419	0.0645441	0.0423519	1.03655	1.07532	1.03228	1.05426
Carbohydrates	Central carbohydrate metabolism	Glyoxylate bypass	Aconitate hydratase 2 (EC 4.2.1.3)	0.203396	0.159846	0.183371	0.164126	0.134114	1.03755	1.01692	1.03373	1.06109
Carbohydrates	Organic acids	Propionate-CoA to Succinate Module	Aconitate hydratase 2 (EC 4.2.1.3) - #2	0.203396	0.159846	0.183371	0.164126	0.134114	1.03755	1.01692	1.03373	1.06109
Carbohydrates	Central carbohydrate metabolism	TCA Cycle	Aconitate hydratase 2 (EC 4.2.1.3) - #1	0.203396	0.159846	0.183371	0.164126	0.134114	1.03755	1.01692	1.03373	1.06109
Carbohydrates	Monosaccharides	L-fucose utilization temp	L-fuco-beta-pyranose dehydrogenase	0.0376144	0	0	0	0	1.03761	1.03761	1.03761	1.03761
Carbohydrates	One-carbon Metabolism	Serine-glyoxylate cycle	Fumarate hydratase class I, aerobic (EC 4.2.1.2) - #1	0.639445	0.57832	0.512499	0.268319	0.242347	1.03873	1.08393	1.29261	1.31964
Carbohydrates	Central carbohydrate metabolism	TCA Cycle	Fumarate hydratase class I, aerobic (EC 4.2.1.2)	0.639445	0.57832	0.512499	0.268319	0.242347	1.03873	1.08393	1.29261	1.31964
Carbohydrates	Monosaccharides	L-fucose utilization	Possible fucose ABC transporter, ATP-binding component	0.0682632	0.0278384	0.0266437	0.00737647	0.0164702	1.03933	1.04054	1.06044	1.05095
Carbohydrates	CO2 fixation	CO2 uptake, carboxysome	NADH dehydrogenase subunit 4, Involved in CO2 fixation	0.04458	0.00449006	0.0752292	0.0304279	0	1.03991	0.971495	1.01373	1.04458
Carbohydrates	Monosaccharides	D-ribose utilization	Ribose ABC transport system, ATP-binding protein RbsA (TC 3.A.1.2.1) - #1	0.0404007	0	0	0	0	1.0404	1.0404	1.0404	1.0404
Carbohydrates	Carbohydrates	Sugar utilization in Thermotogales	Ribose ABC transport system, ATP-binding protein RbsA (TC 3.A.1.2.1)	0.0404007	0	0	0	0	1.0404	1.0404	1.0404	1.0404
Carbohydrates	Central carbohydrate metabolism	Glyoxylate bypass	Isocitrate lyase (EC 4.1.3.1)	0.125381	0.0808211	0.158295	0.22406	0.167055	1.04123	0.971585	0.919384	0.964292
Carbohydrates	One-carbon Metabolism	Serine-glyoxylate cycle	Isocitrate lyase (EC 4.1.3.1) - #1	0.125381	0.0808211	0.158295	0.22406	0.167055	1.04123	0.971585	0.919384	0.964292
Carbohydrates	Monosaccharides	D-Sorbitol(D-Glucitol) and L-Sorbose Utilization	PTS system, glucitol/sorbitol-specific IIB component and second of two IIC components (EC 2.7.1.69)	0.0473663	0.00538808	0.0203746	0	0	1.04175	1.02645	1.04737	1.04737
Carbohydrates	Central carbohydrate metabolism	Glycolysis and Gluconeogenesis	Polyphosphate glucokinase (EC 2.7.1.63) - #1	0.0515457	0.00898013	0.0971711	0.0424147	0.021176	1.04219	0.958415	1.00876	1.02974
Carbohydrates	Central carbohydrate metabolism	Entner-Doudoroff Pathway	Polyphosphate glucokinase (EC 2.7.1.63)	0.0515457	0.00898013	0.0971711	0.0424147	0.021176	1.04219	0.958415	1.00876	1.02974
Carbohydrates	CO2 fixation	Photorespiration (oxidative C2 cycle)	Aminomethyltransferase (glycine cleavage system T protein) (EC 2.1.2.10) - #2	0.408186	0.351123	0.230389	0.267397	0.232936	1.04223	1.1445	1.11109	1.14214
Carbohydrates	Carbohydrates	Sugar utilization in Thermotogales	Ribulose-phosphate 3-epimerase (EC 5.1.3.1)	0.154637	0.107762	0.161429	0.223138	0.207054	1.04232	0.994152	0.943996	0.956574
Carbohydrates	Central carbohydrate metabolism	Pentose phosphate pathway	Ribulose-phosphate 3-epimerase (EC 5.1.3.1) - #2	0.154637	0.107762	0.161429	0.223138	0.207054	1.04232	0.994152	0.943996	0.956574
Carbohydrates	CO2 fixation	Calvin-Benson cycle	Ribulose-phosphate 3-epimerase (EC 5.1.3.1) - #1	0.154637	0.107762	0.161429	0.223138	0.207054	1.04232	0.994152	0.943996	0.956574
Carbohydrates	Organic acids	Isobutyryl-CoA to Propionyl-CoA Module	Methylmalonate-semialdehyde dehydrogenase (EC 1.2.1.27) - #2	0.381717	0.324183	0.304051	0.22406	0.392932	1.04345	1.05956	1.1288	0.991948
Carbohydrates	Central carbohydrate metabolism	Pyruvate metabolism I: anaplerotic reactions, PEP	Pyruvate carboxyl transferase subunit B (EC 6.4.1.1)	0.0668701	0.0215523	0.0736619	0.0461029	0	1.04436	0.993674	1.01985	1.06687
Carbohydrates	Central carbohydrate metabolism	Pentose phosphate pathway	Glucose-6-phosphate 1-dehydrogenase (EC 1.1.1.49) - #2	0.224293	0.17152	0.109709	0.176113	0.376462	1.04505	1.10326	1.04097	0.88945
Carbohydrates	Central carbohydrate metabolism	Entner-Doudoroff Pathway	Glucose-6-phosphate 1-dehydrogenase (EC 1.1.1.49) - #1	0.224293	0.17152	0.109709	0.176113	0.376462	1.04505	1.10326	1.04097	0.88945
Carbohydrates	Carbohydrates	Sugar utilization in Thermotogales	Glucose-6-phosphate 1-dehydrogenase (EC 1.1.1.49)	0.224293	0.17152	0.109709	0.176113	0.376462	1.04505	1.10326	1.04097	0.88945
Carbohydrates	Organic acids	Methylcitrate cycle	2-methylisocitrate dehydratase (EC 4.2.1.99)	0.447194	0.384349	0.318157	0.274773	0.319992	1.0454	1.09789	1.13526	1.09637
Carbohydrates	Organic acids	Propionate-CoA to Succinate Module	2-methylisocitrate dehydratase (EC 4.2.1.99) - #1	0.447194	0.384349	0.318157	0.274773	0.319992	1.0454	1.09789	1.13526	1.09637
Carbohydrates	CO2 fixation	Carboxysome	Carbonic anhydrase (EC 4.2.1.1)	0.22708	0.173316	0.310321	0.284916	0.185878	1.04582	0.936473	0.954988	1.03474
Carbohydrates	Central carbohydrate metabolism	Entner-Doudoroff Pathway	Phosphogluconate dehydratase (EC 4.2.1.12)	0.0863738	0.0386145	0.0924692	0.0839073	0.0941154	1.04598	0.994421	1.00228	0.992924
Carbohydrates	Central carbohydrate metabolism	HPr kinase and hprK operon in Gram-positive organisms	Prolipoprotein diacylglyceryl transferase (EC 2.4.99.-)	0.282805	0.226299	0.180237	0.213918	0.143526	1.04608	1.0869	1.05675	1.1218
Carbohydrates	Di- and oligosaccharides	Fructooligosaccharides(FOS) and Raffinose Utilization	Multiple sugar ABC transporter, substrate-binding protein	0.0529388	0.00628609	0.00313455	0	0	1.04636	1.04965	1.05294	1.05294
Carbohydrates	Central carbohydrate metabolism	Glycolysis and Gluconeogenesis	Pyruvate kinase (EC 2.7.1.40) - #1	0.476449	0.410392	0.514066	0.364213	0.496459	1.04684	0.975155	1.08227	0.986629
Carbohydrates	Central carbohydrate metabolism	Glycolysis and Gluconeogenesis, including Archaeal enzymes	Pyruvate kinase (EC 2.7.1.40) - #2	0.476449	0.410392	0.514066	0.364213	0.496459	1.04684	0.975155	1.08227	0.986629
Carbohydrates	Central carbohydrate metabolism	Pyruvate metabolism I: anaplerotic reactions, PEP	Pyruvate kinase (EC 2.7.1.40) - #3	0.476449	0.410392	0.514066	0.364213	0.496459	1.04684	0.975155	1.08227	0.986629
Carbohydrates	Organic acids	Glycerate metabolism	Pyruvate kinase (EC 2.7.1.40) - #4	0.476449	0.410392	0.514066	0.364213	0.496459	1.04684	0.975155	1.08227	0.986629
Carbohydrates	Central carbohydrate metabolism	Entner-Doudoroff Pathway	Pyruvate kinase (EC 2.7.1.40)	0.476449	0.410392	0.514066	0.364213	0.496459	1.04684	0.975155	1.08227	0.986629
Carbohydrates	CO2 fixation	Calvin-Benson cycle	NAD-dependent glyceraldehyde-3-phosphate dehydrogenase (EC 1.2.1.12)	0.617155	0.543298	0.551681	0.444432	0.312934	1.04786	1.0422	1.11958	1.23171
Carbohydrates	Central carbohydrate metabolism	Entner-Doudoroff Pathway	NAD-dependent glyceraldehyde-3-phosphate dehydrogenase (EC 1.2.1.12) - #1	0.617155	0.543298	0.551681	0.444432	0.312934	1.04786	1.0422	1.11958	1.23171
Carbohydrates	Central carbohydrate metabolism	Glycolysis and Gluconeogenesis	NAD-dependent glyceraldehyde-3-phosphate dehydrogenase (EC 1.2.1.12) - #2	0.617155	0.543298	0.551681	0.444432	0.312934	1.04786	1.0422	1.11958	1.23171
Carbohydrates	One-carbon Metabolism	Serine-glyoxylate cycle	Succinyl-CoA ligase [ADP-forming] alpha chain (EC 6.2.1.5) - #1	0.420724	0.355613	0.510932	0.502522	0.399991	1.04803	0.940297	0.94556	1.01481
Carbohydrates	Central carbohydrate metabolism	TCA Cycle	Succinyl-CoA ligase [ADP-forming] alpha chain (EC 6.2.1.5)	0.420724	0.355613	0.510932	0.502522	0.399991	1.04803	0.940297	0.94556	1.01481
Carbohydrates	Central carbohydrate metabolism	Pyruvate metabolism I: anaplerotic reactions, PEP	Phosphoenolpyruvate synthase (EC 2.7.9.2) - #2	0.202003	0.146376	0.474884	0.389109	0.0941154	1.04852	0.814981	0.865305	1.09861
Carbohydrates	Central carbohydrate metabolism	Glycolysis and Gluconeogenesis, including Archaeal enzymes	Phosphoenolpyruvate synthase (EC 2.7.9.2) - #1	0.202003	0.146376	0.474884	0.389109	0.0941154	1.04852	0.814981	0.865305	1.09861
Carbohydrates	Central carbohydrate metabolism	Glycolysis and Gluconeogenesis	Phosphoenolpyruvate synthase (EC 2.7.9.2)	0.202003	0.146376	0.474884	0.389109	0.0941154	1.04852	0.814981	0.865305	1.09861
Carbohydrates	Central carbohydrate metabolism	Glycolysis and Gluconeogenesis	Fructose-bisphosphate aldolase class I (EC 4.1.2.13) - #2	0.28977	0.229891	0.150458	0.162282	0.22823	1.04869	1.12109	1.10969	1.0501
Carbohydrates	CO2 fixation	Calvin-Benson cycle	Fructose-bisphosphate aldolase class I (EC 4.1.2.13) - #1	0.28977	0.229891	0.150458	0.162282	0.22823	1.04869	1.12109	1.10969	1.0501
Carbohydrates	Carbohydrates	Unknown carbohydrate utilization ( cluster Yeg )	Fructose-bisphosphate aldolase class I (EC 4.1.2.13)	0.28977	0.229891	0.150458	0.162282	0.22823	1.04869	1.12109	1.10969	1.0501
Carbohydrates	CO2 fixation	Calvin-Benson cycle	Triosephosphate isomerase (EC 5.3.1.1)	0.40122	0.334959	0.369877	0.25541	0	1.04964	1.02288	1.11615	1.40122
Carbohydrates	Central carbohydrate metabolism	Glycolysis and Gluconeogenesis, including Archaeal enzymes	Triosephosphate isomerase (EC 5.3.1.1) - #2	0.40122	0.334959	0.369877	0.25541	0	1.04964	1.02288	1.11615	1.40122
Carbohydrates	Central carbohydrate metabolism	Glycolysis and Gluconeogenesis	Triosephosphate isomerase (EC 5.3.1.1) - #1	0.40122	0.334959	0.369877	0.25541	0	1.04964	1.02288	1.11615	1.40122
Carbohydrates	Central carbohydrate metabolism	Glycolysis and Gluconeogenesis, including Archaeal enzymes	Fructose-1,6-bisphosphatase, GlpX type (EC 3.1.3.11) - #2	0.26748	0.206543	0.079931	0.0931279	0.174114	1.05051	1.17367	1.1595	1.07952
Carbohydrates	Central carbohydrate metabolism	Glycolysis and Gluconeogenesis	Fructose-1,6-bisphosphatase, GlpX type (EC 3.1.3.11) - #1	0.26748	0.206543	0.079931	0.0931279	0.174114	1.05051	1.17367	1.1595	1.07952
Carbohydrates	CO2 fixation	Calvin-Benson cycle	Fructose-1,6-bisphosphatase, GlpX type (EC 3.1.3.11)	0.26748	0.206543	0.079931	0.0931279	0.174114	1.05051	1.17367	1.1595	1.07952
Carbohydrates	Carbohydrates	Sugar utilization in Thermotogales	Transketolase, C-terminal section (EC 2.2.1.1)	0.0905532	0.0377165	0.0548546	0.106959	0	1.05092	1.03384	0.98518	1.09055
Carbohydrates	CO2 fixation	Calvin-Benson cycle	Transketolase, C-terminal section (EC 2.2.1.1) - #1	0.0905532	0.0377165	0.0548546	0.106959	0	1.05092	1.03384	0.98518	1.09055
Carbohydrates	Central carbohydrate metabolism	Pentose phosphate pathway	Transketolase, C-terminal section (EC 2.2.1.1) - #2	0.0905532	0.0377165	0.0548546	0.106959	0	1.05092	1.03384	0.98518	1.09055
Carbohydrates	Monosaccharides	D-galactonate catabolism	Galactonate dehydratase (EC 4.2.1.6)	0.0571182	0.00359205	0.0689601	0.03135	0.0517635	1.05333	0.988922	1.02498	1.00509
Carbohydrates	Central carbohydrate metabolism	Ethylmalonyl-CoA pathway of C2 assimilation	Methylsuccinyl-CoA dehydrogenase, predicted by (Erb et al, 2007)	0.122595	0.0655549	0.0125382	0	0.061175	1.05353	1.10869	1.1226	1.05788
Carbohydrates	Sugar alcohols	Mannitol Utilization	Phosphoenolpyruvate-protein phosphotransferase of PTS system (EC 2.7.3.9)	0.20479	0.141886	0.210015	0.222216	0.399991	1.05509	0.995682	0.985742	0.86057
Carbohydrates	Sugar alcohols	Glycerol and Glycerol-3-phosphate Uptake and Utilization	Glycerol-3-phosphate ABC transporter, permease protein UgpA (TC 3.A.1.1.3) - #1	0.0863738	0.0296344	0.152026	0.107881	0.0447048	1.05511	0.943012	0.980587	1.03989
Carbohydrates	Carbohydrates	Sugar utilization in Thermotogales	Glycerol-3-phosphate ABC transporter, permease protein UgpA (TC 3.A.1.1.3)	0.0863738	0.0296344	0.152026	0.107881	0.0447048	1.05511	0.943012	0.980587	1.03989
Carbohydrates	Central carbohydrate metabolism	Entner-Doudoroff Pathway	Enolase (EC 4.2.1.11)	0.817765	0.717512	0.603401	0.502522	0.531752	1.05837	1.13369	1.20981	1.18672
Carbohydrates	Central carbohydrate metabolism	Glycolysis and Gluconeogenesis	Enolase (EC 4.2.1.11) - #1	0.817765	0.717512	0.603401	0.502522	0.531752	1.05837	1.13369	1.20981	1.18672
Carbohydrates	One-carbon Metabolism	Serine-glyoxylate cycle	Enolase (EC 4.2.1.11) - #3	0.817765	0.717512	0.603401	0.502522	0.531752	1.05837	1.13369	1.20981	1.18672
Carbohydrates	Central carbohydrate metabolism	Glycolysis and Gluconeogenesis, including Archaeal enzymes	Enolase (EC 4.2.1.11) - #2	0.817765	0.717512	0.603401	0.502522	0.531752	1.05837	1.13369	1.20981	1.18672
Carbohydrates	Di- and oligosaccharides	Lactose utilization	Beta-galactosidase (EC 3.2.1.23) - #2	0.13374	0.070943	0	0	0.282346	1.05864	1.13374	1.13374	0.884114
Carbohydrates	Di- and oligosaccharides	Lactose and Galactose Uptake and Utilization	Beta-galactosidase (EC 3.2.1.23) - #1	0.13374	0.070943	0	0	0.282346	1.05864	1.13374	1.13374	0.884114
Carbohydrates	Carbohydrates	Sugar utilization in Thermotogales	Beta-galactosidase (EC 3.2.1.23)	0.13374	0.070943	0	0	0.282346	1.05864	1.13374	1.13374	0.884114
Carbohydrates	Central carbohydrate metabolism	TCA Cycle	2-oxoglutarate dehydrogenase E1 component (EC 1.2.4.2) - #1	1.54637	1.39461	1.28203	1.05668	0.870568	1.06337	1.11583	1.2381	1.36128
Carbohydrates	Central carbohydrate metabolism	Dehydrogenase complexes	2-oxoglutarate dehydrogenase E1 component (EC 1.2.4.2)	1.54637	1.39461	1.28203	1.05668	0.870568	1.06337	1.11583	1.2381	1.36128
Carbohydrates	Central carbohydrate metabolism	Dehydrogenase complexes	Branched-chain alpha-keto acid dehydrogenase, E1 component, beta subunit (EC 1.2.4.4) - #4	0.20479	0.129314	0.289946	0.420459	0.265876	1.06683	0.933985	0.848169	0.951744
Carbohydrates	Monosaccharides	Xylose utilization	D-xylose transport ATP-binding protein XylG	0.142099	0.068249	0.0470183	0.0331941	0.0564693	1.06913	1.09081	1.10541	1.08105
Carbohydrates	Carbohydrates	Lacto-N-Biose I and Galacto-N-Biose Metabolic Pathway	UDP-glucose 4-epimerase (EC 5.1.3.2)	0.716067	0.604363	1.17075	1.02072	0.670572	1.06963	0.790539	0.849236	1.02723
Carbohydrates	Di- and oligosaccharides	Lactose and Galactose Uptake and Utilization	UDP-glucose 4-epimerase (EC 5.1.3.2) - #2	0.716067	0.604363	1.17075	1.02072	0.670572	1.06963	0.790539	0.849236	1.02723
Carbohydrates	Carbohydrates	Sugar utilization in Thermotogales	UDP-glucose 4-epimerase (EC 5.1.3.2) - #1	0.716067	0.604363	1.17075	1.02072	0.670572	1.06963	0.790539	0.849236	1.02723
Carbohydrates	Central carbohydrate metabolism	Dehydrogenase complexes	Branched-chain alpha-keto acid dehydrogenase, E1 component, alpha subunit (EC 1.2.4.4) - #4	0.20479	0.114946	0.22412	0.34946	0.192937	1.08058	0.984208	0.892794	1.00994
Carbohydrates	Carbohydrates	Sugar utilization in Thermotogales	Ribose ABC transport system, permease protein RbsC (TC 3.A.1.2.1)	0.207576	0.114946	0.128517	0	0.0847039	1.08308	1.07006	1.20758	1.11328
Carbohydrates	Monosaccharides	D-ribose utilization	Ribose ABC transport system, permease protein RbsC (TC 3.A.1.2.1) - #1	0.207576	0.114946	0.128517	0	0.0847039	1.08308	1.07006	1.20758	1.11328
Carbohydrates	Sugar alcohols	Inositol catabolism	Myo-inositol 2-dehydrogenase (EC 1.1.1.18)	0.16021	0.069147	0.0830656	0.113413	0.287052	1.08517	1.07123	1.04203	0.901447
Carbohydrates	CO2 fixation	Photorespiration (oxidative C2 cycle)	Serine hydroxymethyltransferase (EC 2.1.2.1) - #3	0.791296	0.649263	0.650419	0.574442	0.435284	1.08612	1.08536	1.13773	1.24804
Carbohydrates	One-carbon Metabolism	Serine-glyoxylate cycle	Serine hydroxymethyltransferase (EC 2.1.2.1) - #4	0.791296	0.649263	0.650419	0.574442	0.435284	1.08612	1.08536	1.13773	1.24804
Carbohydrates	Monosaccharides	Deoxyribose and Deoxynucleoside Catabolism	Putative deoxyribose-specific ABC transporter, ATP-binding protein	0.161603	0.0637589	0.0188073	0	0.0188231	1.09198	1.14016	1.1616	1.14014
Carbohydrates	Monosaccharides	L-fucose utilization temp	2-keto-3-deoxy-L-fuconate dehydrogenase - #1	0.150458	0.0529827	0.123815	0.0802191	0	1.09257	1.02371	1.06502	1.15046
Carbohydrates	Monosaccharides	L-fucose utilization	2-keto-3-deoxy-L-fuconate dehydrogenase	0.150458	0.0529827	0.123815	0.0802191	0	1.09257	1.02371	1.06502	1.15046
Carbohydrates	CO2 fixation	Photorespiration (oxidative C2 cycle)	2-hydroxy-3-oxopropionate reductase (EC 1.1.1.60)	0.231259	0.123028	0.126949	0.141997	0.235289	1.09637	1.09256	1.07816	0.996738
Carbohydrates	Monosaccharides	D-galactarate, D-glucarate and D-glycerate catabolism	2-hydroxy-3-oxopropionate reductase (EC 1.1.1.60) - #1	0.231259	0.123028	0.126949	0.141997	0.235289	1.09637	1.09256	1.07816	0.996738
Carbohydrates	Organic acids	Glycerate metabolism	2-hydroxy-3-oxopropionate reductase (EC 1.1.1.60) - #2	0.231259	0.123028	0.126949	0.141997	0.235289	1.09637	1.09256	1.07816	0.996738
Carbohydrates	Central carbohydrate metabolism	TCA Cycle	Isocitrate dehydrogenase [NADP] (EC 1.1.1.42)	0.826124	0.661835	0.531306	0.7524	0.710572	1.09886	1.19253	1.04207	1.06755
Carbohydrates	One-carbon Metabolism	Serine-glyoxylate cycle	Methylenetetrahydrofolate dehydrogenase (NADP+) (EC 1.5.1.5) - #1	0.408186	0.278384	0.382415	0.326409	0.216465	1.10154	1.01864	1.06165	1.1576
Carbohydrates	One-carbon Metabolism	One-carbon metabolism by tetrahydropterines	Methenyltetrahydrofolate cyclohydrolase (EC 3.5.4.9)	0.408186	0.278384	0.382415	0.326409	0.216465	1.10154	1.01864	1.06165	1.1576
Carbohydrates	One-carbon Metabolism	One-carbon metabolism by tetrahydropterines	Methylenetetrahydrofolate dehydrogenase (NADP+) (EC 1.5.1.5)	0.408186	0.278384	0.382415	0.326409	0.216465	1.10154	1.01864	1.06165	1.1576
Carbohydrates	One-carbon Metabolism	Serine-glyoxylate cycle	Methenyltetrahydrofolate cyclohydrolase (EC 3.5.4.9) - #1	0.408186	0.278384	0.382415	0.326409	0.216465	1.10154	1.01864	1.06165	1.1576
Carbohydrates	Sugar alcohols	Glycerol and Glycerol-3-phosphate Uptake and Utilization	Glycerophosphoryl diester phosphodiesterase (EC 3.1.4.46)	0.103091	0	0.112844	0.0820632	0	1.10309	0.991236	1.01943	1.10309
Carbohydrates	One-carbon Metabolism	Serine-glyoxylate cycle	Formate--tetrahydrofolate ligase (EC 6.3.4.3) - #1	0.476449	0.334061	0.180237	0.18349	0.289405	1.10673	1.25098	1.24754	1.14506
Carbohydrates	One-carbon Metabolism	One-carbon metabolism by tetrahydropterines	Formate--tetrahydrofolate ligase (EC 6.3.4.3)	0.476449	0.334061	0.180237	0.18349	0.289405	1.10673	1.25098	1.24754	1.14506
Carbohydrates	Central carbohydrate metabolism	Dehydrogenase complexes	Dihydrolipoamide succinyltransferase component (E2) of 2-oxoglutarate dehydrogenase complex (EC 2.3.1.61)	1.42656	1.16831	0.981114	0.630688	0.515282	1.1191	1.22485	1.48806	1.60139
Carbohydrates	Central carbohydrate metabolism	TCA Cycle	Dihydrolipoamide succinyltransferase component (E2) of 2-oxoglutarate dehydrogenase complex (EC 2.3.1.61) - #1	1.42656	1.16831	0.981114	0.630688	0.515282	1.1191	1.22485	1.48806	1.60139
Carbohydrates	Monosaccharides	L-Arabinose utilization	L-arabonate dehydratase (EC 4.2.1.25)	0.266087	0.127518	0.136353	0.0765308	0.0988212	1.1229	1.11417	1.17608	1.15222
Carbohydrates	Monosaccharides	L-fucose utilization temp	L-fuconate dehydratase (EC 4.2.1.68) - #1	0.242404	0.0871072	0.0548546	0.0627	0.0235289	1.14285	1.1778	1.1691	1.21384
Carbohydrates	Monosaccharides	L-fucose utilization	L-fuconate dehydratase (EC 4.2.1.68)	0.242404	0.0871072	0.0548546	0.0627	0.0235289	1.14285	1.1778	1.1691	1.21384
Carbohydrates	CO2 fixation	Photorespiration (oxidative C2 cycle)	Catalase (EC 1.11.1.6)	0.596258	0.396024	0.617506	0.567988	0.774099	1.14343	0.986863	1.01803	0.899757
Carbohydrates	One-carbon Metabolism	Methanogenesis	F420-dependent N(5),N(10)-methylenetetrahydromethanopterin reductase (EC 1.5.99.11)	0.303702	0.129314	0	0.00829853	0.00705866	1.15442	1.3037	1.29297	1.29456
Carbohydrates	Central carbohydrate metabolism	Pyruvate metabolism I: anaplerotic reactions, PEP	Phosphoenolpyruvate carboxykinase [GTP] (EC 4.1.1.32)	0.580934	0.320591	0.327561	0.515431	0.430578	1.19714	1.19086	1.04322	1.1051
Cell Division and Cell Cycle	Cell Division and Cell Cycle	Macromolecular synthesis operon	DNA primase (EC 2.7.7.-)	7.57612	3.28099	6.30191	5.93097	4.80375	2.0033	1.1745	1.23736	1.47769
Cell Division and Cell Cycle	Cell Division and Cell Cycle	Control of cell elongation - division cycle in Bacilli	Endonuclease III (EC 4.2.99.18)	1.06207	2.32794	1.00147	1.48955	2.57762	0.619624	1.03028	0.828289	0.576381
Cell Division and Cell Cycle	Cell Division and Cell Cycle	Macromolecular synthesis operon	Carbamoyl-phosphate synthase small chain (EC 6.3.5.5)	2.72599	4.24186	3.98144	4.45958	4.33509	0.710814	0.747974	0.682467	0.698392
Cell Division and Cell Cycle	Cell Division and Cell Cycle	Bacterial Cytoskeleton	Cell division protein FtsW	2.06514	3.24975	3.99365	1.80745	3.48565	0.721253	0.613808	1.09179	0.683322
Cell Division and Cell Cycle	Cell Division and Cell Cycle	Bacterial Cytoskeleton	Rod shape-determining protein MreD	0	0.343723	0.415242	0.326975	0.644405	0.744201	0.706593	0.753593	0.608123
Cell Division and Cell Cycle	Cell Division and Cell Cycle	Two cell division clusters relating to chromosome partitioning	Ribonuclease III (EC 3.1.26.3)	1.19188	1.79673	1.84416	2.17075	0	0.783729	0.77066	0.691281	2.19188
Cell Division and Cell Cycle	Cell Division and Cell Cycle	Two cell division clusters relating to chromosome partitioning	Segregation and condensation protein A	1.06207	1.54675	1.39228	1.32607	1.46456	0.809686	0.861969	0.886506	0.836691
Cell Division and Cell Cycle	Cell Division and Cell Cycle	Two cell division clusters relating to chromosome partitioning	Pseudouridine synthase family protein	0.413028	0.695258	0.048852	0.127157	0	0.833518	1.34721	1.25362	1.41303
Cell Division and Cell Cycle	Cell Division and Cell Cycle	Macromolecular synthesis operon	RNA polymerase sigma factor RpoD	4.29549	5.29646	5.41036	6.0218	4.45226	0.841027	0.826084	0.75415	0.971248
Cell Division and Cell Cycle	Cell Division and Cell Cycle	Cyanobacterial Circadian Clock	Circadian phase modifier	0	0.12499	0.561798	0	0.351494	0.888897	0.640288	1	0.739922
Cell Division and Cell Cycle	Cell Division and Cell Cycle	Two cell division clusters relating to chromosome partitioning	Signal recognition particle, subunit Ffh SRP54 (TC 3.A.5.1.1)	4.17748	4.78088	4.90962	3.9782	4.07147	0.895623	0.876111	1.04003	1.0209
Cell Division and Cell Cycle	Cell Division and Cell Cycle	Two cell division clusters relating to chromosome partitioning	Ribosomal large subunit pseudouridine synthase B (EC 4.2.1.70)	0.908662	1.1171	1.07474	1.48047	1.75747	0.901545	0.919951	0.769475	0.692179
Cell Division and Cell Cycle	Cell Division and Cell Cycle	Bacterial Cytoskeleton	Rod shape-determining protein RodA	1.01487	1.21865	0.671715	1.71662	4.01289	0.908149	1.20527	0.741682	0.401938
Cell Division and Cell Cycle	Cell Division and Cell Cycle	Bacterial Cytoskeleton	Cell division protein FtsQ	0.177012	0.28904	0.256473	0.481381	0	0.913092	0.936759	0.794537	1.17701
Cell Division and Cell Cycle	Cell Division and Cell Cycle	Bacterial Cytoskeleton	Cell division protein FtsK	6.23082	6.8979	4.87298	6.40327	7.58641	0.915538	1.2312	0.976707	0.842124
Cell Division and Cell Cycle	Cell Division and Cell Cycle	YgjD and YeaZ	YgjD/Kae1/Qri7 family, required for N6-threonylcarbamoyl adenosine t(6)A37 modification in tRNA - #1	2.8794	3.16382	3.06546	2.9337	3.51494	0.931693	0.954233	0.986196	0.859236
Cell Division and Cell Cycle	Cell Division and Cell Cycle	Macromolecular synthesis operon	YgjD/Kae1/Qri7 family, required for N6-threonylcarbamoyl adenosine t(6)A37 modification in tRNA	2.8794	3.16382	3.06546	2.9337	3.51494	0.931693	0.954233	0.986196	0.859236
Cell Division and Cell Cycle	Cell Division and Cell Cycle	Bacterial Cytoskeleton	Rod shape-determining protein MreB	4.92093	5.33552	4.55545	4.53224	4.51084	0.934562	1.06579	1.07026	1.07442
Cell Division and Cell Cycle	Cell Division and Cell Cycle	Bacterial Cytoskeleton	Sporulation initiation inhibitor protein Soj	2.9384	3.18725	2.79678	2.32516	3.33919	0.940569	1.0373	1.18442	0.907634
Cell Division and Cell Cycle	Cell Division and Cell Cycle	Bacterial Cytoskeleton	Chromosome (plasmid) partitioning protein ParA	3.06821	3.28099	2.97997	2.50681	3.95431	0.950295	1.02217	1.16009	0.821146
Cell Division and Cell Cycle	Cell Division and Cell Cycle	Two cell division clusters relating to chromosome partitioning	Chromosome (plasmid) partitioning protein ParA - #1	3.06821	3.28099	2.97997	2.50681	3.95431	0.950295	1.02217	1.16009	0.821146
Cell Division and Cell Cycle	Cell Division and Cell Cycle	Macromolecular synthesis operon	Carbamoyl-phosphate synthase large chain (EC 6.3.5.5)	14.0784	14.7723	11.4069	12.7702	12.3316	0.956003	1.21532	1.095	1.13103
Cell Division and Cell Cycle	Cell Division and Cell Cycle	Bacterial Cytoskeleton	Septum site-determining protein MinD	0.247817	0.28904	0.793845	0.817439	1.17165	0.96802	0.69561	0.68658	0.574595
Cell Division and Cell Cycle	Cell Division and Cell Cycle	Two cell division clusters relating to chromosome partitioning	Segregation and condensation protein B	1.56951	1.62487	1.55105	1.14441	0	0.978907	1.00723	1.19823	2.56951
Cell Division and Cell Cycle	Cell Division and Cell Cycle	Heterocyst formation in cyanobacteria	Heterocyst differentiation protein HetC	0	0	0.024426	0	0	1	0.976156	1	1
Cell Division and Cell Cycle	Cell Division and Cell Cycle	Bacterial Cytoskeleton	Cell division topological specificity factor MinE	0	0	0.085491	0	0	1	0.921242	1	1
Cell Division and Cell Cycle	Cell Division and Cell Cycle	Heterocyst formation in cyanobacteria	Nitrogen-responsive response regulator NrrA	0	0	0.12213	0	0	1	0.891162	1	1
Cell Division and Cell Cycle	Cell Division and Cell Cycle	MukBEF Chromosome Condensation	Membrane Protein Functionally coupled to the MukBEF Chromosome Partitioning Mechanism	0	0	0	0.027248	0	1	1	0.973475	1
Cell Division and Cell Cycle	Cell Division and Cell Cycle	Bacterial Cytoskeleton	Cell division protein FtsB	0	0	0	0.0363306	0	1	1	0.964943	1
Cell Division and Cell Cycle	Cell Division and Cell Cycle	Heterocyst formation in cyanobacteria	Heterocyst differentiation protein HetP	0	0	0.158769	0.127157	0	1	0.862985	0.887188	1
Cell Division and Cell Cycle	Cell Division and Cell Cycle	Heterocyst formation in cyanobacteria	Protein FraG required for filament integrity and heterocyst maturation	0	0	0.341964	0.435967	0	1	0.745177	0.696395	1
Cell Division and Cell Cycle	Cell Division and Cell Cycle	Bacterial Cytoskeleton	Rod shape-determining protein MreC	0	0	0.683928	0.699364	0	1	0.59385	0.588455	1
Cell Division and Cell Cycle	Cell Division and Cell Cycle	Cyanobacterial Circadian Clock	Circadian input kinase A	0	0	1.57548	1.11717	0	1	0.388278	0.472329	1
Cell Division and Cell Cycle	Cell Division and Cell Cycle	Bacterial Cytoskeleton	Septum formation protein Maf	0	0	0.818271	0.635786	1.90393	1	0.549973	0.611327	0.344362
Cell Division and Cell Cycle	Cell Division and Cell Cycle	Bacterial Cytoskeleton	Cell division protein FtsA	1.25089	1.24209	1.40449	2.53406	3.45636	1.00392	0.936116	0.636912	0.505095
Cell Division and Cell Cycle	Cell Division and Cell Cycle	Bacterial Cytoskeleton	Cell division protein FtsL	0.0354024	0.0156238	0	0	0.0878735	1.01947	1.0354	1.0354	0.951767
Cell Division and Cell Cycle	Cell Division and Cell Cycle	Two cell division clusters relating to chromosome partitioning	Chromosome (plasmid) partitioning protein ParB-2	0.0236016	0	0	0	0	1.0236	1.0236	1.0236	1.0236
Cell Division and Cell Cycle	Cell Division and Cell Cycle	Intracellular septation in Enterobacteria	Intracellular septation protein IspA	0.0236016	0	0	0	0.0878735	1.0236	1.0236	1.0236	0.94092
Cell Division and Cell Cycle	Cell Division and Cell Cycle	Two cell division clusters relating to chromosome partitioning	Chromosome partition protein smc	7.54071	7.32755	5.59355	5.64033	7.99649	1.0256	1.29531	1.28619	0.949339
Cell Division and Cell Cycle	Cell Division and Cell Cycle	Cyanobacterial Circadian Clock	Clock-associated two-component sensor histidine kinase SasA	0.0354024	0	0.109917	0	0	1.0354	0.932865	1.0354	1.0354
Cell Division and Cell Cycle	Cell Division and Cell Cycle	Cyanobacterial Circadian Clock	Circadian oscillation regulator KaiB	0.0354024	0	0.183195	0.118074	0.175747	1.0354	0.87509	0.926059	0.880634
Cell Division and Cell Cycle	Cell Division and Cell Cycle	Two cell division clusters relating to chromosome partitioning	Signal recognition particle receptor protein FtsY (=alpha subunit) (TC 3.A.5.1.1)	2.41916	2.21076	3.65169	3.05177	3.33919	1.06491	0.735038	0.843869	0.787973
Cell Division and Cell Cycle	Cell Division and Cell Cycle	Cyanobacterial Circadian Clock	Light dependent period modulator LdpA	0.0826056	0	0	0	0	1.08261	1.08261	1.08261	1.08261
Cell Division and Cell Cycle	Cell Division and Cell Cycle	Cyanobacterial Circadian Clock	Circadian clock protein KaiA	0.0826056	0	0.061065	0	0	1.08261	1.0203	1.08261	1.08261
Cell Division and Cell Cycle	Cell Division and Cell Cycle	Macromolecular synthesis operon	Transamidase GatB domain protein	0.507435	0.335911	0.659502	0.481381	1.28881	1.12839	0.908366	1.01759	0.65861
Cell Division and Cell Cycle	Cell Division and Cell Cycle	Heterocyst formation in cyanobacteria	Global nitrogen regulatory protein, CRP family of transcriptional regulators	0.129809	0	0	0	0	1.12981	1.12981	1.12981	1.12981
Cell Division and Cell Cycle	Cell Division and Cell Cycle	Bacterial Cytoskeleton	Cell division protein FtsZ (EC 3.4.24.-)	5.09795	4.25748	3.50513	3.36058	4.54013	1.15986	1.35356	1.39843	1.10069
Cell Division and Cell Cycle	Cell Division and Cell Cycle	Bacterial Cytoskeleton	Cell division protein FtsI [Peptidoglycan synthetase] (EC 2.4.1.129)	4.15388	3.28881	3.83488	4.28701	0	1.20171	1.06598	0.97482	5.15388
Cell Division and Cell Cycle	Cell Division and Cell Cycle	Bacterial Cytoskeleton	Stage 0 sporulation protein J	2.37196	1.73424	1.28236	1.74387	0	1.23324	1.4774	1.22891	3.37196
Cell Division and Cell Cycle	Cell Division and Cell Cycle	Bacterial Cytoskeleton	Chromosome (plasmid) partitioning protein ParB	2.41916	1.75768	1.58769	1.78928	0	1.23987	1.32132	1.22582	3.41916
Cell Division and Cell Cycle	Cell Division and Cell Cycle	Two cell division clusters relating to chromosome partitioning	Chromosome (plasmid) partitioning protein ParB - #1	2.41916	1.75768	1.58769	1.78928	0	1.23987	1.32132	1.22582	3.41916
Cell Division and Cell Cycle	Cell Division and Cell Cycle	Cyanobacterial Circadian Clock	Circadian clock protein KaiC	0.306821	0.0390594	0.378603	0.27248	0	1.2577	0.947931	1.02699	1.30682
Cell Division and Cell Cycle	Cell Division and Cell Cycle	Cyanobacterial Circadian Clock	Group 2 RNA polymerase sigma factor	0.29502	0	0.61065	0.336058	0	1.29502	0.804036	0.969284	1.29502
Cell Division and Cell Cycle	Cell Division and Cell Cycle	Bacterial Cytoskeleton	MreB-like protein (Mbl protein)	0.306821	0	0	0	0.117165	1.30682	1.30682	1.30682	1.16977
Cell Division and Cell Cycle	Cell Division and Cell Cycle	Macromolecular synthesis operon	SSU ribosomal protein S21p	0.554638	0.156238	0.647289	0.472298	0.410076	1.34457	0.943755	1.05593	1.10252
Cell Division and Cell Cycle	Cell Division and Cell Cycle	Bacterial Cytoskeleton	Cell division protein MraZ	1.35709	0.570268	1.16023	0.853769	0.76157	1.50108	1.09113	1.27151	1.33806
Cell Wall and Capsule	Gram-Positive cell wall components	Teichoic and lipoteichoic acids biosynthesis	Undecaprenyl-phosphate N-acetylglucosaminyl 1-phosphate transferase (EC 2.7.8.-)	0	1.00611	0	0.305539	0	0.498476	1	0.765967	1
Cell Wall and Capsule	Cell Wall and Capsule	Peptidoglycan Biosynthesis	UDP-N-acetylmuramoylalanine--D-glutamate ligase (EC 6.3.2.9)	0.687363	1.41141	0	1.06661	0.874282	0.699743	1.68736	0.816489	0.900272
Cell Wall and Capsule	Cell Wall and Capsule	Peptidoglycan biosynthesis--gjo	UDP-N-acetylmuramoylalanine--D-glutamate ligase (EC 6.3.2.9) - #1	0.687363	1.41141	0	1.06661	0.874282	0.699743	1.68736	0.816489	0.900272
Cell Wall and Capsule	Capsular and extracellular polysacchrides	Alginate metabolism	Mannose-6-phosphate isomerase (EC 5.3.1.8) - #2	0	0.39818	0.719954	0.416644	0.79333	0.715216	0.581411	0.705894	0.557622
Cell Wall and Capsule	Gram-Negative cell wall components	Lipopolysaccharide assembly	Survival protein SurA precursor (Peptidyl-prolyl cis-trans isomerase SurA) (EC 5.2.1.8)	0	0.259528	0	0.32776	0.558569	0.793948	1	0.753148	0.641614
Cell Wall and Capsule	Gram-Negative cell wall components	Outer membrane	Outer membrane protein assembly factor YaeT precursor - #1	0.281706	0.61149	0.472962	0.766624	0.874282	0.795354	0.870155	0.725511	0.683839
Cell Wall and Capsule	Gram-Negative cell wall components	Lipopolysaccharide assembly	Outer membrane protein assembly factor YaeT precursor	0.281706	0.61149	0.472962	0.766624	0.874282	0.795354	0.870155	0.725511	0.683839
Cell Wall and Capsule	Gram-Negative cell wall components	KDO2-Lipid A biosynthesis	3-deoxy-manno-octulosonate cytidylyltransferase (EC 2.7.7.38)	0	0.255973	0	0.336092	0.412855	0.796196	1	0.748451	0.707787
Cell Wall and Capsule	Gram-Negative cell wall components	Lipopolysaccharide-related cluster in Alphaproteobacteria	Tetraacyldisaccharide 4'-kinase (EC 2.7.1.130) - #1	0	0.245307	0.315308	0	0	0.803015	0.760278	1	1
Cell Wall and Capsule	Gram-Negative cell wall components	KDO2-Lipid A biosynthesis	Tetraacyldisaccharide 4'-kinase (EC 2.7.1.130)	0	0.245307	0.315308	0	0	0.803015	0.760278	1	1
Cell Wall and Capsule	Gram-Negative cell wall components	LOS core oligosaccharide biosynthesis	D-glycero-beta-D-manno-heptose 7-phosphate kinase	0	0.19909	0	0.419421	0	0.833966	1	0.704513	1
Cell Wall and Capsule	Gram-Negative cell wall components	LOS core oligosaccharide biosynthesis	ADP-heptose synthase (EC 2.7.-.-)	0	0.19909	0	0.419421	0	0.833966	1	0.704513	1
Cell Wall and Capsule	Cell Wall and Capsule	Peptidoglycan Biosynthesis	Glutamine synthetase type III, GlnN (EC 6.3.1.2) - #2	0.343681	0.59727	0.199695	0.538859	0.437141	0.841236	1.12002	0.873167	0.934968
Cell Wall and Capsule	Cell Wall and Capsule	Peptidoglycan Biosynthesis	UDP-N-acetylmuramoylalanyl-D-glutamyl-2,6-diaminopimelate--D-alanyl-D-alanine ligase (EC 6.3.2.10)	0.721167	1.031	0.704188	0.933281	0	0.847448	1.00996	0.890283	1.72117
Cell Wall and Capsule	Cell Wall and Capsule	Peptidoglycan biosynthesis--gjo	UDP-N-acetylmuramoylalanyl-D-glutamyl-2,6-diaminopimelate--D-alanyl-D-alanine ligase (EC 6.3.2.10) - #1	0.721167	1.031	0.704188	0.933281	0	0.847448	1.00996	0.890283	1.72117
Cell Wall and Capsule	Cell Wall and Capsule	Peptidoglycan Biosynthesis	Phospho-N-acetylmuramoyl-pentapeptide-transferase (EC 2.7.8.13)	1.70714	2.17577	1.62384	1.22771	0.841901	0.852436	1.03175	1.21521	1.46975
Cell Wall and Capsule	Gram-Negative cell wall components	LOS core oligosaccharide biosynthesis	Phosphoheptose isomerase (EC 5.3.1.-) - #1	0.140853	0.319966	0.236481	0.219432	0.153809	0.864305	0.922661	0.935561	0.988771
Cell Wall and Capsule	Capsular and extracellular polysacchrides	Capsular heptose biosynthesis	Phosphoheptose isomerase (EC 5.3.1.-)	0.140853	0.319966	0.236481	0.219432	0.153809	0.864305	0.922661	0.935561	0.988771
Cell Wall and Capsule	Cell Wall and Capsule	Recycling of Peptidoglycan Amino Sugars	Anhydro-N-acetylmuramic acid kinase (EC 2.7.1.-)	0	0.156428	0.39939	0.380534	0.615235	0.864732	0.714597	0.724357	0.619105
Cell Wall and Capsule	Cell Wall and Capsule	Peptidoglycan Biosynthesis	Multimodular transpeptidase-transglycosylase (EC 2.4.1.129) (EC 3.4.-.-)	0.907093	1.2052	1.47144	1.36937	1.50571	0.864815	0.771653	0.804895	0.7611
Cell Wall and Capsule	Capsular and extracellular polysacchrides	Sialic Acid Metabolism	N-acetylglucosamine-1-phosphate uridyltransferase (EC 2.7.7.23) - #2	1.1719	1.51095	1.28225	0.627743	1.44904	0.86497	0.951646	1.3343	0.886836
Cell Wall and Capsule	Cell Wall and Capsule	UDP-N-acetylmuramate from Fructose-6-phosphate Biosynthesis	N-acetylglucosamine-1-phosphate uridyltransferase (EC 2.7.7.23) - #1	1.1719	1.51095	1.28225	0.627743	1.44904	0.86497	0.951646	1.3343	0.886836
Cell Wall and Capsule	Cell Wall and Capsule	Peptidoglycan Biosynthesis	N-acetylglucosamine-1-phosphate uridyltransferase (EC 2.7.7.23)	1.1719	1.51095	1.28225	0.627743	1.44904	0.86497	0.951646	1.3343	0.886836
Cell Wall and Capsule	Cell Wall and Capsule	UDP-N-acetylmuramate from Fructose-6-phosphate Biosynthesis	Glucosamine-1-phosphate N-acetyltransferase (EC 2.3.1.157) - #1	1.1719	1.50028	1.32429	0.799956	1.44904	0.86866	0.934433	1.20664	0.886836
Cell Wall and Capsule	Capsular and extracellular polysacchrides	Sialic Acid Metabolism	Glucosamine-1-phosphate N-acetyltransferase (EC 2.3.1.157) - #2	1.1719	1.50028	1.32429	0.799956	1.44904	0.86866	0.934433	1.20664	0.886836
Cell Wall and Capsule	Cell Wall and Capsule	Peptidoglycan Biosynthesis	Glucosamine-1-phosphate N-acetyltransferase (EC 2.3.1.157)	1.1719	1.50028	1.32429	0.799956	1.44904	0.86866	0.934433	1.20664	0.886836
Cell Wall and Capsule	Gram-Negative cell wall components	KDO2-Lipid A biosynthesis	Arabinose 5-phosphate isomerase (EC 5.3.1.13)	0.276072	0.462173	0.656892	0.419421	0.720473	0.872723	0.77016	0.899009	0.741698
Cell Wall and Capsule	Gram-Negative cell wall components	Perosamine Synthesis Vibrio	O-antigen export system, permease protein	0	0.145762	0.630616	0.369424	0.20238	0.872781	0.613265	0.730234	0.831684
Cell Wall and Capsule	Capsular and extracellular polysacchrides	Alginate metabolism	Phosphomannomutase (EC 5.4.2.8) - #1	2.27055	2.7126	2.03374	1.13605	1.44904	0.880933	1.07806	1.53112	1.33544
Cell Wall and Capsule	Gram-Negative cell wall components	Perosamine Synthesis Vibrio	Phosphomannomutase (EC 5.4.2.8) - #2	2.27055	2.7126	2.03374	1.13605	1.44904	0.880933	1.07806	1.53112	1.33544
Cell Wall and Capsule	Capsular and extracellular polysacchrides	dTDP-rhamnose synthesis	Glucose-1-phosphate thymidylyltransferase (EC 2.7.7.24) - #1	0.963435	1.21587	1.2297	1.40548	1.53809	0.886078	0.880582	0.816235	0.773588
Cell Wall and Capsule	Capsular and extracellular polysacchrides	Rhamnose containing glycans	Glucose-1-phosphate thymidylyltransferase (EC 2.7.7.24)	0.963435	1.21587	1.2297	1.40548	1.53809	0.886078	0.880582	0.816235	0.773588
Cell Wall and Capsule	Cell Wall and Capsule	YjeE	ATPase YjeE, predicted to have essential role in cell wall biosynthesis	0	0.124431	0.220716	0.141659	0	0.889339	0.819192	0.875918	1
Cell Wall and Capsule	Gram-Negative cell wall components	Vibrio Core Oligosaccharide Biosynthesis	3-deoxy-D-manno-octulosonic-acid transferase (EC 2.-.-.-) - #3	0	0.124431	0	0.177768	0	0.889339	1	0.849064	1
Cell Wall and Capsule	Gram-Negative cell wall components	Lipopolysaccharide-related cluster in Alphaproteobacteria	3-deoxy-D-manno-octulosonic-acid transferase (EC 2.-.-.-) - #2	0	0.124431	0	0.177768	0	0.889339	1	0.849064	1
Cell Wall and Capsule	Gram-Negative cell wall components	LOS core oligosaccharide biosynthesis	3-deoxy-D-manno-octulosonic-acid transferase (EC 2.-.-.-) - #1	0	0.124431	0	0.177768	0	0.889339	1	0.849064	1
Cell Wall and Capsule	Gram-Negative cell wall components	KDO2-Lipid A biosynthesis	3-deoxy-D-manno-octulosonic-acid transferase (EC 2.-.-.-)	0	0.124431	0	0.177768	0	0.889339	1	0.849064	1
Cell Wall and Capsule	Gram-Negative cell wall components	LOS core oligosaccharide biosynthesis	ADP-heptose--lipooligosaccharide heptosyltransferase II (EC 2.4.1.-)	0	0.124431	0.483473	0.422199	0.663806	0.889339	0.674094	0.703137	0.601031
Cell Wall and Capsule	Gram-Negative cell wall components	Vibrio Core Oligosaccharide Biosynthesis	ADP-heptose--lipooligosaccharide heptosyltransferase II (EC 2.4.1.-) - #1	0	0.124431	0.483473	0.422199	0.663806	0.889339	0.674094	0.703137	0.601031
Cell Wall and Capsule	Gram-Negative cell wall components	KDO2-Lipid A biosynthesis	UDP-3-O-[3-hydroxymyristoyl] glucosamine N-acyltransferase (EC 2.3.1.-)	0.433827	0.61149	0.483473	0.730515	0.882377	0.889752	0.966534	0.828555	0.761711
Cell Wall and Capsule	Gram-Negative cell wall components	KDO2-Lipid A biosynthesis	Acyl-[acyl-carrier-protein]--UDP-N-acetylglucosamine O-acyltransferase (EC 2.3.1.129)	0.416925	0.590159	0.504493	0.830509	0.429046	0.891058	0.941796	0.77406	0.991518
Cell Wall and Capsule	Capsular and extracellular polysacchrides	Alginate metabolism	Hexuronate transporter - #1	0.0281706	0.149317	0.0157654	0.0694406	0	0.894592	1.01221	0.96141	1.02817
Cell Wall and Capsule	Cell Wall and Capsule	Peptidoglycan Biosynthesis	Penicillin-binding protein 2 (PBP-2)	0.490168	0.664818	0.36786	0.538859	0	0.895094	1.08942	0.968359	1.49017
Cell Wall and Capsule	Capsular and extracellular polysacchrides	Capsular Polysaccharides Biosynthesis and Assembly	Oxidoreductase, short-chain dehydrogenase/reductase family (EC 1.1.1.-)	0	0.113766	0	0.161102	0	0.897855	1	0.861251	1
Cell Wall and Capsule	Gram-Negative cell wall components	Lipopolysaccharide-related cluster in Alphaproteobacteria	Lipid A export ATP-binding/permease protein MsbA (EC 3.6.3.25) - #1	0.411291	0.551052	0.357349	0.480529	0.930948	0.909892	1.03974	0.953234	0.73088
Cell Wall and Capsule	Gram-Negative cell wall components	KDO2-Lipid A biosynthesis	Lipid A export ATP-binding/permease protein MsbA (EC 3.6.3.25)	0.411291	0.551052	0.357349	0.480529	0.930948	0.909892	1.03974	0.953234	0.73088
Cell Wall and Capsule	Gram-Negative cell wall components	Lipid A-Ara4N pathway ( Polymyxin resistance )	Polymyxin resistance protein PmrJ, predicted deacetylase	0.0507071	0.152873	0.105103	0.0638853	0.121428	0.911382	0.950778	0.987613	0.936937
Cell Wall and Capsule	Capsular and extracellular polysacchrides	Sialic Acid Metabolism	N-acylglucosamine 2-epimerase (EC 5.1.3.8)	0	0.0959898	0.0315308	0.022221	0	0.912417	0.969433	0.978262	1
Cell Wall and Capsule	Cell Wall and Capsule	Peptidoglycan Biosynthesis	Monofunctional biosynthetic peptidoglycan transglycosylase (EC 2.4.2.-)	0.118317	0.213311	0.199695	0.302761	0.259046	0.921707	0.932167	0.85842	0.888225
Cell Wall and Capsule	Gram-Negative cell wall components	Lipopolysaccharide assembly	Probable component of the lipoprotein assembly complex (forms a complex with YaeT, YfgL, and NlpB)	0.107048	0.19909	0.0788271	0.0999944	0.105238	0.92324	1.02616	1.00641	1.00164
Cell Wall and Capsule	Gram-Negative cell wall components	Major Outer Membrane Proteins	Outer membrane protein A precursor	0	0.0817691	0	0.194434	0.234761	0.924412	1	0.837217	0.809873
Cell Wall and Capsule	Gram-Negative cell wall components	Outer membrane	Outer membrane protein A precursor - #1	0	0.0817691	0	0.194434	0.234761	0.924412	1	0.837217	0.809873
Cell Wall and Capsule	Gram-Negative cell wall components	Lipopolysaccharide assembly	Lipoprotein releasing system transmembrane protein LolC	0	0.0817691	0.0840822	0.138881	0.437141	0.924412	0.922439	0.878055	0.695826
Cell Wall and Capsule	Gram-Negative cell wall components	Lipoprotein sorting system	Lipoprotein releasing system transmembrane protein LolC - #1	0	0.0817691	0.0840822	0.138881	0.437141	0.924412	0.922439	0.878055	0.695826
Cell Wall and Capsule	Cell wall of Mycobacteria	mycolic acid synthesis	Enoyl-[acyl-carrier-protein] reductase [NADH] (EC 1.3.1.9)	1.1888	1.3403	0.641127	0.872174	0.99571	0.935264	1.33372	1.16912	1.09675
Cell Wall and Capsule	Gram-Negative cell wall components	Lipid A modifications	Sensor protein basS/pmrB (EC 2.7.3.-)	0	0.060438	0.036786	0.130548	0	0.943007	0.964519	0.884527	1
Cell Wall and Capsule	Capsular and extracellular polysacchrides	Sialic Acid Metabolism	N-acetylneuraminate lyase (EC 4.1.3.3)	0	0.0568828	0	0	0	0.946179	1	1	1
Cell Wall and Capsule	Cell wall of Mycobacteria	mycolic acid synthesis	3-oxoacyl-[acyl-carrier protein] reductase (EC 1.1.1.100)	1.52685	1.65316	1.16664	1.41937	0	0.952392	1.16625	1.04443	2.52685
Cell Wall and Capsule	Cell Wall and Capsule	Peptidoglycan Biosynthesis	Rod shape-determining protein RodA - #1	0.484534	0.554608	0.289033	0.524971	1.10904	0.954925	1.15167	0.973484	0.70389
Cell Wall and Capsule	Cell Wall and Capsule	Recycling of Peptidoglycan Amino Acids	UDP-N-acetylmuramate:L-alanyl-gamma-D-glutamyl-meso-diaminopimelate ligase (EC 6.3.2.-) - #1	0.371852	0.433732	0.541279	0.586079	0.396665	0.95684	0.890074	0.864933	0.982234
Cell Wall and Capsule	Cell Wall and Capsule	Peptidoglycan biosynthesis--gjo	UDP-N-acetylmuramate:L-alanyl-gamma-D-glutamyl-meso-diaminopimelate ligase (EC 6.3.2.-)	0.371852	0.433732	0.541279	0.586079	0.396665	0.95684	0.890074	0.864933	0.982234
Cell Wall and Capsule	Capsular and extracellular polysacchrides	Legionaminic Acid Biosynthesis	UDP-N-acetylglucosamine 4,6-dehydratase (EC 4.2.1.-)	0.298608	0.355518	0.18393	0.274985	0	0.958017	1.09686	1.01853	1.29861
Cell Wall and Capsule	Gram-Negative cell wall components	Vibrio Core Oligosaccharide Biosynthesis	transferase, hexapeptide repeat family	0	0.0391069	0	0.0111105	0	0.962365	1	0.989012	1
Cell Wall and Capsule	Capsular and extracellular polysacchrides	Vibrio Polysaccharide (VPS) Biosynthesis	UDP-N-acetyl-D-mannosaminuronate dehydrogenase	0.0507071	0.0888794	0.0262757	0.0249986	0	0.964943	1.02381	1.02508	1.05071
Cell Wall and Capsule	Cell wall of Mycobacteria	mycolic acid synthesis	Malonyl CoA-acyl carrier protein transacylase (EC 2.3.1.39)	0.822582	0.888794	0.725209	0.933281	0.752854	0.964945	1.05644	0.94274	1.03978
Cell Wall and Capsule	Cell Wall and Capsule	Peptidoglycan Biosynthesis	Murein-DD-endopeptidase (EC 3.4.99.-)	0.112682	0.152873	0.262757	0.0972168	0.113333	0.965139	0.881153	1.0141	0.999416
Cell Wall and Capsule	Cell Wall and Capsule	Peptidoglycan Biosynthesis	UDP-N-acetylmuramate--alanine ligase (EC 6.3.2.8)	1.62263	1.71715	1.30853	0.908283	1.18999	0.965212	1.13606	1.37434	1.19755
Cell Wall and Capsule	Cell Wall and Capsule	Peptidoglycan biosynthesis--gjo	UDP-N-acetylmuramate--alanine ligase (EC 6.3.2.8) - #1	1.62263	1.71715	1.30853	0.908283	1.18999	0.965212	1.13606	1.37434	1.19755
Cell Wall and Capsule	Gram-Negative cell wall components	Lipopolysaccharide assembly	LPS-assembly lipoprotein RlpB precursor (Rare lipoprotein B) - #1	0	0.0355518	0	0	0	0.965669	1	1	1
Cell Wall and Capsule	Gram-Negative cell wall components	KDO2-Lipid A biosynthesis	LPS-assembly lipoprotein RlpB precursor (Rare lipoprotein B)	0	0.0355518	0	0	0	0.965669	1	1	1
Cell Wall and Capsule	Gram-Positive cell wall components	Teichoic and lipoteichoic acids biosynthesis	CDP-glycerol: N-acetyl-beta-D-mannosaminyl-1,4-N-acetyl-D-glucosaminyldiphosphoundecaprenyl glycerophosphotransferase	0	0.0319966	0	0	0	0.968995	1	1	1
Cell Wall and Capsule	Capsular and extracellular polysacchrides	Sialic Acid Metabolism	Sialic acid utilization regulator, RpiR family	0	0.0319966	0	0	0	0.968995	1	1	1
Cell Wall and Capsule	Gram-Negative cell wall components	Lipopolysaccharide assembly	Outer membrane lipoprotein SmpA, a component of the essential YaeT outer-membrane protein assembly complex	0	0.0319966	0.0105103	0.0583301	0.113333	0.968995	0.989599	0.944885	0.898204
Cell Wall and Capsule	Gram-Negative cell wall components	Lipid A-Ara4N pathway ( Polymyxin resistance )	Polymyxin resistance protein ArnC, glycosyl transferase (EC 2.4.-.-)	0.0901459	0.124431	0.0998476	0	0.323808	0.969509	0.991179	1.09015	0.823492
Cell Wall and Capsule	Cell Wall and Capsule	Peptidoglycan Biosynthesis	D-alanyl-D-alanine carboxypeptidase (EC 3.4.16.4) - #1	0.298608	0.337742	1.03001	0.597189	0	0.970747	0.639706	0.813059	1.29861
Cell Wall and Capsule	Cell Wall and Capsule	Murein Hydrolases	D-alanyl-D-alanine carboxypeptidase (EC 3.4.16.4)	0.298608	0.337742	1.03001	0.597189	0	0.970747	0.639706	0.813059	1.29861
Cell Wall and Capsule	Gram-Negative cell wall components	Vibrio Core Oligosaccharide Biosynthesis	Lipopolysaccharide heptosyltransferase I (EC 2.4.1.-) - #1	0	0.0284414	0	0	0	0.972345	1	1	1
Cell Wall and Capsule	Gram-Negative cell wall components	LOS core oligosaccharide biosynthesis	Lipopolysaccharide heptosyltransferase I (EC 2.4.1.-)	0	0.0284414	0	0	0	0.972345	1	1	1
Cell Wall and Capsule	Cell Wall and Capsule	Peptidoglycan Biosynthesis	Glutamine synthetase type I (EC 6.3.1.2) - #2	2.63113	2.73393	1.97068	1.40826	2.46094	0.97247	1.22233	1.50779	1.04918
Cell Wall and Capsule	Capsular and extracellular polysacchrides	CMP-N-acetylneuraminate Biosynthesis	UDP-N-acetylglucosamine 2-epimerase (EC 5.1.3.14)	0.343681	0.380404	0.231226	0.433309	0	0.973397	1.09134	0.937468	1.34368
Cell Wall and Capsule	Capsular and extracellular polysacchrides	Legionaminic Acid Biosynthesis	UDP-N-acetylglucosamine 2-epimerase (EC 5.1.3.14) - #1	0.343681	0.380404	0.231226	0.433309	0	0.973397	1.09134	0.937468	1.34368
Cell Wall and Capsule	Capsular and extracellular polysacchrides	Vibrio Polysaccharide (VPS) Biosynthesis	UDP-N-acetylglucosamine 2-epimerase (EC 5.1.3.14) - #3	0.343681	0.380404	0.231226	0.433309	0	0.973397	1.09134	0.937468	1.34368
Cell Wall and Capsule	Capsular and extracellular polysacchrides	Sialic Acid Metabolism	UDP-N-acetylglucosamine 2-epimerase (EC 5.1.3.14) - #2	0.343681	0.380404	0.231226	0.433309	0	0.973397	1.09134	0.937468	1.34368
Cell Wall and Capsule	Cell Wall and Capsule	tRNA-dependent amino acid transfers	tRNA-dependent lipid II--amino acid ligase	0	0.0248862	0	0.0361091	0	0.975718	1	0.965149	1
Cell Wall and Capsule	Capsular and extracellular polysacchrides	Legionaminic Acid Biosynthesis	UDP-Bac2Ac4Ac hydrolyzing 2-epimerase NeuC homolog	0	0.0248862	0	0	0.0242856	0.975718	1	1	0.97629
Cell Wall and Capsule	Gram-Negative cell wall components	LOS core oligosaccharide biosynthesis	Lipopolysaccharide heptosyltransferase III (EC 2.4.1.-)	0	0.0248862	0.0735719	0.0305539	0.145714	0.975718	0.93147	0.970352	0.872818
Cell Wall and Capsule	Cell Wall and Capsule	Recycling of Peptidoglycan Amino Acids	N-acetylmuramoyl-L-alanine amidase (EC 3.5.1.28) AmpD	0.0676094	0.0924346	0.0525514	0.130548	0.0971424	0.977275	1.01431	0.944329	0.973082
Cell Wall and Capsule	Capsular and extracellular polysacchrides	Sialic Acid Metabolism	Phosphoglucosamine mutase (EC 5.4.2.10) - #1	1.93814	1.99445	1.67113	1.55269	1.48952	0.981193	1.09996	1.151	1.1802
Cell Wall and Capsule	Cell Wall and Capsule	UDP-N-acetylmuramate from Fructose-6-phosphate Biosynthesis	Phosphoglucosamine mutase (EC 5.4.2.10)	1.93814	1.99445	1.67113	1.55269	1.48952	0.981193	1.09996	1.151	1.1802
Cell Wall and Capsule	Gram-Positive cell wall components	Teichoic and lipoteichoic acids biosynthesis	Putative polyribitolphosphotransferase	0	0.0177759	0	0	0	0.982535	1	1	1
Cell Wall and Capsule	Capsular and extracellular polysacchrides	Rhamnose containing glycans	capsular polysaccharide biosynthesis protein	0	0.0177759	0.0525514	0.0777735	0.113333	0.982535	0.950072	0.927839	0.898204
Cell Wall and Capsule	Gram-Negative cell wall components	Vibrio Core Oligosaccharide Biosynthesis	capsular polysaccharide biosynthesis protein - #1	0	0.0177759	0.0525514	0.0777735	0.113333	0.982535	0.950072	0.927839	0.898204
Cell Wall and Capsule	Gram-Negative cell wall components	KDO2-Lipid A biosynthesis	3-deoxy-D-manno-octulosonate 8-phosphate phosphatase (EC 3.1.3.45)	0.135219	0.152873	0.189185	0.205544	0	0.984687	0.954619	0.941665	1.13522
Cell Wall and Capsule	Gram-Negative cell wall components	Lipopolysaccharide assembly	Outer membrane protein NlpB, lipoprotein component of the protein assembly complex (forms a complex with YaeT, YfiO, and YfgL)	0.129585	0.145762	0.0998476	0.172213	0.18619	0.985881	1.02704	0.963635	0.95228
Cell Wall and Capsule	Capsular and extracellular polysacchrides	Pseudaminic Acid Biosynthesis	UDP-GlcNAc-specific C4,6 dehydratase/C5 epimerase (PseB, first step of pseudaminic acid biosynthesis)	0	0.0142207	0	0	0	0.985979	1	1	1
Cell Wall and Capsule	Gram-Negative cell wall components	Vibrio Core Oligosaccharide Biosynthesis	Lipopolysaccharide biosynthesis glycosyltransferase	0	0.0142207	0.0210205	0	0	0.985979	0.979412	1	1
Cell Wall and Capsule	Gram-Negative cell wall components	Lipid A modifications	Fe(2+)/alpha-ketoglutarate-dependent dioxygenase LpxO	0	0.0142207	0.0157654	0.0138881	0.234761	0.985979	0.984479	0.986302	0.809873
Cell Wall and Capsule	Cell Wall and Capsule	Peptidoglycan biosynthesis--gjo	D-alanine--D-alanine ligase (EC 6.3.2.4) - #1	0.997239	1.02034	0.783015	0.697183	1.30333	0.988568	1.12015	1.1768	0.867111
Cell Wall and Capsule	Cell Wall and Capsule	Peptidoglycan Biosynthesis	D-alanine--D-alanine ligase (EC 6.3.2.4)	0.997239	1.02034	0.783015	0.697183	1.30333	0.988568	1.12015	1.1768	0.867111
Cell Wall and Capsule	Cell Wall and Capsule	YjeE	COG3178: Predicted phosphotransferase related to Ser/Thr protein kinases	0.101414	0.113766	0.283777	0.216655	0.412855	0.98891	0.857948	0.905281	0.779566
Cell Wall and Capsule	Gram-Positive cell wall components	Teichoic and lipoteichoic acids biosynthesis	Putative CDP-glycerol:glycerophosphate glycerophosphotransferase (EC 2.7.8.-)	0	0.0106655	0.0105103	0.0194434	0	0.989447	0.989599	0.980927	1
Cell Wall and Capsule	Capsular and extracellular polysacchrides	Sialic Acid Metabolism	Glucosamine-6-phosphate deaminase (EC 3.5.99.6) - #1	0.208462	0.220421	0.199695	0.286095	0	0.990201	1.00731	0.939637	1.20846
Cell Wall and Capsule	Gram-Negative cell wall components	LOS core oligosaccharide biosynthesis	Putative two-domain glycosyltransferase	0.0507071	0.060438	0.0525514	0	0.0728568	0.990824	0.998248	1.05071	0.979354
Cell Wall and Capsule	Gram-Negative cell wall components	Lipopolysaccharide-related cluster in Alphaproteobacteria	TldE/PmbA protein, part of proposed TldE/TldD proteolytic complex (PMID 12029038)	0.371852	0.383959	0.451942	0.588856	0.704282	0.991252	0.944839	0.863421	0.804944
Cell Wall and Capsule	Gram-Negative cell wall components	Lipopolysaccharide assembly	Outer membrane lipoprotein carrier protein LolA	0	0.00711035	0	0	0	0.99294	1	1	1
Cell Wall and Capsule	Gram-Negative cell wall components	Lipoprotein sorting system	Outer membrane lipoprotein carrier protein LolA - #1	0	0.00711035	0	0	0	0.99294	1	1	1
Cell Wall and Capsule	Capsular and extracellular polysacchrides	Sialic Acid Metabolism	N-acetylmannosamine-6-phosphate 2-epimerase (EC 5.1.3.9)	0	0.00711035	0.0525514	0.0694406	0	0.99294	0.950072	0.935068	1
Cell Wall and Capsule	Capsular and extracellular polysacchrides	Serotype determining Capsular polysaccharide biosynthesis in Staphylococcus	Capsular polysaccharide synthesis enzyme Cap8E	0	0.00355518	0	0	0	0.996457	1	1	1
Cell Wall and Capsule	Capsular and extracellular polysacchrides	Sialic Acid Metabolism	TRAP-type transport system, small permease component, predicted N-acetylneuraminate transporter	0	0.00355518	0.0262757	0.0638853	0.0323808	0.996457	0.974397	0.939951	0.968635
Cell Wall and Capsule	Gram-Negative cell wall components	Lipopolysaccharide assembly	Uncharacterized ABC transporter, ATP-binding protein YrbF	0.09578	0.0959898	0.136634	0.0333315	0.0242856	0.999809	0.964057	1.06043	1.0698
Cell Wall and Capsule	Capsular and extracellular polysacchrides	Capsular Polysaccharide (CPS) of Campylobacter	Capsular polysaccharide export system protein KpsF	0	0	0.0105103	0	0	1	0.989599	1	1
Cell Wall and Capsule	Capsular and extracellular polysacchrides	Xanthan Exopolysaccharide Biosynthesis and Export	Xanthan biosynthesis glycosyltransferase GumD	0	0	0.0157654	0	0	1	0.984479	1	1
Cell Wall and Capsule	Capsular and extracellular polysacchrides	Exopolysaccharide Biosynthesis	Tyrosine-protein kinase transmembrane modulator EpsC	0	0	0.0262757	0	0	1	0.974397	1	1
Cell Wall and Capsule	Capsular and extracellular polysacchrides	Extracellular Polysaccharide Biosynthesis of Streptococci	Tyrosine-protein kinase transmembrane modulator EpsC - #1	0	0	0.0262757	0	0	1	0.974397	1	1
Cell Wall and Capsule	Cell wall of Mycobacteria	mycolic acid synthesis	PHENOLPTHIOCEROL SYNTHESIS TYPE-I POLYKETIDE SYNTHASE PPSC	0	0	0.0315308	0	0	1	0.969433	1	1
Cell Wall and Capsule	Capsular and extracellular polysacchrides	dTDP-rhamnose synthesis	dTDP-Rha:A-D-GlcNAc-diphosphoryl polyprenol, A-3-L-rhamnosyl transferase WbbL	0	0	0.036786	0	0	1	0.964519	1	1
Cell Wall and Capsule	Cell Wall and Capsule	Peptidoglycan biosynthesis--gjo	D-alanine--D-alanine ligase B (EC 6.3.2.4) - #1	0	0	0.0735719	0	0	1	0.93147	1	1
Cell Wall and Capsule	Cell Wall and Capsule	Peptidoglycan Biosynthesis	D-alanine--D-alanine ligase B (EC 6.3.2.4)	0	0	0.0735719	0	0	1	0.93147	1	1
Cell Wall and Capsule	Capsular and extracellular polysacchrides	Exopolysaccharide Biosynthesis	Glycosyl transferase, group 1 family protein	0	0	0.0840822	0	0	1	0.922439	1	1
Cell Wall and Capsule	Gram-Positive cell wall components	Teichoic and lipoteichoic acids biosynthesis	Poly(glycerol-phosphate) alpha-glucosyltransferase (EC 2.4.1.52)	0	0	0.141889	0	0	1	0.875742	1	1
Cell Wall and Capsule	Capsular and extracellular polysacchrides	Rhamnose containing glycans	Capsular polysaccharide biosynthesis/export periplasmic protein WcbA - #1	0	0	0	0.00277762	0	1	1	0.99723	1
Cell Wall and Capsule	Capsular and extracellular polysacchrides	Capsular Polysaccharide (CPS) of Campylobacter	Capsular polysaccharide ABC transporter, ATP-binding protein KpsT	0	0	0	0.00277762	0	1	1	0.99723	1
Cell Wall and Capsule	Capsular and extracellular polysacchrides	Capsular Polysaccharides Biosynthesis and Assembly	Capsular polysaccharide glycosyltransferase biosynthesis protein WcbB	0	0	0	0.00277762	0	1	1	0.99723	1
Cell Wall and Capsule	Capsular and extracellular polysacchrides	Serotype determining Capsular polysaccharide biosynthesis in Staphylococcus	Capsular polysaccharide synthesis enzyme Cap8M	0	0	0	0.00277762	0	1	1	0.99723	1
Cell Wall and Capsule	Capsular and extracellular polysacchrides	Capsular Polysaccharides Biosynthesis and Assembly	Capsular polysaccharide biosynthesis/export periplasmic protein WcbA	0	0	0	0.00277762	0	1	1	0.99723	1
Cell Wall and Capsule	Gram-Negative cell wall components	Lipid A modifications	Phosphoethanolamine transferase EptA specific for the 1 phosphate group of core-lipid A	0	0	0	0.00277762	0	1	1	0.99723	1
Cell Wall and Capsule	Capsular and extracellular polysacchrides	Capsular Polysaccharides Biosynthesis and Assembly	Capsular polysaccharide ABC transporter, ATP-binding protein KpsT - #1	0	0	0	0.00277762	0	1	1	0.99723	1
Cell Wall and Capsule	Gram-Positive cell wall components	Teichoic and lipoteichoic acids biosynthesis	Teichoic acid biosynthesis protein	0	0	0.00525514	0.00277762	0	1	0.994772	0.99723	1
Cell Wall and Capsule	Capsular and extracellular polysacchrides	Capsular surface virulence antigen loci	Vi polysaccharide biosynthesis protein tviC	0	0	0.0472962	0.00277762	0	1	0.95484	0.99723	1
Cell Wall and Capsule	Capsular and extracellular polysacchrides	Vibrio Polysaccharide (VPS) Biosynthesis	Capsular polysaccharide synthesis enzyme CpsD, exopolysaccharide synthesis - #1	0	0	0	0.00555525	0	1	1	0.994475	1
Cell Wall and Capsule	Capsular and extracellular polysacchrides	Exopolysaccharide Biosynthesis	Capsular polysaccharide synthesis enzyme CpsD, exopolysaccharide synthesis	0	0	0	0.00555525	0	1	1	0.994475	1
Cell Wall and Capsule	Capsular and extracellular polysacchrides	YjbEFGH Locus Involved in Exopolysaccharide Production	YjbH outer membrane lipoprotein	0	0	0	0.00555525	0	1	1	0.994475	1
Cell Wall and Capsule	Gram-Negative cell wall components	Perosamine Synthesis Vibrio	Perosamine synthetase	0	0	0.0105103	0.00555525	0	1	0.989599	0.994475	1
Cell Wall and Capsule	Capsular and extracellular polysacchrides	Capsular Polysaccharides Biosynthesis and Assembly	Polysaccharide export lipoprotein Wza	0	0	0	0.00833287	0	1	1	0.991736	1
Cell Wall and Capsule	Capsular and extracellular polysacchrides	Rhamnose containing glycans	Capsular polysaccharide export system protein KpsC - #1	0	0	0	0.00833287	0	1	1	0.991736	1
Cell Wall and Capsule	Capsular and extracellular polysacchrides	Colanic acid biosynthesis	Polysaccharide export lipoprotein Wza - #1	0	0	0	0.00833287	0	1	1	0.991736	1
Cell Wall and Capsule	Capsular and extracellular polysacchrides	Colanic acid biosynthesis	GDP-mannose mannosyl hydrolase (EC 3.6.1.-) - #1	0	0	0	0.00833287	0	1	1	0.991736	1
Cell Wall and Capsule	Capsular and extracellular polysacchrides	Capsular Polysaccharides Biosynthesis and Assembly	Capsular polysaccharide export system protein KpsC	0	0	0	0.00833287	0	1	1	0.991736	1
Cell Wall and Capsule	Gram-Positive cell wall components	Teichoic and lipoteichoic acids biosynthesis	diglucosyldiacylglycerol synthase (LTA membrane anchor synthesis)	0	0	0	0.00833287	0	1	1	0.991736	1
Cell Wall and Capsule	Capsular and extracellular polysacchrides	Vibrio Polysaccharide (VPS) Biosynthesis	Capsular polysaccharide synthesis enzyme CpsA, sugar transferase - #1	0	0	0	0.0111105	0	1	1	0.989012	1
Cell Wall and Capsule	Gram-Negative cell wall components	LOS core oligosaccharide biosynthesis	UDP-glucose:(heptosyl) LPS alpha1,3-glucosyltransferase WaaG (EC 2.4.1.-)	0	0	0	0.0111105	0	1	1	0.989012	1
Cell Wall and Capsule	Capsular and extracellular polysacchrides	Exopolysaccharide Biosynthesis	Capsular polysaccharide synthesis enzyme CpsA, sugar transferase	0	0	0	0.0111105	0	1	1	0.989012	1
Cell Wall and Capsule	Capsular and extracellular polysacchrides	Capsular Polysaccharides Biosynthesis and Assembly	Capsular polysaccharide biosynthesis glycosyltransferase	0	0	0	0.0166657	0	1	1	0.983607	1
Cell Wall and Capsule	Capsular and extracellular polysacchrides	Serotype determining Capsular polysaccharide biosynthesis in Staphylococcus	Capsular polysaccharide synthesis enzyme Cap8F	0	0	0	0.0166657	0	1	1	0.983607	1
Cell Wall and Capsule	Capsular and extracellular polysacchrides	Rhamnose containing glycans	Alpha-L-Rha alpha-1,2-L-rhamnosyltransferase/alpha-L-Rha alpha-1,3-L- rhamnosyltransferase (EC 2.4.1.-)	0	0	0	0.022221	0	1	1	0.978262	1
Cell Wall and Capsule	Capsular and extracellular polysacchrides	Pseudaminic Acid Biosynthesis	Pseudaminic acid cytidylyltransferase (EC 2.7.7.43)	0	0	0.0157654	0.0249986	0	1	0.984479	0.975611	1
Cell Wall and Capsule	Capsular and extracellular polysacchrides	Colanic acid biosynthesis	Colanic acid biosysnthesis glycosyl transferase WcaI	0	0	0	0.0277762	0	1	1	0.972974	1
Cell Wall and Capsule	Cell Wall and Capsule	Peptidoglycan biosynthesis--gjo	UDP-N-acetylmuramoylalanyl-D-glutamate--L-diaminobutyrate ligase	0	0	0	0.0305539	0	1	1	0.970352	1
Cell Wall and Capsule	Gram-Negative cell wall components	LOS core oligosaccharide biosynthesis	Beta-1,3-glucosyltransferase	0	0	0.236481	0.0416644	0	1	0.808747	0.960002	1
Cell Wall and Capsule	Gram-Negative cell wall components	Lipid A modifications	Phosphoethanolamine transferase specific for the outer Kdo residue of lipopolysaccharide	0	0	0	0.0527748	0	1	1	0.949871	1
Cell Wall and Capsule	Capsular and extracellular polysacchrides	CMP-N-acetylneuraminate Biosynthesis	N-Acetylneuraminate cytidylyltransferase (EC 2.7.7.43)	0	0	0	0.0722182	0	1	1	0.932646	1
Cell Wall and Capsule	Capsular and extracellular polysacchrides	Sialic Acid Metabolism	N-Acetylneuraminate cytidylyltransferase (EC 2.7.7.43) - #1	0	0	0	0.0722182	0	1	1	0.932646	1
Cell Wall and Capsule	Cell Wall and Capsule	Peptidoglycan Biosynthesis	Rare lipoprotein A precursor	0	0	0.115613	0.0805511	0	1	0.896368	0.925454	1
Cell Wall and Capsule	Capsular and extracellular polysacchrides	Capsular Polysaccharides Biosynthesis and Assembly	Tyrosine-protein kinase Wzc (EC 2.7.10.2)	0	0	0.36786	0.122215	0	1	0.731069	0.891095	1
Cell Wall and Capsule	Capsular and extracellular polysacchrides	Colanic acid biosynthesis	Tyrosine-protein kinase Wzc (EC 2.7.10.2) - #1	0	0	0.36786	0.122215	0	1	0.731069	0.891095	1
Cell Wall and Capsule	Capsular and extracellular polysacchrides	Sialic Acid Metabolism	N-acetylglucosamine-6-phosphate deacetylase (EC 3.5.1.25) - #2	0	0	0	0.22221	0	1	1	0.81819	1
Cell Wall and Capsule	Gram-Positive cell wall components	Teichoic and lipoteichoic acids biosynthesis	2-C-methyl-D-erythritol 4-phosphate cytidylyltransferase (EC 2.7.7.60)	0	0	0.409901	0.252764	0	1	0.70927	0.798235	1
Cell Wall and Capsule	Gram-Negative cell wall components	Vibrio Core Oligosaccharide Biosynthesis	Polysaccharide deacetylase - #2	0	0	0.346839	0.297206	0	1	0.742479	0.770888	1
Cell Wall and Capsule	Capsular and extracellular polysacchrides	Polysaccharide deacetylases	Polysaccharide deacetylase - #1	0	0	0.346839	0.297206	0	1	0.742479	0.770888	1
Cell Wall and Capsule	Capsular and extracellular polysacchrides	Exopolysaccharide Biosynthesis	Glycosyl transferase, group 2 family protein	0	0	0	0.508305	0	1	1	0.662996	1
Cell Wall and Capsule	Capsular and extracellular polysacchrides	Vibrio Polysaccharide (VPS) Biosynthesis	polysaccharide biosynthesis protein, putative	0	0	0	0	0.0242856	1	1	1	0.97629
Cell Wall and Capsule	Capsular and extracellular polysacchrides	Sialic Acid Metabolism	PTS system, mannose-specific IIC component (EC 2.7.1.69) - #1	0	0	0	0	0.0242856	1	1	1	0.97629
Cell Wall and Capsule	Capsular and extracellular polysacchrides	Sialic Acid Metabolism	PTS system, mannose-specific IIB component (EC 2.7.1.69) - #1	0	0	0	0	0.0242856	1	1	1	0.97629
Cell Wall and Capsule	Capsular and extracellular polysacchrides	Sialic Acid Metabolism	PTS system, mannose-specific IIA component (EC 2.7.1.69) - #1	0	0	0	0.0111105	0.0242856	1	1	0.989012	0.97629
Cell Wall and Capsule	Capsular and extracellular polysacchrides	Capsular Polysaccharides Biosynthesis and Assembly	Putative capsular polysaccharide transport protein YegH	0	0	0	0	0.0323808	1	1	1	0.968635
Cell Wall and Capsule	Capsular and extracellular polysacchrides	Extracellular Polysaccharide Biosynthesis of Streptococci	Galactosyl transferase CpsE (EC 2.7.8.-)	0	0	0	0	0.0323808	1	1	1	0.968635
Cell Wall and Capsule	Capsular and extracellular polysacchrides	Colanic acid biosynthesis	Colanic acid biosynthsis UDP-glucose lipid carrier transferase WcaJ	0	0	0	0.0111105	0.0323808	1	1	0.989012	0.968635
Cell Wall and Capsule	Gram-Negative cell wall components	Inner membrane protein YhjD and conserved cluster involved in LPS biosynthesis	Inner membrane metabolite transport protein YhjE	0	0	0	0	0.040476	1	1	1	0.961099
Cell Wall and Capsule	Gram-Positive cell wall components	Anthrose Biosynthesis	Methyltransferase, anthrose biosynthesis	0	0	0	0	0.040476	1	1	1	0.961099
Cell Wall and Capsule	Cell Wall and Capsule	UDP-N-acetylmuramate from Fructose-6-phosphate Biosynthesis	N-acetylglucosamine-1-phosphate uridyltransferase eukaryotic (EC 2.7.7.23) - #1	0	0	0.0105103	0	0.040476	1	0.989599	1	0.961099
Cell Wall and Capsule	Cell Wall and Capsule	Peptidoglycan Biosynthesis	N-acetylglucosamine-1-phosphate uridyltransferase eukaryotic (EC 2.7.7.23)	0	0	0.0105103	0	0.040476	1	0.989599	1	0.961099
Cell Wall and Capsule	Gram-Negative cell wall components	Lipopolysaccharide-related cluster in Alphaproteobacteria	Uncharacterized protein, Bsl7517 homolog	0	0	0	0	0.0485712	1	1	1	0.953679
Cell Wall and Capsule	Capsular and extracellular polysacchrides	Alginate metabolism	GDP-mannose 6-dehydrogenase (EC 1.1.1.132)	0	0	0	0.0194434	0.0485712	1	1	0.980927	0.953679
Cell Wall and Capsule	Cell Wall and Capsule	Peptidoglycan Biosynthesis	Penicillin-insensitive transglycosylase (EC 2.4.2.-) & transpeptidase PBP-1C	0	0	0	0	0.0971424	1	1	1	0.911459
Cell Wall and Capsule	Gram-Negative cell wall components	Lipopolysaccharide-related cluster in Alphaproteobacteria	Murein endopeptidase	0	0	0	0	0.113333	1	1	1	0.898204
Cell Wall and Capsule	Capsular and extracellular polysacchrides	Rhamnose containing glycans	Alpha-L-Rha alpha-1,3-L-rhamnosyltransferase (EC 2.4.1.-)	0	0	0	0	0.137618	1	1	1	0.879029
Cell Wall and Capsule	Capsular and extracellular polysacchrides	Exopolysaccharide Biosynthesis	Undecaprenyl-phosphate galactosephosphotransferase (EC 2.7.8.6)	0	0	0.0630616	0.119438	0.178094	1	0.940679	0.893306	0.848828
Cell Wall and Capsule	Cell Wall and Capsule	Murein Hydrolases	Membrane-bound lytic murein transglycosylase A precursor (EC 3.2.1.-)	0	0	0.262757	0.127771	0.412855	1	0.791918	0.886705	0.707787
Cell Wall and Capsule	Capsular and extracellular polysacchrides	Rhamnose containing glycans	dTDP-4-dehydrorhamnose reductase (EC 1.1.1.133)	0	0	0	0.649964	0.599045	1	1	0.606074	0.625373
Cell Wall and Capsule	Capsular and extracellular polysacchrides	dTDP-rhamnose synthesis	dTDP-4-dehydrorhamnose reductase (EC 1.1.1.133) - #1	0	0	0	0.649964	0.599045	1	1	0.606074	0.625373
Cell Wall and Capsule	Gram-Negative cell wall components	KDO2-Lipid A biosynthesis	Lipid A biosynthesis lauroyl acyltransferase (EC 2.3.1.-)	0.174658	0.174204	0.304798	0.322204	0.785234	1.00039	0.90026	0.888409	0.657985
Cell Wall and Capsule	Gram-Negative cell wall components	Lipopolysaccharide assembly	Lipoprotein releasing system transmembrane protein LolE	0.0788777	0.0782139	0.215461	0.144436	0.113333	1.00062	0.887629	0.942715	0.969052
Cell Wall and Capsule	Gram-Negative cell wall components	Lipoprotein sorting system	Lipoprotein releasing system transmembrane protein LolE - #1	0.0788777	0.0782139	0.215461	0.144436	0.113333	1.00062	0.887629	0.942715	0.969052
Cell Wall and Capsule	Gram-Negative cell wall components	Lipid A-Ara4N pathway ( Polymyxin resistance )	UDP-glucose dehydrogenase (EC 1.1.1.22) - #1	1.00287	0.999005	1.03526	1.17216	1.26285	1.00194	0.984086	0.922067	0.885111
Cell Wall and Capsule	Gram-Positive cell wall components	Teichuronic acid biosynthesis	UDP-glucose dehydrogenase (EC 1.1.1.22) - #2	1.00287	0.999005	1.03526	1.17216	1.26285	1.00194	0.984086	0.922067	0.885111
Cell Wall and Capsule	Capsular and extracellular polysacchrides	Streptococcal Hyaluronic Acid Capsule	UDP-glucose dehydrogenase (EC 1.1.1.22)	1.00287	0.999005	1.03526	1.17216	1.26285	1.00194	0.984086	0.922067	0.885111
Cell Wall and Capsule	Capsular and extracellular polysacchrides	Legionaminic Acid Biosynthesis	Legionaminic acid biosynthesis protein PtmF	0.00563412	0	0	0	0	1.00563	1.00563	1.00563	1.00563
Cell Wall and Capsule	Gram-Negative cell wall components	Perosamine Synthesis Vibrio	O-antigen export system, ATP-binding protein	0.00563412	0	0	0.0194434	0.0890472	1.00563	1.00563	0.986454	0.923407
Cell Wall and Capsule	Gram-Negative cell wall components	KDO2-Lipid A biosynthesis	Protein of unknown function DUF1009 clustered with KDO2-Lipid A biosynthesis genes	0.00563412	0	0	0	0.121428	1.00563	1.00563	1.00563	0.896744
Cell Wall and Capsule	Gram-Positive cell wall components	Teichoic and lipoteichoic acids biosynthesis	Teichoic acid export ATP-binding protein TagH (EC 3.6.3.40) - #1	0.0563412	0.0497725	0.0315308	0.0388867	0.0485712	1.00626	1.02405	1.0168	1.00741
Cell Wall and Capsule	Capsular and extracellular polysacchrides	Rhamnose containing glycans	Teichoic acid export ATP-binding protein TagH (EC 3.6.3.40)	0.0563412	0.0497725	0.0315308	0.0388867	0.0485712	1.00626	1.02405	1.0168	1.00741
Cell Wall and Capsule	Gram-Negative cell wall components	Lipopolysaccharide assembly	Outer membrane protein YfgL, lipoprotein component of the protein assembly complex (forms a complex with YaeT, YfiO, and NlpB)	0.09578	0.0888794	0	0.0999944	0.194285	1.00634	1.09578	0.996169	0.91752
Cell Wall and Capsule	Capsular and extracellular polysacchrides	Alginate metabolism	Probable poly(beta-D-mannuronate) O-acetylase (EC 2.3.1.-)	0.09578	0.0888794	0.394135	0.32776	0.955234	1.00634	0.785993	0.825285	0.560434
Cell Wall and Capsule	Cell wall of Mycobacteria	mycolic acid synthesis	3-oxoacyl-[acyl-carrier-protein] synthase, KASII (EC 2.3.1.41)	2.32689	2.30375	1.65011	1.22771	1.84571	1.007	1.25538	1.49341	1.16909
Cell Wall and Capsule	Capsular and extracellular polysacchrides	Pseudaminic Acid Biosynthesis	Pseudaminic acid synthase (EC 4.1.3.-)	0.0394388	0.0319966	0	0.0361091	0	1.00721	1.03944	1.00321	1.03944
Cell Wall and Capsule	Capsular and extracellular polysacchrides	Alginate metabolism	Mannose-1-phosphate guanylyltransferase (GDP) (EC 2.7.7.22) - #1	0.321145	0.3093	0.877608	0.569413	1.32761	1.00905	0.703632	0.841808	0.567597
Cell Wall and Capsule	Gram-Negative cell wall components	Perosamine Synthesis Vibrio	Mannose-1-phosphate guanylyltransferase (GDP) (EC 2.7.7.22) - #2	0.321145	0.3093	0.877608	0.569413	1.32761	1.00905	0.703632	0.841808	0.567597
Cell Wall and Capsule	Capsular and extracellular polysacchrides	Streptococcal Hyaluronic Acid Capsule	UTP--glucose-1-phosphate uridylyltransferase (EC 2.7.7.9)	0.64229	0.625711	0.536024	0.29165	0.380474	1.0102	1.06918	1.27147	1.18966
Cell Wall and Capsule	Gram-Negative cell wall components	Lipopolysaccharide assembly	Inner membrane protein YrbG, predicted calcium/sodium:proton antiporter	0.0112682	0	0	0	0	1.01127	1.01127	1.01127	1.01127
Cell Wall and Capsule	Capsular and extracellular polysacchrides	Colanic acid biosynthesis	Colanic acid biosynthesis glycosyl transferase WcaL	0.0169024	0	0	0	0	1.0169	1.0169	1.0169	1.0169
Cell Wall and Capsule	Capsular and extracellular polysacchrides	Phosphorylcholine incorporation in LPS	Lipopolysaccharide cholinephosphotransferase LicD1 (EC 2.7.8.-)	0.0169024	0	0	0	0	1.0169	1.0169	1.0169	1.0169
Cell Wall and Capsule	Capsular and extracellular polysacchrides	O-Methyl Phosphoramidate Capsule Modification in Campylobacter	Adenylylsulfate kinase (EC 2.7.1.25) - #1	0.411291	0.383959	0.441431	0.574968	0.566664	1.01975	0.97909	0.896076	0.900825
Cell Wall and Capsule	Gram-Negative cell wall components	Vibrio Core Oligosaccharide Biosynthesis	O-antigen ligase - #1	0.0281706	0.00711035	0.0525514	0	0	1.02091	0.976837	1.02817	1.02817
Cell Wall and Capsule	Gram-Negative cell wall components	LOS core oligosaccharide biosynthesis	O-antigen ligase	0.0281706	0.00711035	0.0525514	0	0	1.02091	0.976837	1.02817	1.02817
Cell Wall and Capsule	Capsular and extracellular polysacchrides	Legionaminic Acid Biosynthesis	Legionaminic acid cytidylyltransferase (EC 2.7.7.43)	0.0225365	0	0	0	0	1.02254	1.02254	1.02254	1.02254
Cell Wall and Capsule	Cell Wall and Capsule	Peptidoglycan Biosynthesis	UDP-N-acetylglucosamine 1-carboxyvinyltransferase (EC 2.5.1.7)	2.28745	2.20065	1.60807	1.39714	1.28714	1.02712	1.26049	1.3714	1.43737
Cell Wall and Capsule	Cell Wall and Capsule	UDP-N-acetylmuramate from Fructose-6-phosphate Biosynthesis	UDP-N-acetylglucosamine 1-carboxyvinyltransferase (EC 2.5.1.7) - #1	2.28745	2.20065	1.60807	1.39714	1.28714	1.02712	1.26049	1.3714	1.43737
Cell Wall and Capsule	Cell Wall and Capsule	Murein Hydrolases	Membrane-bound lytic murein transglycosylase D precursor (EC 3.2.1.-)	0.28734	0.252418	0.352094	0.349981	0.21857	1.02788	0.952108	0.953599	1.05643
Cell Wall and Capsule	Cell Wall and Capsule	Recycling of Peptidoglycan Amino Acids	AmpG permease	0.225365	0.19198	0.409901	0.297206	0.161904	1.02801	0.869114	0.944619	1.05462
Cell Wall and Capsule	Gram-Negative cell wall components	Major Outer Membrane Proteins	Osmolarity sensory histidine kinase EnvZ	0.0281706	0	0.0105103	0	0	1.02817	1.01748	1.02817	1.02817
Cell Wall and Capsule	Capsular and extracellular polysacchrides	Sialic Acid Metabolism	Predicted sialic acid transporter	0.0281706	0	0.0472962	0	0	1.02817	0.981738	1.02817	1.02817
Cell Wall and Capsule	Gram-Negative cell wall components	Major Outer Membrane Proteins	Outer membrane protein W precursor	0.0507071	0.0213311	0	0.0388867	0.0647616	1.02876	1.05071	1.01138	0.9868
Cell Wall and Capsule	Gram-Negative cell wall components	Lipopolysaccharide assembly	Uncharacterized ABC transporter, periplasmic component YrbD	0.0732436	0.0426621	0.0525514	0.0333315	0.040476	1.02933	1.01966	1.03862	1.03149
Cell Wall and Capsule	Cell Wall and Capsule	Murein Hydrolases	Muramoyltetrapeptide carboxypeptidase (EC 3.4.17.13)	0.185926	0.149317	0.110358	0.183323	0.526188	1.03185	1.06806	1.0022	0.777051
Cell Wall and Capsule	Cell Wall and Capsule	Recycling of Peptidoglycan Amino Acids	Muramoyltetrapeptide carboxypeptidase (EC 3.4.17.13) - #1	0.185926	0.149317	0.110358	0.183323	0.526188	1.03185	1.06806	1.0022	0.777051
Cell Wall and Capsule	Capsular and extracellular polysacchrides	Sialic Acid Metabolism	TRAP-type transport system, periplasmic component, predicted N-acetylneuraminate-binding protein	0.0676094	0.0319966	0.0945925	0.183323	0.169999	1.03451	0.975349	0.902213	0.912487
Cell Wall and Capsule	Capsular and extracellular polysacchrides	Rhamnose containing glycans	Glycerol-3-phosphate cytidylyltransferase (EC 2.7.7.39)	0.112682	0.0746587	0.651637	0.461085	0.040476	1.03538	0.673685	0.761545	1.0694
Cell Wall and Capsule	Cell wall of Mycobacteria	mycolic acid synthesis	Acyl carrier protein	0.433827	0.383959	0.325818	0.22221	0.582854	1.03603	1.08147	1.17314	0.905849
Cell Wall and Capsule	Gram-Negative cell wall components	KDO2-Lipid A biosynthesis	UDP-3-O-[3-hydroxymyristoyl] N-acetylglucosamine deacetylase (EC 3.5.1.-)	0.326779	0.277304	0.283777	0.441642	0.412855	1.03873	1.0335	0.920325	0.939076
Cell Wall and Capsule	Capsular and extracellular polysacchrides	Capsular Polysaccharides Biosynthesis and Assembly	UDP-N-acetylglucosamine 4-epimerase (EC 5.1.3.7)	0.0394388	0	0	0	0	1.03944	1.03944	1.03944	1.03944
Cell Wall and Capsule	Gram-Negative cell wall components	KDO2-Lipid A biosynthesis	UDP-N-acetylglucosamine 4-epimerase (EC 5.1.3.7) - #1	0.0394388	0	0	0	0	1.03944	1.03944	1.03944	1.03944
Cell Wall and Capsule	Cell Wall and Capsule	Murein Hydrolases	Beta N-acetyl-glucosaminidase (EC 3.2.1.52)	0.185926	0.138652	0.273267	0.224988	0.461426	1.04152	0.931404	0.968113	0.811485
Cell Wall and Capsule	Cell Wall and Capsule	Recycling of Peptidoglycan Amino Sugars	Beta N-acetyl-glucosaminidase (EC 3.2.1.52) - #1	0.185926	0.138652	0.273267	0.224988	0.461426	1.04152	0.931404	0.968113	0.811485
Cell Wall and Capsule	Capsular and extracellular polysacchrides	dTDP-rhamnose synthesis	Glucose-1-phosphate cytidylyltransferase (EC 2.7.7.33)	0.219731	0.170648	0.0945925	0.183323	1.10095	1.04193	1.11432	1.03077	0.580562
Cell Wall and Capsule	Cell Wall and Capsule	Recycling of Peptidoglycan Amino Sugars	N-acetylmuramic acid 6-phosphate etherase (EC 4.2.-.-)	0.253535	0.202645	0	0.283318	0.080952	1.04232	1.25354	0.976793	1.15966
Cell Wall and Capsule	Cell Wall and Capsule	UDP-N-acetylmuramate from Fructose-6-phosphate Biosynthesis	N-acetylmuramic acid 6-phosphate etherase (EC 4.2.-.-) - #1	0.253535	0.202645	0	0.283318	0.080952	1.04232	1.25354	0.976793	1.15966
Cell Wall and Capsule	Cell Wall and Capsule	Recycling of Peptidoglycan Amino Acids	Aminoacyl-histidine dipeptidase (Peptidase D) (EC 3.4.13.3)	0.0845118	0.0391069	0.0157654	0.0722182	0	1.0437	1.06768	1.01147	1.08451
Cell Wall and Capsule	Gram-Negative cell wall components	Major Outer Membrane Proteins	Two-component system response regulator OmpR	0.09578	0.0497725	0.110358	0.172213	0.0971424	1.04383	0.986871	0.934796	0.998758
Cell Wall and Capsule	Capsular and extracellular polysacchrides	Vibrio Polysaccharide (VPS) Biosynthesis	Low molecular weight protein tyrosine phosphatase (EC 3.1.3.48)	0.045073	0	0.0945925	0	0	1.04507	0.95476	1.04507	1.04507
Cell Wall and Capsule	Cell Wall and Capsule	Recycling of Peptidoglycan Amino Acids	L-alanine-DL-glutamate epimerase	0.045073	0	0	0.0527748	0.42095	1.04507	1.04507	0.992684	0.735475
Cell Wall and Capsule	Gram-Negative cell wall components	Lipid A-Ara4N pathway ( Polymyxin resistance )	Polymyxin resistance protein ArnA_DH, UDP-glucuronic acid decarboxylase (EC 4.1.1.-)	0.123951	0.0746587	0.126123	0.136104	0.121428	1.04587	0.998071	0.989303	1.00225
Cell Wall and Capsule	Cell Wall and Capsule	Murein Hydrolases	Soluble lytic murein transglycosylase precursor (EC 3.2.1.-)	0.281706	0.223976	0.451942	0.399978	0.882377	1.04717	0.882753	0.915519	0.680898
Cell Wall and Capsule	Capsular and extracellular polysacchrides	Sialic Acid Metabolism	PTS system, N-acetylglucosamine-specific IIA component (EC 2.7.1.69) - #1	0.0507071	0	0	0	0	1.05071	1.05071	1.05071	1.05071
Cell Wall and Capsule	Gram-Negative cell wall components	Lipid A-Ara4N pathway ( Polymyxin resistance )	Polymyxin resistance protein ArnA_FT, UDP-4-amino-4-deoxy-L-arabinose formylase (EC 2.1.2.-)	0.0507071	0	0	0.0527748	0.283332	1.05071	1.05071	0.998036	0.818734
Cell Wall and Capsule	Capsular and extracellular polysacchrides	Phosphorylcholine incorporation in LPS	Choline kinase (EC 2.7.1.32)	0.0619753	0.0106655	0.0735719	0	0	1.05077	0.989198	1.06198	1.06198
Cell Wall and Capsule	Cell Wall and Capsule	Peptidoglycan Biosynthesis	D-alanine--D-alanine ligase A (EC 6.3.2.4)	0.0619753	0	0	0	0	1.06198	1.06198	1.06198	1.06198
Cell Wall and Capsule	Capsular and extracellular polysacchrides	Legionaminic Acid Biosynthesis	Bacillosamine/Legionaminic acid biosynthesis N-acetyltrasferase PglD (PseH and NeuD homolog)	0.0619753	0	0	0	0	1.06198	1.06198	1.06198	1.06198
Cell Wall and Capsule	Cell Wall and Capsule	Peptidoglycan biosynthesis--gjo	D-alanine--D-alanine ligase A (EC 6.3.2.4) - #1	0.0619753	0	0	0	0	1.06198	1.06198	1.06198	1.06198
Cell Wall and Capsule	Capsular and extracellular polysacchrides	Legionaminic Acid Biosynthesis	Legionaminic acid synthase (EC 2.5.1.56)	0.0619753	0	0	0.0111105	0	1.06198	1.06198	1.05031	1.06198
Cell Wall and Capsule	Gram-Negative cell wall components	Lipopolysaccharide assembly	Lipopolysaccharide ABC transporter, ATP-binding protein LptB - #1	0.0845118	0.0177759	0	0.0583301	0	1.06557	1.08451	1.02474	1.08451
Cell Wall and Capsule	Gram-Negative cell wall components	KDO2-Lipid A biosynthesis	Lipopolysaccharide ABC transporter, ATP-binding protein LptB	0.0845118	0.0177759	0	0.0583301	0	1.06557	1.08451	1.02474	1.08451
Cell Wall and Capsule	Cell wall of Mycobacteria	mycolic acid synthesis	3-OXOACYL-[ACYL-CARRIER-PROTEIN] SYNTHASE III FABH (BETA-KETOACYL-ACP SYNTHASE III) (KAS III)	0.101414	0.0319966	0	0	0.0647616	1.06727	1.10141	1.10141	1.03442
Cell Wall and Capsule	Gram-Negative cell wall components	Lipopolysaccharide assembly	Outer membrane chaperone Skp (OmpH) precursor	0.0676094	0	0	0	0.0566664	1.06761	1.06761	1.06761	1.01036
Cell Wall and Capsule	Cell wall of Mycobacteria	mycolic acid synthesis	acyl-CoA synthetase	0.343681	0.255973	0.0472962	0.0499972	0.299522	1.06983	1.283	1.2797	1.03398
Cell Wall and Capsule	Capsular and extracellular polysacchrides	Vibrio Polysaccharide (VPS) Biosynthesis	Serine acetyltransferase (EC 2.3.1.30) - #2	0.461998	0.362628	0.325818	0.424976	0.639521	1.07293	1.10271	1.02598	0.891723
Cell Wall and Capsule	Cell Wall and Capsule	Peptidoglycan Biosynthesis	Membrane-bound lytic murein transglycosylase B precursor (EC 3.2.1.-) - #1	0.185926	0.0995449	0	0.108327	0	1.07856	1.18593	1.07001	1.18593
Cell Wall and Capsule	Cell Wall and Capsule	Murein Hydrolases	Membrane-bound lytic murein transglycosylase B precursor (EC 3.2.1.-)	0.185926	0.0995449	0	0.108327	0	1.07856	1.18593	1.07001	1.18593
Cell Wall and Capsule	Gram-Positive cell wall components	Teichuronic acid biosynthesis	Putative N-acetylgalactosaminyl-diphosphoundecaprenol glucuronosyltransferase	0.0788777	0	0	0	0	1.07888	1.07888	1.07888	1.07888
Cell Wall and Capsule	Gram-Negative cell wall components	Lipopolysaccharide assembly	Uncharacterized ABC transporter, permease component YrbE	0.152121	0.0675484	0.0945925	0.141659	0.0647616	1.07922	1.05256	1.00916	1.08205
Cell Wall and Capsule	Gram-Negative cell wall components	Outer membrane	Outer membrane protein H precursor - #1	0.123951	0.0391069	0	0	0	1.08165	1.12395	1.12395	1.12395
Cell Wall and Capsule	Gram-Negative cell wall components	Major Outer Membrane Proteins	Outer membrane protein H precursor	0.123951	0.0391069	0	0	0	1.08165	1.12395	1.12395	1.12395
Cell Wall and Capsule	Capsular and extracellular polysacchrides	Sialic Acid Metabolism	TRAP-type transport system, large permease component, predicted N-acetylneuraminate transporter	0.146487	0.0568828	0.0420411	0.0611077	0	1.08478	1.10023	1.08046	1.14649
Cell Wall and Capsule	Cell Wall and Capsule	Peptidoglycan Biosynthesis	UDP-N-acetylenolpyruvoylglucosamine reductase (EC 1.1.1.158)	0.704265	0.565273	0.472962	0.363869	0.728568	1.0888	1.15703	1.24958	0.98594
Cell Wall and Capsule	Cell Wall and Capsule	UDP-N-acetylmuramate from Fructose-6-phosphate Biosynthesis	UDP-N-acetylenolpyruvoylglucosamine reductase (EC 1.1.1.158) - #1	0.704265	0.565273	0.472962	0.363869	0.728568	1.0888	1.15703	1.24958	0.98594
Cell Wall and Capsule	Gram-Negative cell wall components	Lipopolysaccharide assembly	HtrA protease/chaperone protein	0.338047	0.227531	0	0.238876	0	1.09003	1.33805	1.08005	1.33805
Cell Wall and Capsule	Capsular and extracellular polysacchrides	Sialic Acid Metabolism	PTS system, N-acetylglucosamine-specific IIC component (EC 2.7.1.69) - #1	0.0901459	0	0	0	0	1.09015	1.09015	1.09015	1.09015
Cell Wall and Capsule	Capsular and extracellular polysacchrides	Sialic Acid Metabolism	PTS system, N-acetylglucosamine-specific IIB component (EC 2.7.1.69) - #1	0.0901459	0	0	0	0	1.09015	1.09015	1.09015	1.09015
Cell Wall and Capsule	Capsular and extracellular polysacchrides	CMP-N-acetylneuraminate Biosynthesis	N-acetylneuraminate synthase (EC 2.5.1.56)	0.535241	0.401735	0.588575	0.494417	0.242856	1.09524	0.966427	1.02732	1.23525
Cell Wall and Capsule	Capsular and extracellular polysacchrides	Sialic Acid Metabolism	N-acetylneuraminate synthase (EC 2.5.1.56) - #1	0.535241	0.401735	0.588575	0.494417	0.242856	1.09524	0.966427	1.02732	1.23525
Cell Wall and Capsule	Capsular and extracellular polysacchrides	Sialic Acid Metabolism	Glucosamine--fructose-6-phosphate aminotransferase [isomerizing] (EC 2.6.1.16) - #1	3.04806	2.68416	3.0217	1.986	1.58666	1.09877	1.00655	1.35568	1.56498
Cell Wall and Capsule	Cell Wall and Capsule	UDP-N-acetylmuramate from Fructose-6-phosphate Biosynthesis	Glucosamine--fructose-6-phosphate aminotransferase [isomerizing] (EC 2.6.1.16)	3.04806	2.68416	3.0217	1.986	1.58666	1.09877	1.00655	1.35568	1.56498
Cell Wall and Capsule	Capsular and extracellular polysacchrides	Rhamnose containing glycans	dTDP-4-dehydrorhamnose 3,5-epimerase (EC 5.1.3.13) - #1	0.433827	0.298635	0.415156	0.552747	0.364284	1.1041	1.01319	0.923413	1.05097
Cell Wall and Capsule	Capsular and extracellular polysacchrides	dTDP-rhamnose synthesis	dTDP-4-dehydrorhamnose 3,5-epimerase (EC 5.1.3.13) - #2	0.433827	0.298635	0.415156	0.552747	0.364284	1.1041	1.01319	0.923413	1.05097
Cell Wall and Capsule	Capsular and extracellular polysacchrides	Capsular heptose biosynthesis	dTDP-4-dehydrorhamnose 3,5-epimerase (EC 5.1.3.13)	0.433827	0.298635	0.415156	0.552747	0.364284	1.1041	1.01319	0.923413	1.05097
Cell Wall and Capsule	Cell Wall and Capsule	Peptidoglycan biosynthesis--gjo	UDP-N-acetylmuramoylalanyl-D-glutamate--2,6-diaminopimelate ligase (EC 6.3.2.13) - #1	1.36909	1.14121	0	0.830509	0.647616	1.10643	2.36909	1.29423	1.43789
Cell Wall and Capsule	Cell Wall and Capsule	Peptidoglycan Biosynthesis	UDP-N-acetylmuramoylalanyl-D-glutamate--2,6-diaminopimelate ligase (EC 6.3.2.13)	1.36909	1.14121	0	0.830509	0.647616	1.10643	2.36909	1.29423	1.43789
Cell Wall and Capsule	Gram-Negative cell wall components	KDO2-Lipid A biosynthesis	Lipid-A-disaccharide synthase (EC 2.4.1.182)	0.332413	0.19909	0.536024	0.549969	0.817615	1.11119	0.867443	0.859638	0.733056
Cell Wall and Capsule	Capsular and extracellular polysacchrides	Capsular Polysaccharides Biosynthesis and Assembly	D-glycero-D-manno-heptose 1-phosphate guanosyltransferase	0.169024	0.0497725	0.178675	0.0694406	0.0242856	1.1136	0.991812	1.09312	1.14131
Cell Wall and Capsule	Capsular and extracellular polysacchrides	Capsular heptose biosynthesis	D-glycero-D-manno-heptose 1-phosphate guanosyltransferase - #1	0.169024	0.0497725	0.178675	0.0694406	0.0242856	1.1136	0.991812	1.09312	1.14131
Cell Wall and Capsule	Capsular and extracellular polysacchrides	Capsular heptose biosynthesis	Phosphoheptose isomerase 1 (EC 5.3.1.-)	0.377486	0.231086	0.0630616	0.11666	0.137618	1.11892	1.29577	1.23358	1.21085
Cell Wall and Capsule	Gram-Negative cell wall components	LOS core oligosaccharide biosynthesis	Phosphoheptose isomerase 1 (EC 5.3.1.-) - #1	0.377486	0.231086	0.0630616	0.11666	0.137618	1.11892	1.29577	1.23358	1.21085
Cell Wall and Capsule	Cell Wall and Capsule	Peptidoglycan Biosynthesis	Glutamine synthetase type II, eukaryotic (EC 6.3.1.2) - #2	0.732436	0.543942	0.299543	0.416644	0.20238	1.12209	1.33311	1.22292	1.44084
Cell Wall and Capsule	Gram-Negative cell wall components	Lipopolysaccharide assembly	Outer membrane protein Imp, required for envelope biogenesis	0.28734	0.145762	0	0.294428	0.574759	1.12357	1.28734	0.994524	0.817484
Cell Wall and Capsule	Capsular and extracellular polysacchrides	Capsular Polysaccharides Biosynthesis and Assembly	Capsular polysaccharide biosynthesis protein CapD	0.129585	0	0.0105103	0.0249986	0.080952	1.12958	1.11784	1.10204	1.04499
Cell Wall and Capsule	Gram-Negative cell wall components	LOS core oligosaccharide biosynthesis	UDP-galactopyranose mutase (EC 5.4.99.9)	0.873289	0.654152	1.03526	1.0555	0.38857	1.13248	0.920416	0.911356	1.34908
Cell Wall and Capsule	Cell Wall and Capsule	Murein Hydrolases	N-acetylmuramoyl-L-alanine amidase (EC 3.5.1.28)	0.86202	0.639932	0.677913	0.708294	0.736663	1.13543	1.10972	1.08999	1.07218
Cell Wall and Capsule	Cell Wall and Capsule	Recycling of Peptidoglycan Amino Acids	N-acetylmuramoyl-L-alanine amidase (EC 3.5.1.28) - #1	0.86202	0.639932	0.677913	0.708294	0.736663	1.13543	1.10972	1.08999	1.07218
Cell Wall and Capsule	Capsular and extracellular polysacchrides	Legionaminic Acid Biosynthesis	Legionaminic acid biosynthesis protein PtmG	0.281706	0.124431	0.0105103	0	0	1.13987	1.26838	1.28171	1.28171
Cell Wall and Capsule	Cell Wall and Capsule	Peptidoglycan biosynthesis--gjo	UDP-N-acetylmuramoylalanyl-D-glutamate--L,L-2,6-diaminopimelate ligase	0.140853	0	0.0105103	0	0	1.14085	1.12899	1.14085	1.14085
Cell Wall and Capsule	Capsular and extracellular polysacchrides	Rhamnose containing glycans	UDP-glucose 4-epimerase (EC 5.1.3.2) - #3	2.89594	2.39263	3.92559	3.07483	2.30713	1.14835	0.790959	0.956098	1.17804
Cell Wall and Capsule	Gram-Negative cell wall components	KDO2-Lipid A biosynthesis	2-Keto-3-deoxy-D-manno-octulosonate-8-phosphate synthase (EC 2.5.1.55)	0.557778	0.355518	0.415156	0.722182	0.663806	1.14921	1.10078	0.904537	0.936274
Cell Wall and Capsule	Capsular and extracellular polysacchrides	dTDP-rhamnose synthesis	dTDP-glucose 4,6-dehydratase (EC 4.2.1.46) - #1	1.75785	1.38296	2.19665	2.74429	2.46904	1.15732	0.862731	0.736547	0.794989
Cell Wall and Capsule	Capsular and extracellular polysacchrides	Rhamnose containing glycans	dTDP-glucose 4,6-dehydratase (EC 4.2.1.46)	1.75785	1.38296	2.19665	2.74429	2.46904	1.15732	0.862731	0.736547	0.794989
Cell Wall and Capsule	Gram-Negative cell wall components	Lipopolysaccharide assembly	Lipoprotein releasing system ATP-binding protein LolD	0.157755	0	0.262757	0.322204	0.785234	1.15776	0.916847	0.875625	0.648517
Cell Wall and Capsule	Gram-Negative cell wall components	Lipoprotein sorting system	Lipoprotein releasing system ATP-binding protein LolD - #1	0.157755	0	0.262757	0.322204	0.785234	1.15776	0.916847	0.875625	0.648517
Cell Wall and Capsule	Gram-Negative cell wall components	Lipid A-Ara4N pathway ( Polymyxin resistance )	UDP-4-amino-4-deoxy-L-arabinose--oxoglutarate aminotransferase (EC 2.6.1.-)	0.456364	0.231086	0	0.213877	0.493807	1.18299	1.45636	1.19976	0.974934
Cell Wall and Capsule	Cell Wall and Capsule	Peptidoglycan Biosynthesis	Cell division protein FtsI [Peptidoglycan synthetase] (EC 2.4.1.129) - #1	1.98321	1.49673	1.65011	1.31104	0	1.19485	1.12569	1.29085	2.98321
Cell Wall and Capsule	Capsular and extracellular polysacchrides	Legionaminic Acid Biosynthesis	Bacillosamine/Legionaminic acid biosynthesis aminotransferase PglE	0.247901	0.0391069	0	0.022221	0	1.20094	1.2479	1.22077	1.2479
Cell Wall and Capsule	Gram-Negative cell wall components	Vibrio Core Oligosaccharide Biosynthesis	ADP-L-glycero-D-manno-heptose-6-epimerase (EC 5.1.3.20) - #1	0.4789	0.216866	0.362604	0.38609	0.647616	1.21534	1.08535	1.06696	0.8976
Cell Wall and Capsule	Gram-Negative cell wall components	LOS core oligosaccharide biosynthesis	ADP-L-glycero-D-manno-heptose-6-epimerase (EC 5.1.3.20)	0.4789	0.216866	0.362604	0.38609	0.647616	1.21534	1.08535	1.06696	0.8976
Cell Wall and Capsule	Capsular and extracellular polysacchrides	Capsular heptose biosynthesis	D,D-heptose 7-phosphate kinase	0.219731	0	0	0	0.121428	1.21973	1.21973	1.21973	1.08766
Cell Wall and Capsule	Cell Wall and Capsule	Peptidoglycan Biosynthesis	Glutamate racemase (EC 5.1.1.3) - #2	1.44233	0.995449	1.1719	0.67774	0.550474	1.22395	1.12452	1.45573	1.57522
Cell Wall and Capsule	Gram-Negative cell wall components	KDO2-Lipid A biosynthesis	UDP-2,3-diacylglucosamine hydrolase (EC 3.6.1.-)	1.01978	0.639932	3.1163	2.34987	0.955234	1.23162	0.490678	0.602942	1.03301
Cell Wall and Capsule	Gram-Negative cell wall components	Lipid A-Ara4N pathway ( Polymyxin resistance )	Polymyxin resistance protein ArnT, undecaprenyl phosphate-alpha-L-Ara4N transferase	0.270438	0	0.220716	0.211099	0.955234	1.27044	1.04073	1.049	0.649763
Cell Wall and Capsule	Gram-Negative cell wall components	Vibrio Core Oligosaccharide Biosynthesis	Nucleoside-diphosphate-sugar pyrophosphorylase involved in lipopolysaccharide biosynthesis/translation initiation factor 2B, gamma/epsilon subunits (eIF-2Bgamma/eIF-2Bepsilon)	0.619753	0.241752	0.588575	0.399978	0	1.30441	1.01963	1.15698	1.61975
Cell Wall and Capsule	Capsular and extracellular polysacchrides	Capsular heptose biosynthesis	GDP-mannose 4,6-dehydratase (EC 4.2.1.47)	0.76624	0.312856	0.872353	0.78329	0.364284	1.34534	0.943327	0.990439	1.29463
Cell Wall and Capsule	Capsular and extracellular polysacchrides	Colanic acid biosynthesis	GDP-mannose 4,6-dehydratase (EC 4.2.1.47) - #1	0.76624	0.312856	0.872353	0.78329	0.364284	1.34534	0.943327	0.990439	1.29463
Cell Wall and Capsule	Gram-Negative cell wall components	Perosamine Synthesis Vibrio	GDP-mannose 4,6-dehydratase (EC 4.2.1.47) - #2	0.76624	0.312856	0.872353	0.78329	0.364284	1.34534	0.943327	0.990439	1.29463
Cell Wall and Capsule	Capsular and extracellular polysacchrides	Colanic acid biosynthesis	GDP-L-fucose synthetase (EC 1.1.1.271) - #1	0.918362	0.39818	0.604341	0.772179	0.315713	1.37204	1.19573	1.08249	1.45804
Cell Wall and Capsule	Capsular and extracellular polysacchrides	Capsular heptose biosynthesis	GDP-L-fucose synthetase (EC 1.1.1.271)	0.918362	0.39818	0.604341	0.772179	0.315713	1.37204	1.19573	1.08249	1.45804
Cell Wall and Capsule	Cell Wall and Capsule	Peptidoglycan Biosynthesis	UDP-N-acetylglucosamine--N-acetylmuramyl-(pentapeptide) pyrophosphoryl-undecaprenol N-acetylglucosamine transferase (EC 2.4.1.227)	0.73807	0	0.536024	0.416644	0.647616	1.73807	1.13154	1.22689	1.0549
Clustering-based subsystems	Clustering-based subsystems	CBSS-196620.1.peg.2477	Copper-translocating P-type ATPase (EC 3.6.3.4)	0.417674	0.851626	0.320195	0.39936	1.55157	0.765637	1.07384	1.01309	0.555609
Clustering-based subsystems	DNA polymerase III epsilon cluster	CBSS-342610.3.peg.1536	DNA polymerase III epsilon subunit (EC 2.7.7.7) - #1	0	0.163427	0	0.0882021	0.189328	0.85953	1	0.918947	0.840811
Clustering-based subsystems	Clustering-based subsystems	CBSS-228410.1.peg.134	DNA polymerase III epsilon subunit (EC 2.7.7.7)	0	0.163427	0	0.0882021	0.189328	0.85953	1	0.918947	0.840811
Clustering-based subsystems	Clustering-based subsystems	CBSS-83333.1.peg.946	Cell division inhibitor	0.0775865	0.234875	0.045204	0.0555347	0	0.872628	1.03098	1.02089	1.07759
Clustering-based subsystems	recX and regulatory cluster	CBSS-261594.1.peg.788	Cell division inhibitor - #1	0.0775865	0.234875	0.045204	0.0555347	0	0.872628	1.03098	1.02089	1.07759
Clustering-based subsystems	Clustering-based subsystems	CBSS-312309.3.peg.1965	[Protein-PII] uridylyltransferase (EC 2.7.7.59)	0.11638	0.262797	0.200907	0.225405	0.341715	0.884053	0.929614	0.911029	0.832055
Clustering-based subsystems	Clustering-based subsystems	Possible Ammonia conversion cluster	Para-aminobenzoate synthase, aminase component (EC 2.6.1.85) - #1	0	0.126471	0.133101	0.0637016	0	0.887728	0.882534	0.940113	1
Clustering-based subsystems	Clustering-based subsystems	CTP synthase (EC 6.3.4.2) cluster	CTP synthase (EC 6.3.4.2)	0.753883	0.961673	0.676804	0.600265	0.678811	0.894075	1.04597	1.096	1.04472
Clustering-based subsystems	Probably GTP or GMP signaling related	CBSS-176299.4.peg.1292	GTP pyrophosphokinase (EC 2.7.6.5), (p)ppGpp synthetase I	0.788797	0.99945	0.718241	0.618232	0.501027	0.894644	1.04106	1.1054	1.19171
Clustering-based subsystems	Protein export?	CBSS-393121.3.peg.2760	Protein export cytoplasm protein SecA ATPase RNA helicase (TC 3.A.5.1.1)	1.18707	1.43553	1.29082	1.31568	0.881993	0.897987	0.95471	0.944462	1.16211
Clustering-based subsystems	Probably Pyrimidine biosynthesis-related	CBSS-306254.1.peg.1508	Carbamoyl-phosphate synthase small chain (EC 6.3.5.5) - #1	0.298708	0.445934	0.409347	0.400993	0.341715	0.89818	0.921496	0.926991	0.967947
Clustering-based subsystems	Nucleotidyl-phosphate metabolic cluster	CBSS-222523.1.peg.1311	GTP pyrophosphokinase (EC 2.7.6.5)	0.82759	1.03394	0.778513	0.69745	0.549514	0.898546	1.02759	1.07667	1.17946
Clustering-based subsystems	Nucleotidyl-phosphate metabolic cluster	CBSS-222523.1.peg.1311	GTP pyrophosphokinase	0.82759	1.03394	0.783536	0.69745	0.549514	0.898546	1.0247	1.07667	1.17946
Clustering-based subsystems	Clustering-based subsystems	Conserved gene cluster associated with Met-tRNA formyltransferase	DNA topoisomerase I (EC 5.99.1.2)	0.385346	0.541198	0.345308	0.400176	0.724989	0.898877	1.02976	0.989409	0.803105
Clustering-based subsystems	Ribosomal Protein L28P relates to a set of uncharacterized proteins	A Gram-positive cluster that relates ribosomal protein L28P to a set of uncharacterized proteins	ATP-dependent DNA helicase RecG (EC 3.6.1.-)	0.504313	0.669311	0.561283	0.531663	0.394819	0.901158	0.963511	0.982143	1.0785
Clustering-based subsystems	Clustering-based subsystems	CBSS-193567.1.peg.90	Pyrroline-5-carboxylate reductase (EC 1.5.1.2) - #2	0	0.106761	0	0	0	0.903537	1	1	1
Clustering-based subsystems	Clustering-based subsystems	CBSS-630.2.peg.3360	Pyrroline-5-carboxylate reductase (EC 1.5.1.2) - #3	0	0.106761	0	0	0	0.903537	1	1	1
Clustering-based subsystems	Clustering-based subsystems	Conserved gene cluster associated with Met-tRNA formyltransferase	Helicase PriA essential for oriC/DnaA-independent DNA replication	0	0.10594	0.178305	0.257256	0.526425	0.904208	0.848677	0.795383	0.655125
Clustering-based subsystems	Hypothetical in Lysine biosynthetic cluster	CBSS-323850.3.peg.3269	Diaminopimelate decarboxylase (EC 4.1.1.20) - #1	0.257329	0.385162	0.278758	0.363426	0.404054	0.907712	0.983242	0.922184	0.895499
Clustering-based subsystems	Clustering-based subsystems	Shikimate kinase containing cluster	Shikimate kinase I (EC 2.7.1.71) - #2	0	0.0977276	0.033903	0.0522679	0.129297	0.910973	0.967209	0.950328	0.885506
Clustering-based subsystems	Clustering-based subsystems	CBSS-196620.1.peg.2477	Ferrous iron transport protein B	0	0.0960851	0.223509	0.215605	0.39251	0.912338	0.817322	0.822635	0.718128
Clustering-based subsystems	Clustering-based subsystems	Bacterial Cell Division	Cell division protein FtsW - #1	0.226294	0.341636	0.410603	0.162521	0.274757	0.914029	0.86934	1.05486	0.961983
Clustering-based subsystems	Clustering-based subsystems	Conserved gene cluster associated with Met-tRNA formyltransferase	Ribosomal RNA small subunit methyltransferase B (EC 2.1.1.-)	0	0.0936214	0.0878966	0.0857521	0	0.914393	0.919205	0.921021	1
Clustering-based subsystems	Clustering-based subsystems	Bacterial Cell Division	Cytoplasmic axial filament protein CafA and Ribonuclease G (EC 3.1.4.-)	0.256036	0.368737	0.326473	0.327491	0.362495	0.91766	0.946899	0.946172	0.921865
Clustering-based subsystems	TldD cluster	CBSS-354.1.peg.2917	Cytoplasmic axial filament protein CafA and Ribonuclease G (EC 3.1.4.-) - #1	0.256036	0.368737	0.326473	0.327491	0.362495	0.91766	0.946899	0.946172	0.921865
Clustering-based subsystems	Clustering-based subsystems	Glycogen metabolism cluster	1,4-alpha-glucan (glycogen) branching enzyme, GH-13-type (EC 2.4.1.18) - #2	0.0918107	0.188885	0.116777	0.242556	0.318626	0.918348	0.977644	0.878681	0.827991
Clustering-based subsystems	Shiga toxin cluster	CBSS-194948.1.peg.143	P protein	0.929745	1.10046	0.700662	0.931023	0.831198	0.918724	1.1347	0.999339	1.05382
Clustering-based subsystems	Clustering-based subsystems	RNA modification and chromosome partitioning cluster	GTPase and tRNA-U34 5-formylation enzyme TrmE	0	0.0862303	0.168259	0.238472	0.180093	0.920615	0.855974	0.807446	0.847391
Clustering-based subsystems	Clustering-based subsystems	RNA modification cluster	GTPase and tRNA-U34 5-formylation enzyme TrmE - #1	0	0.0862303	0.168259	0.238472	0.180093	0.920615	0.855974	0.807446	0.847391
Clustering-based subsystems	Clustering-based subsystems	CBSS-280355.3.peg.2835	tRNA nucleotidyltransferase (EC 2.7.7.21) (EC 2.7.7.25)	0.356898	0.467286	0.323962	0.309524	0.272448	0.924767	1.02488	1.03618	1.06637
Clustering-based subsystems	Clustering-based subsystems	Bacterial RNA-metabolizing Zn-dependent hydrolases	Trk system potassium uptake protein TrkA	0.240518	0.340815	0.185839	0.133937	0	0.925197	1.04611	1.09399	1.24052
Clustering-based subsystems	Clustering-based subsystems	Conserved gene cluster associated with Met-tRNA formyltransferase	Trk system potassium uptake protein TrkA - #1	0.240518	0.340815	0.185839	0.133937	0	0.925197	1.04611	1.09399	1.24052
Clustering-based subsystems	Clustering-based subsystems	CBSS-262719.3.peg.410	LSU ribosomal protein L9p	0	0.0780179	0.097942	0.107803	0.12468	0.927628	0.910795	0.902688	0.889142
Clustering-based subsystems	Clustering-based subsystems	CBSS-228410.1.peg.134	Hydroxyacylglutathione hydrolase (EC 3.1.2.6) - #1	0	0.0780179	0.048971	0.0563514	0.265521	0.927628	0.953315	0.946655	0.790188
Clustering-based subsystems	Clustering-based subsystems	CBSS-292415.3.peg.2341	Hydroxyacylglutathione hydrolase (EC 3.1.2.6) - #2	0	0.0780179	0.048971	0.0563514	0.265521	0.927628	0.953315	0.946655	0.790188
Clustering-based subsystems	DNA polymerase III epsilon cluster	CBSS-342610.3.peg.1536	Hydroxyacylglutathione hydrolase (EC 3.1.2.6) - #3	0	0.0780179	0.048971	0.0563514	0.265521	0.927628	0.953315	0.946655	0.790188
Clustering-based subsystems	Clustering-based subsystems	Bacterial Cell Division	Cell division protein FtsX	0	0.0771966	0	0.0539013	0	0.928336	1	0.948855	1
Clustering-based subsystems	Protein export?	CBSS-393121.3.peg.2760	Cell division protein FtsX - #1	0	0.0771966	0	0.0539013	0	0.928336	1	0.948855	1
Clustering-based subsystems	Putative asociate of RNA polymerase sigma-54 factor rpoN	CBSS-316057.3.peg.1308	RNA polymerase sigma-54 factor RpoN - #1	0	0.0739117	0.090408	0.170687	0.35095	0.931175	0.917088	0.854199	0.74022
Clustering-based subsystems	Clustering-based subsystems	Lipopolysaccharide assembly cluster	RNA polymerase sigma-54 factor RpoN	0	0.0739117	0.090408	0.170687	0.35095	0.931175	0.917088	0.854199	0.74022
Clustering-based subsystems	Clustering-based subsystems	CBSS-176279.3.peg.868	LSU ribosomal protein L21p	0	0.0689842	0.136868	0.160071	0	0.935468	0.87961	0.862017	1
Clustering-based subsystems	Clustering-based subsystems	CBSS-235.1.peg.567	GTP-binding protein	2.05992	2.27073	1.85085	2.04825	2.16342	0.935547	1.07334	1.00383	0.967282
Clustering-based subsystems	Clustering-based subsystems	CBSS-269801.1.peg.1715	Ribosomal RNA small subunit methyltransferase D (EC 2.1.1.-)	0	0.0673417	0.0765956	0.0498179	0.0969731	0.936907	0.928854	0.952546	0.911599
Clustering-based subsystems	proteosome related	Cluster-based Subsystem Grouping Hypotheticals - perhaps Proteosome Related	Twin-arginine translocation protein TatC	0	0.0665205	0.151936	0.136387	0.175475	0.937628	0.868104	0.879982	0.85072
Clustering-based subsystems	Clustering-based subsystems	CBSS-262719.3.peg.410	Adenylosuccinate synthetase (EC 6.3.4.4)	0.323277	0.409799	0.454551	0.438561	0.514881	0.938628	0.90975	0.919862	0.873519
Clustering-based subsystems	Sulfatases and sulfatase modifying factor 1 (and a hypothetical)	Sulfatases and sulfatase modifying factor 1	N-acetylgalactosamine 6-sulfate sulfatase (GALNS) - #1	0	0.064878	0	0.013067	0.0115444	0.939075	1	0.987102	0.988587
Clustering-based subsystems	Clustering-based subsystems	CBSS-176299.4.peg.1996A	Endoribonuclease L-PSP	0	0.0640568	0	0.0669683	0	0.939799	1	0.937235	1
Clustering-based subsystems	Ribosomal Protein L28P relates to a set of uncharacterized proteins	A Gram-positive cluster that relates ribosomal protein L28P to a set of uncharacterized proteins	Ribosome small subunit-stimulated GTPase EngC	0.122845	0.194634	0.210952	0.149454	0	0.939907	0.927242	0.976851	1.12285
Clustering-based subsystems	Cytochrome biogenesis	CBSS-196164.1.peg.1690	Iron-sulfur cluster assembly protein SufB	0.460347	0.553516	0.610254	0.362609	0.429452	0.940027	0.906905	1.07173	1.02161
Clustering-based subsystems	Protein export?	CBSS-393121.3.peg.2760	Membrane proteins related to metalloendopeptidases	0	0.0624143	0.0841296	0	0.120062	0.941252	0.922399	1	0.892808
Clustering-based subsystems	Clustering-based subsystems	Conserved gene cluster associated with Met-tRNA formyltransferase	Ribonuclease HII (EC 3.1.26.4)	0.113794	0.182315	0.0929193	0.14047	0	0.942044	1.0191	0.976609	1.11379
Clustering-based subsystems	Clustering-based subsystems	CBSS-312309.3.peg.1965	Methionine aminopeptidase (EC 3.4.11.18)	0.281898	0.360525	0.215975	0.25644	0.217035	0.942208	1.05421	1.02026	1.0533
Clustering-based subsystems	Clustering-based subsystems	EC49-61	Survival protein SurA precursor (Peptidyl-prolyl cis-trans isomerase SurA) (EC 5.2.1.8) - #1	0	0.0599506	0	0.096369	0.159313	0.94344	1	0.912102	0.86258
Clustering-based subsystems	Clustering-based subsystems	CBSS-320372.3.peg.6046	Aspartate carbamoyltransferase (EC 2.1.3.2)	0.402157	0.486174	0.317684	0.299724	0.272448	0.943467	1.06411	1.07881	1.10194
Clustering-based subsystems	Putative asociate of RNA polymerase sigma-54 factor rpoN	CBSS-316057.3.peg.1308	macromolecule metabolism	0.0387933	0.100191	0.105476	0.138837	0.0600309	0.944193	0.93968	0.912153	0.979965
Clustering-based subsystems	Clustering-based subsystems	Cell division-ribosomal stress proteins cluster	Hypoxanthine-guanine phosphoribosyltransferase (EC 2.4.2.8)	0.103449	0.168354	0.048971	0.0514513	0.113135	0.944447	1.05193	1.04945	0.991298
Clustering-based subsystems	Clustering-based subsystems	EC49-61	Dimethyladenosine transferase (EC 2.1.1.-)	0.147414	0.214344	0	0.14292	0.256286	0.944884	1.14741	1.00393	0.913339
Clustering-based subsystems	Clustering-based subsystems	CBSS-281090.3.peg.464	Alanyl-tRNA synthetase (EC 6.1.1.7)	0.84828	0.955924	0.737076	0.701534	0.74346	0.944965	1.06402	1.08624	1.06012
Clustering-based subsystems	Hypothetical protein possible functionally linked with Alanyl-tRNA synthetase	CBSS-257314.1.peg.488	Alanyl-tRNA synthetase (EC 6.1.1.7) - #1	0.84828	0.955924	0.737076	0.701534	0.74346	0.944965	1.06402	1.08624	1.06012
Clustering-based subsystems	Oxidative stress	CoA-disulfide reductase (EC 1.8.1.14) containing cluster	PaaD-like protein (DUF59) involved in Fe-S cluster assembly	0.0698279	0.128114	0.0703173	0.0686017	0.117753	0.948334	0.999543	1.00115	0.957124
Clustering-based subsystems	Translation	CBSS-326442.4.peg.1852	DNA-3-methyladenine glycosylase (EC 3.2.2.20)	0.0168104	0.0714479	0	0	0.0623398	0.949006	1.01681	1.01681	0.957142
Clustering-based subsystems	Fatty acid metabolic cluster	COG1399	GTP-binding protein EngA - #1	0.413795	0.489459	0.33024	0.417327	0.399437	0.9492	1.06281	0.997508	1.01026
Clustering-based subsystems	Clustering-based subsystems	CBSS-290633.1.peg.1906	GTP-binding protein EngA	0.413795	0.489459	0.33024	0.417327	0.399437	0.9492	1.06281	0.997508	1.01026
Clustering-based subsystems	Clustering-based subsystems	CBSS-83332.1.peg.3803	Propionyl-CoA carboxylase beta chain (EC 6.4.1.3) - #1	0.443536	0.520667	0.199651	0.177221	0.180093	0.949279	1.2033	1.22622	1.22324
Clustering-based subsystems	Putrescine/GABA utilization cluster-temporal,to add to SSs	GABA and putrescine metabolism from cluters	Putrescine transport system permease protein PotH (TC 3.A.1.11.2) - #1	0.0931038	0.151108	0.0816183	0.0726851	0.0300155	0.94961	1.01062	1.01904	1.06125
Clustering-based subsystems	Clustering-based subsystems	CBSS-83333.1.peg.946	LSU m5C1962 methyltransferase RlmI	0.0698279	0.126471	0.067806	0.101269	0.0761931	0.949716	1.00189	0.97145	0.994085
Clustering-based subsystems	Translation	CBSS-326442.4.peg.1852	LSU m5C1962 methyltransferase RlmI - #1	0.0698279	0.126471	0.067806	0.101269	0.0761931	0.949716	1.00189	0.97145	0.994085
Clustering-based subsystems	Clustering-based subsystems	LMPTP YwlE cluster	Uracil phosphoribosyltransferase (EC 2.4.2.9)	0.178449	0.239802	0.090408	0.143737	0	0.950514	1.08074	1.03035	1.17845
Clustering-based subsystems	Clustering-based subsystems	Cluster containing CofD-like protein and co-occuring with DNA repair	FIG000506: Predicted P-loop-containing kinase	0.177156	0.23816	0.101709	0.080852	0.0969731	0.95073	1.06848	1.0891	1.07309
Clustering-based subsystems	Clustering-based subsystems	Lipopolysaccharide assembly cluster	FIG000506: Predicted P-loop-containing kinase - #1	0.177156	0.23816	0.101709	0.080852	0.0969731	0.95073	1.06848	1.0891	1.07309
Clustering-based subsystems	Fatty acid metabolic cluster	COG1399	Ribosomal large subunit pseudouridine synthase C (EC 4.2.1.70)	0	0.0517382	0.10422	0.0449178	0	0.950807	0.905616	0.957013	1
Clustering-based subsystems	Probably GTP or GMP signaling related	CBSS-176299.4.peg.1292	Ribonuclease III (EC 3.1.26.3) - #2	0.130604	0.188885	0.189606	0.195188	0	0.950978	0.950402	0.945963	1.1306
Clustering-based subsystems	Fatty acid metabolic cluster	COG1399	Ribonuclease III (EC 3.1.26.3) - #1	0.130604	0.188885	0.189606	0.195188	0	0.950978	0.950402	0.945963	1.1306
Clustering-based subsystems	Molybdopterin oxidoreductase	CBSS-269799.3.peg.2220	Molybdopterin oxidoreductase, iron-sulfur binding subunit (EC 1.2.7.-)	0	0.0509169	0.090408	0.129036	0.113135	0.95155	0.917088	0.885711	0.898363
Clustering-based subsystems	Clustering-based subsystems	Glycogen metabolism cluster	4-alpha-glucanotransferase (amylomaltase) (EC 2.4.1.25) - #2	0	0.0500957	0	0.0220505	0.0808109	0.952294	1	0.978425	0.925231
Clustering-based subsystems	Clustering-based subsystems	Maltose utilization cluster	4-alpha-glucanotransferase (amylomaltase) (EC 2.4.1.25) - #3	0	0.0500957	0	0.0220505	0.0808109	0.952294	1	0.978425	0.925231
Clustering-based subsystems	Clustering-based subsystems	CBSS-630.2.peg.3360	Radical SAM family enzyme, similar to coproporphyrinogen III oxidase, oxygen-independent, clustered with nucleoside-triphosphatase RdgB	0	0.0500957	0.0590163	0.0620682	0.203182	0.952294	0.944273	0.941559	0.83113
Clustering-based subsystems	proteosome related	Cluster-based Subsystem Grouping Hypotheticals - perhaps Proteosome Related	Bacterial proteasome-activating AAA-ATPase (PAN)	0.0698279	0.123186	0.0125567	0.00245006	0.0369421	0.952494	1.05656	1.06721	1.03171
Clustering-based subsystems	Clustering-based subsystems	Conserved gene cluster associated with Met-tRNA formyltransferase	Rossmann fold nucleotide-binding protein Smf possibly involved in DNA uptake	0	0.0492744	0.131845	0.0669683	0	0.95304	0.883513	0.937235	1
Clustering-based subsystems	Clustering-based subsystems	CBSS-196620.1.peg.2477	Delta-1-pyrroline-5-carboxylate dehydrogenase (EC 1.5.1.12) - #2	0.139656	0.195455	0.243599	0.191921	0.256286	0.953324	0.916417	0.95615	0.907163
Clustering-based subsystems	Sulfatases and sulfatase modifying factor 1 (and a hypothetical)	Sulfatases and sulfatase modifying factor 1	Arylsulfatase (EC 3.1.6.1)	0.506899	0.580617	0.237321	0.412427	0.33017	0.953361	1.21787	1.06689	1.13286
Clustering-based subsystems	Clustering-based subsystems	Cluster containing CofD-like protein and co-occuring with DNA repair	FIG002813: LPPG:FO 2-phospho-L-lactate transferase like, CofD-like	0.0762934	0.128935	0.056505	0	0.0507954	0.953371	1.01873	1.07629	1.02427
Clustering-based subsystems	Clustering-based subsystems	CBSS-235.1.peg.567	Dihydropteroate synthase (EC 2.5.1.15)	0.150001	0.206131	0.306383	0.215605	0.258595	0.953462	0.880294	0.946031	0.913718
Clustering-based subsystems	Clustering-based subsystems	USS-DB-7	ClpB protein	0.408622	0.47632	0.662992	0.932656	0.895846	0.954145	0.847041	0.728853	0.743005
Clustering-based subsystems	Tricarboxylate transporter	CBSS-49338.1.peg.459	TRAP-type C4-dicarboxylate transport system, periplasmic component	0.125432	0.17903	0.110499	0.159254	0.138533	0.95454	1.01345	0.970824	0.988493
Clustering-based subsystems	Clustering-based subsystems	Conjugative transfer related cluster	Periplasmic thiol:disulfide interchange protein DsbA	0.0103449	0.0583081	0	0.0334841	0.0554132	0.954679	1.01034	0.97761	0.957298
Clustering-based subsystems	Clustering-based subsystems	Conserved gene cluster associated with Met-tRNA formyltransferase	Ribosomal RNA large subunit methyltransferase N (EC 2.1.1.-)	0.298708	0.359703	0.207185	0.28094	0.249359	0.955141	1.07582	1.01387	1.0395
Clustering-based subsystems	Cytochrome biogenesis	CBSS-196164.1.peg.1690	Iron-sulfur cluster assembly protein SufD	0.138363	0.190528	0.0929193	0.117603	0	0.956183	1.04158	1.01858	1.13836
Clustering-based subsystems	Clustering-based subsystems	CBSS-251221.1.peg.1863	Phosphoribosylaminoimidazole-succinocarboxamide synthase (EC 6.3.2.6)	0.159052	0.21188	0.170771	0.215605	0.318626	0.956409	0.989991	0.953478	0.878985
Clustering-based subsystems	Recombination related cluster	CBSS-198094.1.peg.4426	Ribonuclease HIII (EC 3.1.26.4)	0	0.0451682	0.00251133	0	0.039251	0.956784	0.997495	1	0.962231
Clustering-based subsystems	TldD cluster	CBSS-354.1.peg.2917	FIG005080: Possible exported protein	0	0.0435257	0.041437	0.0367509	0.316317	0.95829	0.960212	0.964552	0.759695
Clustering-based subsystems	recX and regulatory cluster	CBSS-261594.1.peg.788	A/G-specific adenine glycosylase (EC 3.2.2.-) - #1	0.0750003	0.121544	0.097942	0.12087	0.147768	0.958501	0.979105	0.959077	0.9366
Clustering-based subsystems	Clustering-based subsystems	CBSS-176280.1.peg.1561	A/G-specific adenine glycosylase (EC 3.2.2.-)	0.0750003	0.121544	0.097942	0.12087	0.147768	0.958501	0.979105	0.959077	0.9366
Clustering-based subsystems	Clustering-based subsystems	CBSS-393121.3.peg.1913	ATP-dependent DNA helicase UvrD/PcrA	0.810779	0.888582	0.842552	0.689283	0.780402	0.958804	0.982756	1.07192	1.01706
Clustering-based subsystems	Fatty acid metabolic cluster	COG1399	Thymidylate kinase (EC 2.7.4.9) - #1	0.184915	0.235696	0.156958	0.164971	0.251668	0.958905	1.02416	1.01712	0.946668
Clustering-based subsystems	Clustering-based subsystems	CBSS-393133.3.peg.2787	Thymidylate kinase (EC 2.7.4.9)	0.184915	0.235696	0.156958	0.164971	0.251668	0.958905	1.02416	1.01712	0.946668
Clustering-based subsystems	Clustering-based subsystems	Nucleoside Catabolism cluster	Deoxyribose-phosphate aldolase (EC 4.1.2.4) - #1	0.300001	0.355597	0.195884	0.132303	0	0.958988	1.08706	1.1481	1.3
Clustering-based subsystems	proteosome related	Cluster-based Subsystem Grouping Hypotheticals - perhaps Proteosome Related	Pup ligase PafA, possible component of postulated heterodimer PafA-PafA'	0.0400864	0.0837665	0.00502266	0.00408343	0	0.959696	1.03489	1.03586	1.04009
Clustering-based subsystems	Methylamine utilization	Glutamate-mediated methylamine utilization pathway	Sarcosine oxidase beta subunit (EC 1.5.3.1)	0	0.041062	0.0351587	0.0408343	0.113135	0.960558	0.966035	0.960768	0.898363
Clustering-based subsystems	Sarcosine oxidase	Sarcosine oxidase subunits	Sarcosine oxidase beta subunit (EC 1.5.3.1) - #1	0	0.041062	0.0351587	0.0408343	0.113135	0.960558	0.966035	0.960768	0.898363
Clustering-based subsystems	Clustering-based subsystems	Lipopolysaccharide assembly cluster	Arabinose 5-phosphate isomerase (EC 5.3.1.13) - #1	0.0633623	0.106761	0.156958	0.12332	0.205491	0.960787	0.919102	0.946625	0.882099
Clustering-based subsystems	Cytochrome biogenesis	CBSS-196164.1.peg.461	Ccs1/ResB-related putative cytochrome C-type biogenesis protein	0.0866383	0.130577	0.0464596	0	0.108517	0.961136	1.03839	1.08664	0.980263
Clustering-based subsystems	Clustering-based subsystems	CBSS-160492.1.peg.550	Phosphoheptose isomerase (EC 5.3.1.-) - #2	0.0323277	0.0739117	0.056505	0.0645182	0.0438688	0.961278	0.977116	0.96976	0.988944
Clustering-based subsystems	Methylamine utilization	Glutamate-mediated methylamine utilization pathway	Sarcosine oxidase alpha subunit (EC 1.5.3.1)	0	0.0402408	0.0251133	0.0735018	0.0900464	0.961316	0.975502	0.931531	0.917392
Clustering-based subsystems	Sarcosine oxidase	Sarcosine oxidase subunits	Sarcosine oxidase alpha subunit (EC 1.5.3.1) - #1	0	0.0402408	0.0251133	0.0735018	0.0900464	0.961316	0.975502	0.931531	0.917392
[truncated: 4,804 more rows]

## Sheet: Subs_Lev1_%_Rel_Abund
ID	OPA-nc	DAS-lc	BAR-mc	LAR-hc	TUR-hc	Gradual increase	Gradual decrease	FP3-polluted	FP3-unpolluted
Amino_Acids_and_Derivatives	6.58174	4.4843	6.54704	3.78031	10.146	0	0	0	0
Carbohydrates	2.76008	0.269058	5.52861	6.52639	10.9465	0	0	0	0
Cell Wall_and_Capsule	2.12314	0	0	0.53495	2.31476	0	0	0	0
Cell_Division_and_Cell_Cycle	0	0	0.484966	3.78031	2.09843	0	1	1	0
Clustering_based	0.849257	21.6143	6.11057	0.85592	10.8707	0	0	0	0
Cofactors_Vitamins_Prosthetic_Pigments	14.6497	12.3767	9.89331	11.4836	5.62466	0	0	0	0
DNA_Metabolism	0.212314	0	0.969932	0	1.47107	0	0	0	0
Fatty_Acids_Lipids_and_Isoprenoids	0	0	0.727449	0.178317	1.27637	0	0	1	0
Iron_acquisition_and_metabolism	1.06157	0	0	0	0.183883	0	0	0	0
Membrane_Transport	0	0	0.387973	0	3.87236	0	0	1	0
Metabolism_of_Aromatic Compounds	2.12314	0	0	0	1.00595	0	0	0	0
Miscellaneous	0.849257	31.8386	8.5839	0	5.50568	0	0	0	0
Motility_and_Chemotaxis	0	0	0	0.178317	1.18983	0	1	1	0
Nitrogen_Metabolism	0	0	1.21242	1.28388	2.10925	0	1	1	0
Nucleosides_and_Nucleotides	1.91083	0	1.4064	0	0.205516	0	0	0	0
Phages_Prophages_Transposable_elements_Plasmids	0.212314	0	3.54025	2.99572	2.70416	0	0	0	0
Phosphorus_Metabolism	0	0	0.193986	0	1.84965	0	0	1	0
Photosynthesis	8.28025	1.25561	1.89137	1.42653	0.248783	0	0	0	0
Potassium_metabolism	0	0	0.14549	0	1.298	0	0	1	0
[truncated: 9 more rows]

## Sheet: List_Subsystems_All_levels
Subsystems Level 3	Subsystems Level 2	Subsystems Level 1
[truncated: 988 more rows]

[truncated: 8 more sheets: Funct.Profiles.Classification, FP1, FP2, FP3-OPA-Specific, FP3-Polluted-Lakes, Resume-Profiles, Abundant_Functions, Virulence_defense_Subsystem]
